# Supplementary material for: Chelation-assisted α and β C–H functionalization of aryl alkenes with alkynes and alkenes
Source: Royal Society of Chemistry journal article supplement (doi:10.1039/d4qo00325j), 2024-01-01
Supplement: d4qo00325j1.pdf [file d4qo00325j1.pdf]

## Supporting Information

For the article entitled

# Chelation-Assisted $\alpha$ and $\beta$ C–H Functionalization of Aryl Alkenes with Alkynes and Alkenes

Cheng Zhang,<sup>a</sup> Yu Lin,<sup>a</sup> Yuhang Zhu,<sup>a</sup> Chengxing Peng,<sup>a</sup> Binbin Lv,<sup>a</sup> Li Zhao,<sup>a\*</sup>

Guofu Zhong,<sup>a,b</sup> Jinfeng Wei,<sup>d</sup> and Jian Zhang<sup>a,c\*</sup>

<sup>a</sup> College of Materials, Chemistry and Chemical Engineering, Key Laboratory of Organosilicon Chemistry and Material Technology, Ministry of Education, Hangzhou Normal University, Hangzhou 311121, Zhejiang, China.

<sup>b</sup> Department of chemistry, Eastern Institute of Technology, Ningbo 315200, Zhejiang, China.

<sup>c</sup> Department of Stomatology, The Affiliated Hospital of Hangzhou Normal University, Hangzhou Normal University, Hangzhou, 310015, Zhejiang, China

<sup>d</sup> Yanjia Oil Production Management Area of Dongxin Oil Production Plant in Shengli Oilfield, Dongying, 257000, Shandong, China

lizhao@hznu.edu.cn; zhangjian@hznu.edu.cn

# Table of Contents

|                                                                                            |           |
|--------------------------------------------------------------------------------------------|-----------|
| <b>1. General Methods .....</b>                                                            | <b>3</b>  |
| <b>2. General Procedure for Substrate Synthesis.....</b>                                   | <b>4</b>  |
| 2.1 General Procedure A for <i>trans</i> -Styrenes .....                                   | 4         |
| 2.2 General Procedure B for <i>trans</i> -Styrenes.....                                    | 5         |
| 2.3 Procedure C for Synthesis <i>cis</i> -Styrenes.....                                    | 6         |
| <b>3. General Procedure for Alkenyl C-H Alkenylation .....</b>                             | <b>7</b>  |
| 3.1 Conditional optimization .....                                                         | 7         |
| 3.2 General Procedure 1 for Cross-Coupling-1 between <i>cis</i> -Styrenes and Alkynes..... | 8         |
| 3.3 General Procedure 2 for Cross-Coupling-2 between Amides and Alkenes .....              | 14        |
| 3.4 General Procedure 3 for $\alpha$ -C-H Functionalization of <i>cis</i> -Styrenes .....  | 22        |
| <b>4. Pd-Catalyzed H/D Exchange.....</b>                                                   | <b>29</b> |
| 4.1 Pd-Catalyzed H/D Exchange in Cross-Coupling-1 .....                                    | 29        |
| 4.2 Pd-Catalyzed H/D Exchange in Cross-Coupling-2 .....                                    | 29        |
| <b>5. Competition Experiment for <i>trans</i>- and <i>cis</i>-Styrenes .....</b>           | <b>30</b> |
| <b>6. Synthetic Applications.....</b>                                                      | <b>31</b> |
| 6.1 Scaled-up Preparation.....                                                             | 31        |
| 6.2 DG Removal.....                                                                        | 32        |
| 6.3 Ester Hydrolysis .....                                                                 | 33        |
| 6.4 Ester Reduction .....                                                                  | 34        |
| 6.5 Proposed Mechanism.....                                                                | 34        |
| 6.6 Photophysical Properties.....                                                          | 34        |
| <b>7. References .....</b>                                                                 | <b>35</b> |
| <b>8. NMR Spectra .....</b>                                                                | <b>37</b> |
| 8.1 NMR Spectra of the Products <b>3</b> .....                                             | 37        |
| 8.2 NMR Spectra of the Products <b>5</b> .....                                             | 56        |
| 8.3 NMR Spectra of the Products <b>7</b> .....                                             | 77        |
| 8.4 NMR Spectra of Synthetic Applications.....                                             | 94        |
| 9. X-Ray Crystal Data.....                                                                 | 97        |

## 1. General Methods

Analytical thin layer chromatography (TLC) was performed using Merck 60 F254 precoated silica gel plate (0.2 mm thickness). Subsequent to elution, plates were visualized using UV radiation (254 nm) on Spectroline Model ENF-24061/F 254 nm. Further visualization was possible by staining with basic solution of potassium permanganate or acidic solution of ceric molybdate. Flash column chromatography was performed using Merck aluminium oxide 90 active neutral with freshly distilled solvents. Columns were typically packed as slurry and equilibrated with the appropriate solvent system prior to use. Proton nuclear magnetic resonance spectra ( $^1\text{H}$  NMR) were recorded on Bruker AMX 400 spectrophotometer ( $\text{CDCl}_3$  as solvent), and Bruker AMX 500 spectrophotometer ( $\text{CDCl}_3$  as solvent). Chemical shifts for  $^1\text{H}$  NMR spectra are reported as  $\delta$  in units of parts per million (ppm) downfield from  $\text{SiMe}_4$  ( $\delta$  0.0) and relative to the signal of chloroform-*d* ( $\delta$  7.26, singlet). Multiplicities were given as: s (singlet), d (doublet), t (triplet), q (quartets), dd (doublets of doublet) or m (multiplets). The number of protons (n) for a given resonance is indicated by nH. Coupling constants are reported as a *J* value in Hz. Carbon nuclear magnetic resonance spectra ( $^{13}\text{C}$  NMR) are reported as  $\delta$  in units of parts per million (ppm) downfield from  $\text{SiMe}_4$  ( $\delta$  0.0) and relative to the signal of chloroform-*d* ( $\delta$  77.0, triplet). Mass spectrometry was performed by Waters Q-ToF Premier Micromass instrument, using Electro Spray Ionization (ESI) mode. IR spectra were recorded as thin films on KBr plates on a Bio-Rad FTS 165 FTIR spectrometer and are reported in frequency of absorption ( $\text{cm}^{-1}$ ).  $\text{Pd}(\text{OAc})_2$  were purchased from TCI or Energy Chemical and used directly. Other reagents, unless otherwise noted below, are commercially available from TCI, Energy Chemical or Alfa Aesar (China) Chemical Co. Ltd. and used without further purification.

## 2. General Procedure for Substrate Synthesis

The benzyl amides are prepared according to previous methods and the synthetic route is shown as following. The data of benzyl amides is also consistent with the previous data.

### 2.1 General Procedure A for *trans*-Styrenes

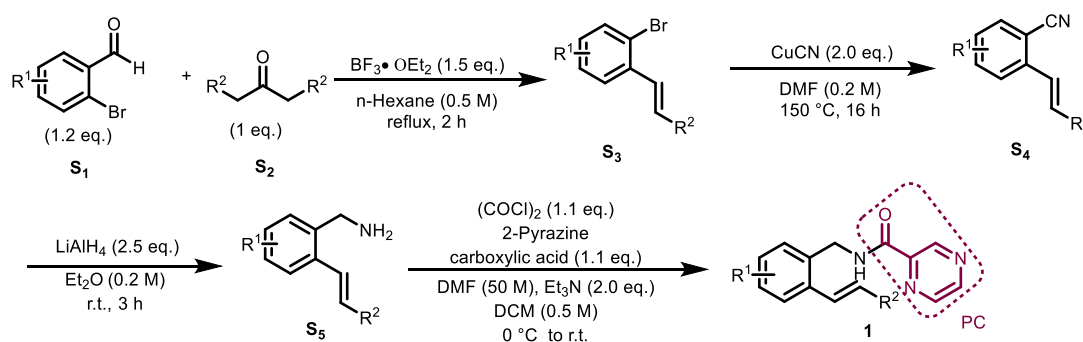

**General Procedure for Tandem Aldol-Grob Reaction<sup>[1]</sup>:** An oven-dried Schlenk flask was charged with 2-bromobenzaldehyde ( $S_1$ , 1.2 equiv), 5-nonanone ( $S_2$ , 1.0 equiv) and dry *n*-hexane (0.2 M). A solution of boron trifluoride diethyl etherate ( $BF_3 \cdot OEt_2$ ) (1.5 equiv) was added to the Schlenk flask, and the mixture was heated to reflux with stirring for 2 hours. The reaction was cooling down to room temperature and quenched with water. The aqueous layer was extracted three times with diethyl ether. The combined organic phase was dried over anhydrous  $Na_2SO_4$ . The organic phase was filtrated and concentrated in vacuo, and the crude product was purified by silica gel chromatography and eluted by hexane to obtain compound ( $S_3$ ) as a colorless liquid.

**General Procedure for Cyanation Reaction<sup>[2]</sup>:** To a mixture of  $CuCN$  (2.0 equiv) in DMF (0.2 M) was added 1-bromo-2-(pent-1-yn-1-yl) benzene ( $S_3$ , 1.0 equiv) at room temperature. The reaction was heated to  $150^\circ C$  with stirring for 16 h until the substrate was completely consumed. After that, the reaction was cooled down to room temperature and the mixture was diluted with  $H_2O$  and extracted with  $EtOAc$ . The organic layer was combined and dried over anhydrous  $Na_2SO_4$ . The organic phase was filtrated and concentrated in vacuo, and the resulting residue was purified by silica gel column chromatography (PE / EA) to give compound **S4**.

**General Procedure for Benzonitrile Reduction<sup>[3]</sup>:** A solution of substituted benzonitrile ( $S_4$ ) in  $Et_2O$  (0.2 M) was added  $LiAlH_4$  (4.0 equiv, 1.0 M in THF) over 30 min at  $0^\circ C$  and stirred at room temperature for 2 h. Then, 2 N  $NaOH$  was added slowly until a clear solution was obtained. The  $Et_2O$  layer was separated and the aqueous phase was extracted with  $Et_2O$ . The organic layers were combined and dried over anhydrous  $Na_2SO_4$ . After removing the solvent under reduced pressure, the resulting amine ( $S_5$ ) was obtained and used in the next step without further purification.

**General Procedure for Amide Preparation<sup>[4]</sup>:** A 50 mL round-bottomed flask

immersed in a 0°C bath (ice and water) was charged with 2-pyrazinecarboxylic acid (1.0 equiv) and CH<sub>2</sub>Cl<sub>2</sub> (0.5 M). To the stirred suspension was added oxalyl chloride (1.1 equiv, 2.0 M in methylene chloride) dropwise over a 15 minute period followed by the addition of DMF (50 M, catalytic amount) in one portion, producing a rust-red color and the evolution of a gas. The mixture was kept in the cooling bath for 1 h and then allowed to warm to room temperature. After gas evolution ceased, the mixture was again cooled to 0°C and NEt<sub>3</sub> (2.0 equiv) was added dropwise over a 15 minute period followed by the addition of benzylamine (1.1 equiv) over a 15 minute period. The brown mixture was left in the cooling bath for 30 minutes and then allowed to warm to room temperature. Stirring was continued at room temperature for 8 h. After the reaction was finished, the solvent was removed under vacuo to give the crude product as a brown solid that was extracted with CH<sub>2</sub>Cl<sub>2</sub>. The organic phases were combined and dried over anhydrous Na<sub>2</sub>SO<sub>4</sub>. The organic phase was filtrated and concentrated in vacuo, the resulting residue was purified by silica gel column chromatography (PE/EA = 8/1) to obtain the corresponding *trans*-styrenes **1**.

## 2.2 General Procedure B for *trans*-Styrenes

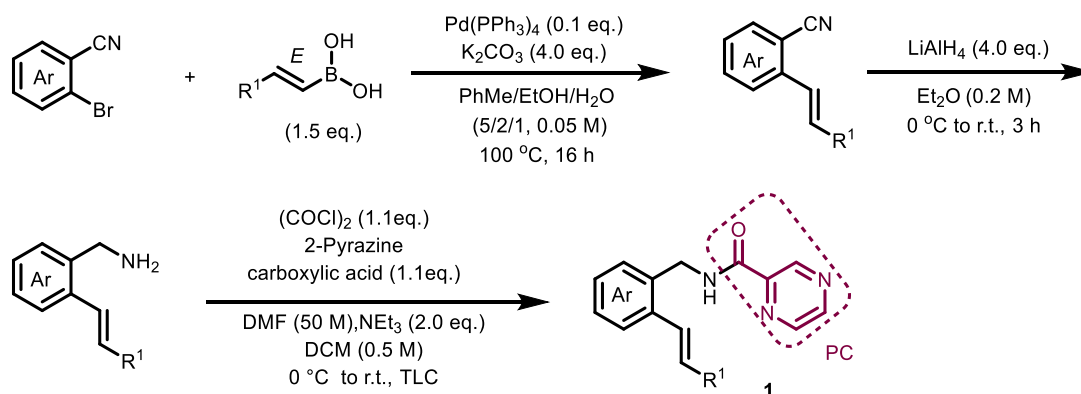

**General Procedure for synthesis (*E*)-alkenyl boronic acid<sup>[5]</sup>:** To a solution of terminal alkyl alkyne (1.0 equiv) in DCM (1 M) was added HBBR<sub>2</sub>Me<sub>2</sub>S (1.0 equiv, 1 M in DCM) at 0°C. After addition, the mixture was warm to room temperature and stirred for 4 h. The resulting solution was then dropwise added to an ice-cooled mixture of Et<sub>2</sub>O/H<sub>2</sub>O (0.5 M,  $v:v=2/1$ ) and continued stirring for 15 min. The aqueous layer was extracted with Et<sub>2</sub>O. The organic phase was combined and dried over anhydrous Na<sub>2</sub>SO<sub>4</sub>. After filtration and concentration in vacuo to afford (*E*)-alkenyl boronic acid which could be used directly.

**Suzuki Reaction<sup>[5]</sup>:** A solution of (*E*)-pent-1-en-1-yl boronic acid (1.5 equiv), Pd(PPh<sub>3</sub>)<sub>4</sub> (0.1 equiv), K<sub>2</sub>CO<sub>3</sub> (4.0 equiv), K<sub>3</sub>PO<sub>4</sub> (3.0 equiv), and ortho-bromoarene (1.0 equiv) in toluene/EtOH/H<sub>2</sub>O (100 mL,  $v:v:v=5/2/1$ , 0.05 M) was heated to 100°C with stirring for 16 h in a sealed tube under an argon atmosphere. Then the reaction was cooled to room temperature and diluted with H<sub>2</sub>O followed by extraction with EtOAc. The organic phase was combined and dried over anhydrous Na<sub>2</sub>SO<sub>4</sub>. After filtration and

concentration in vacuo, the crude product was purified by silica gel chromatography (SiO<sub>2</sub>, PE/EA) to afford the corresponding product.

**Benzonitrile Reduction and Amide Preparation** was performed following the **general procedure A** to obtain *trans*-styrenes **1**.

### 2.3 Procedure C for Synthesis of *cis*-Styrenes

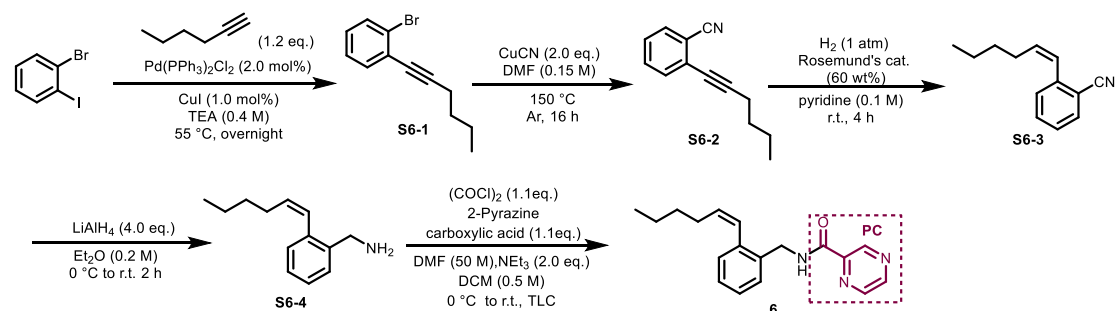

**Alkynylation Reaction**<sup>[7]</sup>: A solution of Pd(PPh<sub>3</sub>)<sub>2</sub>Cl<sub>2</sub> (1.0 mol%), CuI (1.0 mol%), 1-bromo-2-iodobenzene (1.0 equiv) and 1-pentyne (1.2 equiv) in NEt<sub>3</sub> (0.4 M) was heated to 55 °C with stirring for overnight. Then, the reaction was cooled to room temperature and diluted with H<sub>2</sub>O, and extracted with EtOAc. The organic phase was combined and dried over anhydrous Na<sub>2</sub>SO<sub>4</sub>. After filtration and concentration in vacuo, the crude product was purified by silica gel chromatography (SiO<sub>2</sub>, PE / EA) to obtain the corresponding product (**S6-1**).

**Cyanation Reaction** was performed following the **general procedure A** to obtain the corresponding product (**S6-2**)

**Hydrogenation Reaction:** Following the previously reported procedure with a slight modification, a two-necked flask was changed with Rosenmund's catalyst (60 wt%, 5% Pd on BaSO<sub>4</sub>), alkyne (**S6-2**) (1.0 equiv) and pyridine (0.1 M). The reaction bottle was vacuumed three times and then backfilled with H<sub>2</sub> three times. And then, the solution was allowed to stir at room temperature for 4 h until the reaction was completed (monitored by TLC). The reaction solution was diluted with ethyl acetate and washed with HCl (2 N), water and brine. The organic phase was then dried over anhydrous Na<sub>2</sub>SO<sub>4</sub>. After filtration and concentration in vacuo, the crude product was purified by silica gel chromatography (SiO<sub>2</sub>, PE/EA) to obtain olefin (**S6-3**).

**Benzonitrile Reduction and Amide Preparation** was performed following the **general procedure A** to obtain *cis*-styrenes **6**.

### 3. General Procedure for Alkenyl C-H Alkenylation

#### 3.1 Condition optimization

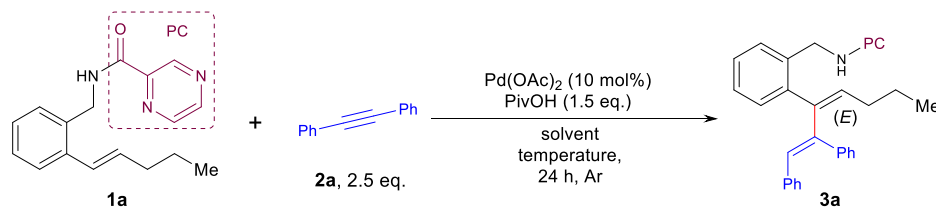

| Entry <sup>a</sup> | Temperature (°C) | Solvent     | Yield (% <sup>b</sup> , <i>E/Z</i> <sup>c</sup> ) |
|--------------------|------------------|-------------|---------------------------------------------------|
| <b>1</b>           | 40               | EtOH        | NR                                                |
| <b>2</b>           | 70               | EtOH        | 58% (86:14)                                       |
| <b>3</b>           | 100              | EtOH        | 96% (81:19)                                       |
| <b>4</b>           | 100              | MeOH        | 93% (65:34)                                       |
| <b>5</b>           | 100              | MeCN        | 90% (68:32)                                       |
| <b>6</b>           | 100              | DMSO        | 96% (42:58)                                       |
| <b>7</b>           | 100              | DMF         | 91% (74:26)                                       |
| <b>8</b>           | 100              | 1,4-dioxane | 97% (89:11)                                       |
| <b>9</b>           | 80               | 1,4-dioxane | 81% (96:4)                                        |
| <b>10</b>          | 90               | 1,4-dioxane | 87% (96:4)                                        |

<sup>a</sup> Conditions: **1a** (0.1 mmol), **2a** (0.25 mmol, 2.5 equiv.),  $\text{Pd}(\text{OAc})_2$  (10 mol%),  $\text{PivOH}$  (1.5 equiv.) in a solvent (0.15 M), 24 h under Ar; <sup>b</sup> Isolated yields; <sup>c</sup> *E/Z* ratios of the isomer given in parentheses were determined by <sup>1</sup>H NMR analysis.

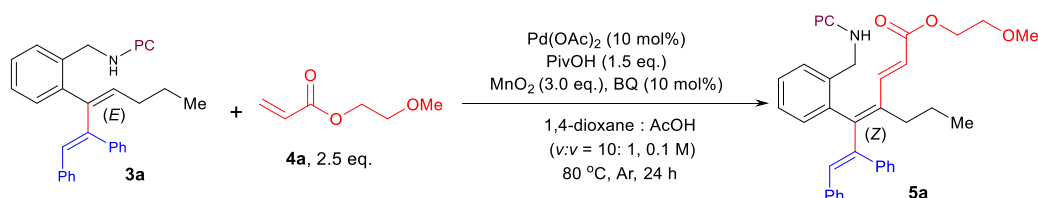

| Entry <sup>a</sup>    | Solvent            | Additive/Catalyst | Yield (% <sup>b</sup> , <i>E/Z</i> <sup>b,c</sup> ) |
|-----------------------|--------------------|-------------------|-----------------------------------------------------|
| <b>1</b>              | dioxane/AcOH=10:1  | $\text{PivOH}$    | 61% (>99:1)                                         |
| <b>2</b>              | DMF                | $\text{PivOH}$    | trace                                               |
| <b>3</b>              | DMSO               | $\text{PivOH}$    | trace                                               |
| <b>4</b>              | dioxane            | $\text{PivOH}$    | 65% (87:13)                                         |
| <b>5</b>              | MeCN               | $\text{PivOH}$    | 34% (63:37)                                         |
| <b>6</b>              | Toluene            | $\text{PivOH}$    | 77% (82:18)                                         |
| <b>7</b>              | DME                | $\text{PivOH}$    | 52% (>99:1)                                         |
| <b>8</b>              | EtOH               | $\text{PivOH}$    | 32% (>99:1)                                         |
| <b>9</b>              | EtOH               | 15mol% [Pd]       | 41% (>99:1)                                         |
| <b>10<sup>d</sup></b> | dioxane /AcOH=10:1 | $\text{PivOH}$    | 51% (>99:1)                                         |
| <b>11<sup>e</sup></b> | dioxane /AcOH=10:1 | $\text{PivOH}$    | 43% (>99:1)                                         |
| <b>12<sup>f</sup></b> | dioxane /AcOH=10:1 | $\text{PivOH}$    | 27% (>99:1)                                         |

|    |                    |                |             |
|----|--------------------|----------------|-------------|
| 13 | dioxane /AcOH=12:1 | PivOH          | 53% (98:2)  |
| 14 | dioxane /AcOH=8:1  | PivOH          | 44% (>99:1) |
| 15 | dioxane /AcOH=1:1  | PivOH          | 35% (>99:1) |
| 16 | EtOH/AcOH=10:1     | PivOH          | Trace       |
| 17 | dioxane /AcOH=10:1 | 15mol% [Pd]    | 48% (>99:1) |
| 18 | dioxane /AcOH=10:1 | PivOH          | 55% (>99:1) |
| 19 | dioxane /AcOH=10:1 | PivOH (2.5 eq) | 50% (>99:1) |
| 20 | dioxane /AcOH=10:1 | PivOH (1.0 eq) | Trace       |

<sup>a</sup> Conditions: **3a** (0.1 mmol), **4a** (0.25 mmol, 2.5 eq.), Pd(OAc)<sub>2</sub> (10 mol%), PivOH, MnO<sub>2</sub> (3.0 equiv.) and BQ (10 mol%) in solvent (0.1 M) heat and stir for 24 h under Ar; <sup>b</sup> Isolated yields; <sup>c</sup> E/Z ratios of the isomer given in parentheses were determined by <sup>1</sup>H NMR analysis; <sup>d</sup> 90 °C; <sup>e</sup> 100 °C; <sup>f</sup> 110 °C.

### 3.2 General Procedure 1 for Cross-Coupling-1 between *trans*-Styrenes and Alkynes

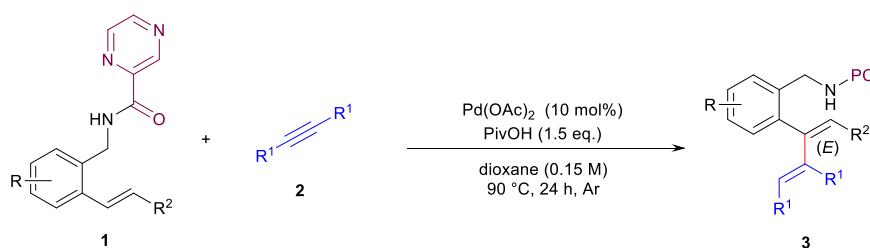

A screw-cap vial was charged with Pd(OAc)<sub>2</sub> (10 mol%, 0.015 mmol), *trans*-styrenes **1** (1.0 equiv, 0.15 mmol), alkyne **2** (2.5 equiv, 0.38 mmol) and 1,4-dioxane (1.0 mL). Then, pivalic acid (1.5 equiv, 0.23 mmol) were added into the solution. The vial was sealed under argon atmosphere and heated to 90°C with stirring for 24 h. After cooling down, the mixture was concentrated and directly applied to a flash column chromatography (PE/EA mixtures) for separation to obtain the corresponding product **3**.

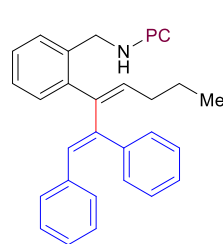

**N-(2-((1E,3E)-1,2-Diphenylhepta-1,3-dien-3-yl)benzyl)pyrazine-2-carboxamide (3a)** Following the **General Procedure 1**, **3a** was obtained as a yellow oil (60.0 mg, 87% yield, E/Z=96:4). **<sup>1</sup>H NMR** (500 MHz, CDCl<sub>3</sub>) δ 9.42 (d, *J* = 1.5 Hz, 1H), 8.68 (d, *J* = 2.5 Hz, 1H), 8.32 (dd, *J* = 2.5, 1.5 Hz, 1H), 7.93 (s, 1H), 7.31-7.28 (m, 1H), 7.18-7.12 (m, 6H), 7.08 (dd, *J* = 5.6, 2.5 Hz, 5H), 7.00-6.94 (m, 2H), 6.65 (s, 1H), 5.66 (t, *J* = 7.4 Hz, 1H), 4.73 (d, *J* = 5.8 Hz, 2H), 2.33 (q, *J* = 7.4 Hz, 2H), 1.55-1.46 (m, 2H), 0.95 (t, *J* = 7.4 Hz, 3H). **<sup>13</sup>C NMR** (125 MHz, CDCl<sub>3</sub>) δ 162.58, 147.08, 144.55, 144.36, 142.44, 142.41, 142.25, 140.83, 139.16, 136.65, 135.33, 135.04, 130.99, 130.89, 129.48, 129.21, 129.09, 128.40, 127.89, 127.43, 127.32, 127.20, 126.88, 41.48, 31.66, 23.35, 14.08. **HRMS (ESI)** *m/z* calculated for C<sub>31</sub>H<sub>29</sub>N<sub>3</sub>ONa [M+Na]<sup>+</sup>: 482.2203, found: 482.2207.



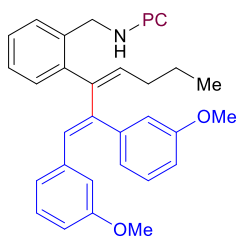

***N*-(2-((1*E*,3*E*)-1,2-bis(3-methoxyphenyl) hepta-1,3-dien-3-yl) benzyl) pyrazine-2-carboxamide (3b)** Following the **General Procedure 1**, **3b** was obtained as a yellow oil (36.6 mg, 47% yield, *E/Z*= 90:10). **<sup>1</sup>H NMR** (500 MHz, CDCl<sub>3</sub>) δ 9.42 (d, *J* = 1.6 Hz, 1H), 8.69 (d, *J* = 2.5 Hz, 1H), 8.38 – 8.32 (m, 1H), 7.92 (t, *J* = 5.9 Hz, 1H), 7.32 (dd, *J* = 5.2, 2.6 Hz, 1H), 7.22 – 7.16 (m, 3H), 7.11 (t, *J* = 7.9 Hz, 1H), 7.03 (t, *J* = 7.9 Hz, 1H), 6.73 – 6.68 (m, 2H), 6.68 – 6.60 (m, 4H), 6.53 (s, 1H), 5.67 (t, *J* = 7.4 Hz, 1H), 4.73 (d, *J* = 5.8 Hz, 2H), 3.61 (s, 3H), 3.52 (s, 3H), 2.36 (q, *J* = 7.3 Hz, 2H), 1.52 (h, *J* = 7.4 Hz, 2H), 0.97 (t, *J* = 7.4 Hz, 3H). **<sup>13</sup>C NMR** (125 MHz, CDCl<sub>3</sub>) δ 161.53, 158.55, 157.95, 146.06, 143.48, 143.33, 141.33, 141.22, 141.14, 139.79, 139.56, 136.81, 134.37, 133.96, 129.85, 129.82, 128.41, 128.09, 127.81, 126.42, 126.29, 121.30, 120.59, 113.36, 112.74, 112.53, 112.11, 54.06, 53.80, 40.42, 30.59, 22.30, 13.03. **HRMS (ESI)** *m/z* calculated for C<sub>33</sub>H<sub>33</sub>N<sub>3</sub>O<sub>3</sub>Na [M+Na]<sup>+</sup>: 542.2414, found: 542.2409.

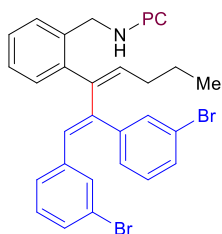

***N*-(2-((1*E*,3*E*)-1,2-bis (3-bromophenyl) hepta-1,3-dien-3-yl) benzyl) pyrazine-2-carboxamide (3c)** Following the **General Procedure 1**, **3c** was obtained as a yellow oil (42.3 mg, 46% yield, *E/Z*=93:7). **<sup>1</sup>H NMR** (500 MHz, CDCl<sub>3</sub>) δ 9.43 (d, *J* = 1.5 Hz, 1H), 8.70 (d, *J* = 2.4 Hz, 1H), 8.37 (dd, *J* = 2.5, 1.5 Hz, 1H), 7.91 (s, 1H), 7.34-7.27 (m, 2H), 7.25-7.21 (m, 2H), 7.21-7.16 (m, 2H), 7.11 (dd, *J* = 8.8, 1.8 Hz, 2H), 7.04 (t, *J* = 7.8 Hz, 1H), 6.99 (d, *J* = 7.7 Hz, 1H), 6.93 (t, *J* = 7.9 Hz, 1H), 6.84 (s, 1H), 6.59 (s, 1H), 5.72 (t, *J* = 7.4 Hz, 1H), 4.72 (d, *J* = 5.7 Hz, 2H), 2.28 (q, *J* = 7.4 Hz, 2H), 1.54-1.45 (m, 2H), 0.95 (t, *J* = 7.4 Hz, 3H). **<sup>13</sup>C NMR** (125 MHz, CDCl<sub>3</sub>) δ 162.56, 147.22, 144.41, 144.37, 142.45, 141.69, 141.43, 140.73, 140.67, 138.23, 136.18, 135.21, 132.42, 132.04, 130.95, 130.61, 130.28, 130.08, 130.05, 129.44, 129.38, 127.93, 127.84, 127.76, 127.60, 122.45, 122.06, 41.56, 31.69, 23.25, 14.05. **HRMS (ESI)** *m/z* calculated for C<sub>31</sub>H<sub>27</sub>Br<sub>2</sub>N<sub>3</sub>ONa [M+Na]<sup>+</sup>: 638.0413, found: 638.0417.

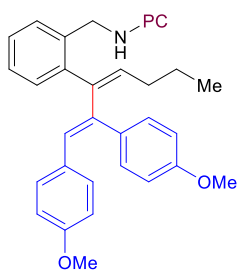

***N*-(2-((1*E*,3*E*)-1,2-Bis(4-methoxyphenyl) hepta-1,3-dien-3-yl) benzyl) pyrazine-2-carboxamide (3d)** Following the **General Procedure 1**, **3d** was obtained as a yellow oil (40.1 mg, 51% yield, *E/Z*=76:24). **<sup>1</sup>H NMR** (500 MHz, CDCl<sub>3</sub>) δ 9.44-9.39 (m, 1H), 8.68 (d, *J* = 2.4 Hz, 1H), 8.34 (dd, *J* = 2.3, 1.5 Hz, 1H), 7.90 (s, 1H), 7.16 (t, *J* = 3.4 Hz, 3H), 7.00 (d, *J* = 8.7 Hz, 2H), 6.93 (d, *J* = 8.7 Hz, 2H), 6.70 (d, *J* = 8.7 Hz, 2H), 6.63 (d, *J* = 8.8 Hz, 2H), 6.55 (s, 1H), 6.54-6.47 (m, 1H), 5.62 (t, *J* = 7.3 Hz, 1H), 4.73 (d, *J* = 5.8 Hz, 2H), 3.72 (d, *J* = 2.7 Hz, 6H), 2.33 (q, *J* = 7.3 Hz, 2H), 1.55-1.45 (m, 2H), 0.95 (t, *J* = 7.4 Hz, 3H). **<sup>13</sup>C NMR** (125 MHz, CDCl<sub>3</sub>) δ 162.55, 158.56, 158.39, 147.06, 144.56, 144.37, 142.83, 142.41, 142.27, 138.47, 135.30, 134.59, 131.55, 131.15, 130.83, 130.66, 130.40, 130.08, 129.50, 129.11, 127.29, 113.85, 113.35, 77.31, 77.06, 76.81, 55.17,

55.05, 41.46, 31.63, 23.39, 14.08. **HRMS (ESI)**  $m/z$  calculated for  $C_{33}H_{33}N_3O_3Na$   $[M+Na]^+$ : 542.2414, found: 542.2419.

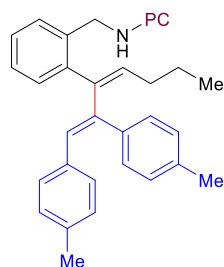

***N*-(2-((1*E*,3*E*)-1,2-Di-*p*-tolylhepta-1,3-dien-3-yl)benzyl)pyrazine-2-carboxamide (3e)** Following the **General Procedure 1**, **3e** was obtained as a yellow oil (60.7 mg, 83% yield, *E/Z*= 94:6). **<sup>1</sup>H NMR** (500 MHz, CDCl<sub>3</sub>) δ 9.42 (d, *J* = 1.5 Hz, 1H), 8.67 (d, *J* = 2.5 Hz, 1H), 8.33 (t, *J* = 1.9 Hz, 1H), 7.91 (s, 1H), 7.31-7.26 (m, 1H), 7.15 (q, *J* = 4.7, 4.2 Hz, 3H), 6.96 (s, 4H), 6.89 (s, 4H), 6.59 (s, 1H), 5.62 (d, *J* = 7.4 Hz, 1H), 4.72 (d, *J* = 5.8 Hz, 2H), 2.33 (q, *J* = 7.3 Hz, 2H), 2.24 (s, 3H), 2.24 (s, 3H), 1.54 – 1.45 (m, 2H), 0.94 (t, *J* = 7.4 Hz, 3H). **<sup>13</sup>C NMR** (125 MHz, CDCl<sub>3</sub>) δ 162.57, 147.04, 144.60, 144.42, 142.74, 142.45, 142.38, 139.90, 136.68, 136.59, 136.21, 135.35, 134.75, 133.95, 130.83, 130.60, 129.36, 129.11, 129.06, 128.61, 127.30, 127.25, 41.45, 31.65, 23.38, 21.27, 21.15, 14.08. **HRMS (ESI)**  $m/z$  calculated for  $C_{33}H_{33}N_3ONa$   $[M+Na]^+$ : 510.2516, found: 510.2525.

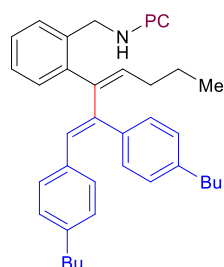

***N*-(2-((1*E*,3*E*)-1,2-bis (4-butylphenyl) hepta-1,3-dien-3-yl)benzyl)pyrazine-2-carboxamide (3f)** Following the **General Procedure 1**, **3f** was obtained as a yellow liquid (40.3 mg, 47% yield, *E/Z*= 95:5). **<sup>1</sup>H NMR** (500 MHz, CDCl<sub>3</sub>) δ 9.43-9.40 (m, 1H), 8.66 (d, *J* = 2.4 Hz, 1H), 8.30 (dd, *J* = 2.4, 1.5 Hz, 1H), 7.96 (s, 1H), 7.32-7.26 (m, 1H), 7.18-7.13 (m, 3H), 6.98 (s, 4H), 6.88 (s, 4H), 6.56 (s, 1H), 5.62 (t, *J* = 7.4 Hz, 1H), 4.72 (d, *J* = 5.9 Hz, 2H), 2.51 (dt, *J* = 13.7, 7.7 Hz, 4H), 2.29 (q, *J* = 7.4 Hz, 2H), 1.58-1.45 (m, 6H), 1.37 -1.22 (m, 4H), 0.95-0.87 (m, 9H). **<sup>13</sup>C NMR** (125 MHz, CDCl<sub>3</sub>) δ 162.56, 147.02, 144.59, 144.41, 142.74, 142.60, 142.35, 141.72, 141.64, 140.07, 136.57, 135.37, 134.66, 134.15, 130.90, 130.70, 129.36, 129.01, 128.43, 127.90, 127.27, 127.23, 41.50, 35.32, 35.30, 33.48, 33.36, 31.63, 23.36, 22.36, 22.23, 14.07, 13.98, 13.95. **HRMS (ESI)**  $m/z$  calculated for  $C_{39}H_{45}N_3ONa$   $[M+Na]^+$ : 594.3455, found: 594.3464.

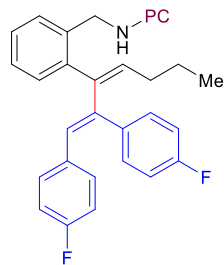

***N*-(2-((1*E*,3*E*)-1,2-bis (4-fluorophenyl) hepta-1,3-dien-3-yl)benzyl)pyrazine-2-carboxamide (3g)** Following the **General Procedure 1**, **3g** was obtained as a yellow liquid (49.5 mg, 67% yield, *E/Z*= 94:6). **<sup>1</sup>H NMR** (500 MHz, CDCl<sub>3</sub>) δ 9.43 (s, 1H), 8.71 (d, *J* = 2.3 Hz, 1H), 8.38 (dd, *J* = 2.4, 1.5 Hz, 1H), 7.82 (s, 1H), 7.30 (dd, *J* = 5.6, 3.3 Hz, 1H), 7.20-7.12 (m, 3H), 7.02 (dd, *J* = 8.6, 5.5 Hz, 2H), 6.94 (dd, *J* = 8.6, 5.6 Hz, 2H), 6.86 (t, *J* = 8.7 Hz, 2H), 6.79 (t, *J* = 8.7 Hz, 2H), 6.62 (s, 1H), 5.67 (t, *J* = 7.4 Hz, 1H), 4.71 (d, *J* = 5.7 Hz, 2H), 2.33 (q, *J* = 7.3 Hz, 2H), 1.55 – 1.46 (m, 2H), 0.96 (t, *J* = 7.4 Hz, 3H). **<sup>13</sup>C NMR** (125 MHz, CDCl<sub>3</sub>) δ 162.54, 161.95 (d, *J*<sub>CF</sub> = 246.9 Hz), 161.64 (d, *J*<sub>CF</sub> = 247.6 Hz), 147.20, 144.43, 144.39, 142.44, 141.97 (d, *J*<sub>CF</sub> = 19.3 Hz), 139.45 (d, *J*<sub>CF</sub> = 1.4 Hz), 135.26, 135.23, 134.80 (d, *J*<sub>CF</sub> = 3.4 Hz), 132.50 (d, *J*<sub>CF</sub> = 3.4 Hz), 131.05, 130.99, 130.90,

130.83, 130.75, 130.08, 129.17, 127.49 (d,  $J_{CF} = 20.6$  Hz), 115.59 (d,  $J_{CF} = 21.3$  Hz), 114.95 (d,  $J_{CF} = 21.4$  Hz), 41.35, 31.66, 23.33, 14.07. **<sup>19</sup>F NMR** (471 MHz, CDCl<sub>3</sub>) δ -114.22, -114.31. **HRMS (ESI)**  $m/z$  calculated for C<sub>31</sub>H<sub>27</sub>F<sub>2</sub>N<sub>3</sub>ONa [M+Na]<sup>+</sup>: 518.2014, found: 518.2020.

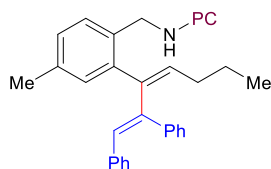

***N*-(2-((1*E*,3*E*)-1,2-diphenyl hepta-1,3-dien-3-yl)-4-methylbenzyl)pyrazine-2-carboxamide (3i)** Following the **General Procedure 1**, **3i** was obtained as a yellow solid (87.1mg, 77% yield,  $E/Z=95:5$ , m.p. = 102.6-103.7 °C). **<sup>1</sup>H NMR** (500 MHz, CDCl<sub>3</sub>) δ 9.41 (d,  $J = 1.5$  Hz, 1H), 8.65 (d,  $J = 2.4$  Hz, 1H), 8.30 (s, 1H), 7.88 (s, 1H), 7.17 (dd,  $J = 14.0, 7.7$  Hz, 4H), 7.10-7.04 (m, 5H), 7.00-6.94 (m, 4H), 6.63 (s, 1H), 5.64 (t,  $J = 7.4$  Hz, 1H), 4.68 (d,  $J = 5.7$  Hz, 2H), 2.30 (q,  $J = 7.4$  Hz, 2H), 2.25 (s, 3H), 1.54 – 1.43 (m, 2H), 0.93 (t,  $J = 7.4$  Hz, 3H). **<sup>13</sup>C NMR** (125 MHz, CDCl<sub>3</sub>) δ 162.52, 147.04, 144.60, 144.34, 142.47, 142.40, 142.21, 140.96, 139.27, 136.95, 136.73, 134.88, 132.38, 131.43, 130.98, 129.48, 129.24, 129.19, 128.40, 128.18, 127.89, 127.19, 126.85, 41.27, 31.68, 23.36, 21.06, 14.10. **HRMS (ESI)**  $m/z$  calculated for C<sub>32</sub>H<sub>31</sub>N<sub>3</sub>ONa [M+Na]<sup>+</sup>: 496.2359, found: 496.2362.

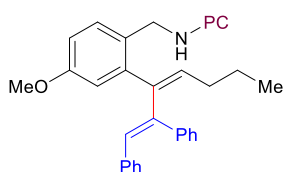

***N*-(2-((1*E*, 3*E*)-1,2-diphenyl hepta-1,3-dien-3-yl)-4-methoxybenzyl)pyrazine-2-carboxamide (3j)** Following the **General Procedure 1**, **3j** was obtained as a light yellow oil (55.9 mg, 76% yield,  $E/Z=99:1$ ). **<sup>1</sup>H NMR** (500 MHz, CDCl<sub>3</sub>) δ 9.41 (d,  $J = 1.5$  Hz, 1H), 8.66 (d,  $J = 2.5$  Hz, 1H), 8.30 (t,  $J = 2.0$  Hz, 1H), 7.87 (s, 1H), 7.22 (d,  $J = 8.4$  Hz, 1H), 7.16 (q,  $J = 6.1$  Hz, 3H), 7.11-7.05 (m, 5H), 6.96 (dd,  $J = 6.4, 2.9$  Hz, 2H), 6.73-6.66 (m, 2H), 6.64 (s, 1H), 5.67 (t,  $J = 7.4$  Hz, 1H), 4.66 (d,  $J = 5.7$  Hz, 2H), 3.70 (s, 3H), 2.32 (q,  $J = 7.4$  Hz, 2H), 1.54-1.45 (m, 2H), 0.94 (t,  $J = 7.4$  Hz, 3H). **<sup>13</sup>C NMR** (125 MHz, CDCl<sub>3</sub>) δ 162.46, 158.55, 147.02, 144.60, 144.32, 143.67, 142.39, 142.35, 140.68, 139.14, 136.63, 134.95, 130.99, 130.60, 129.48, 129.24, 128.42, 127.87, 127.65, 127.22, 126.88, 116.34, 112.74, 55.23, 41.03, 31.63, 23.33, 14.07. **HRMS (ESI)**  $m/z$  calculated for C<sub>32</sub>H<sub>31</sub>N<sub>3</sub>O<sub>2</sub>Na [M+Na]<sup>+</sup>: 521.2308, found: 521.2316.

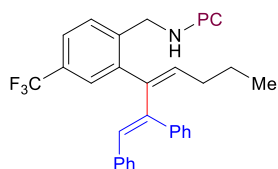

***N*-(2-((1*E*, 3*E*)-1,2-diphenyl hepta-1,3-dien-3-yl)-4-(trifluoromethyl)benzyl)-1-methylphosphanamine (3k)** Following the **General Procedure 1**, **3k** was obtained as a light yellow oil (66.5 mg, 84% yield,  $E/Z=95:5$ ). **<sup>1</sup>H NMR** (500 MHz, CDCl<sub>3</sub>) δ 9.42 (s, 1H), 8.70 (s, 1H), 8.35 (s, 1H), 7.97 (s, 1H), 7.39 (dd,  $J = 19.2, 7.2$  Hz, 3H), 7.17 (d,  $J = 6.2$  Hz, 3H), 7.13 – 7.08 (m, 3H), 7.06 (dd,  $J = 7.3, 2.1$  Hz, 2H), 7.03 – 6.98 (m, 2H), 6.69 (s, 1H), 5.70 (t,  $J = 7.4$  Hz, 1H), 4.77 (d,  $J = 6.1$  Hz, 2H), 2.38 (q,  $J = 7.4$  Hz, 2H), 1.59 – 1.49 (m, 2H), 0.97 (t,  $J = 7.4$  Hz, 3H). **<sup>13</sup>C NMR** (125 MHz, CDCl<sub>3</sub>) δ 162.82, 147.32, 144.43, 144.26, 142.71, 142.44, 141.40, 140.12, 139.52, 138.73, 136.32, 136.03, 131.47, 129.53, 129.19,

129.11, 128.58, 127.99, 127.55 (q,  $J_{CF} = 3.6$  Hz), 127.47, 127.16, 124.09 (q,  $J_{CF} = 3.6$  Hz), 123.97 (d,  $J_{CF} = 272.3$  Hz), 40.93, 31.69, 23.29, 14.10. **<sup>19</sup>F NMR** (471 MHz, CDCl<sub>3</sub>)  $\delta$  -62.56. **HRMS (ESI)**  $m/z$  calculated for C<sub>32</sub>H<sub>28</sub>F<sub>3</sub>N<sub>3</sub>ONa [M+Na]<sup>+</sup>: 550.2077, found: 550.2078.

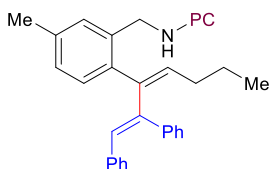

***N*-(2-((1*E*, 3*E*)-1,2-Diphenyl hepta-1,3-dien-3-yl)-5-methyl benzyl) pyrazine-2-carboxamide (3l)** Following the **General Procedure 1**, **3l** was obtained as a light yellow oil (66.2 mg, 93% yield, *E/Z*=90:10). **<sup>1</sup>H NMR** (500 MHz, CDCl<sub>3</sub>)  $\delta$  9.42 (d,  $J = 1.5$  Hz, 1H), 8.67 (d,  $J = 2.5$  Hz, 1H), 8.32 (dd,  $J = 2.4, 1.5$  Hz, 1H), 7.91 (s, 1H), 7.15 (q,  $J = 5.5$  Hz, 3H), 7.11-7.03 (m, 7H), 6.99-6.93 (m, 3H), 6.64 (s, 1H), 5.64 (t,  $J = 7.4$  Hz, 1H), 4.69 (d,  $J = 5.8$  Hz, 2H), 2.32 (q,  $J = 7.3$  Hz, 2H), 2.25 (s, 3H), 1.53-1.45 (m, 2H), 0.94 (t,  $J = 7.3$  Hz, 3H). **<sup>13</sup>C NMR** (125 MHz, CDCl<sub>3</sub>)  $\delta$  162.52, 147.06, 144.60, 144.39, 142.38, 142.36, 141.01, 139.39, 139.22, 137.08, 136.73, 135.08, 134.92, 130.82, 130.79, 129.88, 129.48, 129.24, 128.37, 128.12, 127.87, 127.15, 126.82, 41.48, 31.68, 23.37, 21.06, 14.08. **HRMS (ESI)**  $m/z$  calculated for C<sub>32</sub>H<sub>31</sub>N<sub>3</sub>ONa [M+Na]<sup>+</sup>: 496.2359, found: 496.2354.

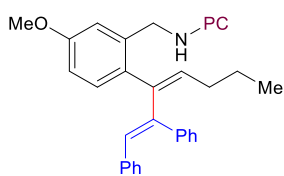

***N*-(2-((1*E*,3*E*)-1,2-Diphenylhepta-1,3-dien-3-yl)-5-methoxy benzyl) pyrazine-2-carboxamide (3m)** Following the **General Procedure 1**, **3m** was obtained as a yellow oil (89.2 mg, 74% yield, *E/Z*=93:7). **<sup>1</sup>H NMR** (500 MHz, CDCl<sub>3</sub>)  $\delta$  9.41 (d,  $J = 1.4$  Hz, 1H), 8.66 (d,  $J = 2.4$  Hz, 1H), 8.32 (dd,  $J = 2.3, 1.5$  Hz, 1H), 7.94 (s, 1H), 7.20-7.11 (m, 3H), 7.10-7.04 (m, 6H), 6.98 (dd,  $J = 6.8, 2.8$  Hz, 2H), 6.83 (d,  $J = 2.7$  Hz, 1H), 6.69 (dd,  $J = 8.5, 2.7$  Hz, 1H), 6.65 (s, 1H), 5.63 (d,  $J = 7.4$  Hz, 1H), 4.70 (d,  $J = 5.8$  Hz, 2H), 3.71 (s, 3H), 2.34 (q,  $J = 7.3$  Hz, 2H), 1.55 – 1.45 (m, 2H), 0.95 (t,  $J = 7.4$  Hz, 3H). **<sup>13</sup>C NMR** (125 MHz, CDCl<sub>3</sub>)  $\delta$  162.62, 158.68, 147.11, 144.53, 144.35, 142.44, 142.11, 141.10, 139.26, 136.73, 136.67, 134.92, 134.64, 131.99, 130.72, 129.47, 129.21, 128.40, 127.90, 127.16, 126.84, 114.21, 112.79, 55.20, 41.60, 31.73, 23.41, 14.11. **HRMS (ESI)**  $m/z$  calculated for C<sub>32</sub>H<sub>31</sub>N<sub>3</sub>O<sub>2</sub>Na [M+Na]<sup>+</sup>: 512.2308, found: 512.2302.

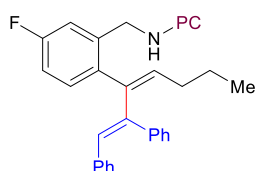

***N*-(2-((1*E*, 3*E*)-1,2-Diphenylhepta-1,3-dien-3-yl)-5-fluorobenzyl) pyrazine-2-carboxamide (3n)** Following the **General Procedure 1**, **3n** was obtained as a yellow oil (78.6 mg, 69% yield, *E/Z*=97:3). **<sup>1</sup>H NMR** (500 MHz, CDCl<sub>3</sub>)  $\delta$  9.42 (d,  $J = 1.5$  Hz, 1H), 8.69 (d,  $J = 2.5$  Hz, 1H), 8.36 (dd,  $J = 2.5, 1.5$  Hz, 1H), 7.97 (s, 1H), 7.20-7.14 (m, 3H), 7.12-7.05 (m, 6H), 6.99 (dt,  $J = 6.1, 2.4$  Hz, 3H), 6.82 (td,  $J = 8.4, 2.7$  Hz, 1H), 6.66 (s, 1H), 5.65 (t,  $J = 7.4$  Hz, 1H), 4.71 (d,  $J = 6.0$  Hz, 2H), 2.37 (q,  $J = 7.3$  Hz, 2H), 1.58 – 1.47 (m, 2H), 0.96 (t,  $J = 7.4$  Hz, 3H). **<sup>13</sup>C NMR** (125 MHz, CDCl<sub>3</sub>)  $\delta$  162.78, 161.80 (d,  $J_{CF} = 244.5$  Hz), 147.27, 144.43, 144.34, 142.45, 141.61, 140.65, 139.03, 137.88 (d,  $J_{CF} = 3.2$  Hz), 137.78 (d,  $J_{CF} = 7.1$  Hz),

136.51, 135.39, 132.40 (d,  $J_{CF} = 7.9$  Hz), 131.02, 129.48, 129.14, 128.49, 127.95, 127.31, 127.01, 115.25 (d,  $J_{CF} = 21.8$  Hz), 114.09 (d,  $J_{CF} = 20.9$  Hz), 41.09, 31.69, 23.35, 14.10. **<sup>19</sup>F NMR** (471 MHz, CDCl<sub>3</sub>)  $\delta$  -114.86. **HRMS (ESI)**  $m/z$  calculated for C<sub>31</sub>H<sub>28</sub>FN<sub>3</sub>ONa [M+Na]<sup>+</sup>: 500.2109, found: 500.2110.

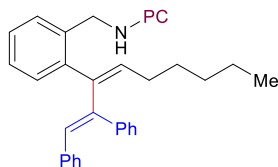

***N*-(2-((1*E*,3*E*)-1,2-Diphenylnona-1,3-dien-3-yl)benzyl)pyrazine-2-carboxamide (3o)** Following the **General Procedure 1**, **3o** was obtained as a light yellow oil (59.7 mg, 82% yield, *E/Z*=93:7). **<sup>1</sup>H NMR** (500 MHz, CDCl<sub>3</sub>)  $\delta$  9.42 (d,  $J = 1.5$  Hz, 1H), 8.68 (d,  $J = 2.5$  Hz, 1H), 8.33 (t,  $J = 2.0$  Hz, 1H), 7.92 (s, 1H), 7.31-7.28 (m, 1H), 7.19-7.13 (m, 6H), 7.11-7.05 (m, 5H), 6.99-6.93 (m, 2H), 6.64 (s, 1H), 5.66 (t,  $J = 7.4$  Hz, 1H), 4.72 (d,  $J = 5.8$  Hz, 2H), 2.33 (q,  $J = 7.4$  Hz, 2H), 1.51 – 1.41 (m, 2H), 1.35-1.27 (m, 4H), 0.87 (t,  $J = 7.0$  Hz, 3H). **<sup>13</sup>C NMR** (125 MHz, CDCl<sub>3</sub>)  $\delta$  147.08, 144.54, 144.40, 142.36, 142.29, 142.18, 140.86, 139.17, 136.67, 135.35, 135.28, 130.98, 130.88, 129.46, 129.22, 129.12, 128.38, 127.87, 127.40, 127.31, 127.18, 126.84, 41.48, 31.67, 29.84, 29.59, 22.53, 14.03. **HRMS (ESI)**  $m/z$  calculated for C<sub>33</sub>H<sub>33</sub>N<sub>3</sub>ONa [M+Na]<sup>+</sup>: 510.2516, found: 510.2509.

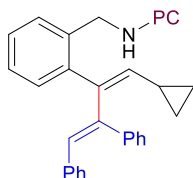

***N*-(2-((1*E*,3*E*)-1-cyclopropyl-3,4-diphenylbuta-1,3-dien-2-yl)benzyl)pyrazine-2-carboxamide (3p)**. Following the general procedure 1, **3p** was obtained as a yellow liquid (21.8 mg, 32% yield, *E/Z* = 99:1). **<sup>1</sup>H NMR** (500 MHz, CDCl<sub>3</sub>)  $\delta$  9.42 (d,  $J = 1.5$  Hz, 1H), 8.68 (d,  $J = 2.4$  Hz, 1H), 8.32 (dd,  $J = 2.5, 1.5$  Hz, 1H), 7.99 – 7.93 (m, 1H), 7.29 (ddd,  $J = 5.4, 3.4, 2.1$  Hz, 1H), 7.17 (ddt,  $J = 9.3, 5.6, 2.9$  Hz, 9H), 7.08 – 7.05 (m, 3H), 6.97 (dd,  $J = 6.8, 3.0$  Hz, 2H), 6.76 (s, 1H), 5.00 (d,  $J = 10.1$  Hz, 1H), 1.73 (dddd,  $J = 12.8, 9.7, 8.1, 4.7$  Hz, 1H), 0.77 – 0.69 (m, 2H), 0.49 – 0.41 (m, 2H). **<sup>13</sup>C NMR** (126 MHz, CDCl<sub>3</sub>)  $\delta$  162.56, 147.10, 144.54, 144.41, 142.36, 142.33, 141.23, 140.35, 139.62, 139.33, 136.86, 135.46, 131.29, 130.97, 129.48, 129.45, 129.14, 128.40, 127.86, 127.39, 127.38, 127.21, 126.77, 41.52, 12.13, 8.13. **HRMS (ESI)** for C<sub>31</sub>H<sub>27</sub>N<sub>3</sub>O [M+Na]<sup>+</sup>: 480.2046, found: 480.2048. **FTIR** (KBr, cm<sup>-1</sup>) 3433.64, 2962.62, 2828.04, 2715.89, 1611.21, 1358.88, 1064.49, 767.29

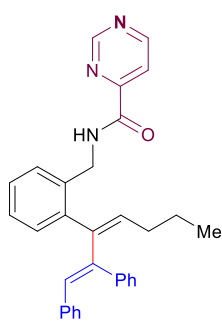

***N*-(2-((1*E*, 3*E*)-1,2-Diphenyl hepta-1,3-dien-3-yl)benzyl)pyrimidine-4-carboxamide** Following the **General Procedure 1**, This compound was obtained as a light yellow oil (61.1 mg, 89% yield, *E/Z*=91:9). **<sup>1</sup>H NMR** (500 MHz, CDCl<sub>3</sub>)  $\delta$  9.05 (d,  $J = 1.4$  Hz, 1H), 8.94 (d,  $J = 5.0$  Hz, 1H), 8.13 (dd,  $J = 5.0, 1.5$  Hz, 2H), 7.31-7.25 (m, 1H), 7.19-7.12 (m, 6H), 7.11-7.04 (m, 5H), 7.01-6.95 (m, 2H), 6.65 (s, 1H), 5.67 (t,  $J = 7.4$  Hz, 1H), 4.72 (d,  $J = 5.8$  Hz, 2H), 2.34 (q,  $J = 7.3$  Hz, 2H), 1.55-1.46 (m, 2H), 0.95 (t,  $J = 7.4$  Hz, 3H). **<sup>13</sup>C NMR** (125 MHz, CDCl<sub>3</sub>)  $\delta$  162.20, 159.10, 157.59, 156.31, 142.44, 142.25, 140.79, 139.12, 136.63, 135.12, 135.07, 130.99, 130.92, 129.48, 129.19, 129.07, 128.41,

127.90, 127.44, 127.38, 127.23, 126.93, 118.54, 41.62, 31.67, 23.35, 14.08. **HRMS (ESI)**  $m/z$  calculated for  $C_{31}H_{29}N_3ONa$   $[M+Na]^+$ : 482.2203, found: 482.2201.

#### Unsuccessful substrates:

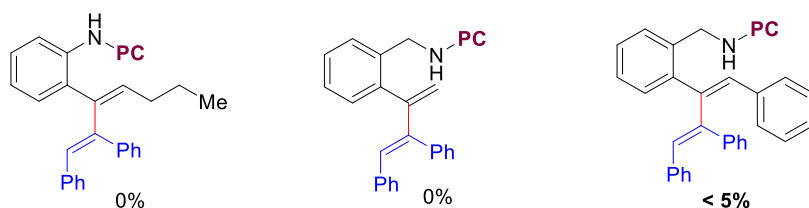

### 3.3 General Procedure 2 for Cross-Coupling-2 between Dienes and Alkenes

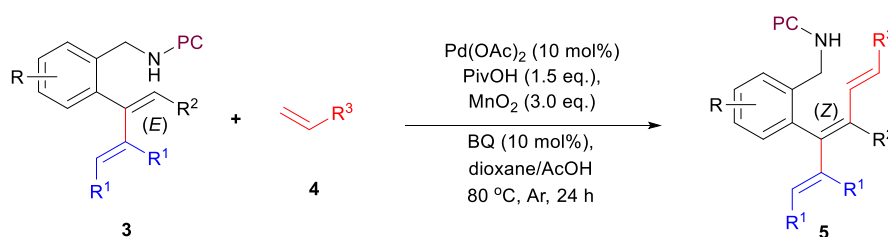

A screw-cap vial was charged with  $Pd(OAc)_2$  (10 mol%, 0.015 mmol),  $MnO_2$  (3.0 equiv, 0.45 mmol), BQ (10 mol%, 0.015 mmol), amide **3** (1.0 equiv, 0.15 mmol), olefin **2** (2.5 equiv, 0.38 mmol) and 1,4-dioxane/AcOH (0.1 M, 10: 1). Then, pivalic acid (1.5 equiv, 0.23 mmol) were added into the solution in sequence. The vial was sealed under argon atmosphere and heated to 80 °C with stirring for 24 h. After cooling down, the mixture was concentrated and directly applied to a flash column chromatography (PE/EA mixtures) for separation to obtain the corresponding product **5**.

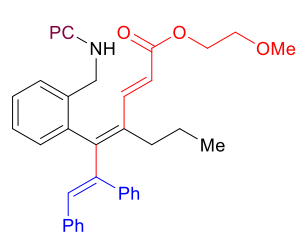

**2-Methoxyethyl (2E, 4Z, 6E)-6,7-diphenyl-4-propyl-5-(2-((pyrazine-2-carboxamido) methyl) phenyl) hepta-2,4,6-trienoate (5a)** Following the **General Procedure 2**, **5a** was

obtained as a yellow oil (53.8 mg, 61% yield,  $Z/E > 99:1$ ). **<sup>1</sup>H NMR** (500 MHz,  $CDCl_3$ )  $\delta$  9.38 (d,  $J = 1.5$  Hz, 1H), 8.67 (d,  $J = 2.4$  Hz, 1H), 8.34 (dd,  $J = 2.5, 1.5$  Hz, 1H), 7.69 (s, 1H),

7.33 (d,  $J = 7.3$  Hz, 1H), 7.25-7.19 (m, 1H), 7.19-7.14 (m, 4H), 7.10 (dd,  $J = 8.7, 7.0$  Hz, 4H), 6.99 – 6.91 (m, 5H), 6.78 (s, 1H), 6.03 (d,  $J = 15.9$  Hz, 1H), 4.57 (dd,  $J = 14.6, 6.4$  Hz, 1H), 4.33 (dd,  $J = 14.6, 5.3$  Hz, 1H), 4.19-4.12 (m, 2H), 3.53 (dd,  $J = 5.6, 4.0$  Hz, 2H), 3.31 (s, 3H), 2.73-2.65 (m, 2H), 1.67-1.57 (m, 2H), 0.97 (t,  $J = 7.3$  Hz, 3H). **<sup>13</sup>C NMR** (125 MHz,  $CDCl_3$ )  $\delta$  166.91, 162.57, 149.66, 147.06, 144.43, 144.33, 144.25, 142.35, 141.97, 138.57, 138.40, 136.78, 136.11, 136.02, 131.15, 130.70, 129.53, 129.25, 129.08, 128.57, 128.34, 128.00, 127.51, 127.41, 127.33, 118.96, 70.41, 63.55, 59.06, 41.01, 32.06, 23.61, 14.81. **HRMS (ESI)**  $m/z$  calculated for  $C_{37}H_{37}N_3O_4Na$   $[M+Na]^+$ :

610.2676, found: 610.2672.

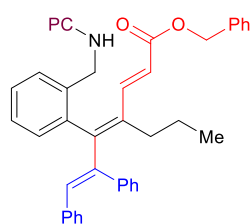

**Benzyl (2E, 4Z, 6E)-6,7-diphenyl-4-propyl-5-(2-((pyrazine-2-carboxamido) methyl) phenyl) hepta-2,4,6-trienoate (5b)**

Following the **General Procedure 2**, **5b** was obtained as a yellow oil (45.7 mg, 49% yield, *Z/E* =95:5). **<sup>1</sup>H NMR** (500 MHz, CDCl<sub>3</sub>) δ 9.34 (s, 1H), 8.60 (s, 1H), 8.22 (s, 1H), 7.70 (s, 1H), 7.36 (d, *J* = 7.5 Hz, 1H), 7.30 (d, *J* = 7.2 Hz, 3H), 7.25 (d, *J* = 4.4 Hz, 1H), 7.21-7.13 (m, 7H), 7.12-7.06 (m, 3H), 6.96 (dd, *J* = 7.6, 4.8 Hz, 5H), 6.79 (s, 1H), 6.00 (d, *J* = 15.9 Hz, 1H), 5.04 (s, 2H), 4.56 (dd, *J* = 14.5, 6.3 Hz, 1H), 4.35 (dd, *J* = 14.5, 5.5 Hz, 1H), 2.70 (t, *J* = 8.2 Hz, 2H), 1.67-1.53 (m, 2H), 0.96 (t, *J* = 7.3 Hz, 3H). **<sup>13</sup>C NMR** (125 MHz, CDCl<sub>3</sub>) δ 166.66, 162.52, 149.82, 146.99, 144.39, 144.27, 142.30, 141.92, 138.57, 138.52, 136.77, 136.15, 136.02, 135.99, 131.26, 130.68, 129.54, 129.40, 129.10, 128.59, 128.49, 128.36, 128.05, 128.01, 127.78, 127.53, 127.48, 127.35, 118.94, 65.91, 41.04, 31.99, 23.59, 14.80. **HRMS (ESI)** *m/z* calculated for C<sub>41</sub>H<sub>37</sub>N<sub>3</sub>O<sub>3</sub>Na [M+Na]<sup>+</sup>: 642.2727, found: 642.2724.

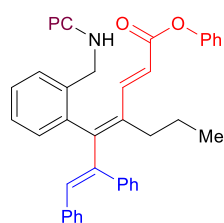

**Phenyl (2E, 4Z, 6E)-6,7-diphenyl-4-propyl-5-(2-((pyrazine-2-carboxamido) methyl) phenyl) hepta-2,4,6-trienoate (5c)**

Following the **General Procedure 2**, **5c** was obtained as a green oil (45.4 mg, 50% yield, *Z/E* =96:4). **<sup>1</sup>H NMR** (500 MHz, CDCl<sub>3</sub>) δ 9.39 (s, 1H), 8.63 (d, *J* = 2.0 Hz, 1H), 8.25 (s, 1H), 7.73 (s, 1H), 7.36-7.30 (m, 3H), 7.29 (d, *J* = 12.1 Hz, 1H), 7.23-7.14 (m, 6H), 7.12-7.07 (m, 3H), 7.04-6.94 (m, 7H), 6.82 (s, 1H), 6.15 (d, *J* = 15.9 Hz, 1H), 4.58 (dd, *J* = 14.6, 6.3 Hz, 1H), 4.37 (dd, *J* = 14.6, 5.4 Hz, 1H), 2.76 (t, *J* = 8.2 Hz, 2H), 1.77-1.58 (m, 2H), 1.01 (t, *J* = 7.3 Hz, 3H). **<sup>13</sup>C NMR** (125 MHz, CDCl<sub>3</sub>) δ 165.31, 162.60, 150.75, 150.56, 147.09, 145.65, 144.38, 144.31, 142.40, 141.96, 138.52, 138.33, 136.74, 136.11, 135.98, 131.38, 130.62, 129.57, 129.29, 129.25, 129.11, 128.63, 128.53, 128.05, 127.60, 127.50, 127.43, 125.58, 121.44, 118.44, 41.03, 32.10, 23.63, 14.86. **HRMS (ESI)** *m/z* calculated for C<sub>40</sub>H<sub>35</sub>N<sub>3</sub>O<sub>3</sub>Na [M+Na]<sup>+</sup>: 628.2571, found: 628.2575.

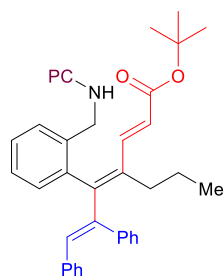

**Tert-butyl (2E, 4Z, 6E)-6,7-diphenyl-4-propyl-5-(2-((pyrazine-2-carboxamido) methyl) phenyl) hepta-2,4,6-trienoate (5d)**

Following the **General Procedure 2**, **5d** was obtained as a yellow oil (55.1 mg, 63% yield, *Z/E* =98:2). **<sup>1</sup>H NMR** (500 MHz, CDCl<sub>3</sub>) δ 9.39 (s, 1H), 8.67 (d, *J* = 2.3 Hz, 1H), 8.34 (s, 1H), 7.69 (s, 1H), 7.33 (d, *J* = 7.4 Hz, 1H), 7.21 (t, *J* = 7.0 Hz, 1H), 7.18-7.12 (m, 4H), 7.08 (dt, *J* = 6.2, 3.0 Hz, 3H), 7.01-6.93 (m, 6H), 6.78 (s, 1H), 5.89 (d, *J* = 15.9 Hz, 1H), 4.59 (dd, *J* = 14.6, 6.4 Hz, 1H), 4.34 (dd, *J* = 14.6, 5.3 Hz, 1H), 2.77-2.63 (m, 2H), 1.68-1.58 (m, 2H), 1.36 (s, 9H), 0.98 (t, *J* = 7.3 Hz, 3H). **<sup>13</sup>C NMR** (125 MHz, CDCl<sub>3</sub>) δ 166.33, 162.59, 148.75, 147.03, 144.48, 144.34, 142.71, 142.36,

142.08, 138.67, 138.53, 136.81, 136.12, 136.07, 130.97, 130.69, 129.51, 129.12, 129.10, 128.53, 128.24, 127.98, 127.47, 127.36, 127.26, 121.29, 80.11, 41.00, 32.03, 28.07, 23.67, 14.84. **HRMS (ESI)**  $m/z$  calculated for  $C_{38}H_{39}N_3O_3Na$   $[M+Na]^+$ : 608.2884, found: 608.2891.

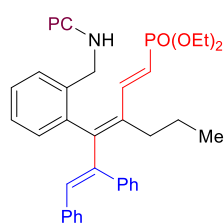

**Diethyl ((1E,3Z,5E)-5,6-diphenyl-3-propyl-4-(2-((pyrazine-2-carboxamido) methyl) phenyl) hexa-1,3,5-trien-1-yl) phosphonate (5e)** Following the **General Procedure 2**, **5e** was obtained as a yellow oil (43.1 mg, 46% yield,  $Z/E >99:1$ ). **<sup>1</sup>H NMR** (500 MHz,  $CDCl_3$ )  $\delta$  9.39 (s, 1H), 8.68 (d,  $J = 2.3$  Hz, 1H), 8.45-8.32 (m, 1H), 7.71 (t,  $J = 4.9$  Hz, 1H), 7.32 (d,  $J = 7.2$  Hz, 1H), 7.22-7.15 (m, 4H), 7.14-7.06 (m, 4H), 7.00-6.88 (m, 5H), 6.82-6.72 (m, 2H), 5.84 (dd,  $J = 19.2, 17.6$  Hz, 1H), 4.66 (dd,  $J = 14.7, 6.6$  Hz, 1H), 4.34 (dd,  $J = 14.7, 5.1$  Hz, 1H), 4.01-3.88 (m, 4H), 2.79-2.64 (m, 2H), 1.67-1.57 (m, 2H), 1.17 (q,  $J = 7.2$  Hz, 6H), 0.97 (t,  $J = 7.3$  Hz, 3H). **<sup>13</sup>C NMR** (125 MHz,  $CDCl_3$ )  $\delta$  162.66, 148.45, 147.12, 146.35 (d,  $J_{CP} = 6.7$  Hz), 144.37, 144.28, 142.46, 141.82 (d,  $J_{CP} = 2.2$  Hz), 138.55, 138.25, 137.18, 137.00, 136.00 (d,  $J_{CP} = 2.1$  Hz), 131.00 (d,  $J_{CP} = 5.7$  Hz), 129.52, 129.07, 129.00, 128.55, 128.28, 127.99, 127.52, 127.37, 127.32, 116.31, 114.79, 61.80 (dd,  $J_{CP} = 8.3, 5.8$  Hz), 40.96, 31.72, 23.53, 16.23 (d,  $J_{CP} = 6.6$  Hz), 14.81. **<sup>31</sup>P NMR** (202 MHz,  $CDCl_3$ )  $\delta$  19.44. **HRMS (ESI)**  $m/z$  calculated for  $C_{37}H_{40}N_3O_4PNa$   $[M+Na]^+$ : 644.2649, found: 644.2651.

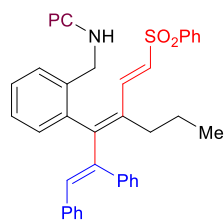

**N-(2-((1E, 3Z)-1,2-diphenyl-4-((E)-2-(phenyl sulfonyl) vinyl) hepta-1,3-dien-3-yl)benzyl)pyrazine-2-carboxamide (5f)** Following the **General Procedure 2**, **5f** was obtained as a yellow solid (49.7 mg, 53% yield,  $Z/E = 97:3$ , m.p. = 132.2 °C). **<sup>1</sup>H NMR** (500 MHz,  $CDCl_3$ )  $\delta$  9.39 (s, 1H), 8.69 (d,  $J = 2.1$  Hz, 1H), 8.40 (s, 1H), 7.75 (d,  $J = 7.5$  Hz, 2H), 7.72 (s, 1H), 7.57 (t,  $J = 7.4$  Hz, 1H), 7.48 (t,  $J = 7.7$  Hz, 2H), 7.32 (d,  $J = 7.6$  Hz, 1H), 7.24 (d,  $J = 7.2$  Hz, 1H), 7.18-7.13 (m, 4H), 7.12-7.05 (m, 3H), 6.99-6.90 (m, 5H), 6.88 (d,  $J = 7.5$  Hz, 1H), 6.78 (s, 1H), 6.41 (d,  $J = 15.4$  Hz, 1H), 4.62 (dd,  $J = 14.6, 6.6$  Hz, 1H), 4.28 (dd,  $J = 14.6, 5.0$  Hz, 1H), 2.69-2.52 (m, 2H), 1.58-1.47 (m, 2H), 0.90 (t,  $J = 7.3$  Hz, 3H). **<sup>13</sup>C NMR** (125 MHz,  $CDCl_3$ )  $\delta$  162.66, 151.58, 147.23, 144.28, 144.25, 142.59, 141.63, 141.29, 140.60, 138.28, 137.79, 135.83, 135.76, 135.11, 133.25, 131.78, 130.93, 129.57, 129.26, 129.04, 128.74, 128.73, 128.63, 128.04, 127.65, 127.56, 127.53, 127.52, 41.01, 32.26, 23.25, 14.71. **HRMS (ESI)**  $m/z$  calculated for  $C_{39}H_{35}N_3O_3SNa$   $[M+Na]^+$ : 648.2291, found: 648.2296.



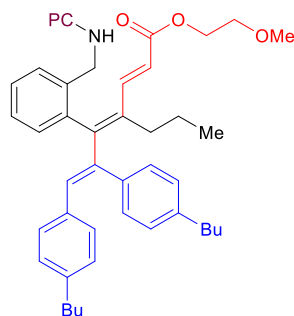

**2-Methoxy ethyl (2E, 4Z, 6E)-6,7-bis (4-butylphenyl)-4-propyl-5-(2-((pyrazine-2-carboxamido) methyl) phenyl) hepta-2,4,6-trienoate (5g)**

Following the **General Procedure 2**, **5g** was obtained as a yellow oil (66.5 mg, 63% yield, *Z/E* >99:1). **<sup>1</sup>H NMR** (500 MHz, CDCl<sub>3</sub>) δ 9.38 (s, 1H), 8.68-8.64 (m, 1H), 8.31 (s, 1H), 7.74 (s, 1H), 7.33 (d, *J* = 7.5 Hz, 1H), 7.21 (t, *J* = 7.5 Hz, 1H), 7.13 (t, *J* = 7.5 Hz, 1H), 7.09 (d, *J* = 15.9 Hz, 1H), 6.99 (d, *J* = 7.9 Hz, 2H), 6.95 (d, *J* = 7.6 Hz, 1H), 6.91-6.83 (m, 6H), 6.70 (s, 1H), 6.01 (d, *J* = 15.9 Hz,

1H), 4.55 (dd, *J* = 14.6, 6.4 Hz, 1H), 4.34 (dd, *J* = 14.6, 5.4 Hz, 1H), 4.20-4.11 (m, 2H), 3.57-3.49 (m, 2H), 3.30 (s, 3H), 2.71-2.64 (m, 2H), 2.55-2.47 (m, 4H), 1.66-1.48 (m, 6H), 1.38-1.21 (m, 4H), 0.95 (t, *J* = 7.3 Hz, 3H), 0.92-0.86 (m, 6H). **<sup>13</sup>C NMR** (125 MHz, CDCl<sub>3</sub>) δ 166.95, 162.55, 150.19, 146.98, 144.51, 144.36, 142.34, 142.21, 142.08, 141.18, 138.76, 136.48, 136.09, 135.97, 133.53, 131.09, 130.73, 129.45, 129.17, 128.90, 128.59, 128.20, 128.01, 127.32, 118.60, 70.41, 63.52, 59.05, 41.07, 35.30, 33.41, 33.32, 31.98, 23.51, 22.34, 22.18, 14.79, 13.95, 13.93. **HRMS (ESI)** *m/z* calculated for C<sub>45</sub>H<sub>53</sub>N<sub>3</sub>O<sub>4</sub>Na [M+Na]<sup>+</sup>: 722.3928, found: 722.3927.

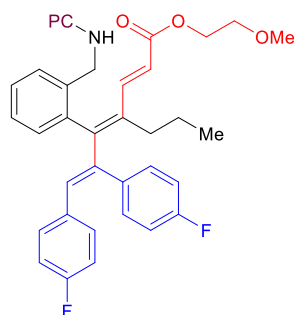

**2-Methoxyethyl (2E,4Z,6E)-6,7-bis (4-fluorophenyl)-4-propyl-5-(2-((pyrazine-2-carboxamido) methyl) phenyl) hepta-2,4,6-trienoate (5h)**

Following the **General Procedure 2**, **5h** was obtained as a yellow oil (53.4 mg, 57% yield, *Z/E* >99:1). **<sup>1</sup>H NMR** (500 MHz, CDCl<sub>3</sub>) δ 9.38 (s, 1H), 8.69 (d, *J* = 2.3 Hz, 1H), 8.38 (s, 1H), 7.59 (t, *J* = 5.2 Hz, 1H), 7.34 (d, *J* = 7.5 Hz, 1H), 7.23 (t, *J* = 7.4 Hz, 1H), 7.17 (t, *J* = 7.1 Hz, 1H), 7.08 (d, *J* = 15.9 Hz, 1H), 6.98-6.93 (m, 3H), 6.92-6.85 (m, 4H), 6.84-6.77 (m, 3H), 6.03 (d, *J* = 15.9 Hz,

1H), 4.61 (dd, *J* = 14.5, 6.7 Hz, 1H), 4.29 (dd, *J* = 14.6, 5.1 Hz, 1H), 4.18 (dd, *J* = 5.7, 3.5 Hz, 2H), 3.55 (dd, *J* = 5.7, 3.6 Hz, 2H), 3.33 (s, 3H), 2.68 (t, *J* = 8.3 Hz, 2H), 1.71-1.53 (m, 2H), 0.97 (t, *J* = 7.3 Hz, 3H). **<sup>13</sup>C NMR** (125 MHz, CDCl<sub>3</sub>) δ 166.82, 162.53, 162.12 (d, *J*<sub>CF</sub> = 247.6 Hz), 161.89 (d, *J*<sub>CF</sub> = 248.4 Hz), 148.98, 147.17, 144.31, 144.28, 143.91, 142.43, 140.54 (d, *J*<sub>CF</sub> = 1.53 Hz), 138.06, 136.97, 136.08, 134.27 (d, *J*<sub>CF</sub> = 3.5 Hz), 131.90 (d, *J*<sub>CF</sub> = 3.3 Hz), 131.12 (d, *J*<sub>CF</sub> = 8.0 Hz), 130.79 (d, *J*<sub>CF</sub> = 7.9 Hz), 130.57, 130.29, 129.33, 128.49, 127.54, 119.30, 115.82 (d, *J*<sub>CF</sub> = 21.4 Hz), 115.11 (d, *J*<sub>CF</sub> = 21.4 Hz), 70.40, 63.56, 59.04, 40.87, 32.09, 23.66, 14.80. **<sup>19</sup>F NMR** (471 MHz, CDCl<sub>3</sub>) δ -113.47, -113.50. **HRMS (ESI)** *m/z* calculated for C<sub>37</sub>H<sub>35</sub>F<sub>2</sub>N<sub>3</sub>O<sub>4</sub>Na [M+Na]<sup>+</sup>: 646.2488, found: 646.2493.

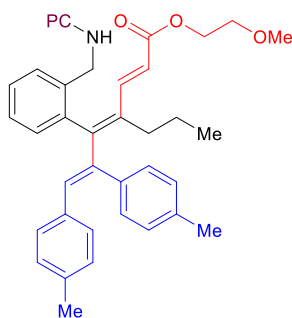

**2-Methoxyethyl (2E,4Z,6E)-4-propyl-5-(2-((pyrazine-2-carboxamido) methyl) phenyl)-6,7-di-p-tolylhepta-2,4,6-trienoate (5i)** Following the **General Procedure 2**, **5i** was obtained as a yellow oil (41.6 mg, 45% yield, *Z/E* =95:5). **<sup>1</sup>H NMR** (500 MHz, CDCl<sub>3</sub>) δ 9.38 (s, 1H), 8.67 (d, *J* = 2.2 Hz, 1H), 8.34 (s, 1H), 7.66 (t, *J* = 5.1 Hz, 1H), 7.32 (d, *J* = 7.5 Hz, 1H), 7.21 (t, *J* = 7.4 Hz, 1H), 7.15 (t, *J* = 7.4 Hz, 1H), 7.09 (d, *J* = 15.9 Hz, 1H), 6.98 (d, *J* = 7.7 Hz, 3H), 6.89 (q, *J* = 8.2 Hz, 4H), 6.82 (d, *J* = 7.8 Hz, 2H), 6.71 (s, 1H), 6.02 (d, *J* = 15.9

Hz, 1H), 4.56 (dd, *J* = 14.6, 6.5 Hz, 1H), 4.31 (dd, *J* = 14.6, 5.3 Hz, 1H), 4.19-4.13 (m, 2H), 3.56-3.50 (m, 2H), 3.31 (s, 3H), 2.72-2.65 (m, 2H), 2.25 (s, 3H), 2.24 (s, 3H), 1.68-1.54 (m, 2H), 0.96 (t, *J* = 7.3 Hz, 3H). **<sup>13</sup>C NMR** (125 MHz, CDCl<sub>3</sub>) δ 166.95, 162.57, 150.08, 147.00, 144.49, 144.39, 142.36, 141.12, 138.58, 137.16, 137.07, 136.53, 136.15, 135.62, 133.31, 130.79, 130.60, 129.43, 129.27, 129.17, 128.92, 128.72, 128.23, 127.35, 118.72, 70.42, 63.53, 59.06, 40.97, 32.05, 23.60, 21.27, 21.16, 14.81. **HRMS (ESI)** *m/z* calculated for C<sub>39</sub>H<sub>41</sub>N<sub>3</sub>O<sub>4</sub>Na [M+Na]<sup>+</sup>: 638.2989, found: 638.2987.

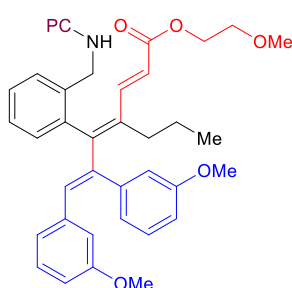

**2-Methoxyethyl (2E,4Z,6E)-6,7-bis(3-methoxy phenyl)-4-propyl-5-(2-((pyrazine-2-carboxamido) methyl) phenyl) hepta-2,4,6-trienoate (5j)** Following the **General Procedure 2**, **5j** was obtained as a yellow oil (66.1 mg, 68% yield, *Z/E* >99:1). **<sup>1</sup>H NMR** (500 MHz, CDCl<sub>3</sub>) δ 9.38 (s, 1H), 8.68 (s, 1H), 8.36 (s, 1H), 7.70 (s, 1H), 7.37 (d, *J* = 7.6 Hz, 1H), 7.25 (t, *J* = 7.4 Hz, 1H), 7.19 (t, *J* = 7.4 Hz, 1H), 7.15-7.09 (m, 2H), 7.05 (t, *J* = 7.9 Hz, 1H), 7.00 (d, *J* = 7.5 Hz, 1H), 6.78-

6.65 (m, 4H), 6.60 (d, *J* = 7.4 Hz, 1H), 6.52 (s, 1H), 6.46 (s, 1H), 6.05 (d, *J* = 15.9 Hz, 1H), 4.57 (dd, *J* = 14.5, 6.4 Hz, 1H), 4.34 (dd, *J* = 14.5, 5.2 Hz, 1H), 4.20-4.14 (m, 2H), 3.58 (s, 3H), 3.56-3.53 (m, 2H), 3.51 (s, 3H), 3.33 (s, 3H), 2.77-2.69 (m, 2H), 1.70-1.60 (m, 2H), 1.00 (t, *J* = 7.2 Hz, 3H). **<sup>13</sup>C NMR** (125 MHz, CDCl<sub>3</sub>) δ 166.86, 162.55, 159.65, 159.04, 149.42, 147.05, 144.42, 144.30, 144.19, 142.33, 141.90, 139.95, 138.34, 137.21, 136.73, 136.23, 131.00, 130.67, 129.63, 129.29, 128.98, 128.38, 127.45, 122.49, 121.40, 119.03, 114.24, 114.04, 113.72, 113.49, 70.39, 63.55, 59.05, 55.10, 54.81, 40.99, 32.03, 23.64, 14.80. **HRMS (ESI)** *m/z* calculated for C<sub>39</sub>H<sub>41</sub>N<sub>3</sub>O<sub>6</sub>Na [M+Na]<sup>+</sup>: 670.2888, found: 670.2885.

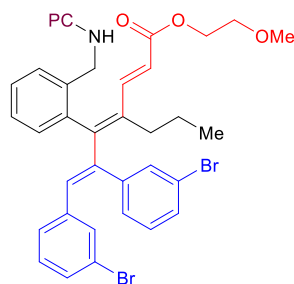

**2-Methoxyethyl (2E,4Z,6E)-6,7-bis(3-bromophenyl)-4-propyl-5-(2-((pyrazine-2-carboxamido) methyl) phenyl) hepta-2,4,6-trienoate (5k)** Following the **General Procedure 2**, **5k** was obtained as a yellow oil (47.4 mg, 43% yield, *Z/E* =95:5). **<sup>1</sup>H NMR** (500 MHz, CDCl<sub>3</sub>) δ 9.39 (d, *J* = 1.1 Hz, 1H), 8.69 (d, *J* = 2.4 Hz, 1H), 8.41-8.33 (m, 1H), 7.73 (s, 1H), 7.37 (d, *J* = 7.4 Hz, 1H), 7.32 (d, *J* = 8.8 Hz, 1H), 7.28-7.23 (m, 2H), 7.17 (t, *J* = 8.0 Hz, 1H), 7.14-7.11 (m, 2H), 7.10-7.03 (m, 2H), 6.95 (t, *J* = 7.9 Hz, 1H), 6.92-6.83 (m, 3H), 6.76 (s, 1H), 6.04 (d, *J* = 15.9 Hz, 1H), 4.60 (dd, *J* = 14.5, 6.4 Hz, 1H), 4.38 (dd, *J* = 14.5, 5.1 Hz, 1H), 4.18 (dd, *J* = 5.3, 3.9 Hz, 2H), 3.60-3.48 (m, 2H), 3.33 (s, 3H), 2.64 (dd, *J* = 10.8, 7.3 Hz, 2H), 1.72-1.52 (m, 2H), 0.96 (t, *J* = 7.3 Hz, 3H). **<sup>13</sup>C NMR** (125 MHz, CDCl<sub>3</sub>) δ 166.76, 162.52, 148.15, 147.19, 144.34, 144.27, 143.74, 142.41, 141.77, 140.14, 137.90, 137.77, 137.63, 135.91, 132.47, 131.87, 130.95, 130.90, 130.53, 130.52, 130.18, 129.60, 129.54, 128.66, 127.88, 127.83, 127.71, 122.57, 122.17, 119.61, 70.39, 63.59, 59.05, 41.18, 32.11, 23.63, 14.78. **HRMS (ESI)** *m/z* calculated for C<sub>37</sub>H<sub>35</sub>Br<sub>2</sub>N<sub>3</sub>O<sub>4</sub>Na [M+Na]<sup>+</sup>: 766.0887, found: 766.0888.

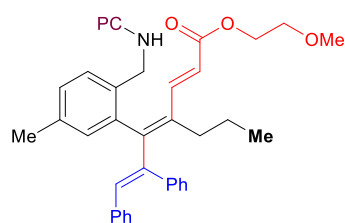

**2-Methoxyethyl (2E,4Z,6E)-5-(5-methyl-2-((pyrazine-2-carboxamido) methyl) phenyl)-6,7-diphenyl-4-propylhepta-2,4,6-trienoate (5l)** Following the **General Procedure 2**, **5l** was obtained as a yellow oil (49.1 mg, 54% yield, *Z/E* >99:1). **<sup>1</sup>H NMR** (500 MHz, CDCl<sub>3</sub>) δ 9.37 (s, 1H), 8.66 (d, *J* = 2.3 Hz, 1H), 8.41-8.26 (m, 1H), 7.60 (s, 1H), 7.23-7.15 (m, 4H), 7.14-7.06 (m, 4H), 7.03 (d, *J* = 7.7 Hz, 1H), 6.99-6.92 (m, 4H), 6.79 (s, 1H), 6.75 (s, 1H), 6.02 (d, *J* = 15.9 Hz, 1H), 4.47 (dd, *J* = 14.5, 6.4 Hz, 1H), 4.24 (dd, *J* = 14.5, 5.3 Hz, 1H), 4.19-4.12 (m, 2H), 3.57-3.50 (m, 2H), 3.31 (s, 3H), 2.68 (p, *J* = 7.5 Hz, 2H), 2.22 (s, 3H), 1.68-1.52 (m, 2H), 0.96 (t, *J* = 7.3 Hz, 3H). **<sup>13</sup>C NMR** (125 MHz, CDCl<sub>3</sub>) δ 166.94, 162.49, 149.83, 147.01, 144.50, 144.41, 144.32, 142.33, 142.14, 138.65, 138.27, 137.04, 136.54, 136.10, 133.22, 131.02, 130.89, 129.51, 129.19, 129.16, 129.08, 128.54, 128.00, 127.48, 127.29, 118.79, 70.42, 63.54, 59.05, 40.70, 32.06, 23.56, 21.00, 14.81. **HRMS (ESI)** *m/z* calculated for C<sub>38</sub>H<sub>39</sub>N<sub>3</sub>O<sub>4</sub>Na [M+Na]<sup>+</sup>: 624.2833, found: 624.2833.

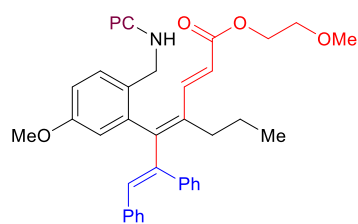

**2-Methoxyethyl (2E, 4Z, 6E)-5-(5-methoxy-2-((pyrazine-2-carboxamido) methyl) phenyl)-6,7-diphenyl-4-propylhepta-2,4,6-trienoate (5m)** Following the **General Procedure 2**, **5m** was obtained as a brown oil (58.4 mg, 63% yield, *Z/E* = 98:2). **<sup>1</sup>H NMR** (500 MHz, CDCl<sub>3</sub>) δ 9.37 (s, 1H), 8.66 (s, 1H), 8.32 (s, 1H), 7.63 (d, *J* = 5.1 Hz, 1H), 7.25 (s, 1H), 7.21-7.16 (m, 3H), 7.15-7.04 (m, 4H), 6.99-6.94 (m, 4H), 6.80-6.73 (m, 2H), 6.43 (d, *J* = 2.6 Hz, 1H), 6.02 (d, *J* = 15.9

Hz, 1H), 4.50 (dd,  $J = 14.5, 6.4$  Hz, 1H), 4.27 (dd,  $J = 14.5, 5.2$  Hz, 1H), 4.17 (dd,  $J = 5.7, 3.2$  Hz, 2H), 3.64 (s, 3H), 3.54 (dd,  $J = 5.3, 3.5$  Hz, 2H), 3.32 (s, 3H), 2.76-2.62 (m, 2H), 1.69-1.55 (m, 2H), 0.97 (t,  $J = 7.3$  Hz, 3H). **<sup>13</sup>C NMR** (125 MHz, CDCl<sub>3</sub>)  $\delta$  166.87, 162.45, 158.51, 149.43, 147.00, 144.49, 144.30, 144.22, 142.32, 141.83, 139.72, 138.59, 136.64, 136.01, 131.03, 130.72, 129.52, 129.13, 128.58, 128.36, 127.98, 127.53, 127.32, 119.02, 115.61, 114.13, 70.41, 63.55, 59.05, 55.21, 40.51, 32.02, 23.62. **HRMS (ESI)**  $m/z$  calculated for C<sub>38</sub>H<sub>39</sub>N<sub>3</sub>O<sub>5</sub>Na [M+Na]<sup>+</sup>: 640.2782, found: 640.2788.

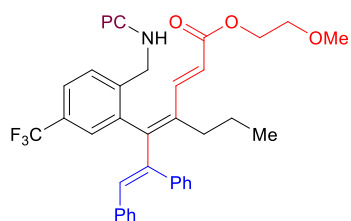

**2-Methoxyethyl (2E, 4Z, 6E)-6,7-diphenyl-5-(2-((phosphaneyl methyl) amino) methyl)-5-(trifluoromethyl) phenyl)-4-propyl hepta-2,4,6-trienoate (5n)** Following the **General Procedure 2**, **5n** was obtained as a brown oil (62.4 mg, 63% yield,  $Z/E > 99:1$ ). **<sup>1</sup>H NMR** (500 MHz, CDCl<sub>3</sub>)  $\delta$  9.38 (s, 1H), 8.70 (d,  $J = 2.2$  Hz, 1H), 8.37 (s, 1H), 7.73 (s, 1H), 7.48 (s, 2H), 7.22 – 7.18 (m, 4H), 7.15 – 7.09 (m, 3H), 7.05 – 6.97 (m, 3H), 6.92 (dd,  $J = 6.5, 2.9$  Hz, 2H), 6.84 (s, 1H), 6.09 (d,  $J = 15.9$  Hz, 1H), 4.64 – 4.56 (m, 1H), 4.35 (dd,  $J = 14.9, 5.5$  Hz, 1H), 4.24 – 4.11 (m, 2H), 3.53 (t,  $J = 4.6$  Hz, 2H), 3.31 (s, 3H), 2.83 – 2.71 (m, 2H), 1.74 – 1.61 (m, 2H), 1.00 (t,  $J = 7.3$  Hz, 3H). **<sup>13</sup>C NMR** (125 MHz, CDCl<sub>3</sub>)  $\delta$

165.60, 161.76, 146.71, 146.26, 143.35, 143.12, 142.23, 141.37, 140.30, 139.32, 137.99, 137.15, 136.46, 134.66, 130.50, 128.55 (d,  $J_{CF} = 32.6$  Hz), 128.55, 128.50, 127.95, 127.74, 127.07, 126.76, 126.59, 126.19 (q,  $J_{CF} = 3.7$  Hz), 123.94 (d,  $J_{CF} = 3.6$  Hz), 122.70 (d,  $J_{CF} = 272.4$  Hz), 119.01, 69.32, 62.61, 57.96, 39.41, 31.03, 22.66, 13.78. **<sup>19</sup>F NMR** (471 MHz, CDCl<sub>3</sub>)  $\delta$  -62.65. **HRMS (ESI)**  $m/z$  calculated for C<sub>38</sub>H<sub>36</sub>F<sub>3</sub>N<sub>3</sub>O<sub>4</sub>Na [M+Na]<sup>+</sup>: 678.2550, found: 678.2551.

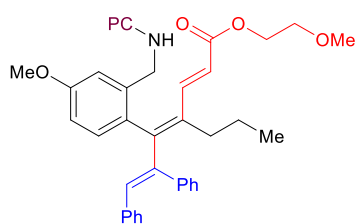

**2-Methoxyethyl (2E, 4Z, 6E)-5-(4-methoxy-2-((pyrazine-2-carboxamido) methyl) phenyl)-6,7-diphenyl-4-propylhepta-2,4,6-trienoate (5o)**

Following the **General Procedure 2**, **5o** was obtained as a yellow oil (44.8 mg, 48% yield,  $Z/E = 93:7$ ). **<sup>1</sup>H NMR** (500 MHz, CDCl<sub>3</sub>)  $\delta$  9.37 (s, 1H), 8.69-8.66 (m, 1H), 8.38-8.34 (m, 1H), 7.68 (s, 1H), 7.20-7.13 (m, 4H), 7.12-7.06 (m, 3H), 6.99-6.93 (m, 4H), 6.89 (d,  $J = 8.5$  Hz, 1H), 6.86 (d,  $J = 2.6$  Hz, 1H), 6.75 (s, 1H), 6.70 (dd,  $J = 8.5, 2.7$  Hz, 1H), 6.03 (d,  $J = 15.9$  Hz, 1H), 4.52 (dd,  $J = 14.6, 6.5$  Hz, 1H), 4.28 (dd,  $J = 14.6, 5.4$  Hz, 1H), 4.18 (dd,  $J = 5.9, 3.4$  Hz, 2H), 3.74 (s, 3H), 3.55 (dd,  $J = 5.9, 4.0$  Hz, 2H), 3.33 (s, 3H), 2.73-2.65 (m, 2H), 1.68-1.53 (m, 2H), 0.96 (t,  $J = 7.3$  Hz, 3H). **<sup>13</sup>C NMR** (125 MHz, CDCl<sub>3</sub>)  $\delta$  167.03, 162.57, 159.34, 149.62, 147.06, 144.46, 144.42, 144.33, 142.34, 142.30, 138.71, 137.64, 137.03, 136.10, 131.91, 130.83, 130.57, 129.50, 129.06, 128.56, 127.99, 127.45, 127.27, 118.73, 114.26, 113.17, 70.45, 63.53, 59.04, 55.18, 41.12, 32.21, 23.60, 14.81. **HRMS (ESI)**  $m/z$  calculated for

C<sub>38</sub>H<sub>39</sub>N<sub>3</sub>O<sub>5</sub>Na [M+Na]<sup>+</sup>: 640.2782, found: 640.2782.

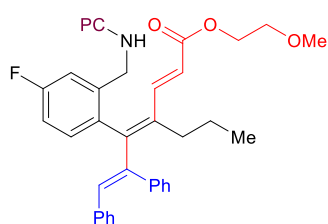

**2-Methoxyethyl (2E, 4Z, 6E)-5-(4-fluoro-2-((pyrazine-2-carboxamido) methyl) phenyl)-6,7-diphenyl-4-propylhepta-2,4,6-trienoate (5p)** Following the **General Procedure 2**, **5p** was obtained as a yellow oil (52.2 mg,

57% yield, Z/E = 98:2). **<sup>1</sup>H NMR** (500 MHz, CDCl<sub>3</sub>) δ 9.38 (d, *J* = 1.2 Hz, 1H), 8.70 (d, *J* = 2.4 Hz, 1H), 8.37 (dd, *J* =

2.3, 1.5 Hz, 1H), 7.72 (t, *J* = 5.8 Hz, 1H), 7.22-7.16 (m, 3H), 7.14-7.03 (m, 5H), 7.01-6.97 (m, 2H), 6.96-6.92 (m, 3H), 6.88-6.82 (m, 1H), 6.79 (s, 1H), 6.06 (d, *J* = 15.9 Hz, 1H), 4.53 (dd, *J* = 14.8, 6.6 Hz, 1H), 4.30 (dd, *J* = 14.8, 5.6 Hz, 1H), 4.23-4.14 (m, 2H), 3.58-3.51 (m, 2H), 3.33 (s, 3H), 2.72 (t, *J* = 8.2 Hz, 2H), 1.69-1.57 (m, 2H), 0.98 (t, *J* = 7.3 Hz, 3H). **<sup>13</sup>C NMR** (125 MHz, CDCl<sub>3</sub>) δ 166.85, 162.73, 162.29 (d, *J*<sub>CF</sub> = 247.9 Hz), 148.52, 147.22, 144.37, 144.24, 143.85, 142.40, 141.81, 138.73 (d, *J*<sub>CF</sub> = 7.2 Hz), 138.46, 137.31, 135.87, 134.09 (d, *J*<sub>CF</sub> = 3.3 Hz), 132.33 (d, *J*<sub>CF</sub> = 8.1 Hz), 131.18, 129.53, 129.02, 128.68, 128.06, 127.64, 127.46, 119.37, 115.68 (d, *J*<sub>CF</sub> = 21.8 Hz), 114.54 (d, *J*<sub>CF</sub> = 21.2 Hz), 70.41, 63.58, 59.02, 40.68, 32.11, 23.65, 14.80. **<sup>19</sup>F NMR** (471 MHz, CDCl<sub>3</sub>) δ -113.18. **HRMS (ESI)** *m/z* calculated for C<sub>37</sub>H<sub>36</sub>FN<sub>3</sub>O<sub>4</sub>Na [M+Na]<sup>+</sup>: 628.2582, found: 628.2578.

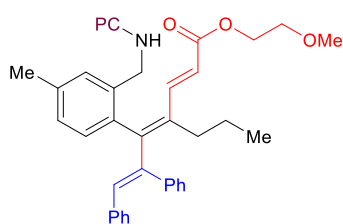

**2-Methoxyethyl (2E, 4Z, 6E)-5-(4-methyl-2-((pyrazine-2-carboxamido) methyl) phenyl)-6,7-diphenyl-4-propylhepta-2,4,6-trienoate (5q)** Following the **General Procedure 2**, **5q** was obtained as a yellow oil (47.0 mg,

52% yield, Z/E >99:1). **<sup>1</sup>H NMR** (500 MHz, CDCl<sub>3</sub>) δ 9.38 (s, 1H), 8.73-8.61 (m, 1H), 8.34 (s, 1H), 7.67 (s, 1H),

7.19-7.05 (m, 8H), 7.00-6.90 (m, 5H), 6.85 (d, *J* = 7.8 Hz, 1H), 6.75 (s, 1H), 6.02 (d, *J* = 15.9 Hz, 1H), 4.52 (dd, *J* = 14.4, 6.4 Hz, 1H), 4.29 (dd, *J* = 14.5, 5.2 Hz, 1H), 4.21-4.12 (m, 2H), 3.60-3.50 (m, 2H), 3.32 (s, 3H), 2.74-2.63 (m, 2H), 2.27 (s, 3H), 1.67-1.53 (m, 2H), 0.95 (t, *J* = 7.2 Hz, 3H). **<sup>13</sup>C NMR** (125 MHz, CDCl<sub>3</sub>) δ 167.01, 162.52, 149.86, 147.03, 144.49, 144.47, 144.35, 142.32, 142.19, 138.64, 138.08, 136.82, 136.12, 135.86, 135.43, 130.96, 130.58, 129.96, 129.51, 129.11, 128.54, 128.29, 127.97, 127.46, 127.25, 118.70, 70.44, 63.55, 59.04, 40.99, 32.13, 23.58, 21.16, 14.80. **HRMS (ESI)** *m/z* calculated for C<sub>38</sub>H<sub>39</sub>N<sub>3</sub>O<sub>4</sub>Na [M+Na]<sup>+</sup>: 624.2833, found: 624.2830.

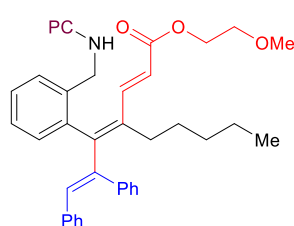

**2-Methoxyethyl (2E,4Z)-4-((E)-2,3-diphenyl-1-(2-((pyrazine-2-carboxamido) methyl) phenyl) allylidene) non-2-enoate (5r)** Following the **General Procedure 2**, **5r** was obtained as a yellow oil (59.1 mg, 64% yield, Z/E > 99:1).

**<sup>1</sup>H NMR** (500 MHz, CDCl<sub>3</sub>) δ 9.38 (s, 1H), 8.67 (d, *J* = 2.2 Hz, 1H), 8.34 (s, 1H), 7.70 (t, *J* = 5.0 Hz, 1H), 7.34 (d, *J* = 7.6

Hz, 1H), 7.22 (t, *J* = 7.3 Hz, 1H), 7.19-7.14 (m, 4H), 7.13-7.06 (m, 4H), 7.00-6.92 (m,

5H), 6.79 (s, 1H), 6.02 (d,  $J = 15.9$  Hz, 1H), 4.58 (dd,  $J = 14.6, 6.4$  Hz, 1H), 4.34 (dd,  $J = 14.6, 5.3$  Hz, 1H), 4.21-4.13 (m, 2H), 3.55-3.49 (m, 2H), 3.31 (s, 3H), 2.75-2.67 (m, 2H), 1.64-1.51 (m, 2H), 1.31 (q,  $J = 13.2, 12.7$  Hz, 4H), 0.86 (t,  $J = 6.9$  Hz, 3H).  **$^{13}\text{C}$  NMR** (125 MHz,  $\text{CDCl}_3$ )  $\delta$  166.92, 162.56, 149.55, 147.06, 144.43, 144.34, 144.28, 142.33, 141.93, 138.60, 138.43, 136.89, 136.12, 136.02, 131.19, 130.74, 129.52, 129.28, 129.09, 128.56, 128.32, 127.99, 127.51, 127.41, 127.31, 118.92, 70.41, 63.56, 59.06, 41.05, 32.51, 30.02, 29.97, 22.45, 14.05. **HRMS (ESI)**  $m/z$  calculated for  $\text{C}_{39}\text{H}_{41}\text{N}_3\text{O}_4\text{Na}$   $[\text{M}+\text{Na}]^+$ : 638.2989, found: 638.2987.

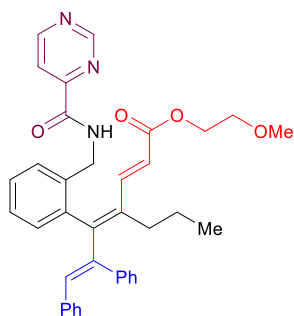

**2-Methoxyethyl (2E,4Z,6E)-6,7-diphenyl-4-propyl-5-(2-((pyrimidine-4-carboxamido) methyl) phenyl) hepta-2,4,6-trienoate** Following the **General Procedure 2**, This compound was obtained as a yellow oil (44.2 mg, 50% yield  $Z/E = 93:7$ ).  **$^1\text{H}$  NMR** (500 MHz,  $\text{CDCl}_3$ )  $\delta$  9.04 (d,  $J = 1.1$  Hz, 1H), 8.93 (d,  $J = 5.0$  Hz, 1H), 8.09 (dd,  $J = 5.0, 1.2$  Hz, 1H), 7.87 (s, 1H), 7.32 (d,  $J = 7.5$  Hz, 1H), 7.25-7.20 (m, 1H), 7.19-7.13 (m, 4H), 7.09 (dt,  $J = 7.3, 4.3$  Hz, 4H), 7.00-6.92

(m, 5H), 6.78 (s, 1H), 6.04 (d,  $J = 15.9$  Hz, 1H), 4.58 (dd,  $J = 14.6, 6.6$  Hz, 1H), 4.30 (dd,  $J = 14.6, 5.2$  Hz, 1H), 4.20-4.14 (m, 2H), 3.54 (t,  $J = 4.5$  Hz, 2H), 3.32 (s, 3H), 2.75-2.67 (m, 2H), 1.69-1.56 (m, 2H), 0.97 (t,  $J = 7.3$  Hz, 3H).  **$^{13}\text{C}$  NMR** (125 MHz,  $\text{CDCl}_3$ )  $\delta$  166.90, 162.20, 159.03, 157.54, 156.17, 149.58, 144.19, 142.00, 138.54, 138.39, 136.82, 136.01, 135.90, 131.12, 130.71, 129.53, 129.20, 129.07, 128.58, 128.38, 128.01, 127.56, 127.49, 127.37, 119.02, 118.50, 70.43, 63.53, 59.05, 41.12, 32.09, 23.62, 14.81. **HRMS (ESI)**  $m/z$  calculated for  $\text{C}_{37}\text{H}_{37}\text{N}_3\text{O}_4\text{Na}$   $[\text{M}+\text{Na}]^+$ : 610.2676, found: 610.2675.

### 3.4 General Procedure 3 for $\alpha$ -C-H Functionalization of *cis*-Styrenes

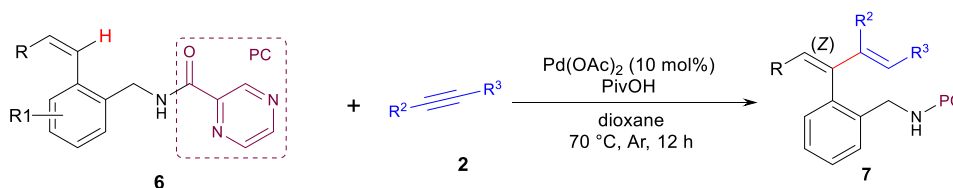

An oven-dried vial was charged with  $\text{Pd}(\text{OAc})_2$  (2.3 mg, 10 mol%), PivOH (19.5 mg, 1.5 equiv.) and dioxane (0.67 mL). Then, alkyne **2** (0.25 mmol, 2.5 equiv.) and *cis*-styrene **6** (0.1 mmol, 1.0 equiv.) were added into the solution in sequence. The vial was sealed under argon and heated to 70 °C with stirring for 12 hours. After cooling down, the mixture was concentrated and directly applied to a flash column chromatography for separation (PE/EA mixtures) to obtain the corresponding product **7**.

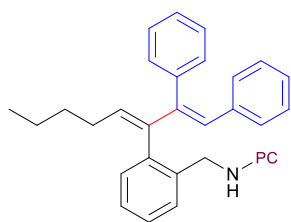

***N*-(2-((1*E*, 3*Z*)-1,2-diphenylocta-1,3-dien-3-yl) benzyl) pyrazine-2-carboxamide (7a).** Following the **General Procedure 3**, **7a** was obtained as a yellow liquid (80%, 37 mg, *Z/E* = 92:8). **<sup>1</sup>H NMR** (500 MHz, CDCl<sub>3</sub>) δ 9.37 (d, 1H), 8.54 (d, *J* = 2.5 Hz, 1H), 8.09 (s, 1H), 7.95 (d, *J* = 1.9 Hz, 1H), 7.55 (dd, *J* = 7.1, 1.9 Hz, 1H), 7.46 – 7.33 (m, 5H), 7.32 – 7.22 (m, 3H), 6.95 (ddd, *J* = 14.1, 7.7, 5.9 Hz, 3H), 6.66 – 6.53 (m, 2H), 5.97 (s, 1H), 5.50 (t, *J* = 7.5 Hz, 1H), 4.76 (dd, *J* = 14.3, 6.7 Hz, 1H), 4.61 (dd, *J* = 14.3, 5.1 Hz, 1H), 1.85 – 1.75 (m, 2H), 1.24 – 1.18 (m, 2H), 1.17 – 1.10 (m, 2H), 0.76 (t, *J* = 7.1 Hz, 3H). **<sup>13</sup>C NMR** (125 MHz, CDCl<sub>3</sub>) δ 162.51, 146.93, 144.32, 144.31, 144.17, 142.86, 142.24, 139.48, 139.16, 136.99, 135.86, 135.65, 130.88, 129.98, 129.69, 129.63, 129.37, 128.84, 128.10, 127.91, 127.60, 127.28, 126.33, 41.72, 31.47, 29.87, 22.37, 13.89. **HRMS (ESI)** *m/z* calculated for C<sub>32</sub>H<sub>31</sub>N<sub>3</sub>ONa [M+Na]<sup>+</sup>: 496.2359, found: 496.2352. **FTIR** (KBr, cm<sup>-1</sup>) 3447.66, 2958.68, 2830.84, 2715.89, 1597.20, 1364.49, 1070.09, 781.30.

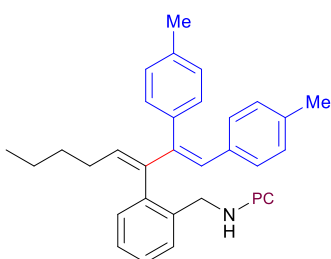

***N*-(2-((1*E*, 3*Z*)-1,2-di-*p*-tolyllocta-1,3-dien-3-yl) benzyl) pyrazine-2-carboxamide (7b).** Following the **General Procedure 3**, **7b** was obtained as a yellow liquid (68%, 34 mg, *Z/E* = 94:6). **<sup>1</sup>H NMR** (500 MHz, CDCl<sub>3</sub>) δ 9.35 (d, *J* = 1.5 Hz, 1H), 8.54 (d, *J* = 2.4 Hz, 1H), 8.06 (s, 1H), 7.97 (dd, *J* = 2.5, 1.5 Hz, 1H), 7.53 (dd, *J* = 7.3, 1.7 Hz, 1H), 7.41 – 7.34 (m, 2H), 7.23 – 7.17 (m, 3H), 7.16 – 7.10 (m, 2H), 6.75 (d, *J* = 8.0 Hz, 2H), 6.48 (d, *J* = 8.2 Hz, 2H), 5.90 (s, 1H), 5.47 (t, *J* = 7.5 Hz, 1H), 4.73 (dd, *J* = 14.3, 6.6 Hz, 1H), 4.58 (dd, *J* = 14.3, 5.1 Hz, 1H), 2.41 (s, 3H), 2.18 (s, 3H), 1.83 – 1.71 (m, 2H), 1.22 – 1.16 (m, 2H), 1.15 – 1.10 (m, 1H), 0.74 (t, *J* = 7.1 Hz, 3H). **<sup>13</sup>C NMR** (125 MHz, CDCl<sub>3</sub>) δ 162.53, 146.84, 144.37, 144.17, 143.42, 143.05, 142.24, 139.40, 136.74, 136.53, 136.00, 135.84, 134.96, 134.29, 130.88, 129.82, 129.56, 129.54, 129.29, 128.33, 128.02, 127.78, 41.73, 31.53, 29.85, 22.39, 21.38, 21.03, 13.90. **HRMS (ESI)** *m/z* calculated for C<sub>34</sub>H<sub>35</sub>N<sub>3</sub>ONa [M+Na]<sup>+</sup>: 524.2672, found: 524.2678. **FTIR** (KBr, cm<sup>-1</sup>) 3447.79, 2962.75, 2836.58, 2713.22, 1608.56, 1361.83, 1073.05, 775.85.

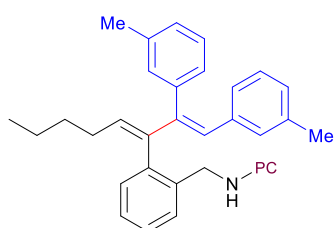

***N*-(2-((1*E*, 3*Z*)-1,2-di-*m*-tolyllocta-1,3-dien-3-yl) benzyl) pyrazine-2-carboxamide (7c).** Following the **General Procedure 3**, **7c** was obtained as a yellow liquid (70%, 35 mg, *Z/E* = 97:3). **<sup>1</sup>H NMR** (500 MHz, CDCl<sub>3</sub>) δ 9.36 (d, *J* = 1.5 Hz, 1H), 8.53 (d, *J* = 2.5 Hz, 1H), 8.09 (s, 1H), 7.98 – 7.88 (m, 1H), 7.54 (dd, *J* = 7.0, 2.0 Hz, 1H), 7.39 (td, *J* = 6.5, 1.8 Hz, 2H), 7.28 (d, *J* = 7.5 Hz, 1H), 7.22 (dd, *J* = 6.8, 2.1 Hz, 1H), 7.17 (d, *J* = 7.7 Hz, 1H), 7.05 (d, *J* = 8.5 Hz, 2H), 6.84 – 6.75 (m, 2H), 6.43 – 6.28 (m, 2H), 5.89

(s, 1H), 5.50 (t,  $J = 7.5$  Hz, 1H), 4.74 (dd,  $J = 14.3, 6.7$  Hz, 1H), 4.58 (dd,  $J = 14.3, 5.1$  Hz, 1H), 2.35 (s, 3H), 2.03 (s, 3H), 1.84 – 1.72 (m, 2H), 1.22 – 1.18 (m, 2H), 1.17 – 1.09 (m, 2H), 0.75 (t,  $J = 7.1$  Hz, 3H).  **$^{13}\text{C NMR}$**  (125 MHz,  $\text{CDCl}_3$ )  $\delta$  162.56, 146.87, 144.37, 144.21, 144.16, 142.94, 142.22, 139.50, 139.27, 138.32, 136.93, 136.90, 135.87, 135.42, 130.88, 130.51, 130.46, 129.63, 129.59, 128.66, 128.06, 127.90, 127.83, 127.46, 127.06, 126.98, 126.21, 41.79, 31.50, 29.87, 22.39, 21.48, 21.19, 13.90. **HRMS (ESI)**:  $m/z$  calculated for  $\text{C}_{34}\text{H}_{35}\text{N}_3\text{ONa}$   $[\text{M}+\text{Na}]^+$ : 524.2672, found: 524.2673. **FTIR** (KBr,  $\text{cm}^{-1}$ ): 3439.38, 2957.14, 2839.39, 2712.22, 1597.34, 1364.63, 1073.05, 781.46.

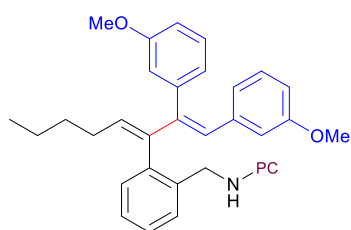

***N*-(2-(((1*E*, 3*Z*)-1,2-bis (3-methoxyphenyl) octa-1,3-dien-3-yl) benzyl) pyrazine-2-carboxamide (7d).**

Following the **General Procedure 3**, **7d** was obtained as a yellow liquid (60%, 32 mg,  $Z/E = 96:4$ ).  **$^1\text{H NMR}$**  (500 MHz,  $\text{CDCl}_3$ )  $\delta$  9.35 (d,  $J = 1.5$  Hz, 1H), 8.54 (d,  $J = 2.4$  Hz, 1H), 8.04 (s, 1H), 8.00 – 7.97 (m, 1H), 7.54 (dd,  $J = 7.1, 2.0$  Hz, 1H), 7.40 (td,  $J = 6.5, 1.7$  Hz, 2H), 7.34 (t,  $J = 7.9$  Hz, 1H), 7.23 (dd,  $J = 6.7, 2.2$  Hz, 1H), 6.94 – 6.83 (m, 4H), 6.56 – 6.51 (m, 1H), 6.26 (d,  $J = 7.6$  Hz, 1H), 6.11 (t,  $J = 2.1$  Hz, 1H), 5.90 (s, 1H), 5.53 (t,  $J = 7.5$  Hz, 1H), 4.72 (dd,  $J = 14.3, 6.5$  Hz, 1H), 4.59 (dd,  $J = 14.3, 5.2$  Hz, 1H), 3.78 (s, 3H), 3.38 (s, 3H), 1.87 – 1.72 (m, 2H), 1.24 – 1.17 (m, 2H), 1.16 – 1.09 (m, 2H), 0.75 (t,  $J = 7.1$  Hz, 3H).  **$^{13}\text{C NMR}$**  (125 MHz,  $\text{CDCl}_3$ )  $\delta$  162.49, 160.15, 158.74, 146.94, 144.28, 144.19, 144.12, 142.57, 142.27, 140.99, 139.10, 138.16, 135.82, 135.81, 130.89, 129.92, 129.70, 129.33, 128.49, 128.15, 127.92, 122.59, 122.43, 115.25, 113.44, 113.10, 113.06, 55.32, 54.69, 41.78, 31.45, 29.87, 22.39, 13.88. **HRMS (ESI)**  $m/z$  calculated for  $\text{C}_{34}\text{H}_{36}\text{N}_3\text{O}_3$   $[\text{M}+\text{H}]^+$ : 534.2751, found: 534.2753. **FTIR** (KBr,  $\text{cm}^{-1}$ ) 3442.06, 2954.21, 2828.04, 2718.69, 1591.59, 1364.49, 1070.09, 775.70.

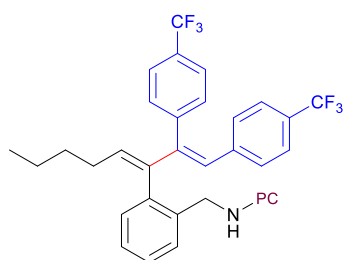

***N*-(2-(((1*E*, 3*Z*)-1,2-bis(4-(trifluoromethyl) phenyl) octa-1,3-dien-3-yl) benzyl) pyrazine-2-carboxamide (7e).**

Following the **General Procedure 3**, **7e** was obtained as a yellow liquid (65%, 40 mg,  $Z/E = 98:2$ ).  **$^1\text{H NMR}$**  (500 MHz,  $\text{CDCl}_3$ )  $\delta$  9.36 (s, 1H), 8.57 (s, 1H), 8.03 (s, 1H), 7.94 (s, 1H), 7.69 (d,  $J = 8.0$  Hz, 2H), 7.56 (dd,  $J = 6.8, 2.2$  Hz, 1H), 7.47 – 7.38 (m, 4H), 7.26 – 7.22 (m, 1H), 7.16 (d,  $J = 8.2$  Hz, 2H), 6.61 (d,  $J = 8.2$  Hz, 2H), 6.01 (s, 1H), 5.46 (t,  $J = 7.5$  Hz, 1H), 4.74 – 4.60 (m, 2H), 1.88 – 1.73 (m, 2H), 1.24 – 1.16 (m, 2H), 1.17 – 1.09 (m, 2H), 0.75 (t,  $J = 7.2$  Hz, 3H).  **$^{13}\text{C NMR}$**  (125 MHz,  $\text{CDCl}_3$ )  $\delta$  162.41, 147.16, 144.99, 144.32, 144.10, 142.80, 142.14 (d,  $J_{\text{CF}} = 5.3$  Hz), 139.98, 138.30, 137.52, 135.76, 130.84, 130.47, 130.08, 129.82, 129.71, 129.56, 129.25, 128.72, 128.34 (d,  $J_{\text{CF}} = 6.2$  Hz), 128.12, 125.94 (q,  $J_{\text{CF}} = 3.5$  Hz), 124.60 (q,  $J_{\text{CF}} = 3.8$  Hz), 124.10 (d,  $J_{\text{CF}} = 272.4$  Hz), 123.94 (d,  $J_{\text{CF}} = 271.9$  Hz), 41.61, 31.30, 29.99, 22.39,



13.82. **<sup>19</sup>F NMR** (471 MHz, CDCl<sub>3</sub>) δ -62.42, -62.67. **HRMS (ESI)** *m/z* calculated for C<sub>34</sub>H<sub>30</sub>F<sub>6</sub>N<sub>3</sub>O [M+H]<sup>+</sup>: 610.2288, found: 610.2287. **FTIR** (KBr, cm<sup>-1</sup>) 3456.07, 2962.62, 2830.84, 2715.89, 1600.00, 1358.88, 1070.09, 775.70.

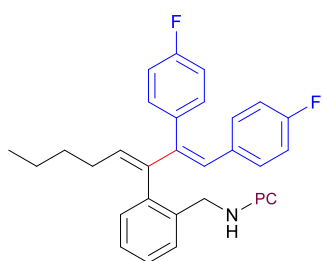

***N*-(2-((1*E*,3*Z*)-1,2-bis (4-fluorophenyl) octa-1,3-dien-3-yl) benzyl) pyrazine-2-carboxamide (7f)**. Following the **General Procedure 3**, **7f** was obtained as a yellow liquid (55%, 28 mg, *Z/E* = 91:9). **<sup>1</sup>H NMR** (500 MHz, CDCl<sub>3</sub>) δ 9.36 (d, 1H), 8.59 (d, *J* = 2.5 Hz, 1H), 8.06 (t, *J* = 1.9 Hz, 1H), 7.99 (s, 1H), 7.53 (dd, *J* = 6.5, 2.2 Hz, 1H), 7.46 – 7.37 (m, 2H), 7.24 – 7.20 (m, 3H), 7.11 (t, *J* = 8.7 Hz, 2H), 6.66 – 6.60 (m, 2H), 6.58 – 6.49 (m, 2H), 5.92 (s, 1H), 5.46 (t, *J* = 7.5 Hz, 1H), 4.74 – 4.51 (m, 2H), 1.84 – 1.73 (m, 2H), 1.24 – 1.16 (m, 2H), 1.16 – 1.09 (m, 2H), 0.75 (t, *J* = 7.2 Hz, 3H). **<sup>13</sup>C NMR** (125 MHz, CDCl<sub>3</sub>) δ 162.45, 162.16 (d, *J*<sub>CF</sub> = 246.6 Hz), 161.20 (d, *J*<sub>CF</sub> = 247.5 Hz), 147.06, 144.29, 144.25, 142.95 (d, *J*<sub>CF</sub> = 1.9 Hz), 142.67, 142.18, 138.90, 135.75, 135.64, 134.95 (d, *J*<sub>CF</sub> = 3.4 Hz), 132.94 (d, *J*<sub>CF</sub> = 3.4 Hz), 131.70 (d, *J*<sub>CF</sub> = 7.8 Hz), 130.84, 130.81, 130.78, 129.57, 128.77, 128.10 (d, *J*<sub>CF</sub> = 20.7 Hz), 116.02 (d, *J*<sub>CF</sub> = 21.2 Hz), 114.60 (d, *J*<sub>CF</sub> = 21.3 Hz), 41.65, 31.45, 29.83, 22.36, 13.86. **<sup>19</sup>F NMR** (471 MHz, CDCl<sub>3</sub>) δ -114.56, -114.98. **HRMS (ESI)** *m/z* calculated for C<sub>32</sub>H<sub>30</sub>N<sub>3</sub>OF<sub>2</sub> [M+H]<sup>+</sup>: 510.2351, found: 510.2358. **FTIR** (KBr, cm<sup>-1</sup>) 3442.06, 2962.62, 2833.64, 2718.69, 1602.80, 1361.68, 1227.10, 1064.49, 778.50..

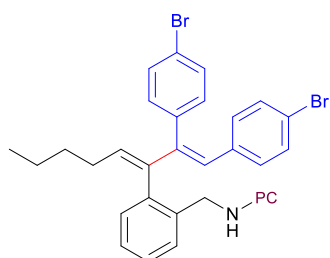

***N*-(2-((1*E*, 3*Z*)-1,2-bis (4-bromophenyl) octa-1,3-dien-3-yl) benzyl) pyrazine-2-carboxamide (7g)**. Following the **General Procedure 3**, **7g** was obtained as a white solid (73%, 46 mg, *Z/E* = 98:2). **<sup>1</sup>H NMR** (500 MHz, CDCl<sub>3</sub>) δ 9.35 (d, *J* = 1.5 Hz, 1H), 8.60 (d, *J* = 2.4 Hz, 1H), 8.05 (dd, *J* = 2.5, 1.5 Hz, 1H), 7.95 (s, 1H), 7.54 (dd, *J* = 8.9, 3.0 Hz, 3H), 7.44 – 7.38 (m, 2H), 7.22 – 7.18 (m, 1H), 7.13 (d, *J* = 8.3 Hz, 2H), 7.06 (d, *J* = 8.6 Hz, 2H), 6.42 (d, *J* = 8.6 Hz, 2H), 5.88 (s, 1H), 5.47 (t, *J* = 7.5 Hz, 1H), 4.69 – 4.57 (m, 2H), 1.84 – 1.71 (m, 2H), 1.23 – 1.16 (m, 2H), 1.15 – 1.09 (m, 2H), 0.75 (t, *J* = 7.1 Hz, 3H). **<sup>13</sup>C NMR** (125MHz, CDCl<sub>3</sub>) δ 162.43, 147.09, 144.28, 144.16, 143.72, 142.36, 142.19, 138.65, 137.96, 136.40, 135.73, 135.57, 132.21, 131.77, 130.84, 130.82, 130.73, 129.66, 128.70, 128.25, 128.12, 121.63, 120.42, 41.64, 31.38, 29.91, 22.38, 13.87. **HRMS (ESI)** *m/z* calculated for C<sub>32</sub>H<sub>29</sub>N<sub>3</sub>OBr<sub>2</sub>Na [M+Na]<sup>+</sup>: 652.0570, found: 652.0574. **FTIR** (KBr, cm<sup>-1</sup>) 3456.07, 2954.21, 2830.84, 2718.69, 1608.41, 1364.49, 1072.90, 775.70.

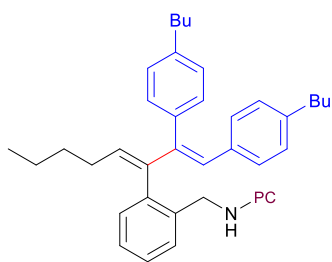

***N*-(2-((1*E*,3*Z*)-1,2-bis (4-butylphenyl) octa-1,3-dien-3-yl)benzyl) pyrazine-2-carboxamide (7h).** Following the **General Procedure 3**, **7h** was obtained as a yellow liquid (69%, 41 mg, *Z/E* > 99:1). **<sup>1</sup>H NMR** (500 MHz, CDCl<sub>3</sub>) δ 9.35 (d, *J* = 1.5 Hz, 1H), 8.51 (d, *J* = 2.5 Hz, 1H), 8.09 (s, 1H), 7.91 (dd, *J* = 2.4, 1.5 Hz, 1H), 7.53 (dd, *J* = 6.9, 2.0 Hz, 1H), 7.45 – 7.32 (m, 2H), 7.21 (d, *J* = 8.3 Hz, 3H), 7.14 (d, *J* = 8.0 Hz, 2H), 6.74 (d, *J* = 8.1 Hz, 2H), 6.46 (d, *J* = 8.2 Hz, 2H), 5.89 (s, 1H), 5.48 (t, *J* = 7.6 Hz, 1H), 4.74 (dd, *J* = 14.2, 6.8 Hz, 1H), 4.56 (dd, *J* = 14.3, 5.0 Hz, 1H), 2.68 (t, *J* = 7.7 Hz, 2H), 2.43 (t, *J* = 7.7 Hz, 2H), 1.85 – 1.73 (m, 2H), 1.71 – 1.62 (m, 2H), 1.53 – 1.44 (m, 2H), 1.43 – 1.35 (m, 2H), 1.32 – 1.26 (m, 2H), 1.23 – 1.17 (m, 2H), 1.16 – 1.09 (m, 2H), 0.97 (t, *J* = 7.4 Hz, 3H), 0.87 (t, *J* = 7.4 Hz, 3H), 0.74 (t, *J* = 7.2 Hz, 3H). **<sup>13</sup>C NMR** (125MHz, CDCl<sub>3</sub>) δ 162.51, 146.80, 144.36, 144.15, 143.50, 143.05, 142.22, 141.79, 141.09, 139.41, 136.81, 135.85, 134.98, 134.50, 130.87, 129.72, 129.61, 129.58, 129.32, 128.92, 128.02, 127.77, 127.66, 41.74, 35.45, 35.18, 33.56, 33.47, 31.53, 29.84, 29.71, 22.38, 22.31, 14.04, 13.92, 13.89. **HRMS (ESI)** *m/z* calculated for C<sub>40</sub>H<sub>47</sub>N<sub>3</sub>ONa [M+Na]<sup>+</sup>: 608.3611, found: 608.3613. **FTIR** (KBr, cm<sup>-1</sup>) 3467.29, 2962.62, 2830.84, 2718.69, 1602.80, 1361.68, 1070.09, 781.31.

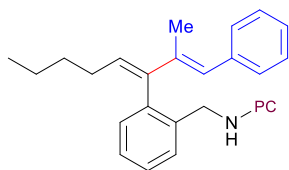

***N*-(2-((1*E*,3*Z*)-2-methyl-1-phenylocta-1,3-dien-3-yl) benzyl) pyrazine-2-carboxamide (7i).** Following the **General Procedure 3**, **7i** was obtained as a yellow liquid (44%, 18 mg, *Z/E* > 99:1). **<sup>1</sup>H NMR** (500 MHz, CDCl<sub>3</sub>) δ 9.29 (s, 1H), 8.53 (d, *J* = 2.5 Hz, 1H), 8.06 (d, *J* = 1.9 Hz, 1H), 7.87 (s, 1H), 7.44 – 7.38 (m, 1H), 7.29 – 7.23 (m, 2H), 7.15 (t, *J* = 7.5 Hz, 2H), 7.10 – 6.99 (m, 4H), 5.98 (t, *J* = 7.3 Hz, 1H), 5.89 (s, 1H), 4.53 (dd, *J* = 14.4, 6.5 Hz, 1H), 4.38 (dd, *J* = 14.4, 5.3 Hz, 1H), 2.06 (s, 3H), 1.87 – 1.70 (m, 2H), 1.32 – 1.23 (m, 2H), 1.18 – 1.11 (m, 2H), 0.74 (t, *J* = 7.2 Hz, 3H). **<sup>13</sup>C NMR** (125 MHz, CDCl<sub>3</sub>) δ 162.48, 146.95, 144.45, 144.24, 142.30, 142.25, 139.51, 138.24, 138.22, 135.78, 130.87, 130.76, 129.72, 129.32, 127.82, 127.80, 127.65, 126.21, 41.62, 31.80, 29.76, 22.42, 15.33, 13.95. **HRMS (ESI)** *m/z* calculated for C<sub>27</sub>H<sub>29</sub>N<sub>3</sub>ONa [M+Na]<sup>+</sup>: 434.2203, found: 434.2203. **FTIR** (KBr, cm<sup>-1</sup>) 3436.58, 2954.34, 2828.17, 2718.83, 1594.54, 1359.03, 1073.05, 770.25.

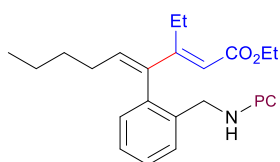

**Ethyl (2*E*, 4*Z*)-3-ethyl-4-(2-((pyrazine-2-carboxamido) methyl) phenyl) nona-2,4-dienoate (7j).** Following the **General Procedure 3**, **7j** was obtained as a yellow liquid (26%, 11 mg, *Z/E* > 99:1). **<sup>1</sup>H NMR** (500 MHz, CDCl<sub>3</sub>) δ 9.39 (d, 1H), 8.72 (d, *J* = 2.4 Hz, 1H), 8.44 (dd, *J* = 2.5, 1.5 Hz, 1H), 7.90 (s, 1H), 7.49 – 7.46 (m, 1H), 7.36 – 7.32 (m, 2H), 7.05 – 7.00 (m, 1H), 6.37 (t, *J* = 7.4 Hz, 1H), 5.20 (s, 1H), 4.53 (dd, *J* = 14.7, 6.5 Hz, 1H), 4.39 (dd, *J* = 14.7, 5.5 Hz, 1H), 4.10 – 3.97 (m, 2H), 3.07 – 2.98 (m, 1H), 2.96 – 2.81 (m, 1H), 1.99 – 1.76 (m, 2H), 1.28 – 1.22 (m, 4H),

1.21 – 1.14 (m, 6H), 0.81 (t,  $J = 7.3$  Hz, 3H).  **$^{13}\text{C}$  NMR** (125 MHz,  $\text{CDCl}_3$ )  $\delta$  166.71, 162.53, 160.66, 147.16, 144.43, 142.39, 139.61, 137.99, 136.73, 135.66, 130.55, 129.22, 128.04, 117.48, 59.62, 41.34, 31.33, 30.09, 22.41, 21.34, 14.44, 14.24, 13.88. **HRMS (ESI)**  $m/z$  calculated for  $\text{C}_{25}\text{H}_{31}\text{N}_3\text{O}_3\text{Na}$   $[\text{M}+\text{Na}]^+$ : 444.2258, found: 444.2256. **FTIR** (KBr,  $\text{cm}^{-1}$ ) 3453.27, 2954.21, 2830.84, 2718.69, 1608.41, 1367.29, 1067.29, 778.50.

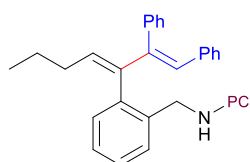

**N-(2-((1E, 3Z)-1,2-diphenylhepta-1,3-dien-3-yl) benzyl) pyrazine-2-carboxamide (7k)**. Following the **General Procedure 3**, **7k** was obtained as a yellow liquid (87%, 40 mg,  $Z/E > 99:1$ ).  **$^1\text{H}$  NMR** (500 MHz,  $\text{CDCl}_3$ )  $\delta$  9.36 (d,  $J = 1.3$  Hz, 1H), 8.53 (d,  $J = 2.4$  Hz, 1H), 8.08 (s, 1H), 7.95 (dd,  $J = 2.4, 1.5$  Hz, 1H), 7.54 (dd,  $J = 7.2, 1.6$  Hz, 1H), 7.43 – 7.35 (m, 5H), 7.29 – 7.21 (m, 3H), 6.99 – 6.90 (m, 3H), 6.60 – 6.53 (m, 2H), 5.96 (s, 1H), 5.49 (t,  $J = 7.5$  Hz, 1H), 4.75 (dd,  $J = 14.3, 6.7$  Hz, 1H), 4.60 (dd,  $J = 14.3, 5.1$  Hz, 1H), 1.84 – 1.70 (m, 2H), 1.25 – 1.20 (m, 2H), 0.74 (t,  $J = 7.4$  Hz, 3H).  **$^{13}\text{C}$  NMR** (125 MHz,  $\text{CDCl}_3$ )  $\delta$  162.53, 146.94, 144.30, 144.18, 143.05, 142.24, 139.49, 139.17, 136.99, 135.86, 135.47, 130.90, 129.99, 129.72, 129.61, 129.38, 128.84, 128.10, 127.91, 127.61, 127.29, 126.35, 41.72, 32.10, 22.48, 13.85. **HRMS (ESI)**  $m/z$  calculated for  $\text{C}_{31}\text{H}_{29}\text{N}_3\text{ONa}$   $[\text{M}+\text{Na}]^+$ : 482.2203, found: 482.2204.

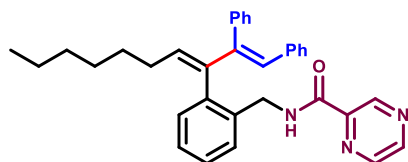

**N-(2-((1E, 3Z)-1,2-diphenyl deca-1,3-dien-3-yl) benzyl) pyrazine-2-carboxamide (7l)**. Following the general experiment procedure, **7l** was obtained as a yellow liquid (78%, 39 mg,  $Z/E > 99:1$ ).  **$^1\text{H}$  NMR** (500 MHz,  $\text{CDCl}_3$ ):  $\delta$  9.36 (d,  $J = 1.5$  Hz, 1H), 8.53 (d,  $J = 2.4$  Hz, 1H), 8.08 (s, 1H), 7.94 (dd,  $J = 2.5, 1.5$  Hz, 1H), 7.54 (dd,  $J = 7.0, 1.9$  Hz, 1H), 7.43 – 7.34 (m, 5H), 7.28 – 7.19 (m, 3H), 6.98 – 6.88 (m, 3H), 6.65 – 6.37 (m, 2H), 5.96 (s, 1H), 5.49 (t,  $J = 7.5$  Hz, 1H), 4.74 (dd,  $J = 14.3, 6.6$  Hz, 1H), 4.59 (dd,  $J = 14.3, 5.1$  Hz, 1H), 1.84 – 1.67 (m, 2H), 1.22 – 1.15 (m, 4H), 1.13 – 1.06 (m, 4H), 0.81 (t,  $J = 7.2$  Hz, 3H).  **$^{13}\text{C}$  NMR** (125 MHz,  $\text{CDCl}_3$ ):  $\delta$  162.52, 146.94, 144.32, 144.18, 142.84, 142.23, 139.49, 139.17, 137.00, 135.87, 135.72, 130.88, 129.99, 129.69, 129.64, 129.37, 128.84, 128.10, 127.91, 127.61, 127.28, 126.34, 41.73, 31.52, 30.13, 29.20, 28.93, 22.48, 14.02. **HR-MS (ESI)**:  $m/z$  calculated for  $\text{C}_{34}\text{H}_{35}\text{N}_3\text{ONa}$ :  $[\text{M}+\text{Na}]^+$ : 524.2672, found: 524.2676.

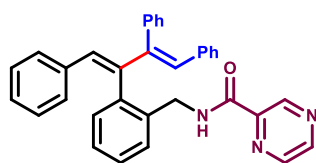

**N-(2-((1Z, 3E)-1,3,4-triphenyl buta-1,3-dien-2-yl) benzyl) pyrazine-2-carboxamide (7m)**. Following the general experiment procedure, **7m** was obtained as a colorless liquid (41%, 20 mg,  $Z/E > 99:1$ ).  **$^1\text{H}$  NMR** (500 MHz,  $\text{CDCl}_3$ ):  $\delta$  9.28 (d,  $J = 1.5$  Hz, 1H), 8.50 (d,  $J = 2.4$  Hz,

1H), 7.92 (dd,  $J = 2.5, 1.5$  Hz, 1H), 7.91 (s, 1H), 7.61 – 7.56 (m, 1H), 7.48 – 7.44 (m, 4H), 7.43 – 7.40 (m, 1H), 7.39 – 7.32 (m, 3H), 7.04 – 6.92 (m, 6H), 6.68 – 6.57 (m, 4H), 6.37 (s, 1H), 6.17 (s, 1H), 4.64 – 4.53 (m, 2H).  **$^{13}\text{C}$  NMR** (125 MHz,  $\text{CDCl}_3$ ):  $\delta$  162.50, 146.77, 145.06, 144.25, 144.08, 142.96, 142.14, 139.23, 139.12, 136.81, 136.57, 135.80, 132.73, 131.66, 131.07, 130.54, 130.18, 129.53, 129.20, 129.07, 128.83, 128.51, 128.09, 127.72, 127.58, 127.14, 126.74, 41.83. **HR-MS (ESI)**:  $m/z$  calculated for  $\text{C}_{34}\text{H}_{27}\text{N}_3\text{O}$ :  $[\text{M}+\text{H}]^+$ : 494.2227, found: 494.2222.

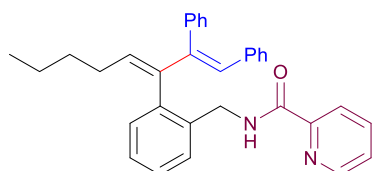

***N*-(2-((1*E*,3*Z*)-1,2-diphenylocta-1,3-dien-3-yl) benzyl) picolinamide (7n)**. Following the General Procedure 3, **7n** was obtained as a yellow liquid (89%, 42 mg,  $Z/E > 99:1$ ).  **$^1\text{H}$  NMR** (500 MHz,  $\text{CDCl}_3$ )  $\delta$  8.34 (s, 1H), 8.17 (d,  $J = 7.8$  Hz, 1H), 8.13 (d,  $J = 4.6$  Hz, 1H), 7.76 (td,  $J = 7.7, 1.8$  Hz, 1H), 7.55 (dd,  $J = 7.0, 2.1$  Hz, 1H), 7.43 – 7.32 (m, 5H), 7.29 – 7.24 (m, 3H), 7.23 – 7.21 (m, 1H), 6.98 – 6.89 (m, 3H), 6.65 – 6.54 (m, 2H), 5.99 (s, 1H), 5.48 (t,  $J = 7.5$  Hz, 1H), 4.75 (dd,  $J = 14.5, 6.7$  Hz, 1H), 4.60 (dd,  $J = 14.5, 5.3$  Hz, 1H), 1.92 – 1.70 (m, 2H), 1.24 – 1.16 (m, 2H), 1.16 – 1.07 (m, 2H), 0.74 (t,  $J = 7.1$  Hz, 3H).  **$^{13}\text{C}$  NMR** (125 MHz,  $\text{CDCl}_3$ )  $\delta$  164.01, 149.78, 147.88, 144.18, 142.93, 139.61, 139.01, 137.14, 137.10, 136.39, 135.50, 130.74, 130.14, 129.64, 129.44, 129.29, 128.74, 127.79, 127.56, 127.16, 126.23, 125.91, 122.08, 41.53, 31.51, 29.88, 22.39, 13.90. **HRMS (ESI)**  $m/z$  calculated for  $\text{C}_{33}\text{H}_{32}\text{N}_2\text{OK}$   $[\text{M}+\text{K}]^+$ : 511.2146, found: 511.2147. **FTIR** (KBr,  $\text{cm}^{-1}$ ) 3836.45, 2965.42, 2833.64, 2718.69, 1591.59, 1361.68, 1072.90, 775.70.

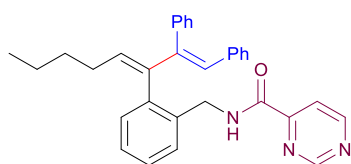

***N*-(2-((1*E*,3*Z*)-1,2-diphenylocta-1,3-dien-3-yl) benzyl) pyrimidine-4-carboxamide (7o)**. Following the General Procedure 3, **7o** was obtained as a yellow liquid (52%, 25 mg,  $Z/E > 99:1$ ).  **$^1\text{H}$  NMR** (500 MHz,  $\text{CDCl}_3$ )  $\delta$  8.78 (d,  $J = 5.1$  Hz, 1H), 8.62 (s, 1H), 8.19 (s, 1H), 7.98 (d,  $J = 4.9$  Hz, 1H), 7.45 (d,  $J = 7.0$  Hz, 1H), 7.38 – 7.28 (m, 5H), 7.18 (q,  $J = 7.9, 5.9$  Hz, 4H), 6.88 (dd,  $J = 12.4, 7.1$  Hz, 3H), 6.51 (d,  $J = 7.5$  Hz, 1H), 5.89 (s, 1H), 5.41 (t,  $J = 7.5$  Hz, 1H), 4.66 (dd,  $J = 14.5, 6.6$  Hz, 1H), 4.52 (dd,  $J = 14.4, 5.2$  Hz, 1H), 1.88 – 1.52 (m, 2H), 1.19 – 1.10 (m, 2H), 1.09 – 1.02 (m, 2H), 0.67 (t,  $J = 7.1$  Hz, 3H).  **$^{13}\text{C}$  NMR** (125 MHz,  $\text{CDCl}_3$ )  $\delta$  162.16, 158.94, 157.50, 156.08, 144.22, 142.84, 139.47, 139.18, 136.93, 135.63, 130.90, 130.00, 129.74, 129.56, 129.38, 128.83, 128.16, 127.93, 127.63, 127.29, 126.48, 118.35, 41.82, 31.48, 29.87, 22.38, 13.88. **HRMS (ESI)**  $m/z$  calculated for  $\text{C}_{32}\text{H}_{31}\text{N}_3\text{ONa}$   $[\text{M}+\text{Na}]^+$ : 496.2359, found: 496.2360. **FTIR** (KBr,  $\text{cm}^{-1}$ ) 3461.68, 2962.62, 2830.84, 2721.50, 1600.00, 1367.29, 1064.49, 772.90.

## 4. Pd-Catalyzed H/D Exchange

### 4.1 Pd-Catalyzed H/D Exchange in Cross-Coupling-1

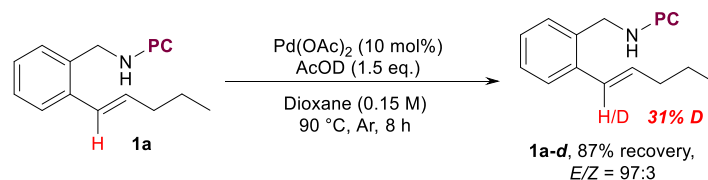

A screw-cap vial was charged with Pd(OAc)<sub>2</sub> (10 mol%, 0.015 mmol), amide **1a** (1.0 equiv, 0.15 mmol) and 1,4-dioxane (1.0 mL). Then, AcOD (1.5 equiv, 0.23 mmol) were added into the solution in sequence. The vial was sealed under argon atmosphere and heated to 90 °C with stirring for 8 h. After cooling down, the mixture was directly applied to a flash column chromatography (PE/EA mixtures) for separation to obtain **1a** and **1a-d**. Deuterium incorporation and isomeric ratio were determined by <sup>1</sup>H NMR analysis.

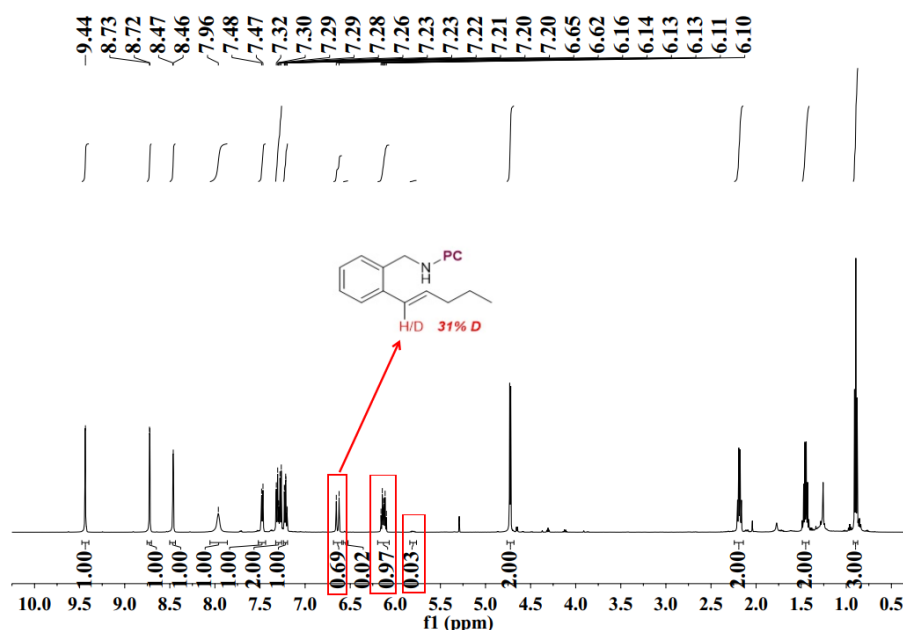

### 4.2 Pd-Catalyzed H/D Exchange in Cross-Coupling-2

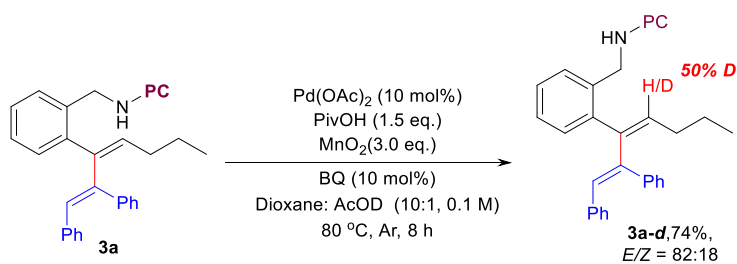

A screw-cap vial was charged with Pd(OAc)<sub>2</sub> (10 mol%, 0.015 mmol), MnO<sub>2</sub> (3.0 equiv, 0.45 mmol), BQ (10 mol%, 0.015 mmol), amide **3a** (1.0 equiv, 0.15 mmol) and dioxane/AcOD (*v: v* = 10: 1, 0.1 M). Then, pivalic acid (1.5 equiv, 0.23 mmol) was added into the solution. The vial was sealed under argon atmosphere and heated to 80°C with stirring for 8 h. After cooling down, the mixture was directly applied to a flash column chromatography (PE/EA mixtures) for separation to obtain a mixture of **3a** and **3a-d**. Deuterium incorporation and isomeric ratio were determined by <sup>1</sup>H NMR analysis.

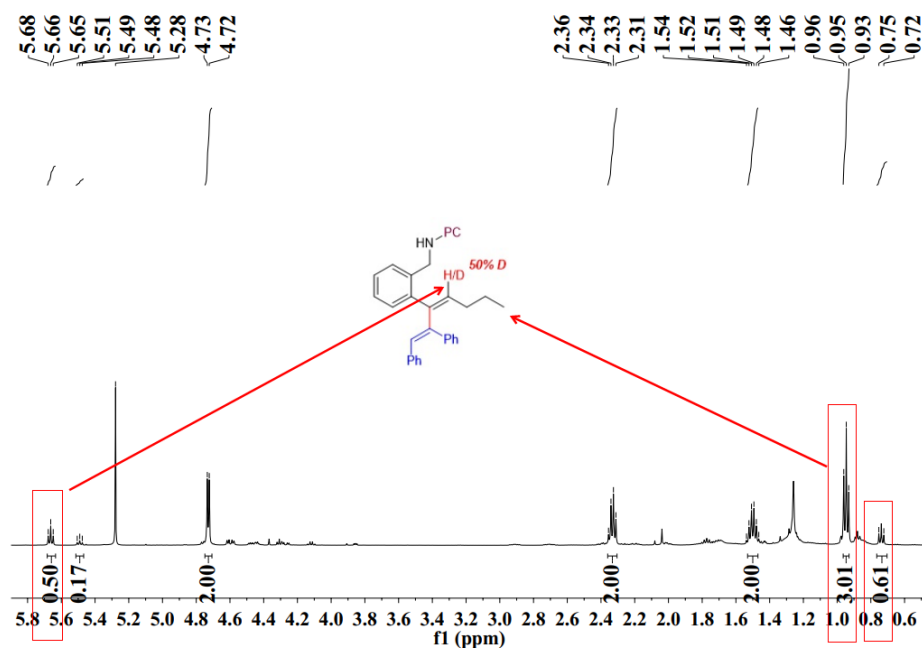

## 5. Competition Experiment for *trans*- and *cis*-Styrenes

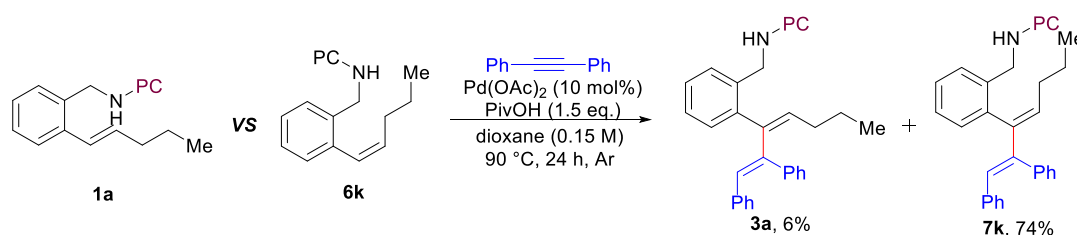

A screw-cap vial was charged with Pd(OAc)<sub>2</sub> (10 mol%, 0.015 mmol), alkyne **2** (1.0equiv, 0.1 mmol), amide **1a** (1.0 equiv, 0.1 mmol) and **6k** (1.0 equiv, 0.1 mmol) and 1,4-dioxane (0.7 mL). Then, PivOH (1.5 equiv, 0.15 mmol) were added into the solution in sequence. The vial was sealed under argon atmosphere and heated to 70 °C with stirring for 12 h. After cooling down, the mixture was directly applied to a flash column chromatography (PE/EA mixtures) for separation to obtain a mixture of **3a** and **7k** (36.7 mg, 80%). The yields of **3a** or **7k** were determined by <sup>1</sup>H NMR analysis.

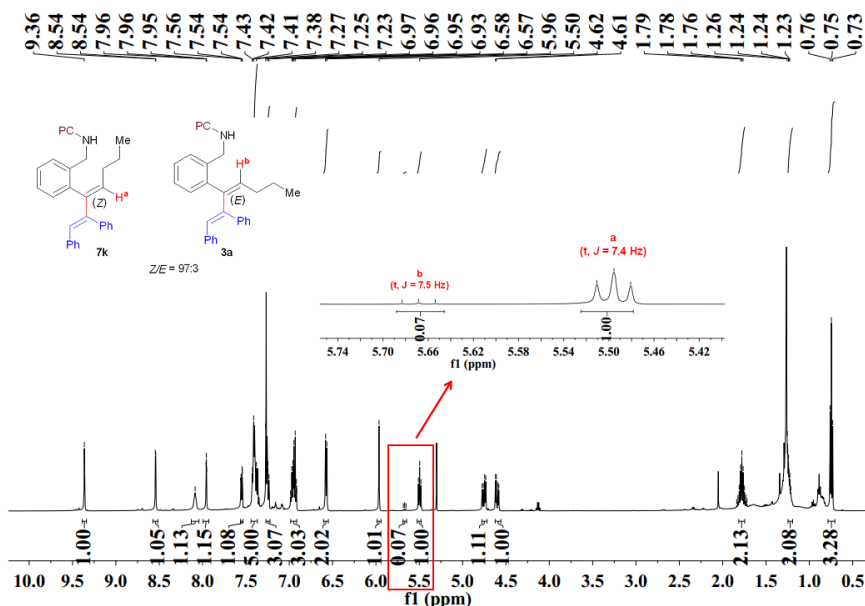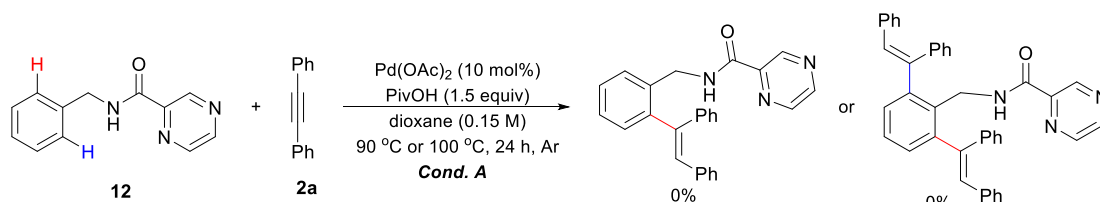

A screw-cap vial was charged with Pd(OAc)<sub>2</sub> (10 mol%, 0.015 mmol), alkyne **2** (1.0equiv, 0.1 mmol) and benzyl amide **12** (1.0 equiv, 0.1 mmol) in 1,4-dioxane (0.7 mL). Then, PivOH (1.5 equiv, 0.15 mmol) were added into the solution in sequence. The vial was sealed under argon atmosphere and heated to 90 °C or 100 °C with stirring for 24 h. No reaction occurred and the amide **12** was totally recovered.

## 6. Synthetic Applications

### 6.1 Scaled-up preparation

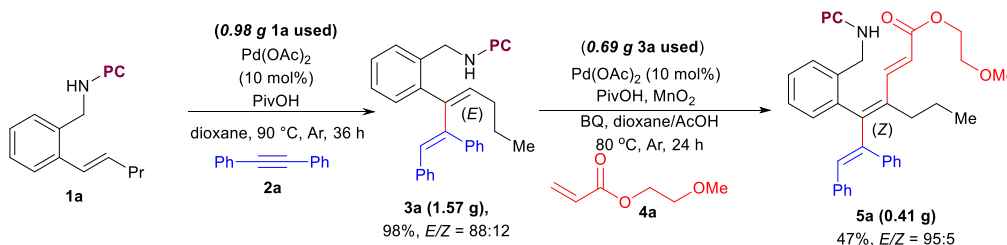

A screw-cap vial was charged with Pd(OAc)<sub>2</sub> (10 mol%, 0.35 mmol, 78.6 mg), amide **1a** (1.0 equiv, 3.5 mmol, 0.98 g), diarylacetylene **2a** (2.5 equiv, 8.75 mmol, 1.56 g) and 1,4-dioxane (0.15 M, 40 mL). Then, pivalic acid (1.5 equiv, 5.25 mmol, 0.54 g) were added into the solution in sequence. The vial was sealed under argon atmosphere and heated to 90 °C with stirring for 36 h. After cooling down, the mixture was directly applied to a flash column chromatography (PE/EA mixtures) for separation to obtain

the corresponding product **3a** (1.57 g, 3.4 mmol, 98%, *E/Z* = 88: 12).

A screw-cap vial was charged with Pd(OAc)<sub>2</sub> (10 mol%, 0.15 mmol, 33.7 mg), MnO<sub>2</sub> (3.0 equiv, 4.5 mmol, 0.37 g), BQ (10 mol%, 0.15 mmol, 16.2 mg), amide **3a** (1.0 equiv, 1.5 mmol, 0.69 g), olefin **4a** (2.5 equiv, 3.8 mmol, 0.49 g) and 1,4-dioxane/AcOH (*v: v* = 10: 1, 15 mL, 0.1 M). Then, pivalic acid (1.5 equiv, 2.3 mmol, 0.23 g) were added into the solution in sequence. The vial was sealed under Ar atmosphere and heated to 80 °C with stirring for 24 h. After cooling down, the mixture was directly applied to a flash column chromatography (PE/EA mixtures) for separation to obtain the corresponding product **5a** (0.41 g, 0.7 mmol, 47%, *E/Z* = 95: 5).

## 6.2 DG Removal

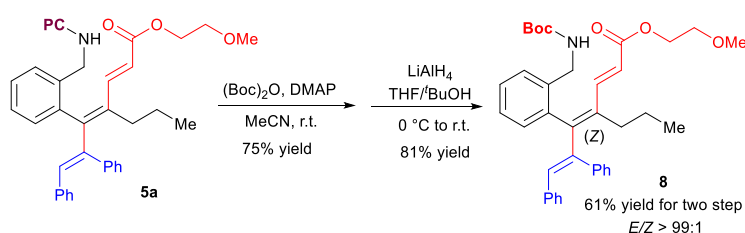

**DG remove experiment according to previous literature**<sup>[11]</sup>: Boc-anhydride (436.5 mg, 1.5 mmol, 10 equiv) was added to a solution of **5a** (117.5 mg, 0.2 mmol, 1.0 equiv) and DMAP (57.7 mg, 0.3 mmol, 2.0 equiv) in MeCN (1.0 mL, 0.2 M) and the reaction mixture was stirred overnight. The reaction mixture was quenched with NH<sub>4</sub>Cl (10 mL, sat. aq) and extracted with CH<sub>2</sub>Cl<sub>2</sub> (3 × 20 mL). The combined organic extracts were dried Na<sub>2</sub>SO<sub>4</sub>, concentrated under reduced pressure and purified by column chromatography (SiO<sub>2</sub>, PE / EA=40:1 to 20: 1) to give N-Boc-amide (103.18 mg, 75% yield, *E/Z* > 99: 1).

Then to a solution of N-Boc-amide in THF/BuOH (1: 1, 0.02 M) was added LiAlH<sub>4</sub> (2.0 equiv, 2.5 M in THF) dropwisely over 30 min at 0°C and stirred at room temperature for 2 h, and 2 N NaOH was added slowly at 0°C until a clear solution was obtained. The organic layer was separated and the aqueous phase was extracted with Et<sub>2</sub>O (20 mL × 3). Combined the organic layers and dried over Na<sub>2</sub>SO<sub>4</sub>. After removing the solvent under reduced pressure, the residue was purified by column chromatography on silica gel with PE/EA and the resulting amine **11** was obtained as a light yellow oil (71.0 mg, 81% yield, 61% yield for two steps, *E/Z* > 99:1).

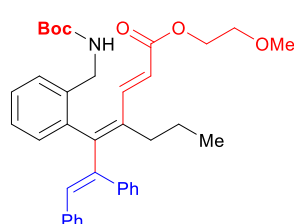

**2-Methoxyethyl (2*E*,4*Z*,6*E*)-5-(2-(((tert-butoxycarbonyl) amino) methyl) phenyl)-6,7-diphenyl-4-propylhepta-2,4,6-trienoate (8)** According to previous literature reports, **8** was obtained as a light yellow oil (71.0 mg, 61% yield, *Z/E* > 99:1). **<sup>1</sup>H NMR** (500 MHz, CDCl<sub>3</sub>) δ 7.26 (d, *J* = 7.6 Hz, 1H), 7.23-



7.14 (m, 5H), 7.13-7.10 (m, 3H), 7.08 (d,  $J = 16.2$  Hz, 1H), 7.03-6.96 (m, 3H), 6.93-6.88 (m, 2H), 6.73 (s, 1H), 6.04 (d,  $J = 15.9$  Hz, 1H), 4.31 (s, 1H), 4.25-4.17 (m, 2H), 4.12 (dd,  $J = 14.4, 6.1$  Hz, 1H), 3.92 (dd,  $J = 14.4, 5.0$  Hz, 1H), 3.55 (t,  $J = 4.7$  Hz, 2H), 3.32 (s, 3H), 2.75-2.63 (m, 2H), 1.70-1.55 (m, 2H), 1.42 (s, 9H), 0.97 (t,  $J = 7.3$  Hz, 3H).  **$^{13}\text{C NMR}$**  (125 MHz,  $\text{CDCl}_3$ )  $\delta$  167.04, 155.78, 149.48, 144.40, 142.15, 138.65, 137.94, 137.27, 136.19, 136.14, 130.91, 130.06, 129.46, 129.11, 128.90, 128.55, 128.19, 128.05, 127.50, 127.29, 127.01, 118.68, 79.06, 70.44, 63.49, 59.00, 41.85, 32.03, 28.43, 23.57, 14.80. **HRMS (ESI)**  $m/z$  calculated for  $\text{C}_{37}\text{H}_{43}\text{NO}_4 \text{Na}$   $[\text{M}+\text{Na}]^+$ : 604.3033, found: 604.3033.

### 6.3 Ester Hydrolysis

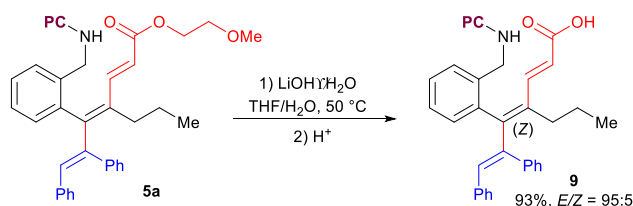

A solution of **5a** (58.8 mg, 0.1 mmol, 1.0 equiv) in THF/ $\text{H}_2\text{O}$  (0.1 M, 1.0 mL,  $v/v = 1:1$ ) was treated with  $\text{LiOH}\cdot\text{H}_2\text{O}$  (0.42 g, 1.0 mmol, 10.0 equiv). The reaction heated to  $50^\circ\text{C}$  and stirred overnight. Solvent was removed in vacuo, followed by the addition of HCl (1 N) to  $\text{pH} < 7$ . The organic layer was separated and the aqueous phase was extracted with EA. The organic layers were combined and dried over anhydrous  $\text{Na}_2\text{SO}_4$ . After removing the solvent under reduced pressure, the residue was purified by column chromatography on silica gel with PE/EA (1: 4) to obtained **9** as a light yellow solid (49.4 mg, 93 % yield,  $E/Z = 95:5$ ).

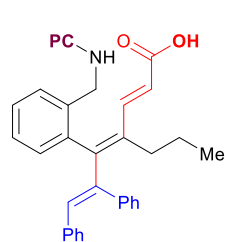

**(2E, 4Z, 6E)-6,7-Diphenyl-4-propyl-5-((pyrazine-2-carboxamido) methyl) phenyl hepta-2,4,6-trienoic acid (9)**

According to the above method, **7** was obtained as a light yellow solid (49.4 mg, 93 % yield,  $Z/E = 95:5$ ).  **$^1\text{H NMR}$**  (500 MHz,  $\text{CDCl}_3$ )  $\delta$  9.36 (s, 1H), 8.62 (d,  $J = 2.3$  Hz, 1H), 8.30 (s, 1H), 7.74 (t,  $J = 5.7$  Hz, 1H), 7.34 (d,  $J = 7.5$  Hz, 1H), 7.25-7.20 (m, 1H), 7.20-7.05 (m, 8H), 7.01-6.90 (m, 5H), 6.79 (s, 1H), 5.93 (d,  $J = 15.9$  Hz, 1H), 4.52 (dd,  $J = 14.5, 6.2$  Hz, 1H), 4.33 (dd,  $J = 14.5, 5.5$  Hz, 1H), 2.72 (t,  $J = 8.2$  Hz, 2H), 1.70-1.53 (m, 2H), 0.97 (t,  $J = 7.3$  Hz, 3H).  **$^{13}\text{C NMR}$**  (125 MHz,  $\text{CDCl}_3$ )  $\delta$  171.95, 162.61, 150.51, 147.01, 145.79, 144.40, 144.20, 142.45, 141.94, 138.47, 138.29, 136.60, 136.10, 135.96, 131.29, 130.56, 129.55, 129.42, 129.07, 128.61, 128.51, 128.04, 127.58, 127.51, 127.41, 118.64, 41.01, 32.06, 23.57, 14.80. **HRMS (ESI)**  $m/z$  calculated for  $\text{C}_{34}\text{H}_{31}\text{N}_3\text{O}_3\text{Na}$   $[\text{M}+\text{Na}]^+$ : 552.2258, found: 552.2259.

## 6.4 Ester Reduction

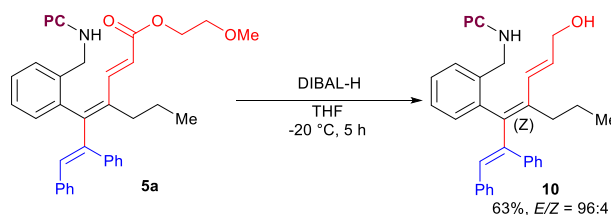

A solution of **5a** (58.8 mg, 0.1 mmol, 1.0 equiv) in THF (0.1 M, 1.0 mL) was cooled down to -20 °C and treated with DIBAL-H (5.0 equiv, 1.5 mol/L in THF). The reaction was stirred for 5 h under -20 °C until the materials are completely consumed. The organic phase was quenched with 1 N hydrochloric acid at -20 °C, and then diluted with water and ethyl acetate. The aqueous phase was extracted with EA. The organic phase was combined and dried over anhydrous Na<sub>2</sub>SO<sub>4</sub>. The EA was removed under reduced pressure. The resulting mixture was purified by silica gel column chromatography (PE: EA = 1: 2). Allyl alcohol **10** was obtained as a colorless oil (32.5 mg, 63% yield, *E/Z* = 95:5)

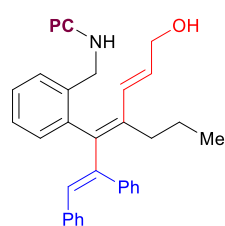

***N*-(2-((1*E*, 3*Z*, 5*E*)-7-Hydroxy-1,3,5-trien-3-yl)benzyl)pyrazine-2-carboxamide (**10**)** According to the above method, **10** was obtained as a colorless oil (32.5 mg, 63% yield, *Z/E* = 95:5). **<sup>1</sup>H NMR** (500 MHz, CDCl<sub>3</sub>) δ 9.42 – 9.36 (m, 1H), 8.72 (d, *J* = 2.3 Hz, 1H), 8.46 – 8.40 (m, 1H), 7.81 (s, 1H), 7.24 – 7.20 (m, 1H), 7.19 – 7.14 (m, 5H), 7.12 – 7.06 (m, 4H), 6.97 (dd, *J* = 6.7, 2.9 Hz, 2H), 6.93 (dd, *J* = 6.5, 3.0 Hz, 2H), 6.74 (s, 1H), 6.04 (d, *J* = 5.4 Hz, 2H), 4.64 (dd, *J* = 15.2, 6.9 Hz, 1H), 4.16 – 4.03 (m, 3H), 2.81 – 2.67 (m, 2H), 1.76 – 1.58 (m, 2H), 0.99 (t, *J* = 7.3 Hz, 3H). **<sup>13</sup>C NMR** (125 MHz, CDCl<sub>3</sub>) δ 162.78, 147.33, 144.63, 144.34, 142.81, 142.36, 141.70, 139.28, 138.84, 136.77, 136.53, 136.36, 130.83, 130.28, 130.08, 129.81, 129.35, 129.01, 128.41, 127.97, 127.69, 127.44, 127.23, 127.15, 126.95, 63.66, 40.87, 32.38, 23.84, 14.91. **HRMS (ESI)** *m/z* calculated for C<sub>34</sub>H<sub>33</sub>N<sub>3</sub>O<sub>2</sub>Na [M+Na]<sup>+</sup>: 538.2465, found: 538.2464

## 6.5 Proposed Mechanism

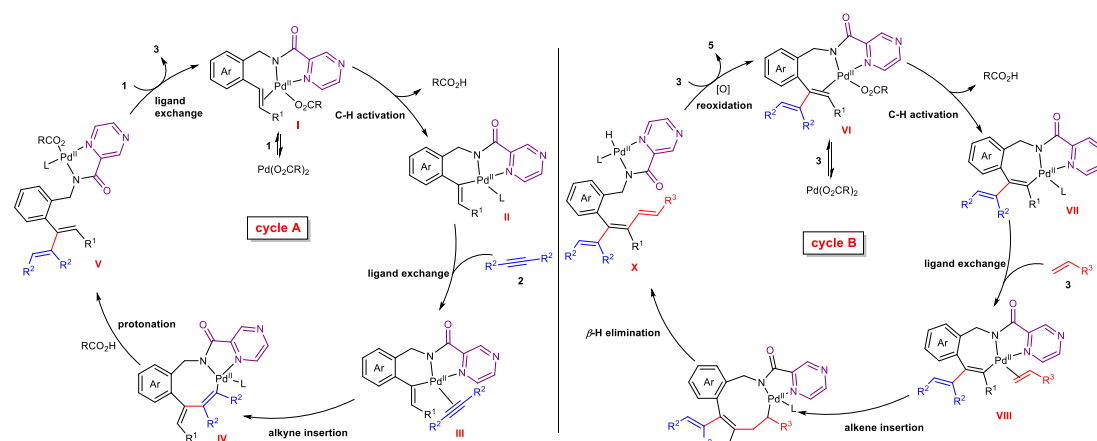

Plausible catalytic cycles are shown in Scheme 4. In  $\alpha$  C–H functionalization of E-aryl alkenes, N,N-bidentate chelation assisted insertion of Pd(II) into the  $\alpha$  C–H bond of E-styrene 1 results in six-membered exo-palladacycle species II. Then II coordinates with alkyne 2 and undergoes 1,2-migratory insertion, followed by protonation to generate the hydro-alkenylation product 3 (Scheme 4, cycle A). Functional-group-directed insertion of Pd(II) into the  $\beta$  C–H bond of diene 3 results in seven-membered endo-palladacycle species VII. Then VII coordinates with alkene 4 and undergoes 1,2-migratory insertion, followed by  $\beta$ -hydride elimination to generate triene product 5. Pd(0) is then re-oxidized by MnO<sub>2</sub> and re-enters the next catalytic cycle (cycle B).

## 6.6 Photophysical Properties

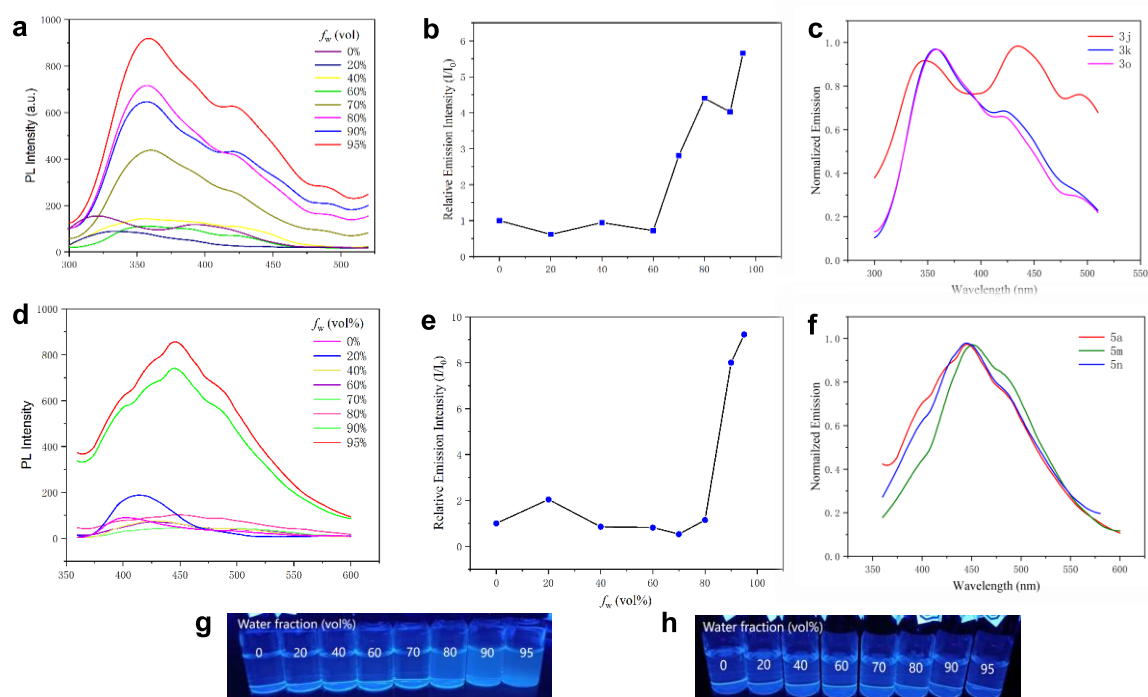

**Figure S1.** Photophysical Property Test. (a) Emission spectra of **3o** obtained at different water fractions of the 1,4-dioxane/ H<sub>2</sub>O mixtures. (b) Relative emission intensity of compound **3o** in 1,4-dioxane/H<sub>2</sub>O mixture with increasing water fractions (fw) to 95% (c = 150  $\mu$ M,  $\lambda_{ex}$  = 269 nm,  $\lambda_{em}$  = 365 nm). (c) Normalized fluorescence emission spectra in 1,4-dioxane/water mixtures (c = 150  $\mu$ M, 95% water) of dienes **3**. (d) Emission spectra of **5a** obtained at different water fractions of the 1,4-dioxane/H<sub>2</sub>O mixtures. (e) Relative emission intensity of **5a** in 1,4-dioxane/H<sub>2</sub>O mixture with increasing water fractions (fw) to 95% (c = 150  $\mu$ M,  $\lambda_{ex}$  = 320 nm,  $\lambda_{em}$  = 445 nm). (f) Normalized fluorescence emission spectra in 1,4-dioxane/H<sub>2</sub>O mixtures (c = 150  $\mu$ M, 95% water) of trienes **5**. (g) **3o** (c = 150  $\mu$ M) in 1,4-dioxane/water mixtures with different volume fractions of H<sub>2</sub>O. (h) **5a** (c = 150  $\mu$ M) in 1,4-dioxane/H<sub>2</sub>O mixtures with different volume fractions of H<sub>2</sub>O.

With the library of these tetrasubstituted dienes **3** and trienes **5** in hand, we then examined their photophysical properties. Although compound **3o** and **5a** showed almost no fluorescence in 1,4-dioxane, the emission intensity increased gradually with the increasing of water fraction. Notably, the emission intensity of **3o** and **5a** increased significantly when water fraction exceeded 95% due to the restriction of intra-molecular rotation (Fig. 1a, b, d, e). Polyenes bearing electro-withdrawing and electro-donating groups were measured by fluorescence emission spectra, and the emission maxima of all the AIE-gens altered from 356 to 436 nm and 447 to 451 nm (Fig. 1f). The results showed that the substituents on alkyne **2** and functionality on benzyl amides **1** were vital for the AIE-activity of the polyene products. In this regard, these dienes exhibited potential applications in OLEDs and living animal imaging by structural derivations.

## References

- [1] Kabalka, G. W.; Tejedor, D.; Li, N.-S.; Malladi, R. R.; Trotman, S. *J. Org. Chem.* **1998**, *63*, 6438-6439.
- [2] Choi, S.-Y.; Kim, H. D.; Park, J.-U.; Park, S.; Kim, J.-H. *Org. Lett.* **2019**, *21*, 10038-10042.
- [3] Schreib, B. S.; Carreira, E. M. *J. Am. Chem. Soc.* **2019**, *141*, 8758-8763.
- [4] Xie, H.; Ye, Z.; Ke, Z.; Lan, J.; Jiang, H.; Zeng, W. *Chem. Sci.* **2018**, *9*, 985-989.
- [5] Feng, C.; Loh, T.-P. *Org. Lett.* **2014**, *16*, 3444-3447.
- [6] Zhang, T.; Luan, Y.-X.; Zheng, S.-J.; Peng, Q.; Ye, M. *Angew. Chem. Int. Ed.* **2020**, *59*, 7439-7443.
- [7] Hemric, B. N.; Shen, K.; Wang, Q. *J. Am. Chem. Soc.* **2016**, *138*, 5813-816.
- [8] Braddock, D. C.; Cansell, G.; and Hermitage, *Chem. Commun.* **2006**, *23*, 2483-2485.
- [9] Vyvyan, J. R.; Holst, C. L.; Johnson, A. J.; Schwenk, C. M. *J. Org. Chem.* **2002**, *67*, 2263-2265.
- [10] Wei, W.; Liao, L.; Qin, T.; Zhao, X. *Org. Lett.* **2019**, *21*, 7846-7850.
- [11] Shen, C.; Zhu, Y.; Jin, S.; Xu, K.; Luo, S.; Xu, L.; Zhong, G.; Zhong, Li.; Zhang, J. *Org. Chem. Front.* **2022**, *9*, 989-994.

## 8. NMR Spectra

### 8.1 NMR Spectra of the Products 3

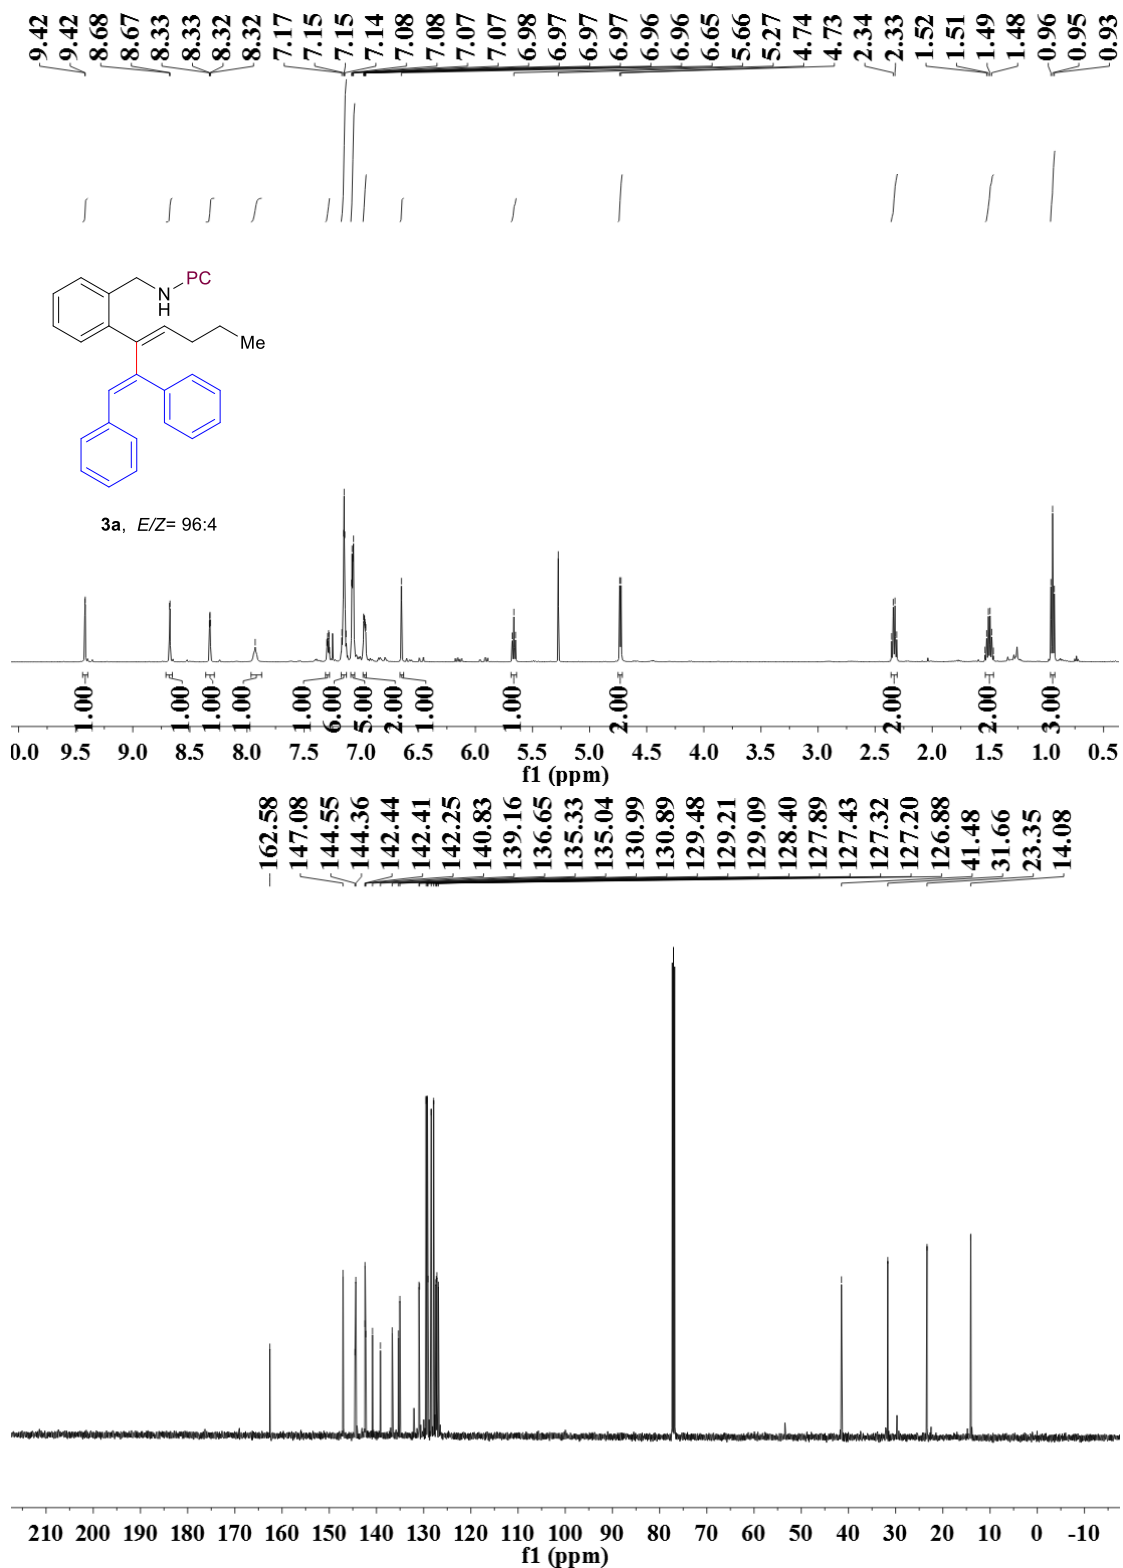

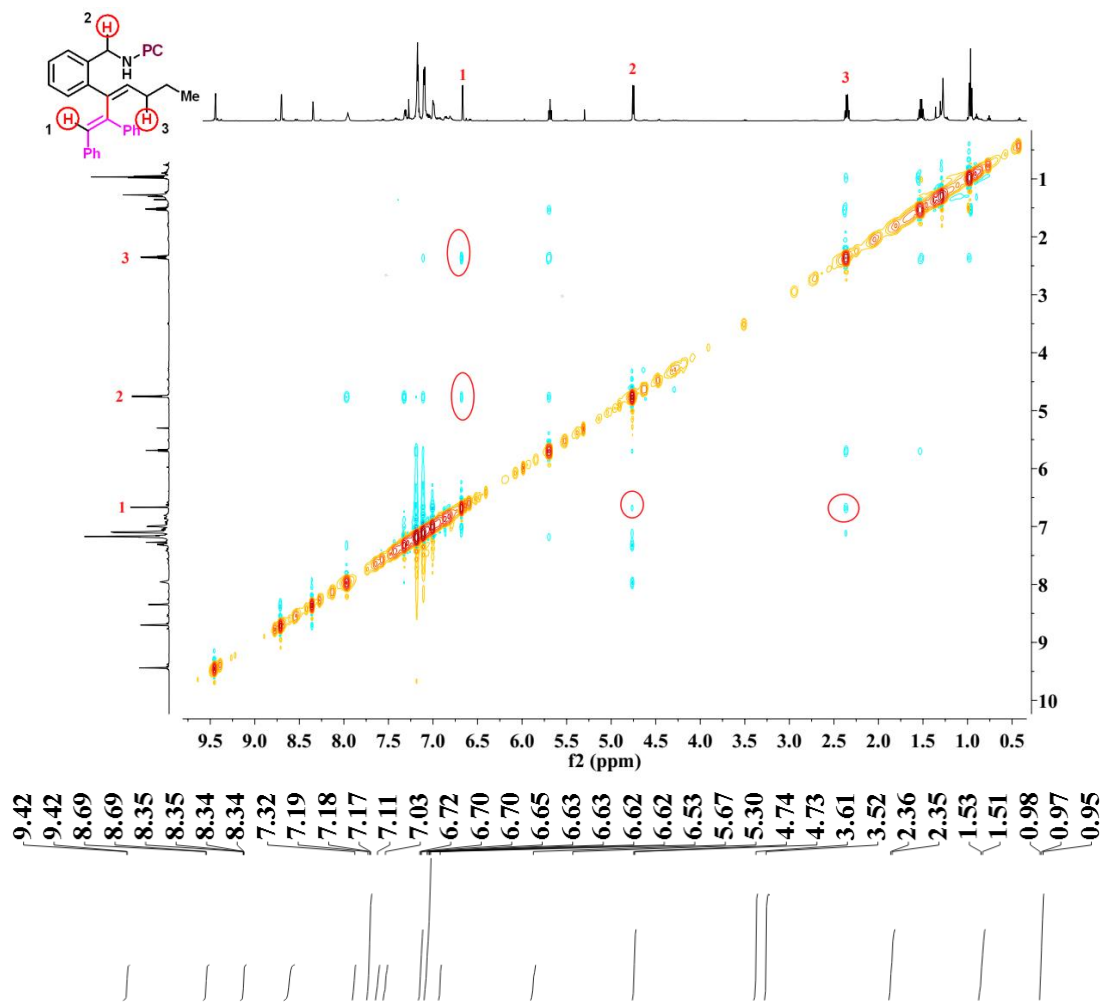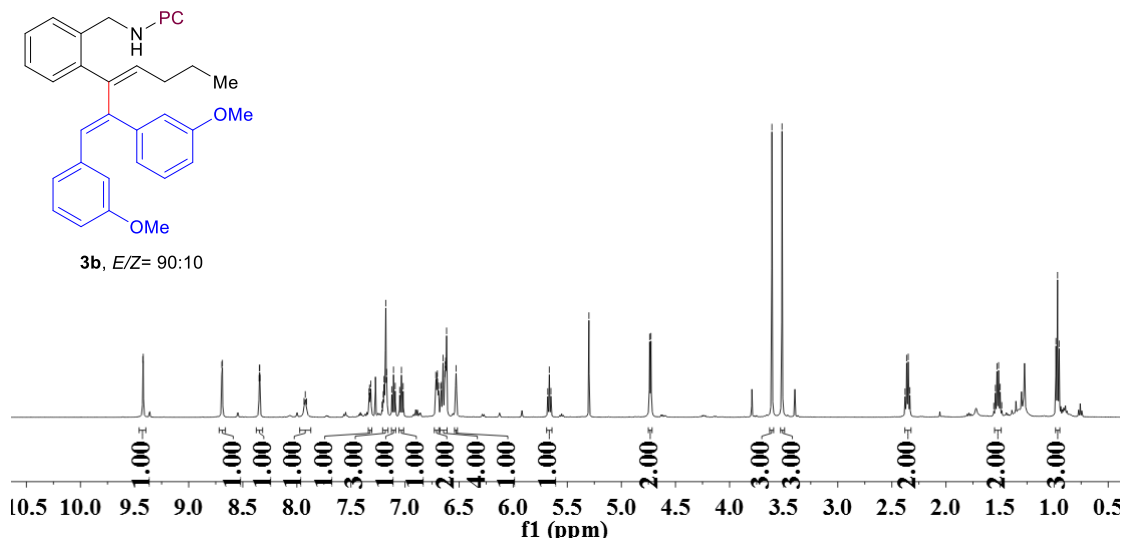

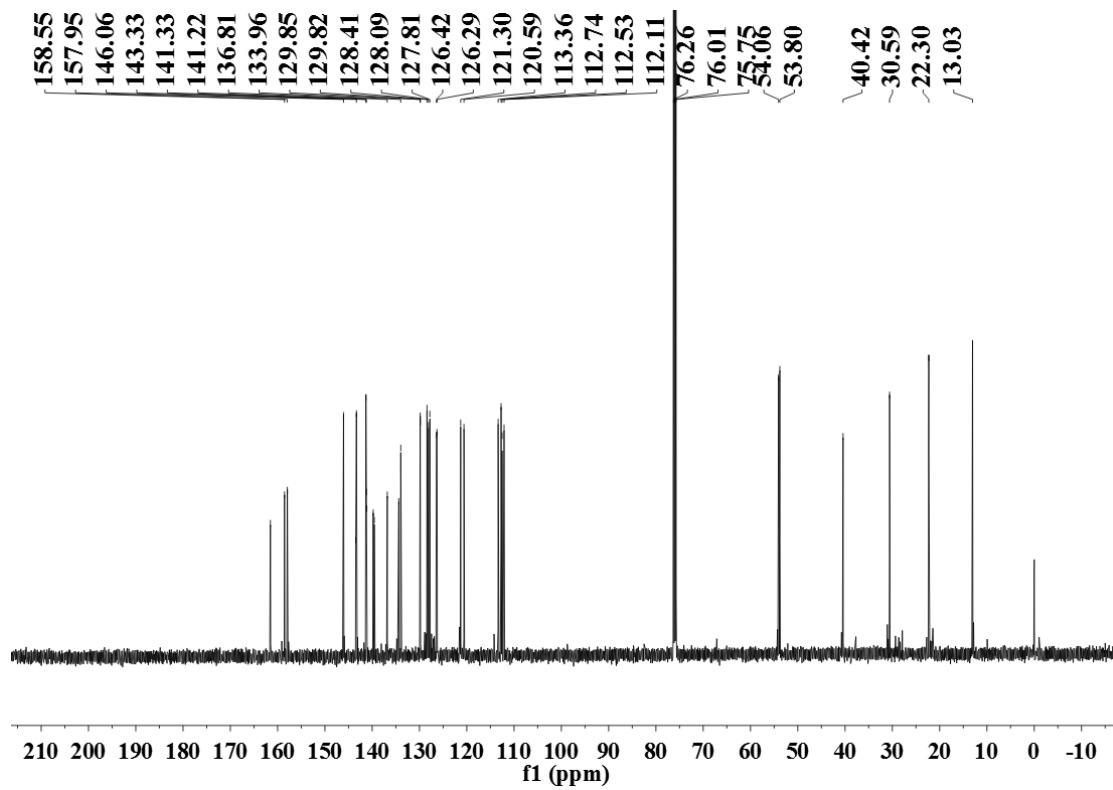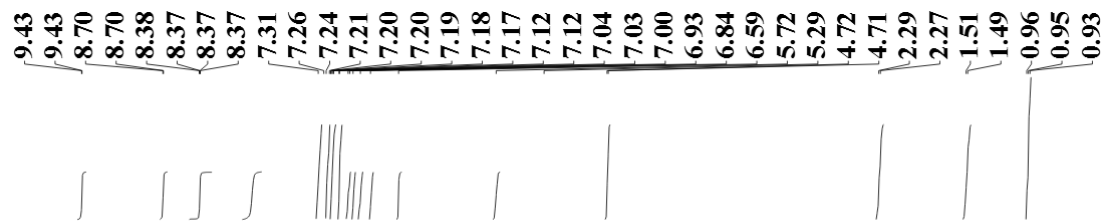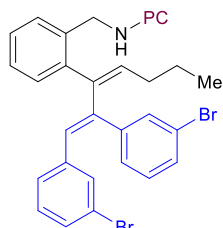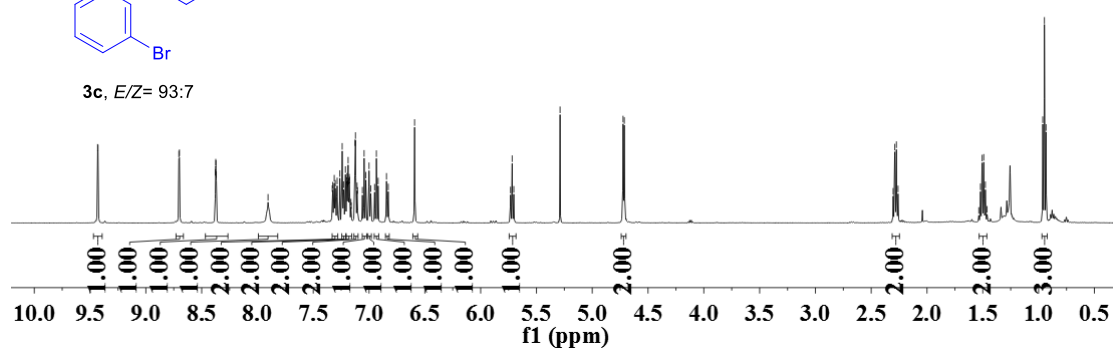

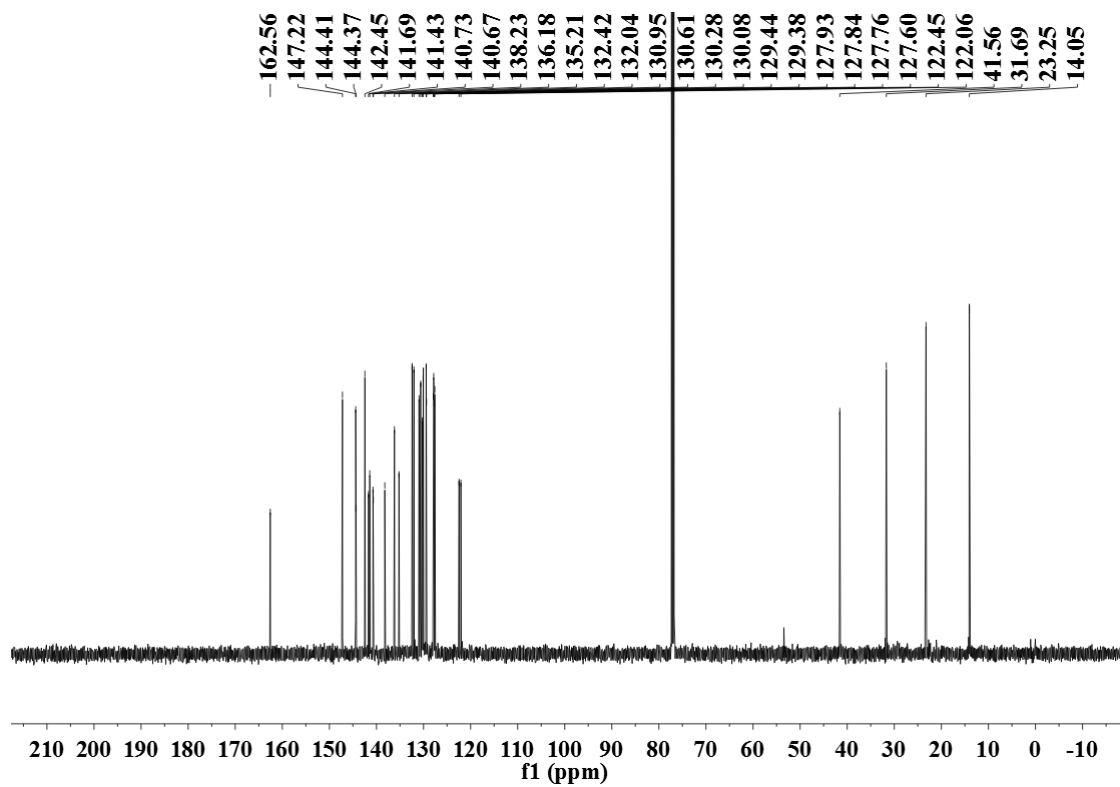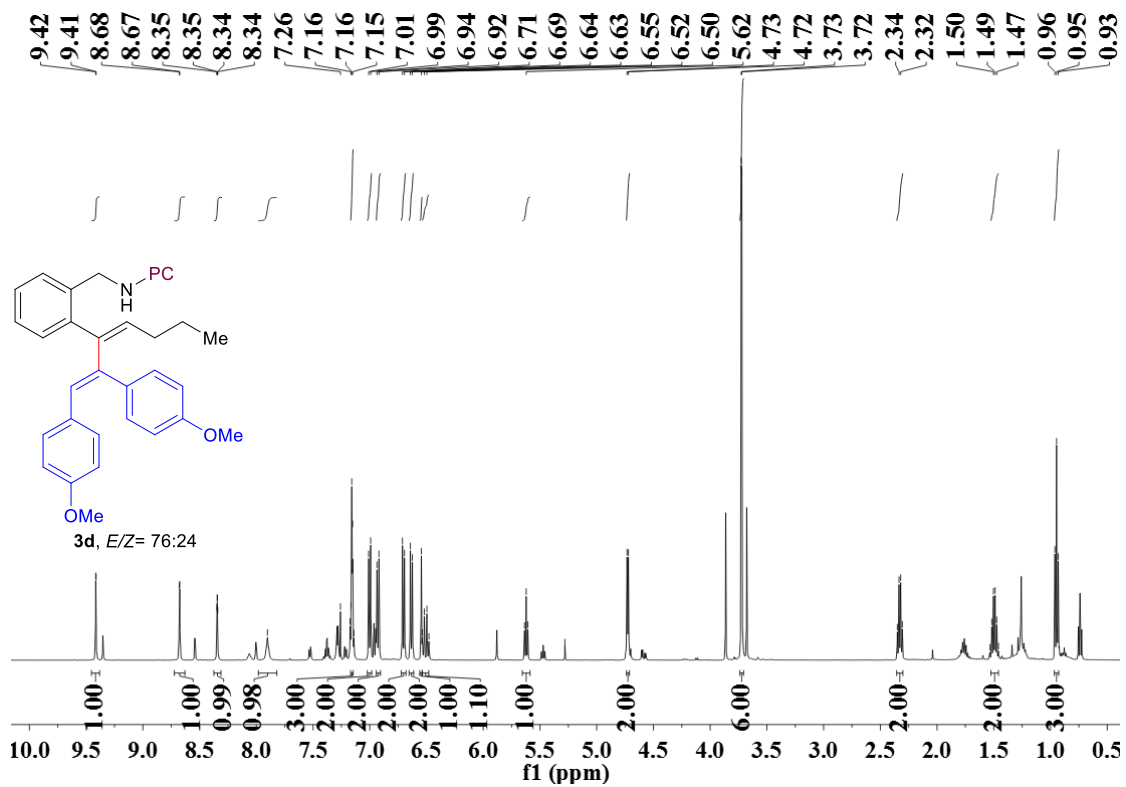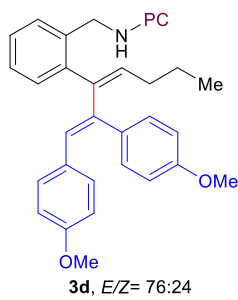



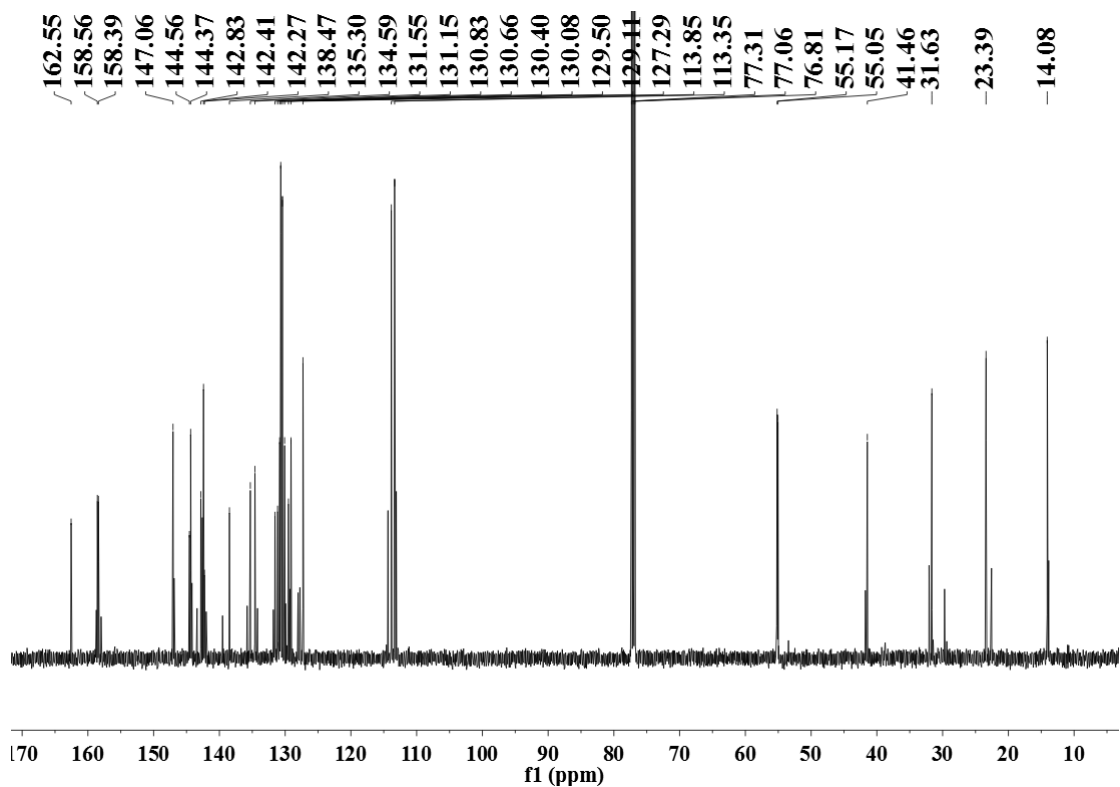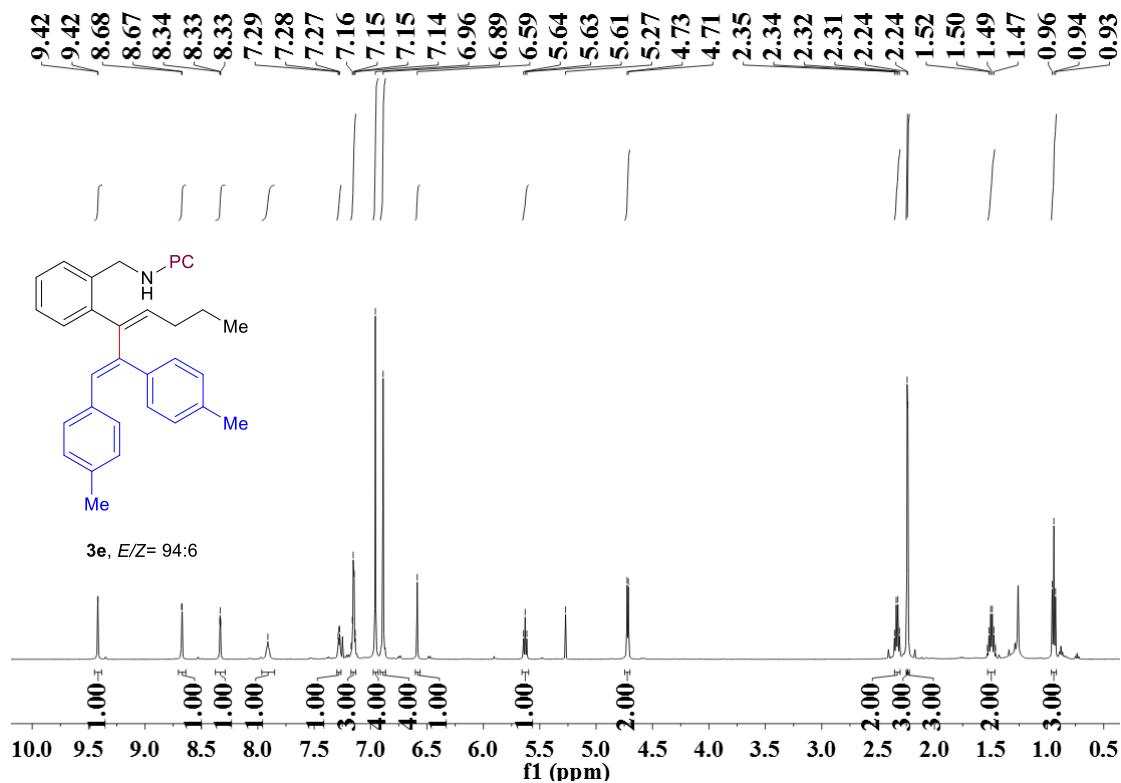

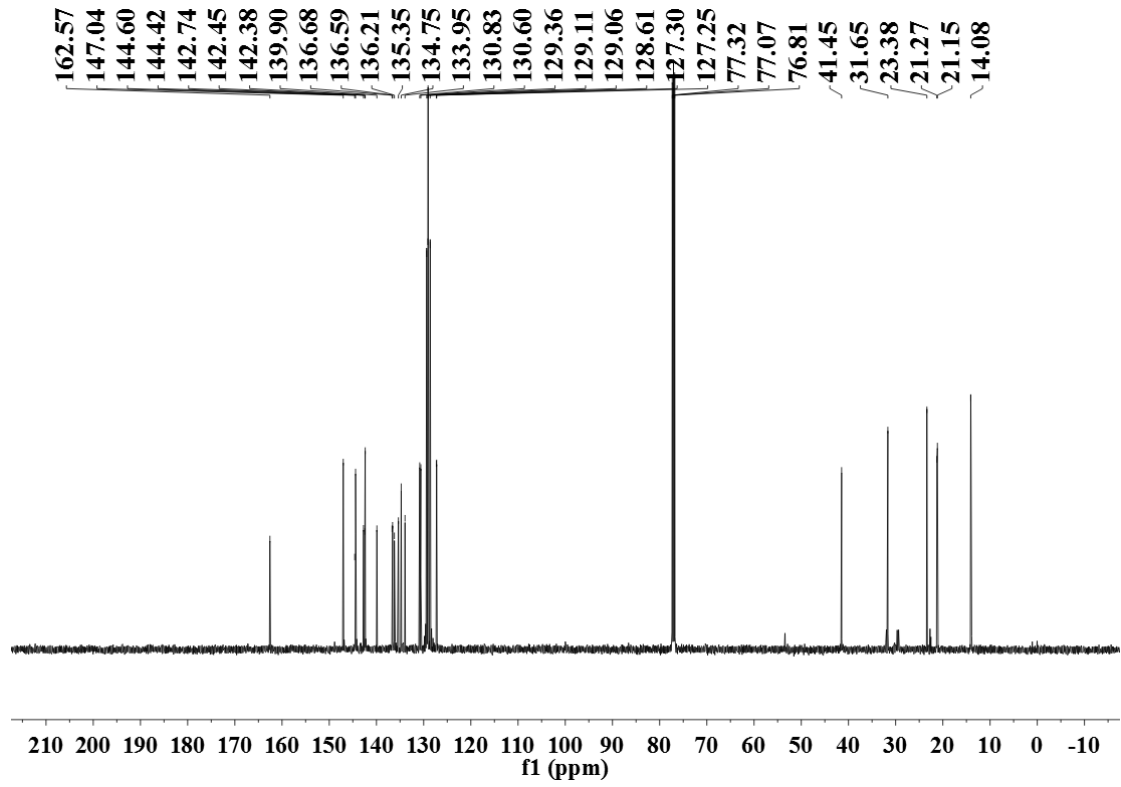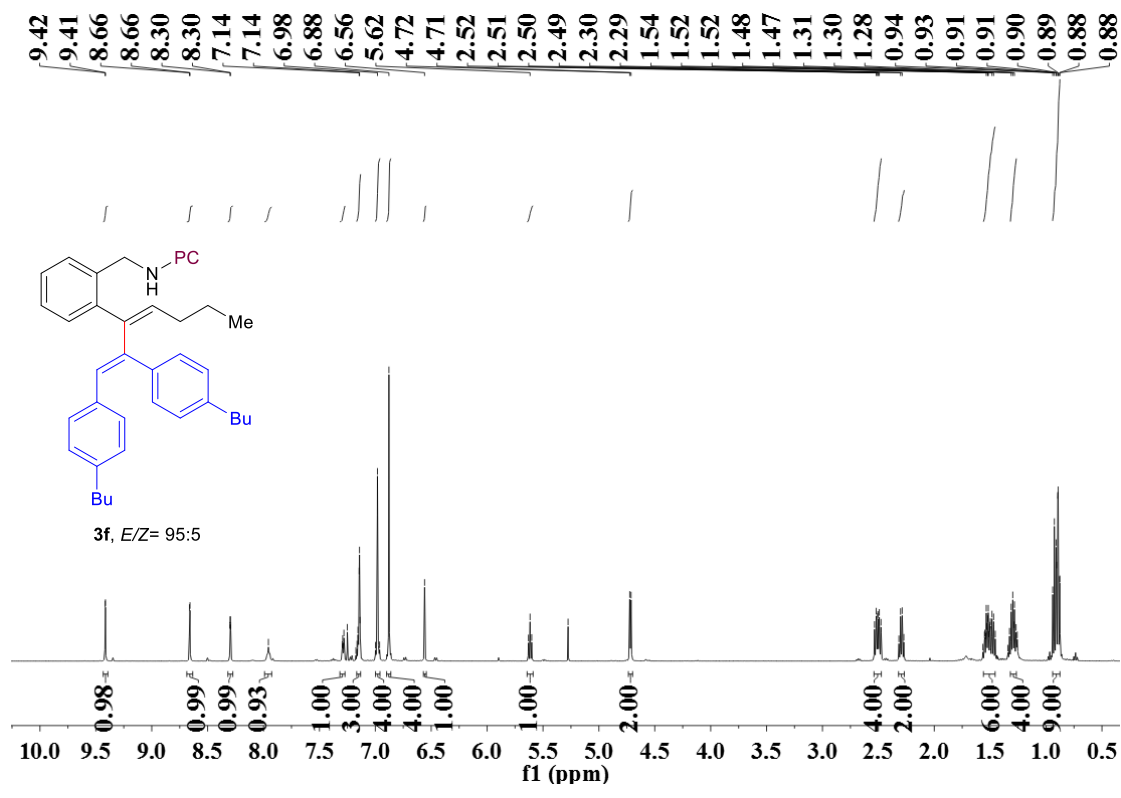

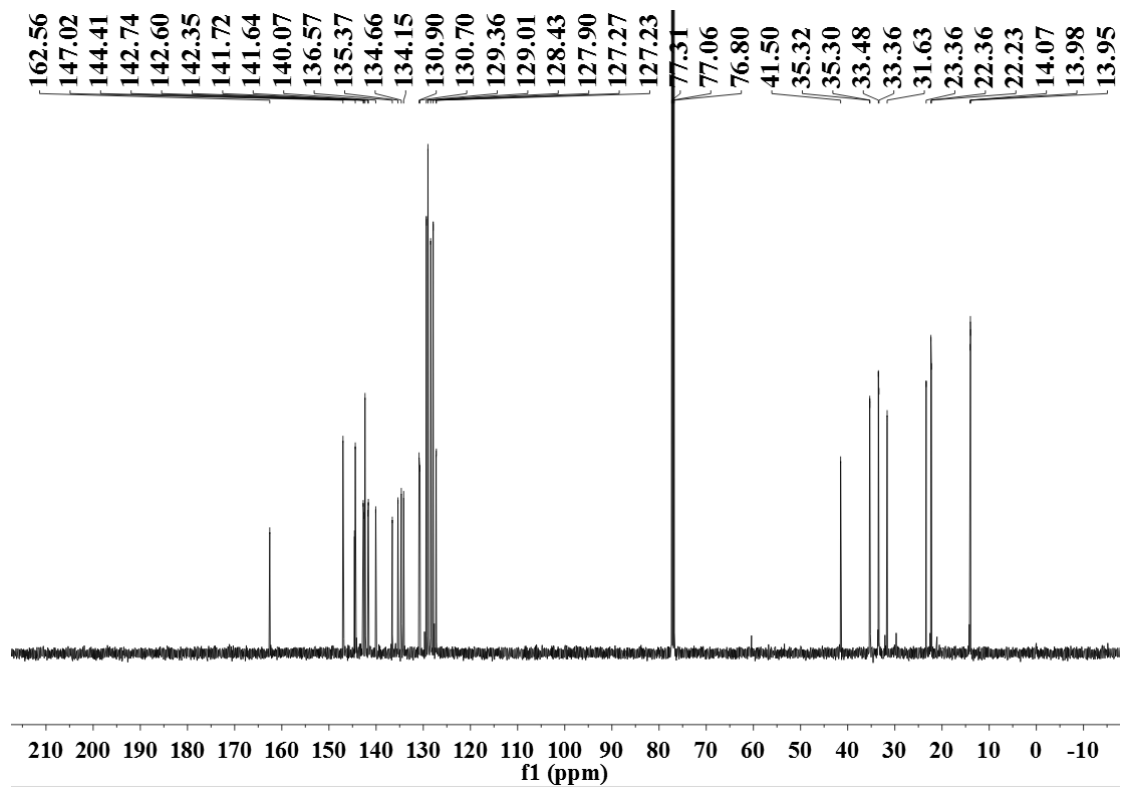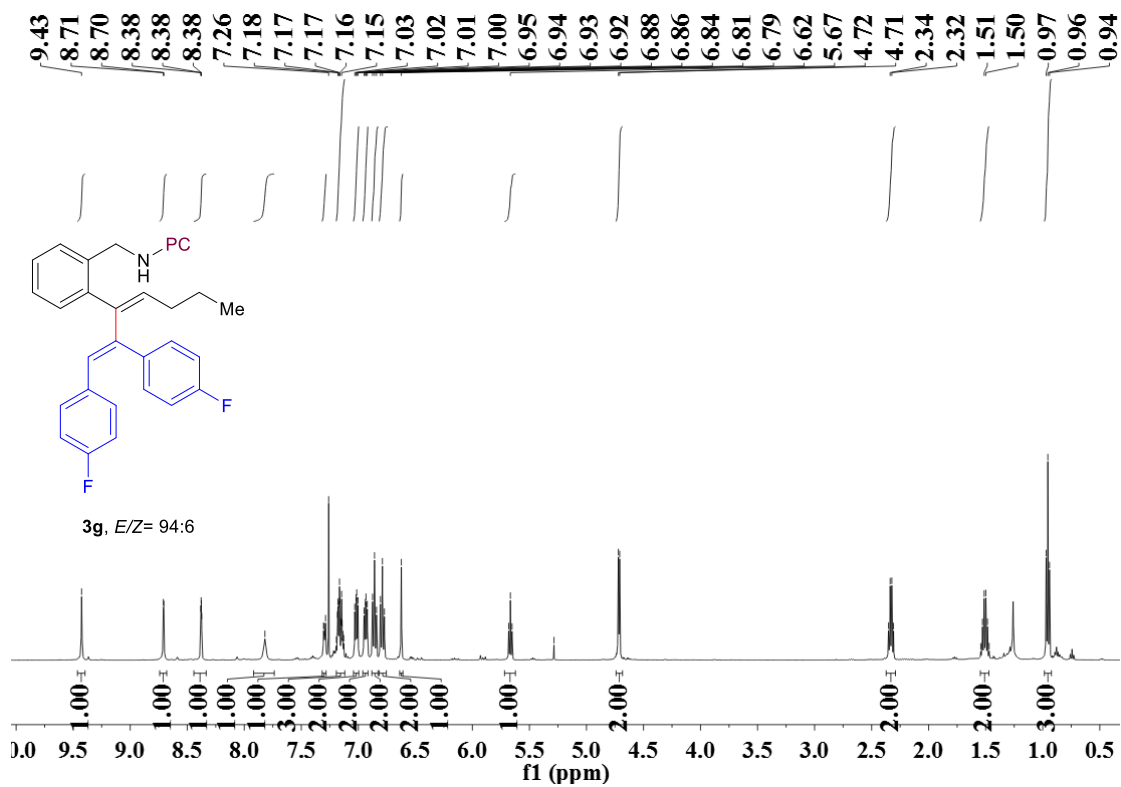

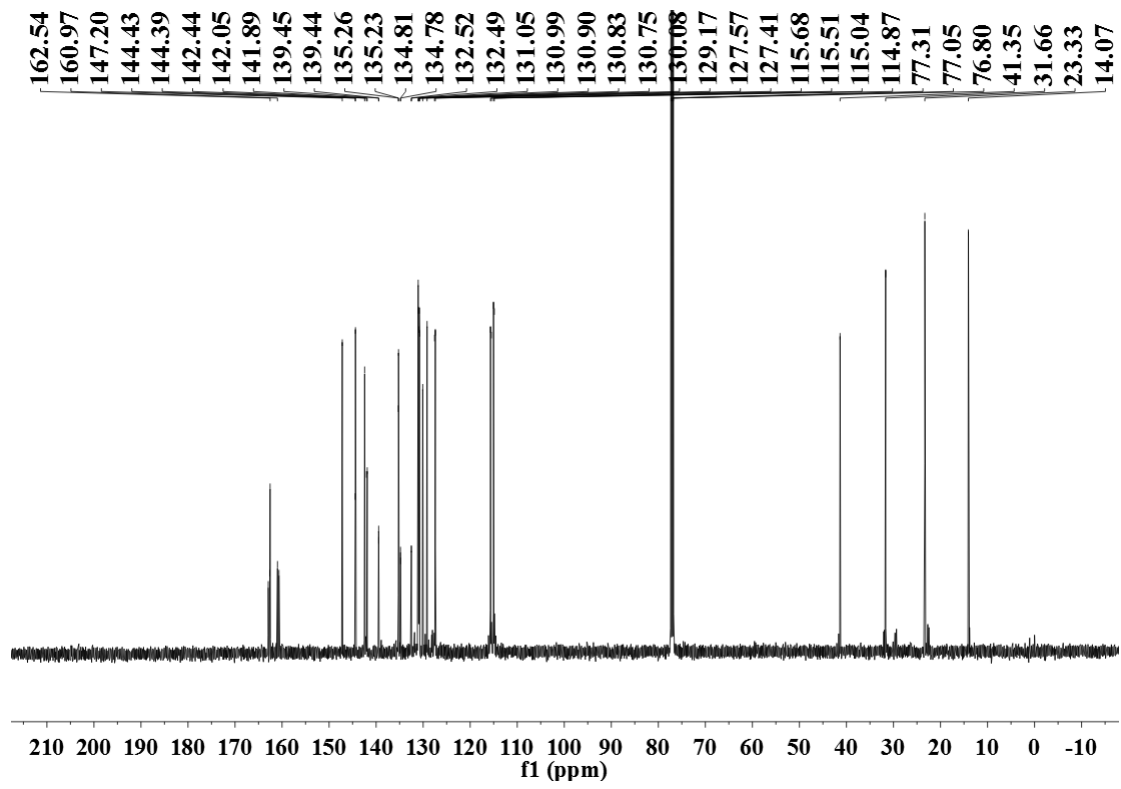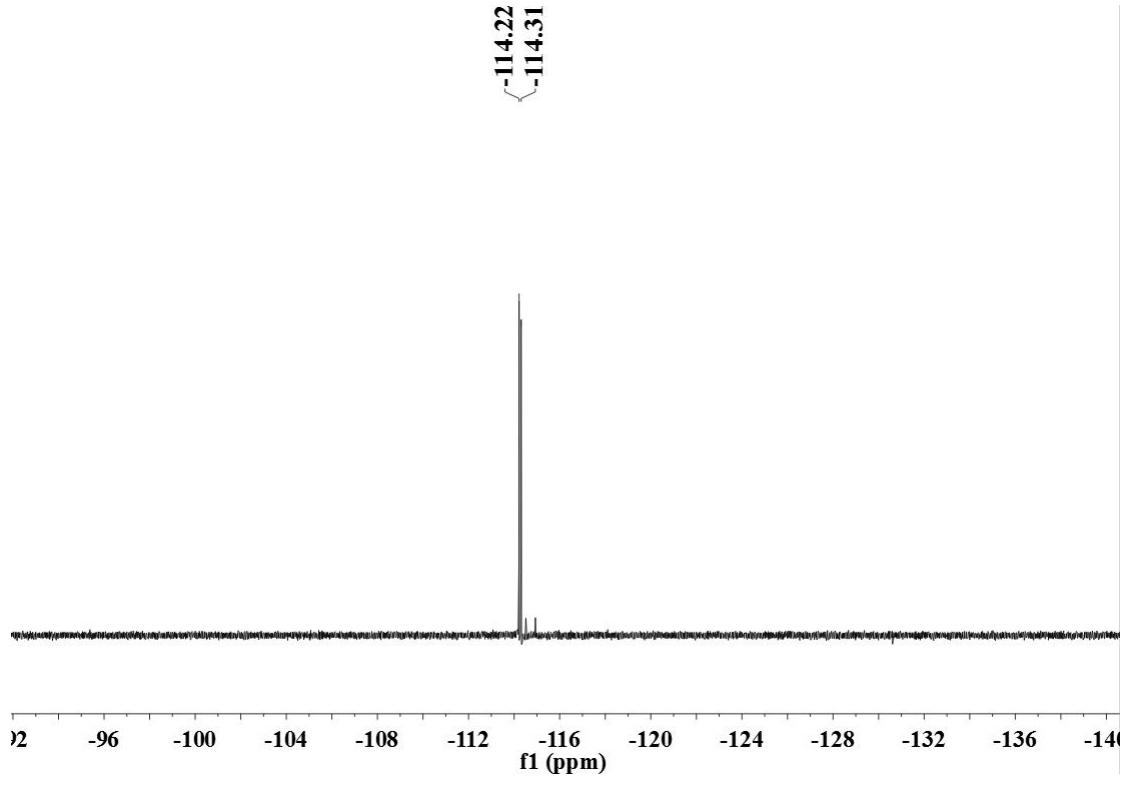

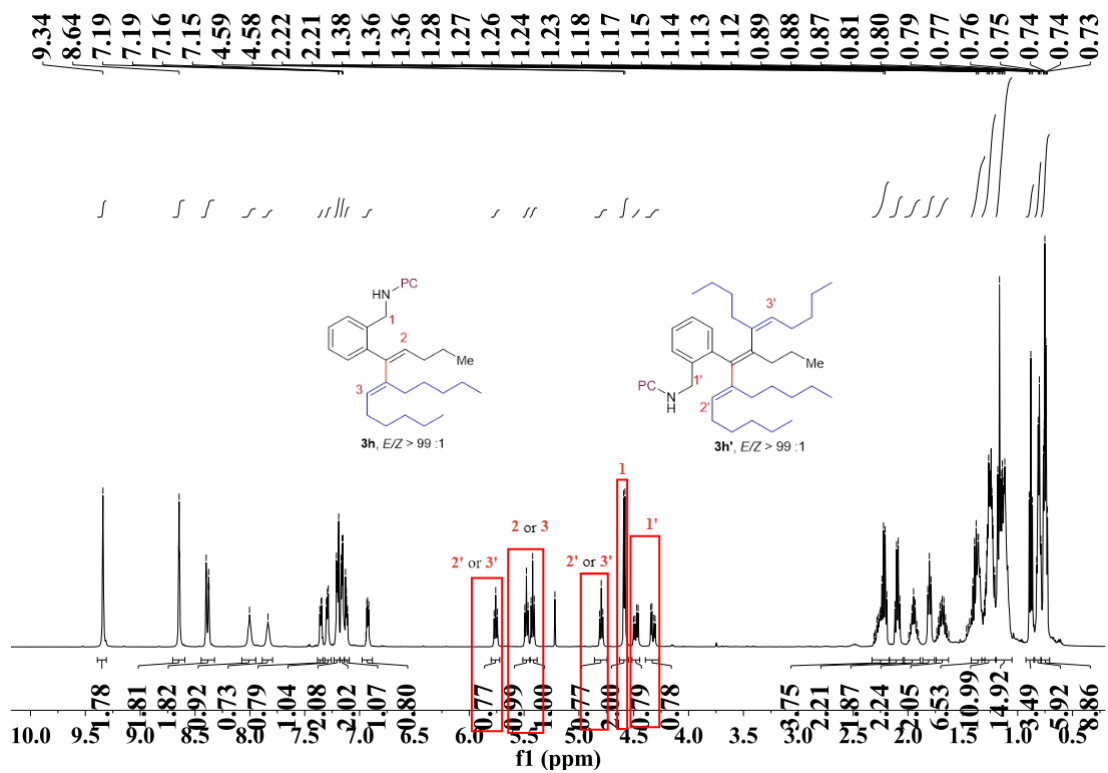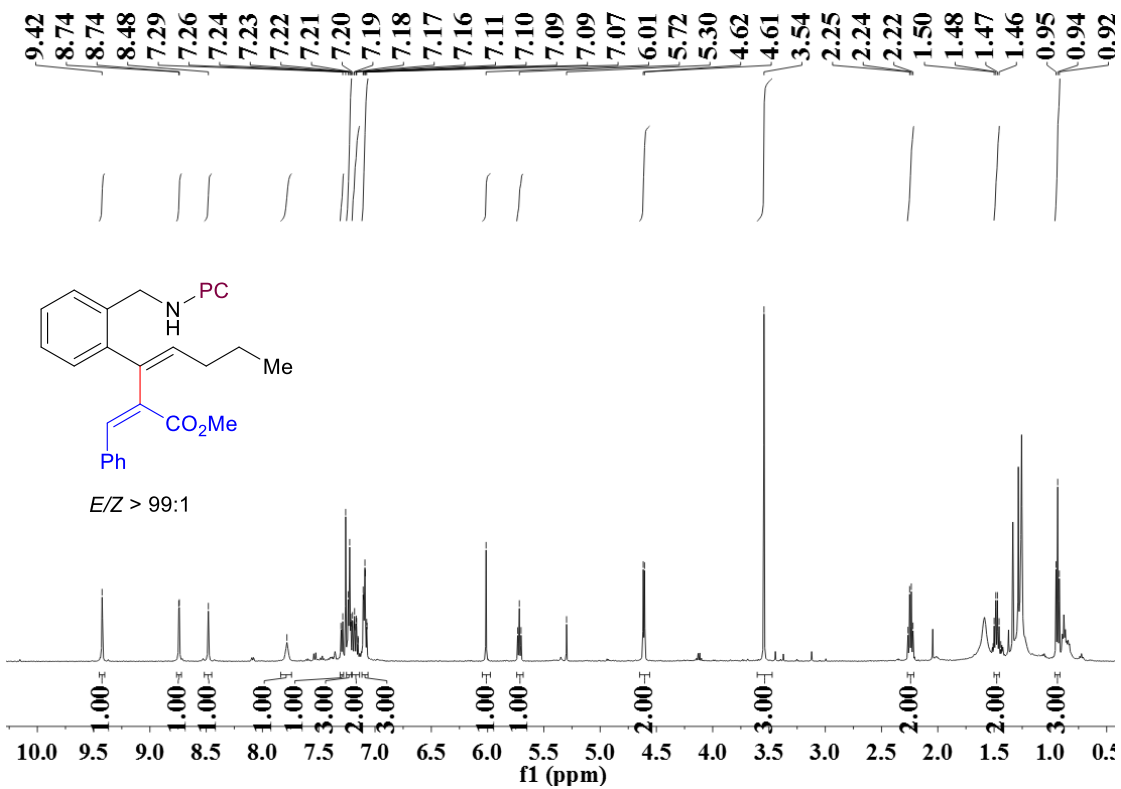

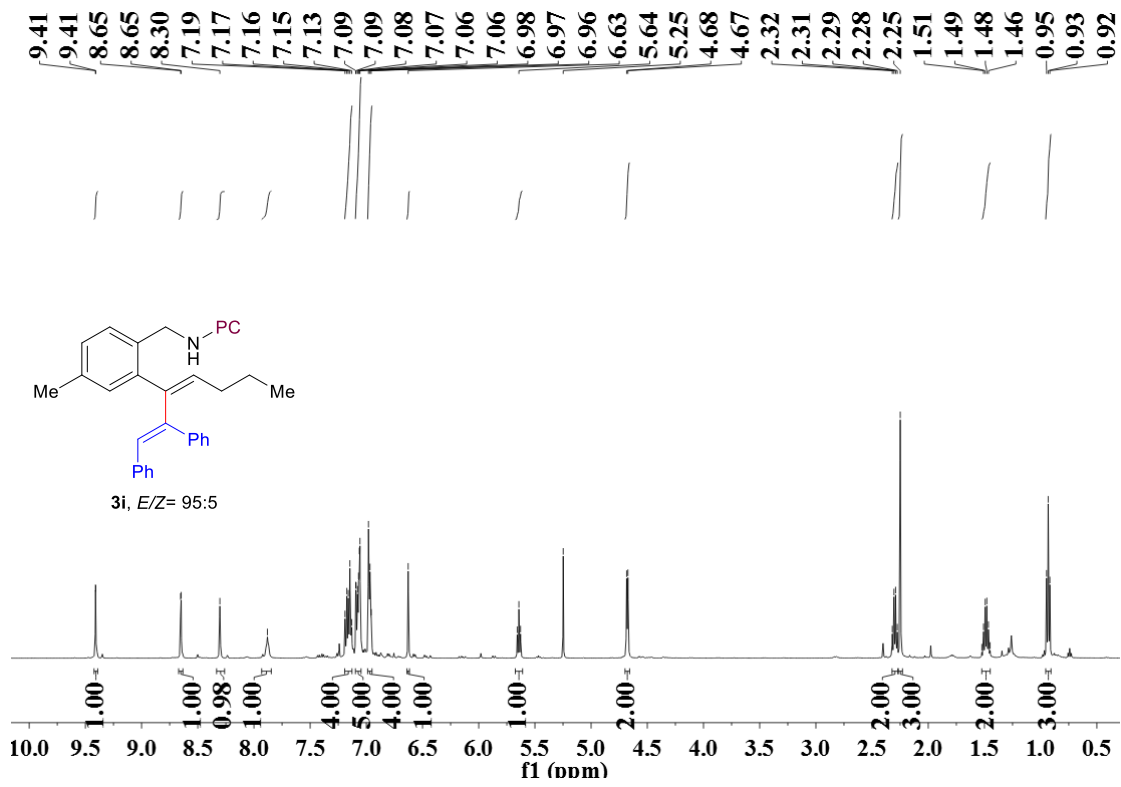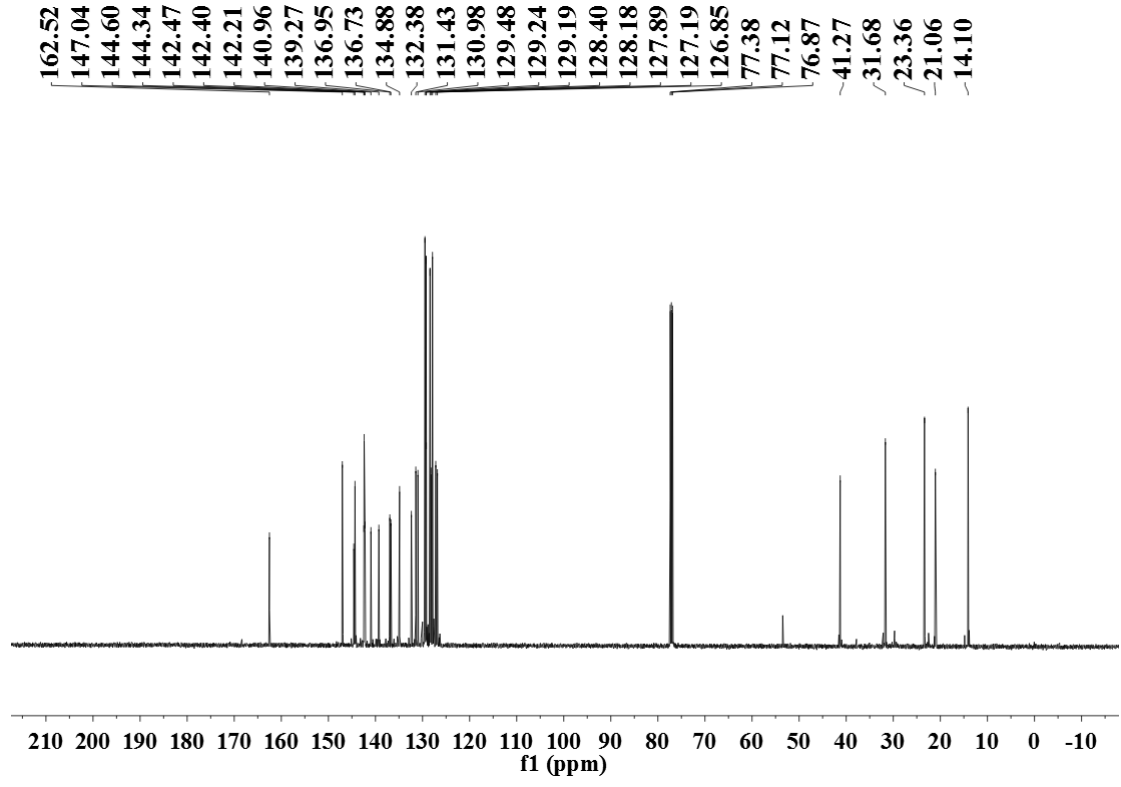

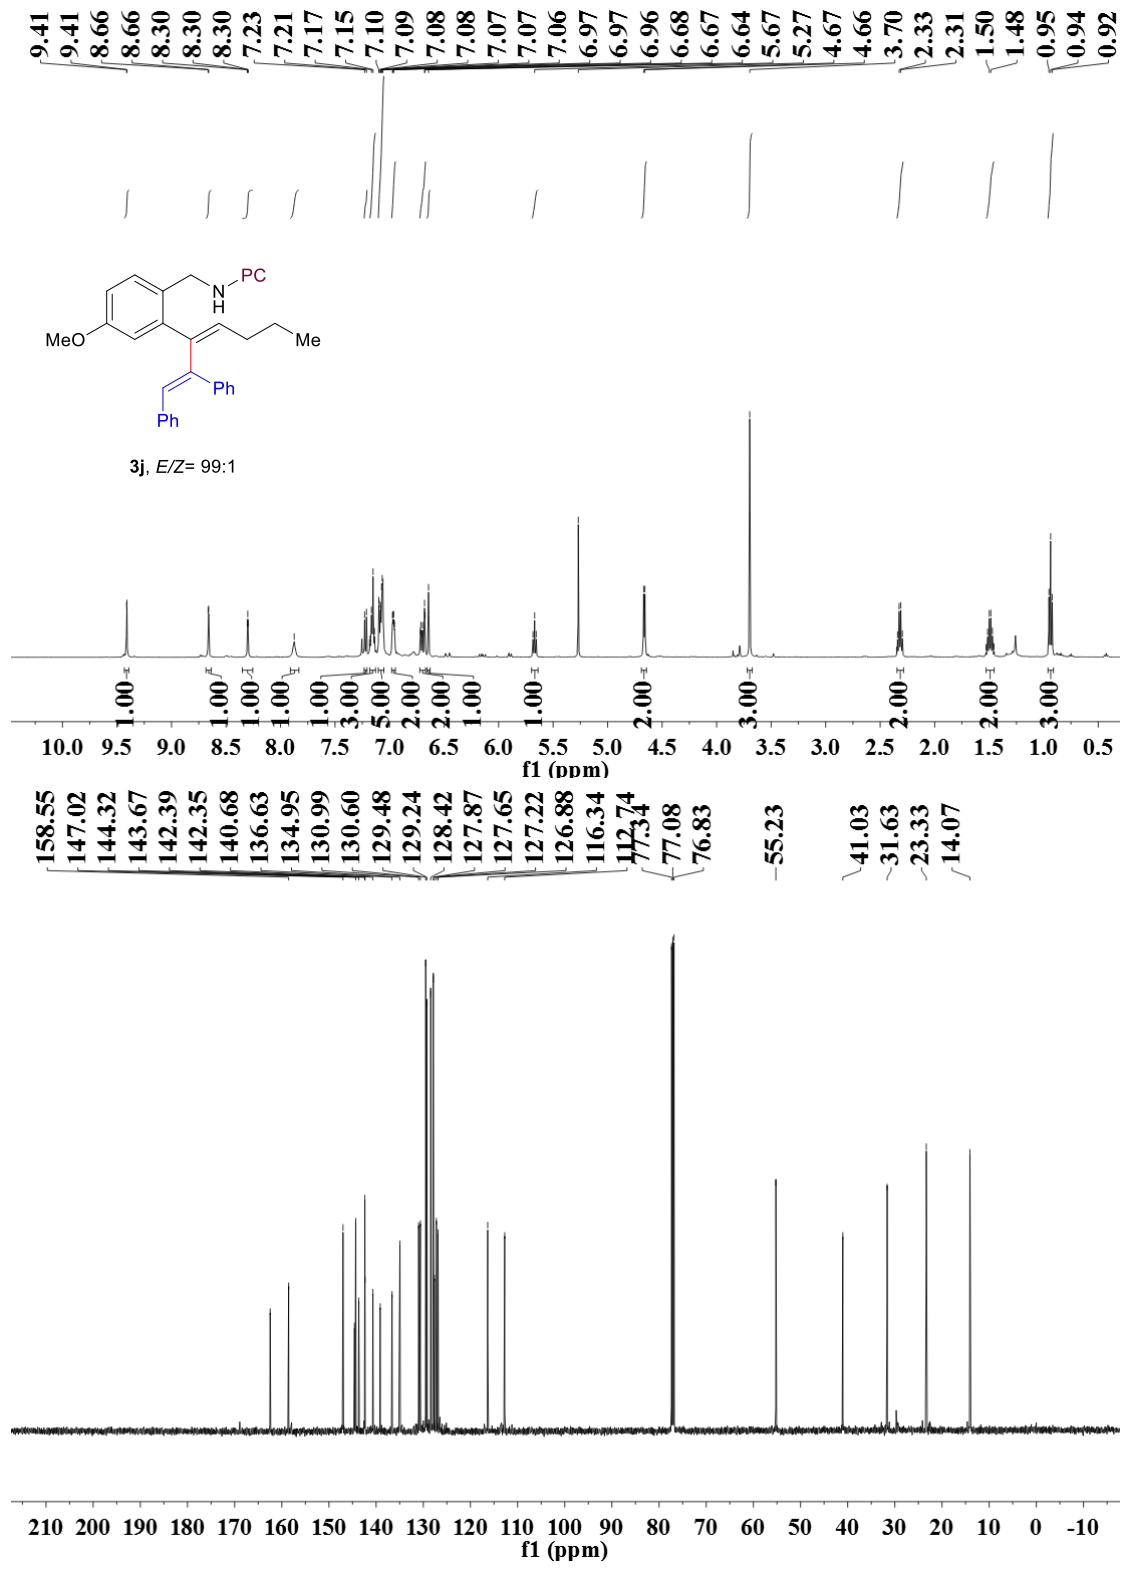

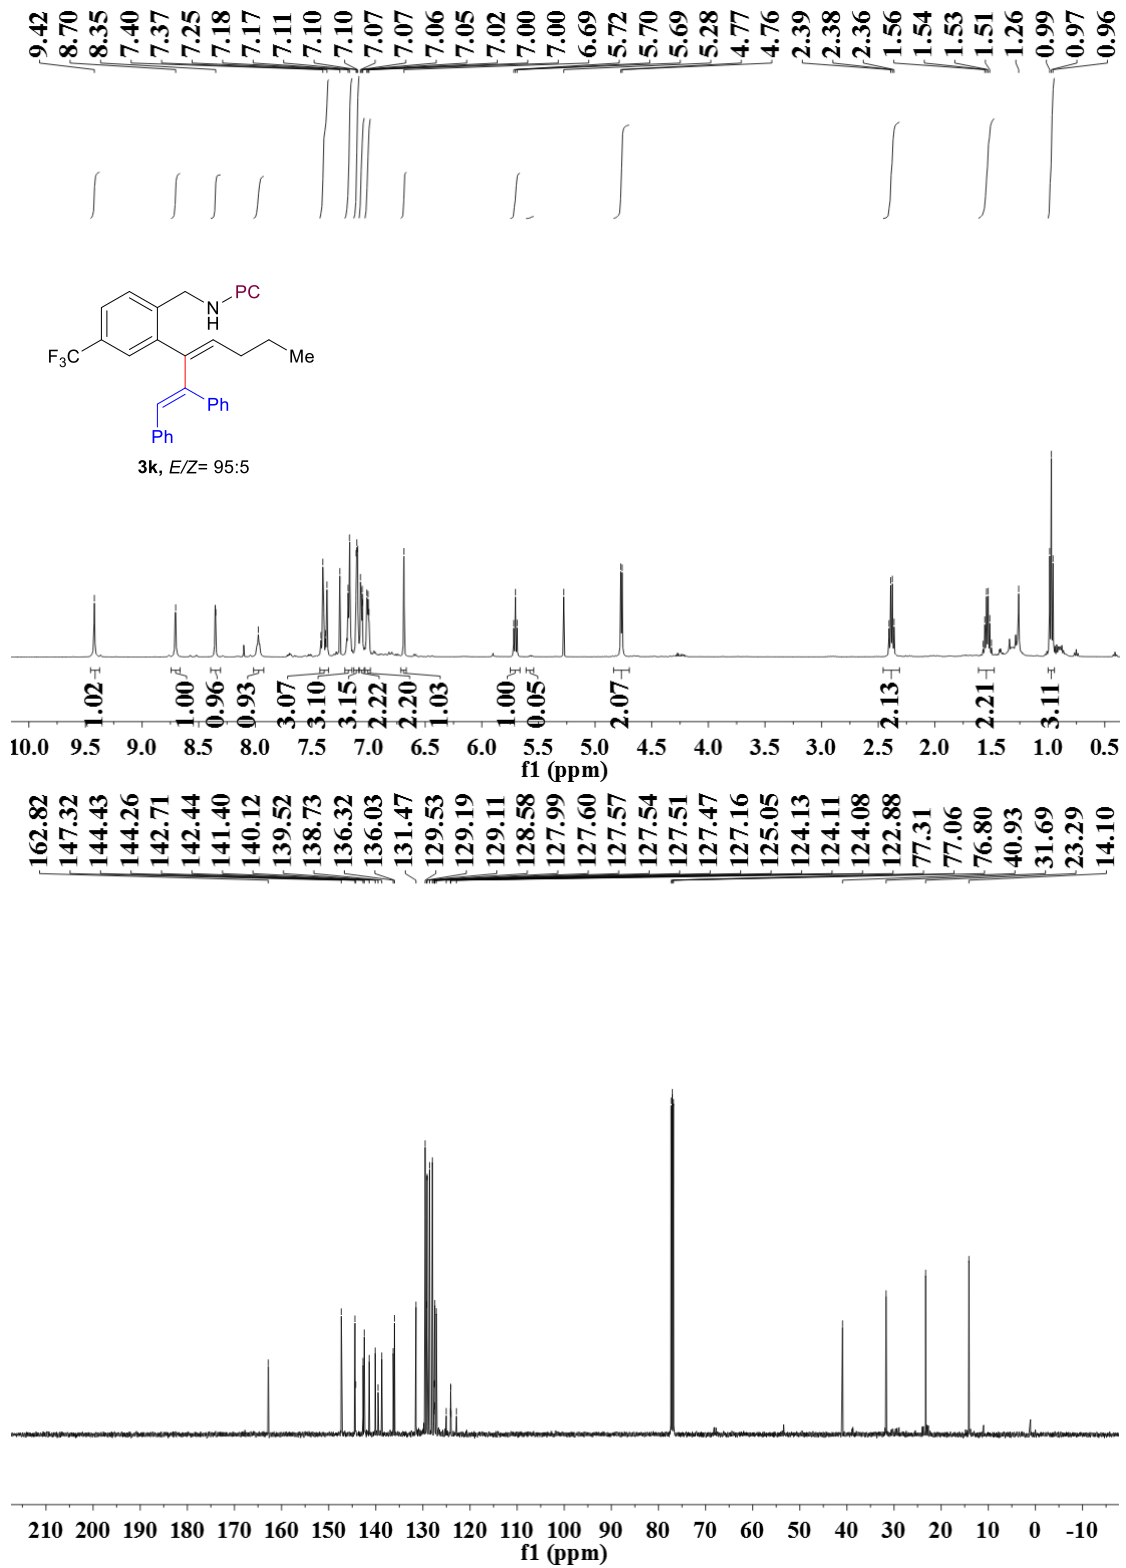



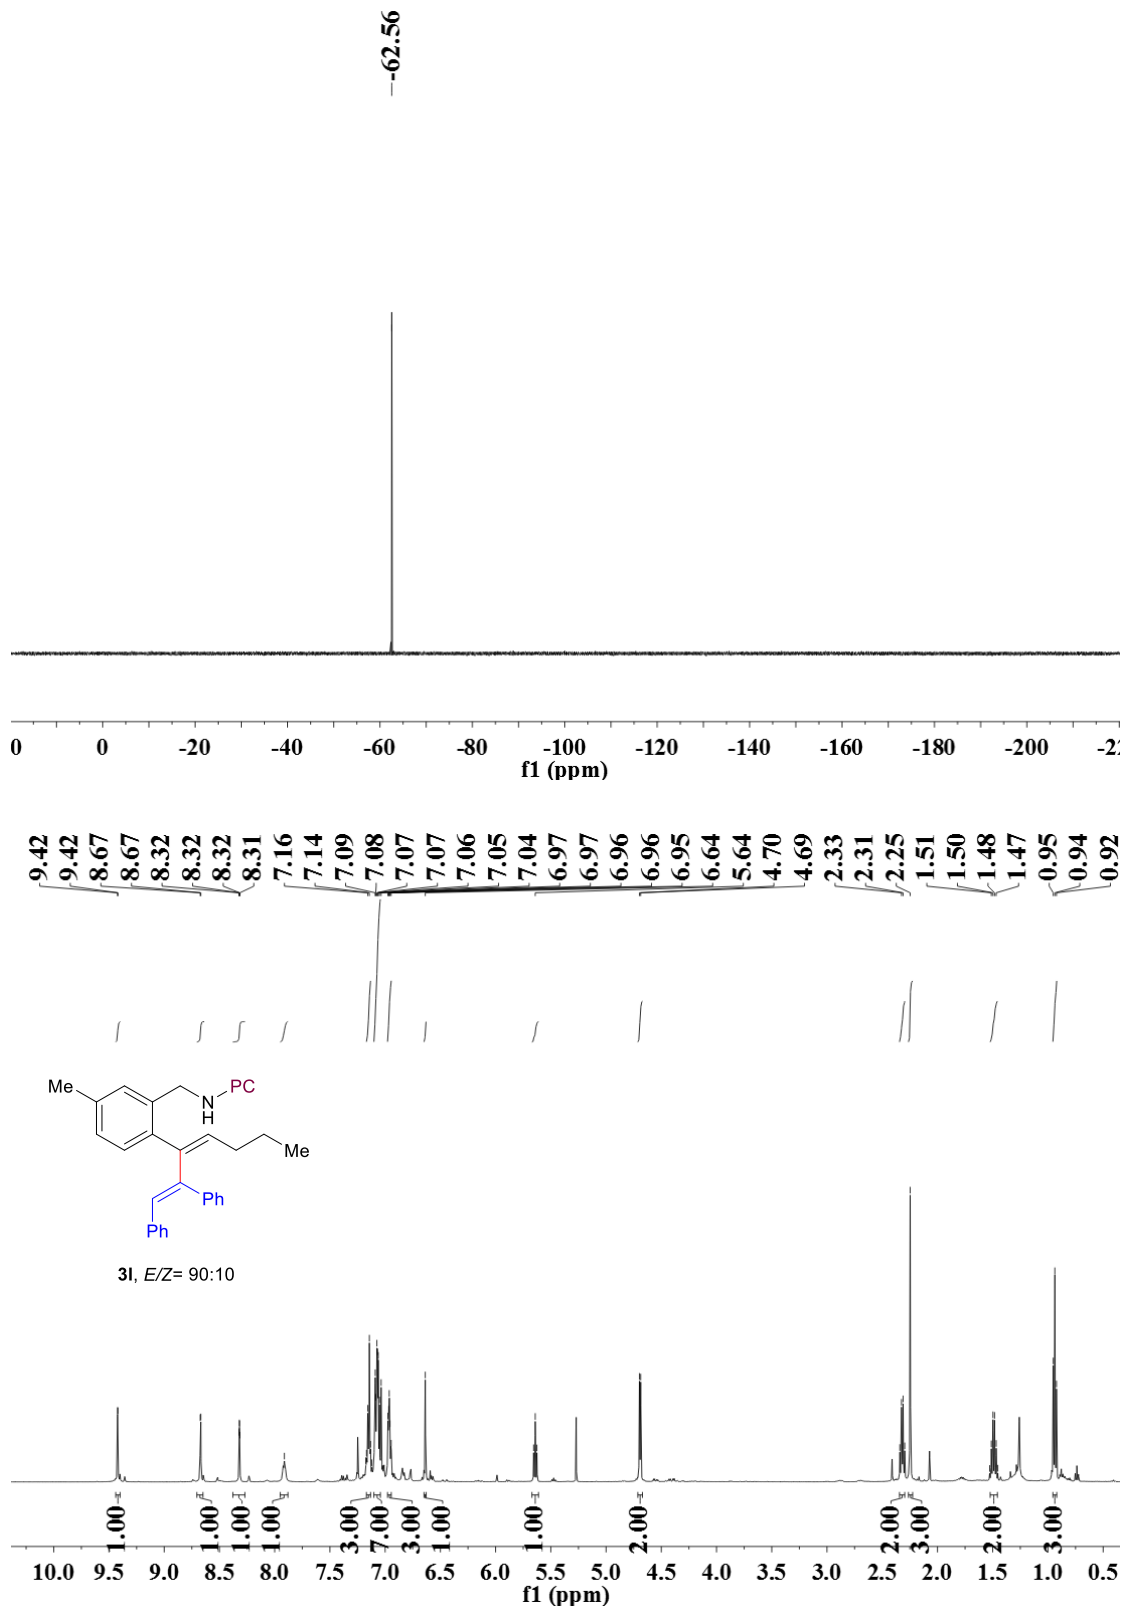

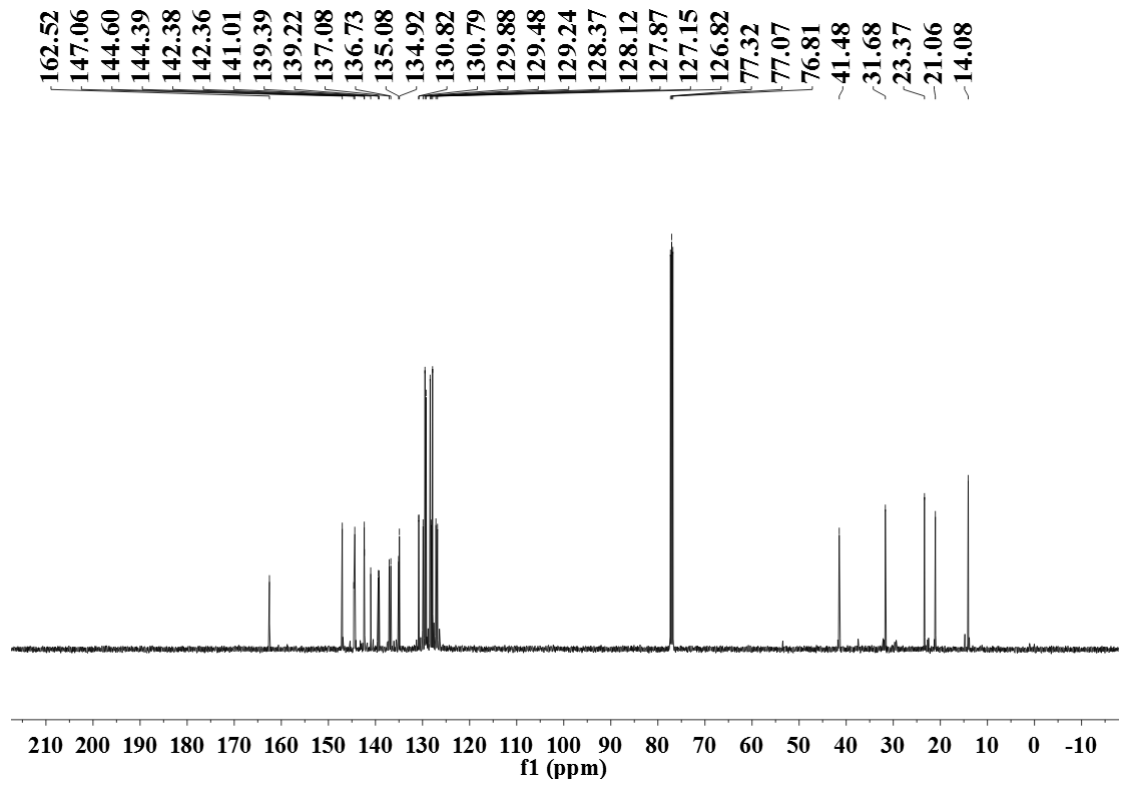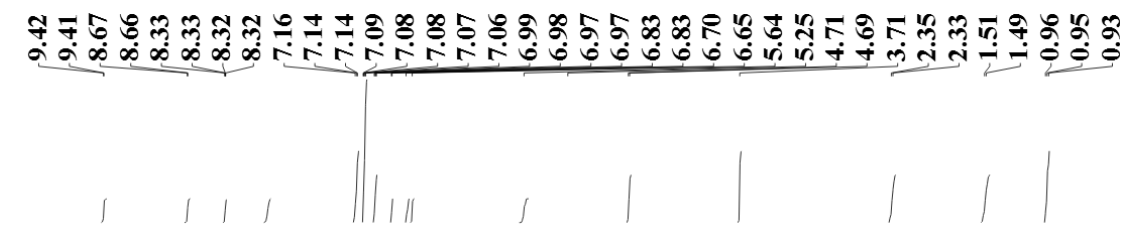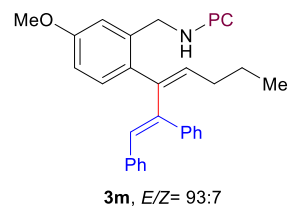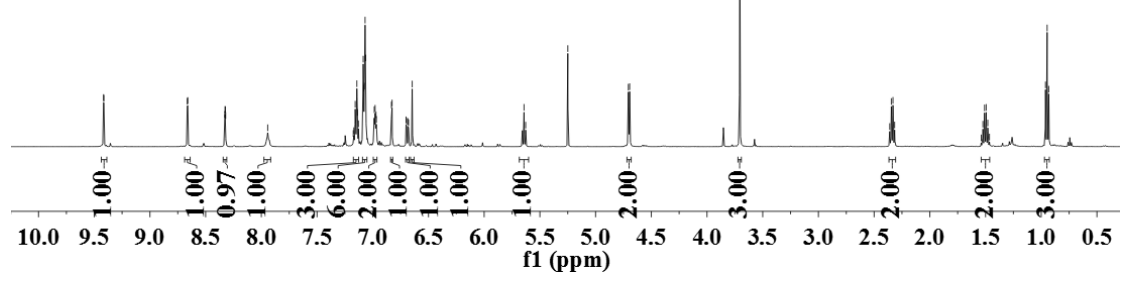

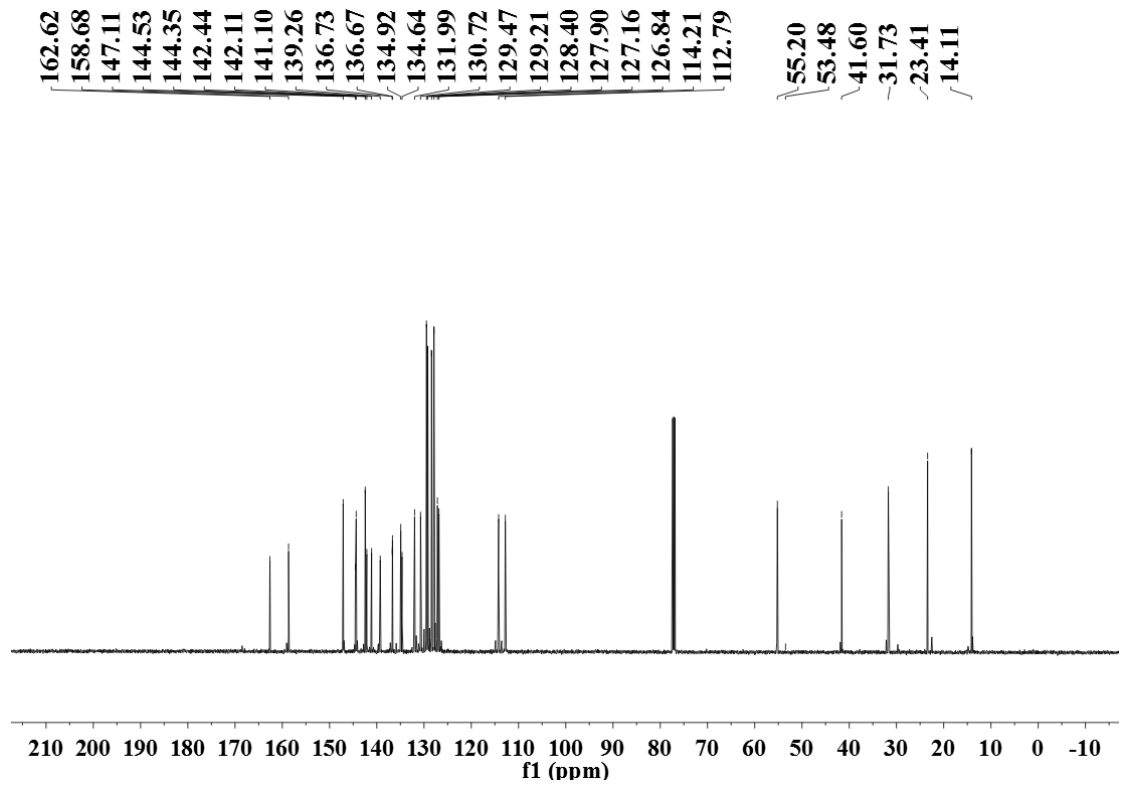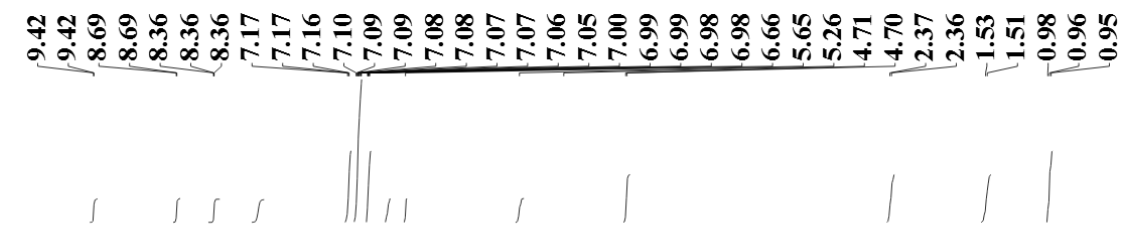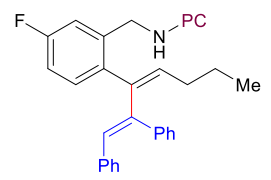

3n, E/Z= 97:3;

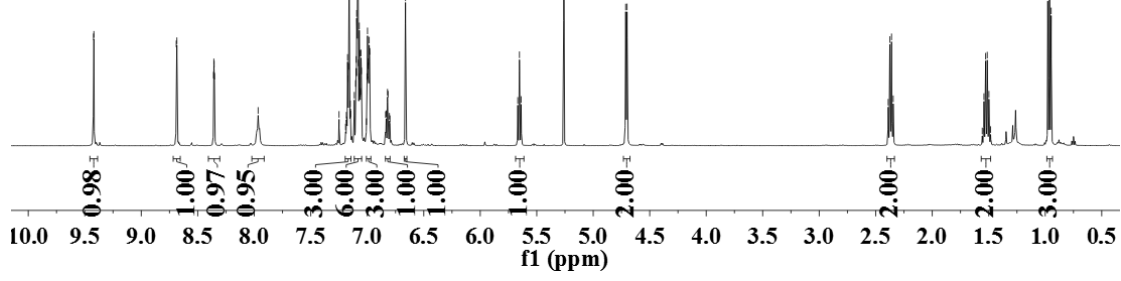

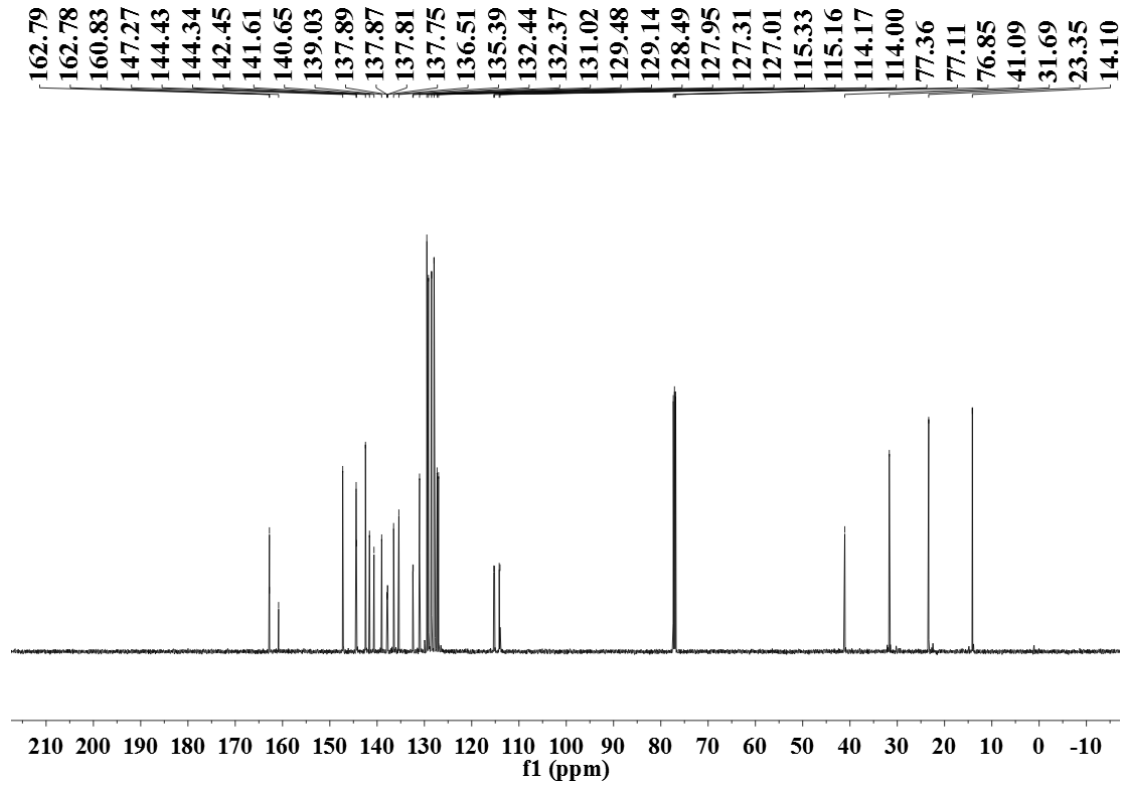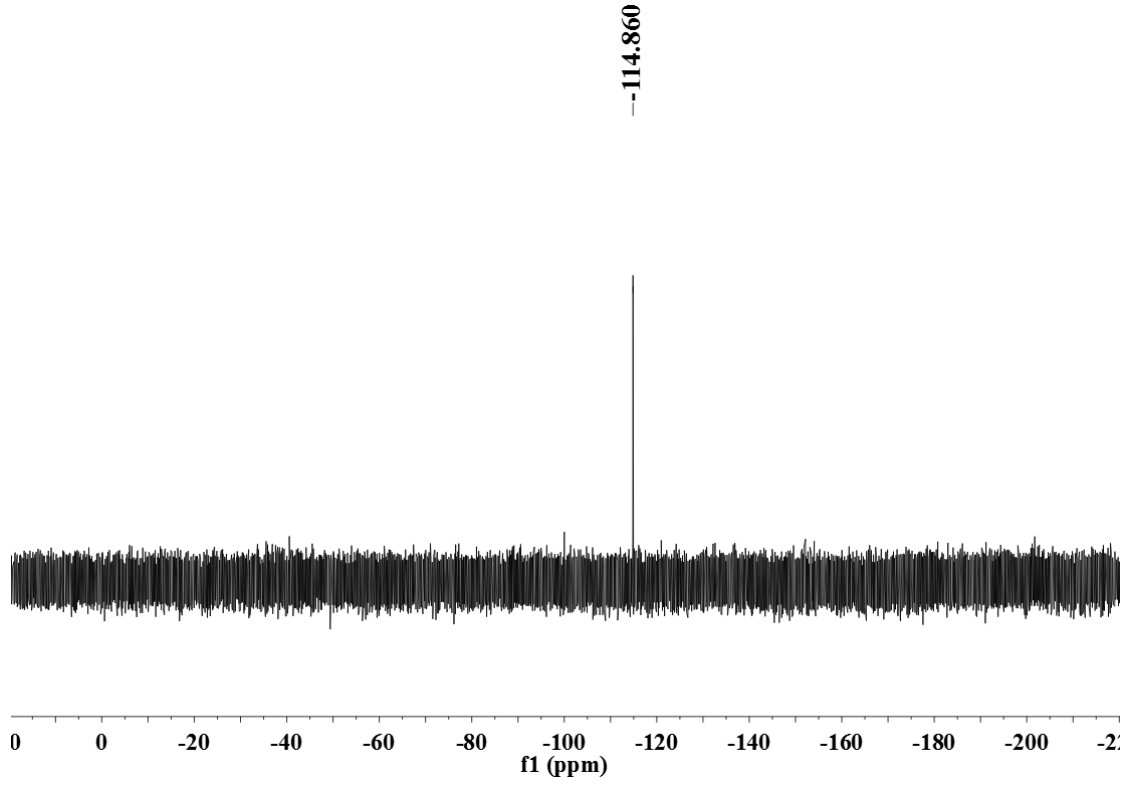

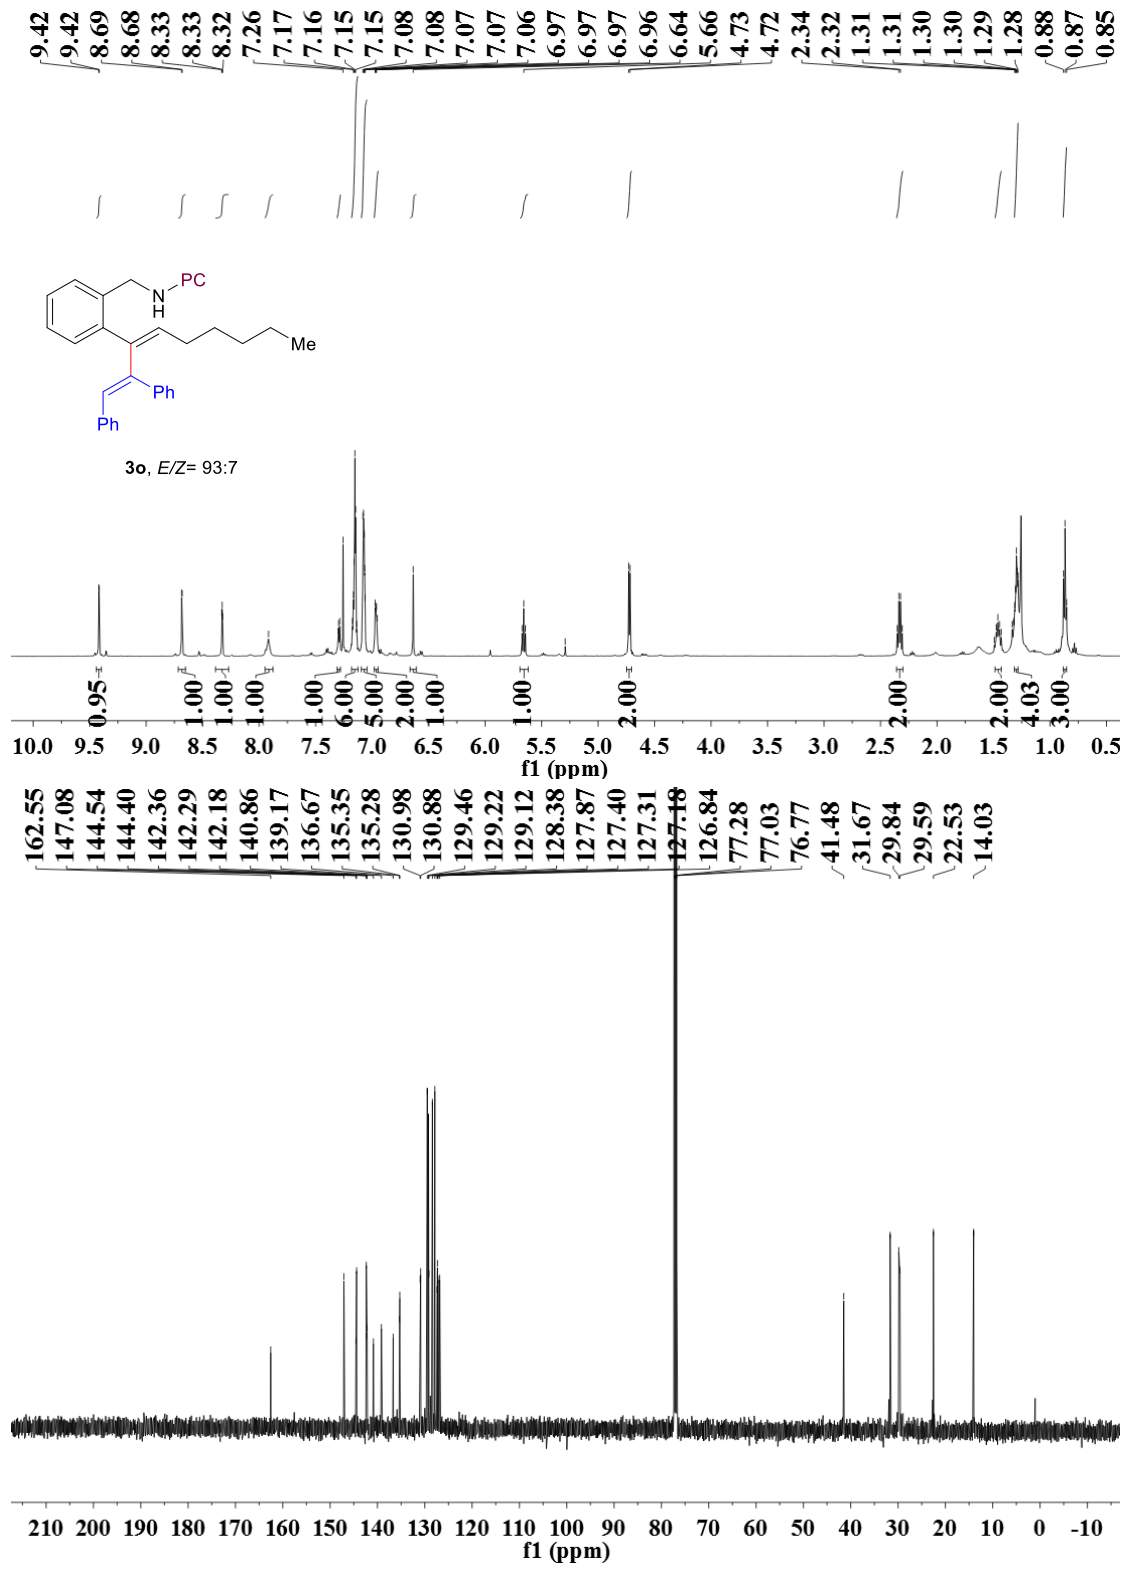

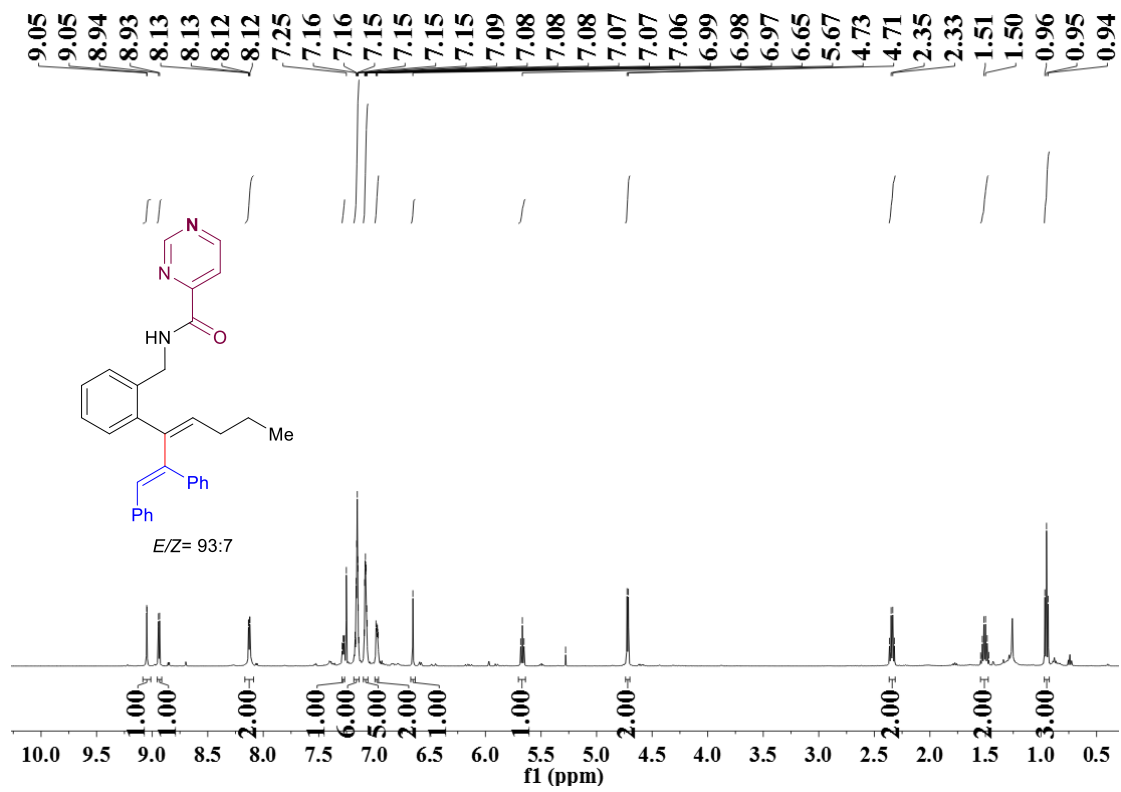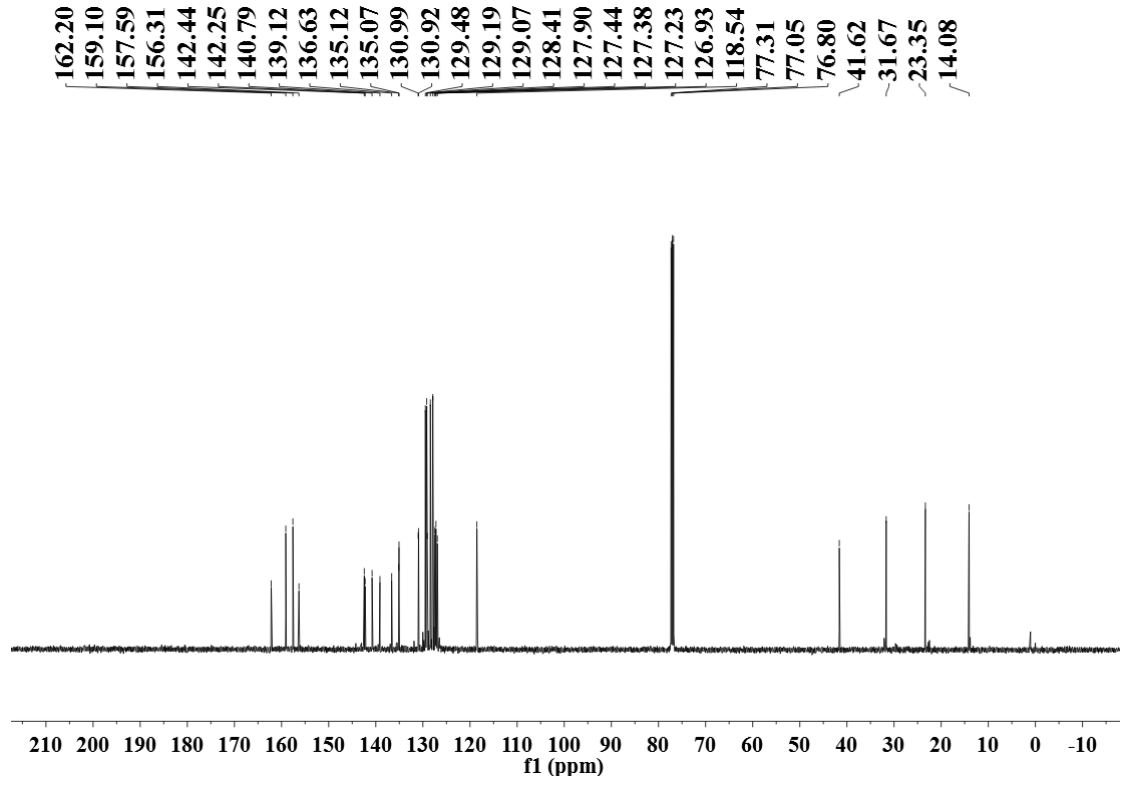

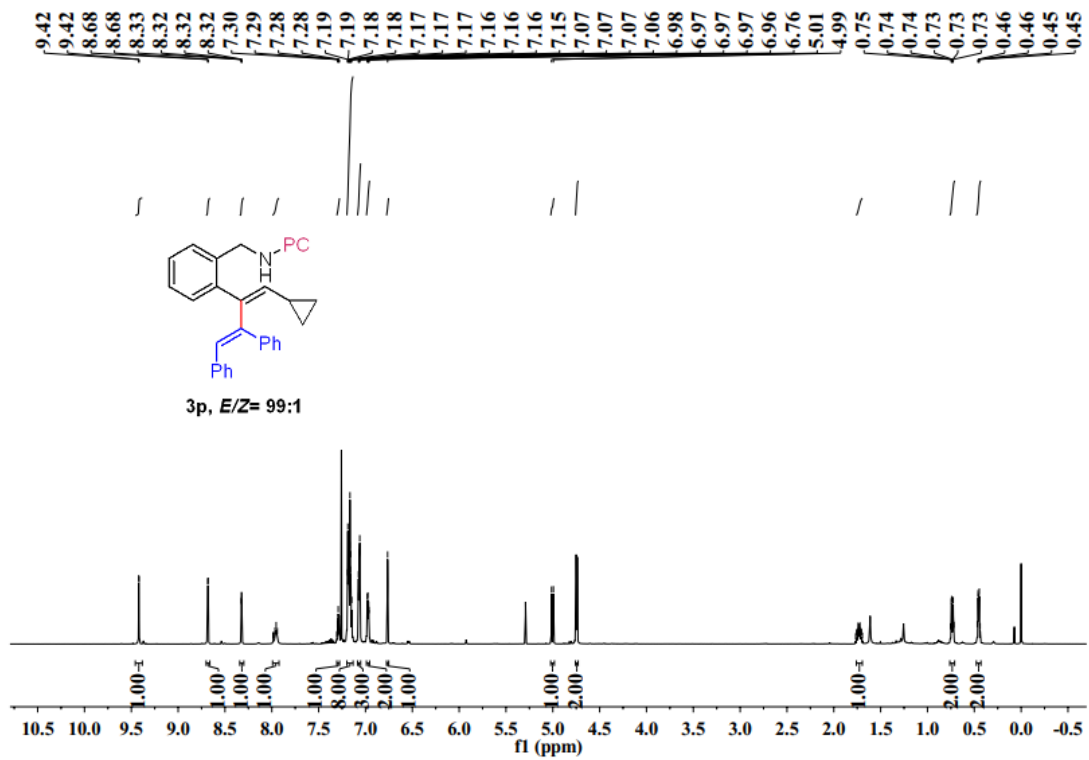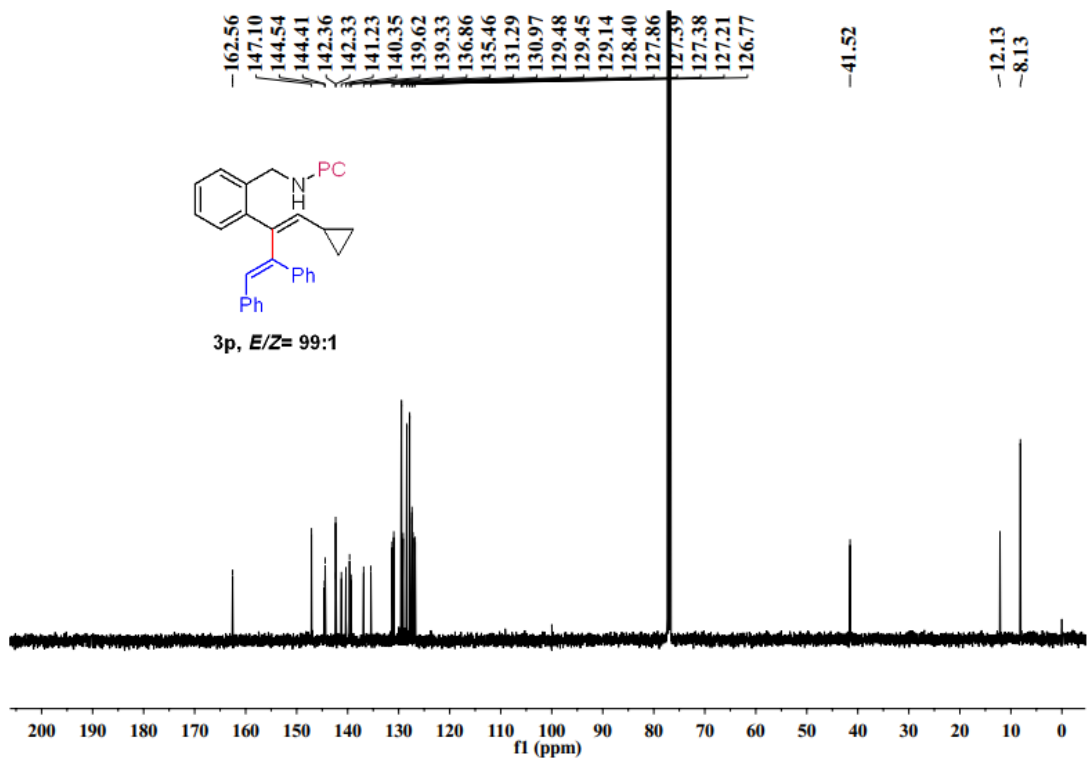

## 8.2 NMR Spectra of the Products 5

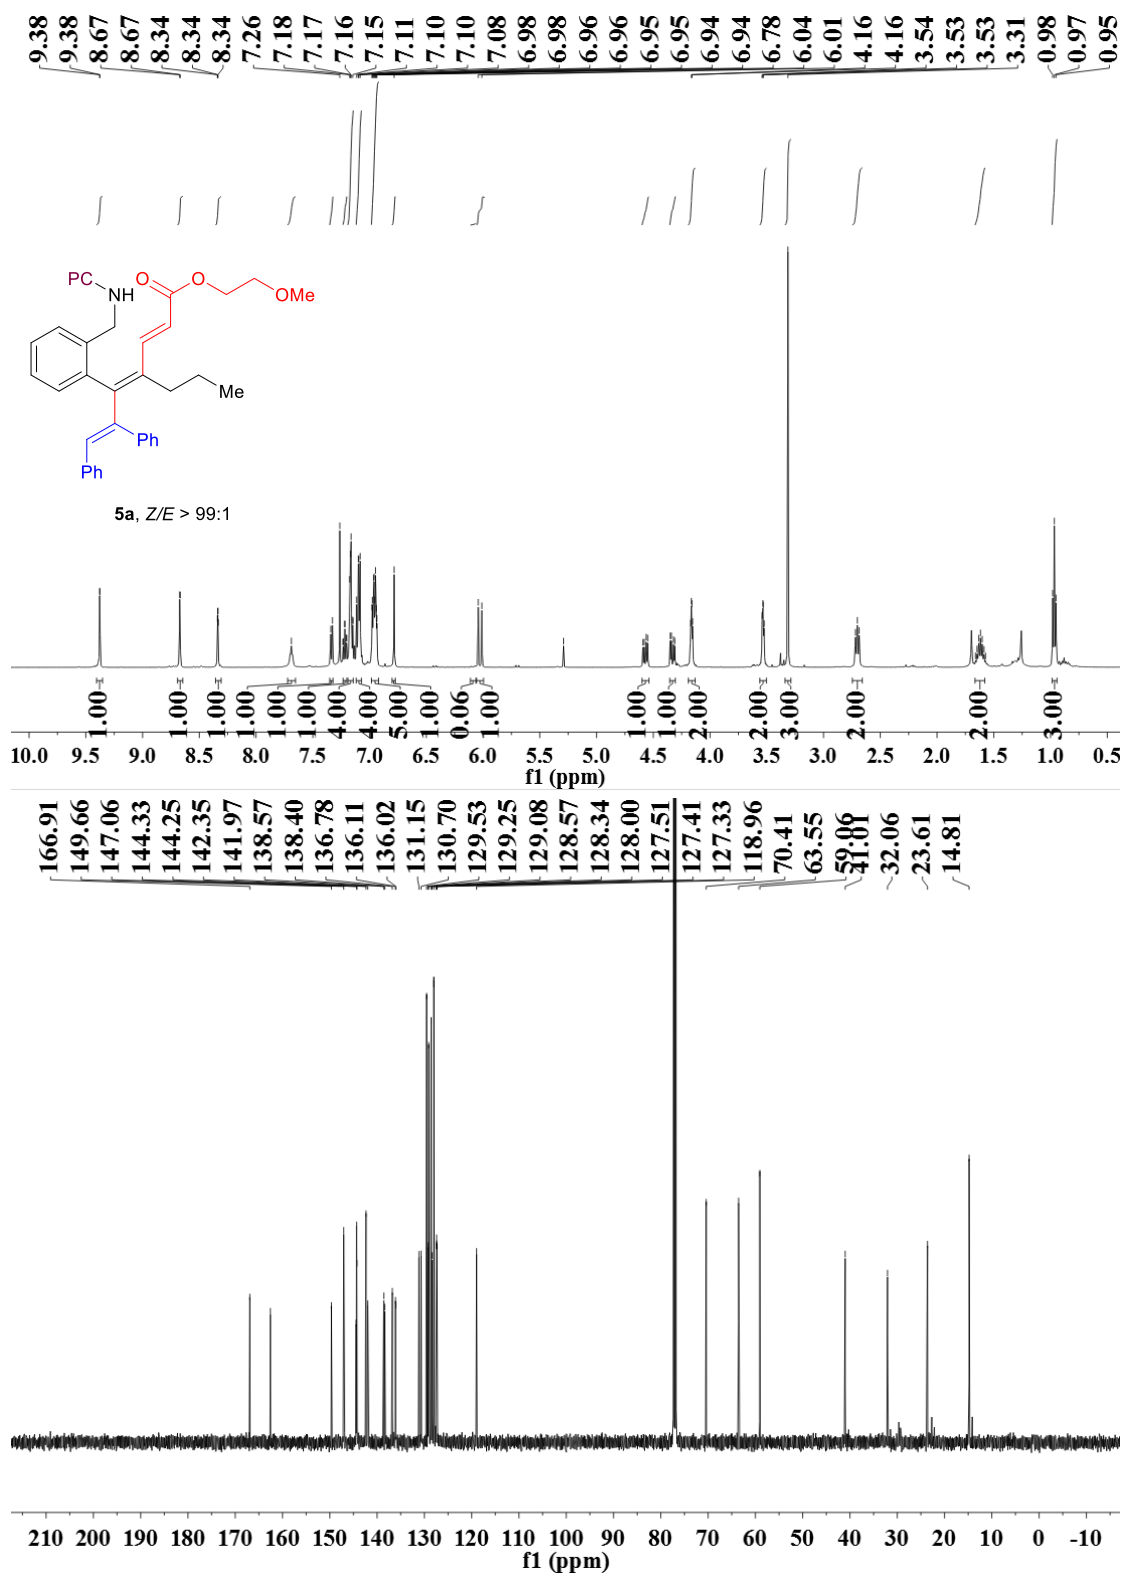



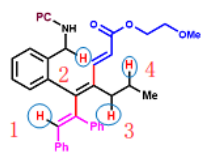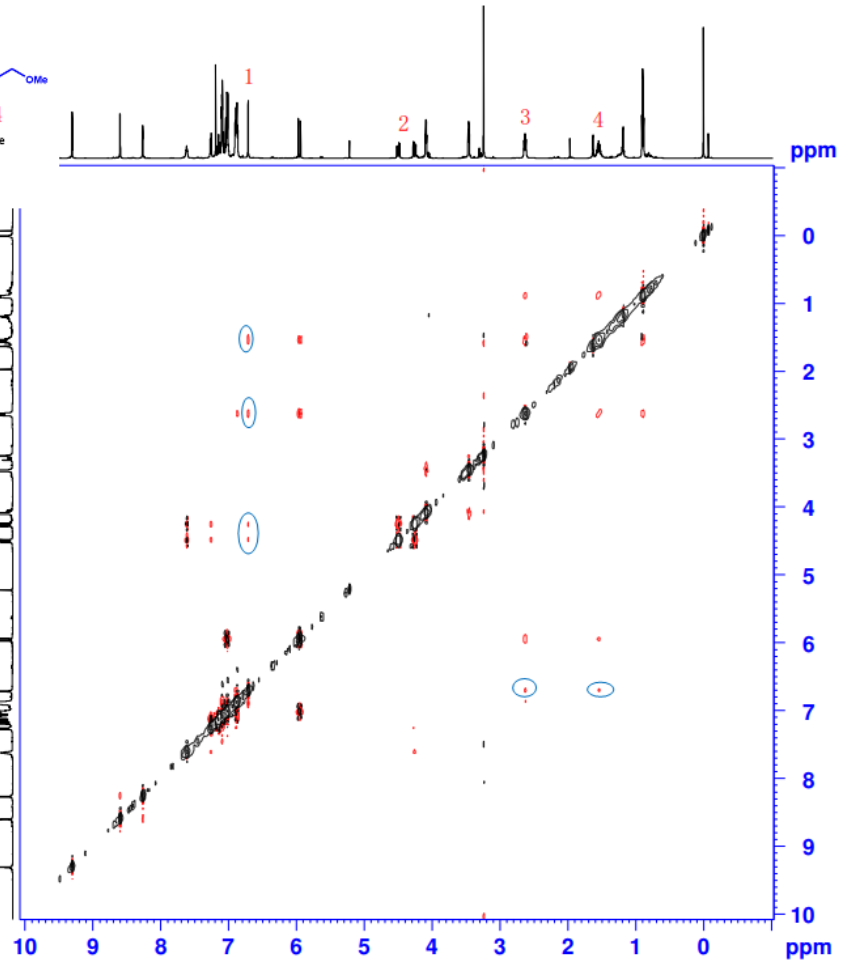

9.34  
8.60  
8.22  
7.70  
7.36  
7.35  
7.30  
7.29  
7.24  
7.23  
7.20  
7.18  
7.17  
7.17  
7.15  
7.13  
7.10  
7.08  
6.98  
6.97  
6.96  
6.95  
6.79  
6.01  
5.98  
5.28  
5.04  
4.55  
4.37  
4.36  
2.71  
2.70  
2.68  
0.97  
0.96  
0.95

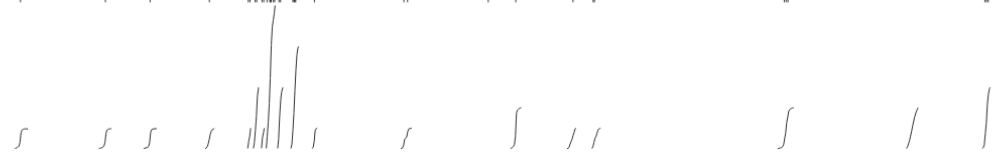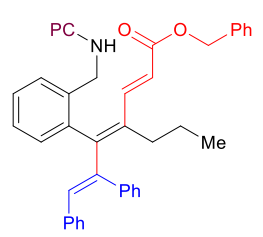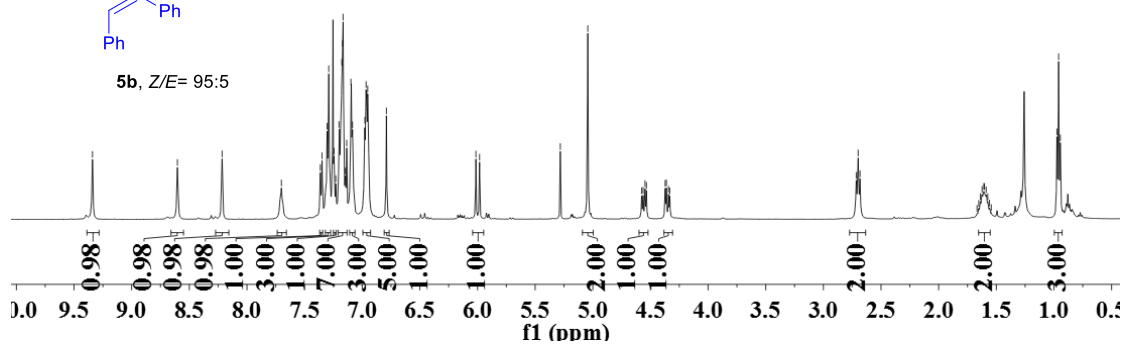

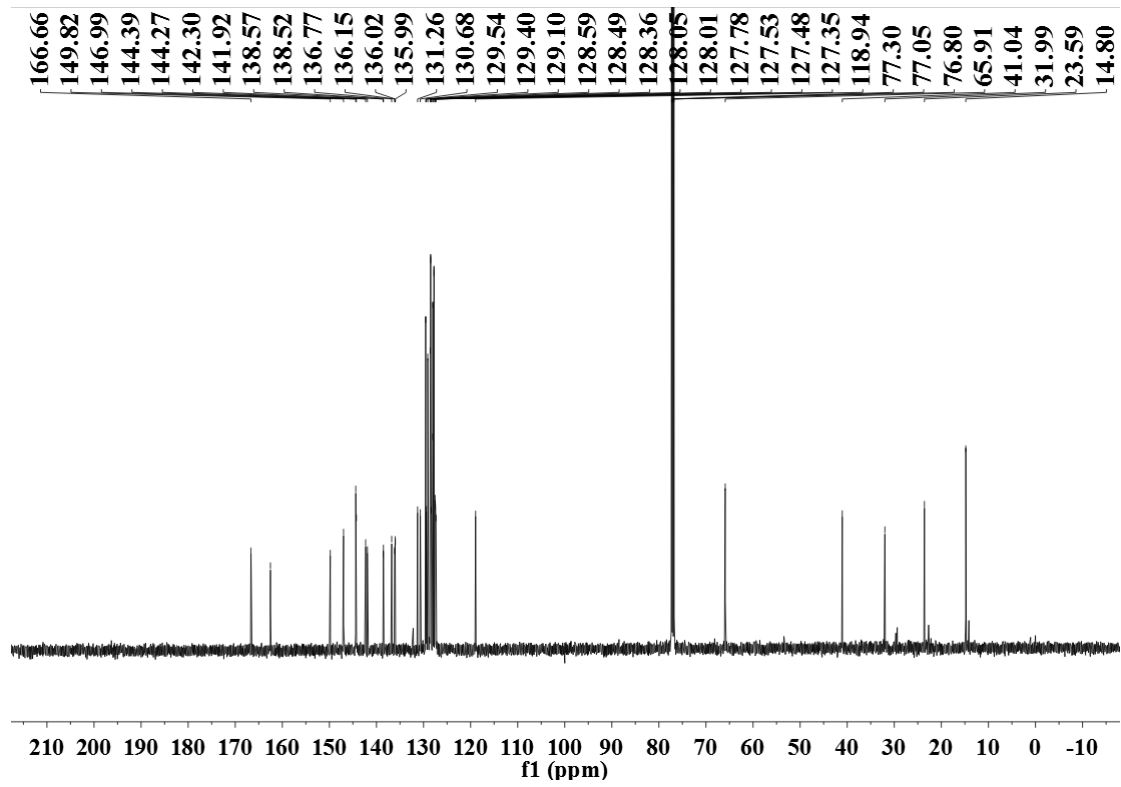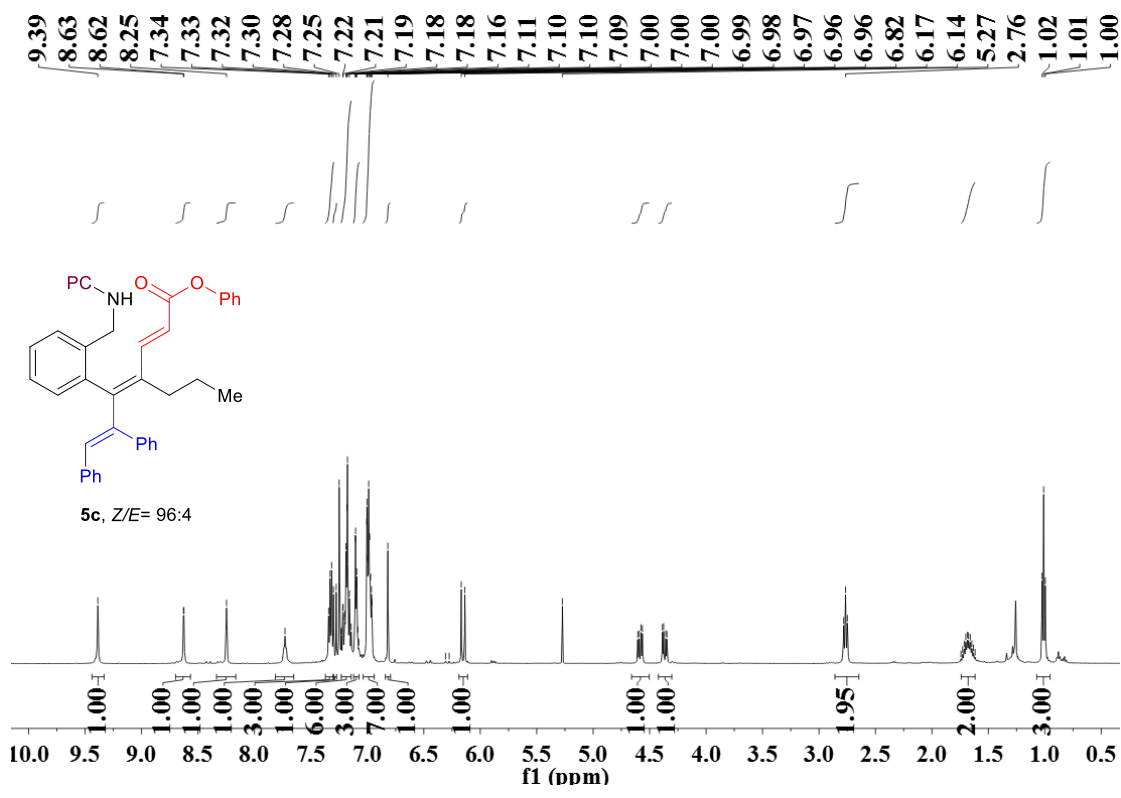

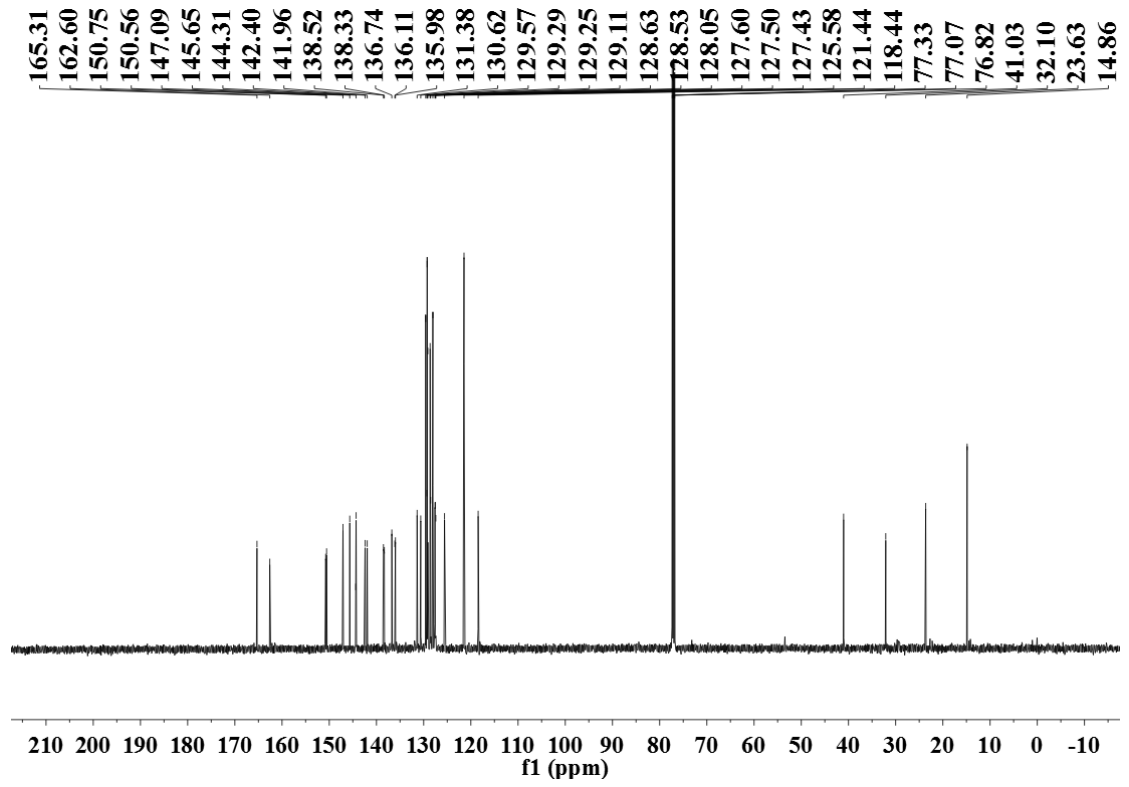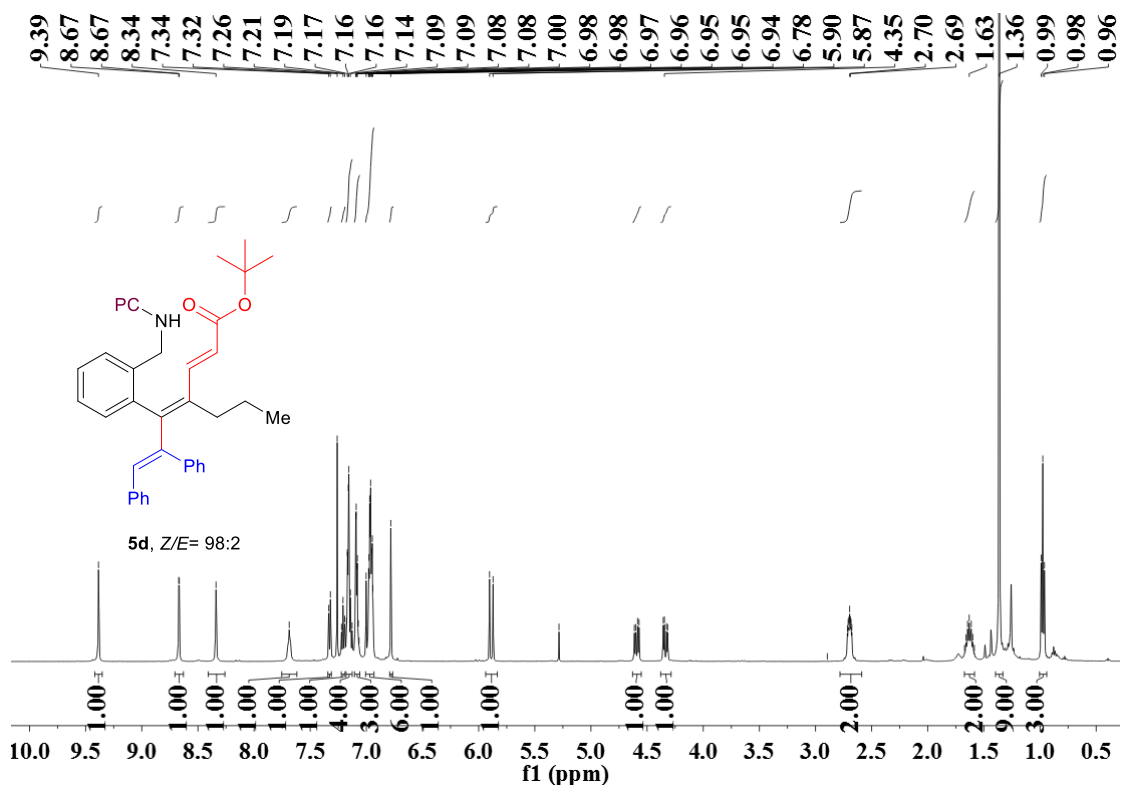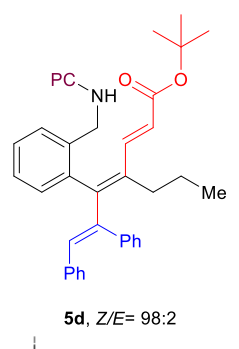

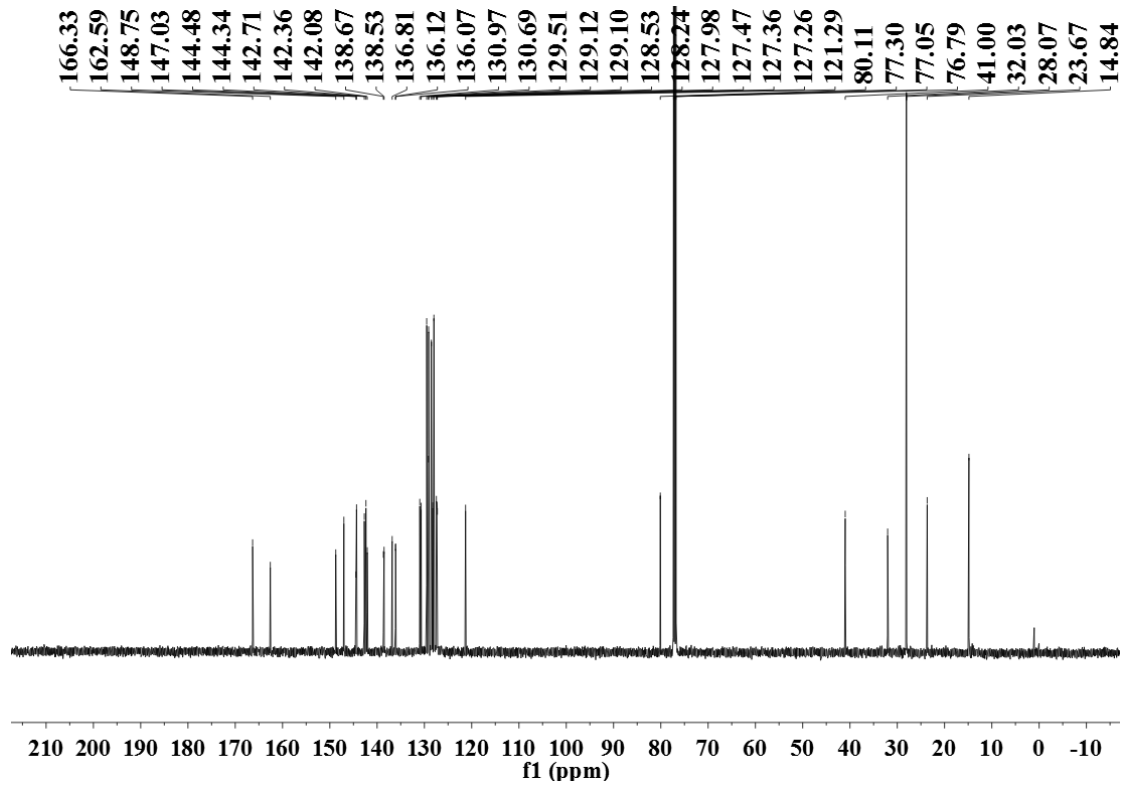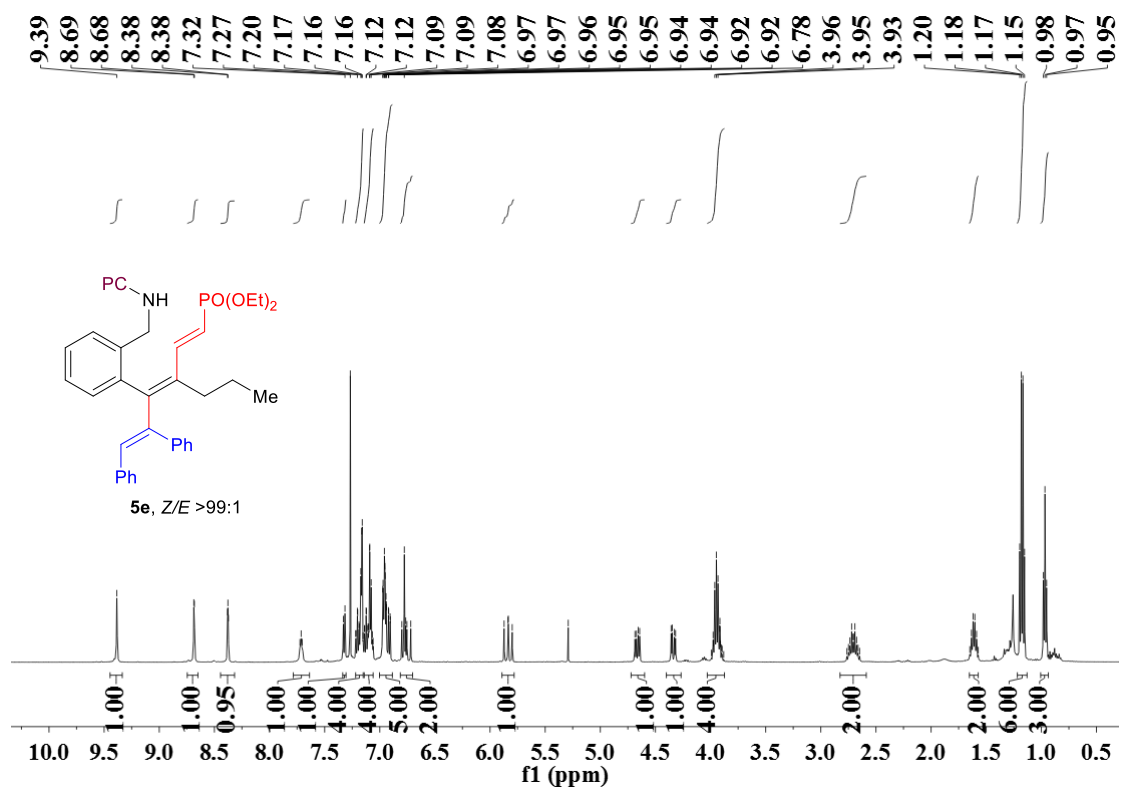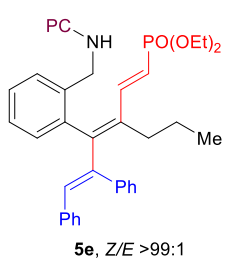

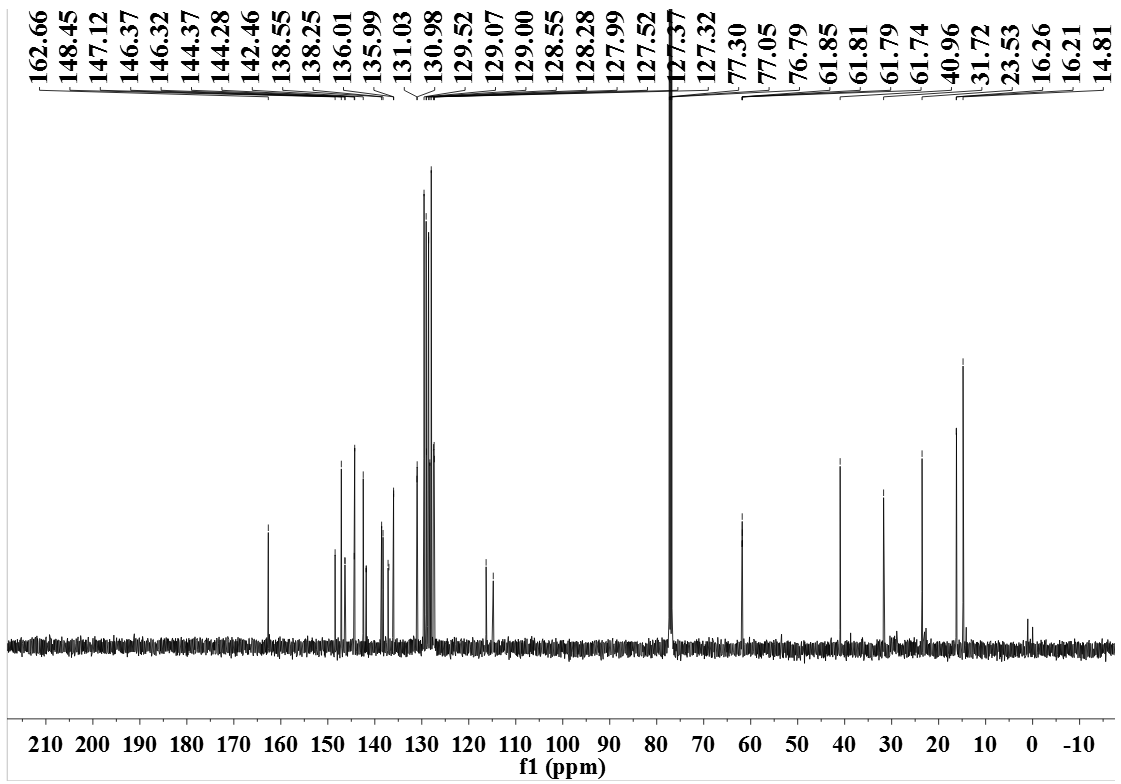

-19.44

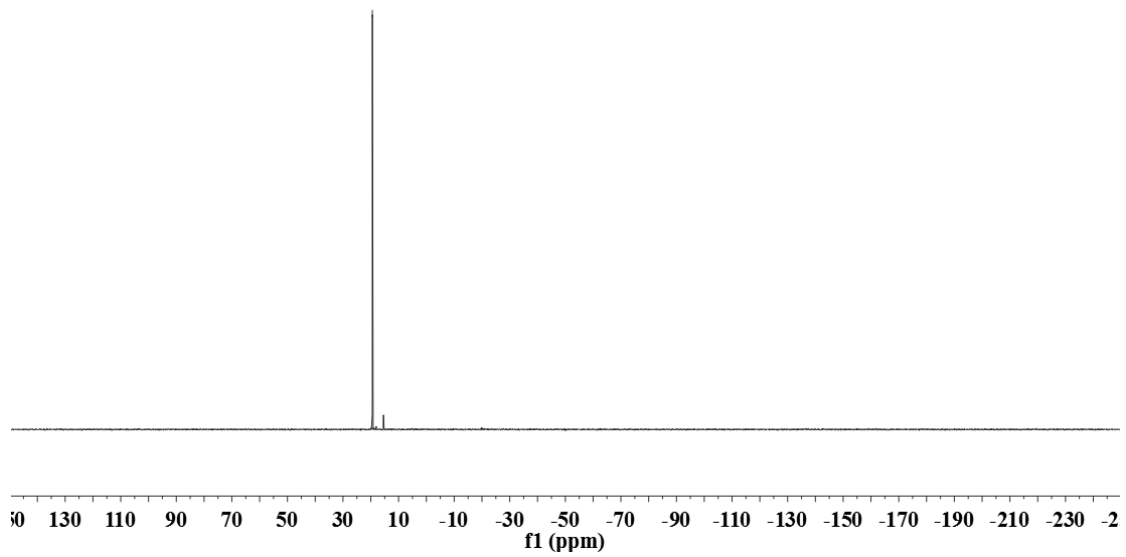

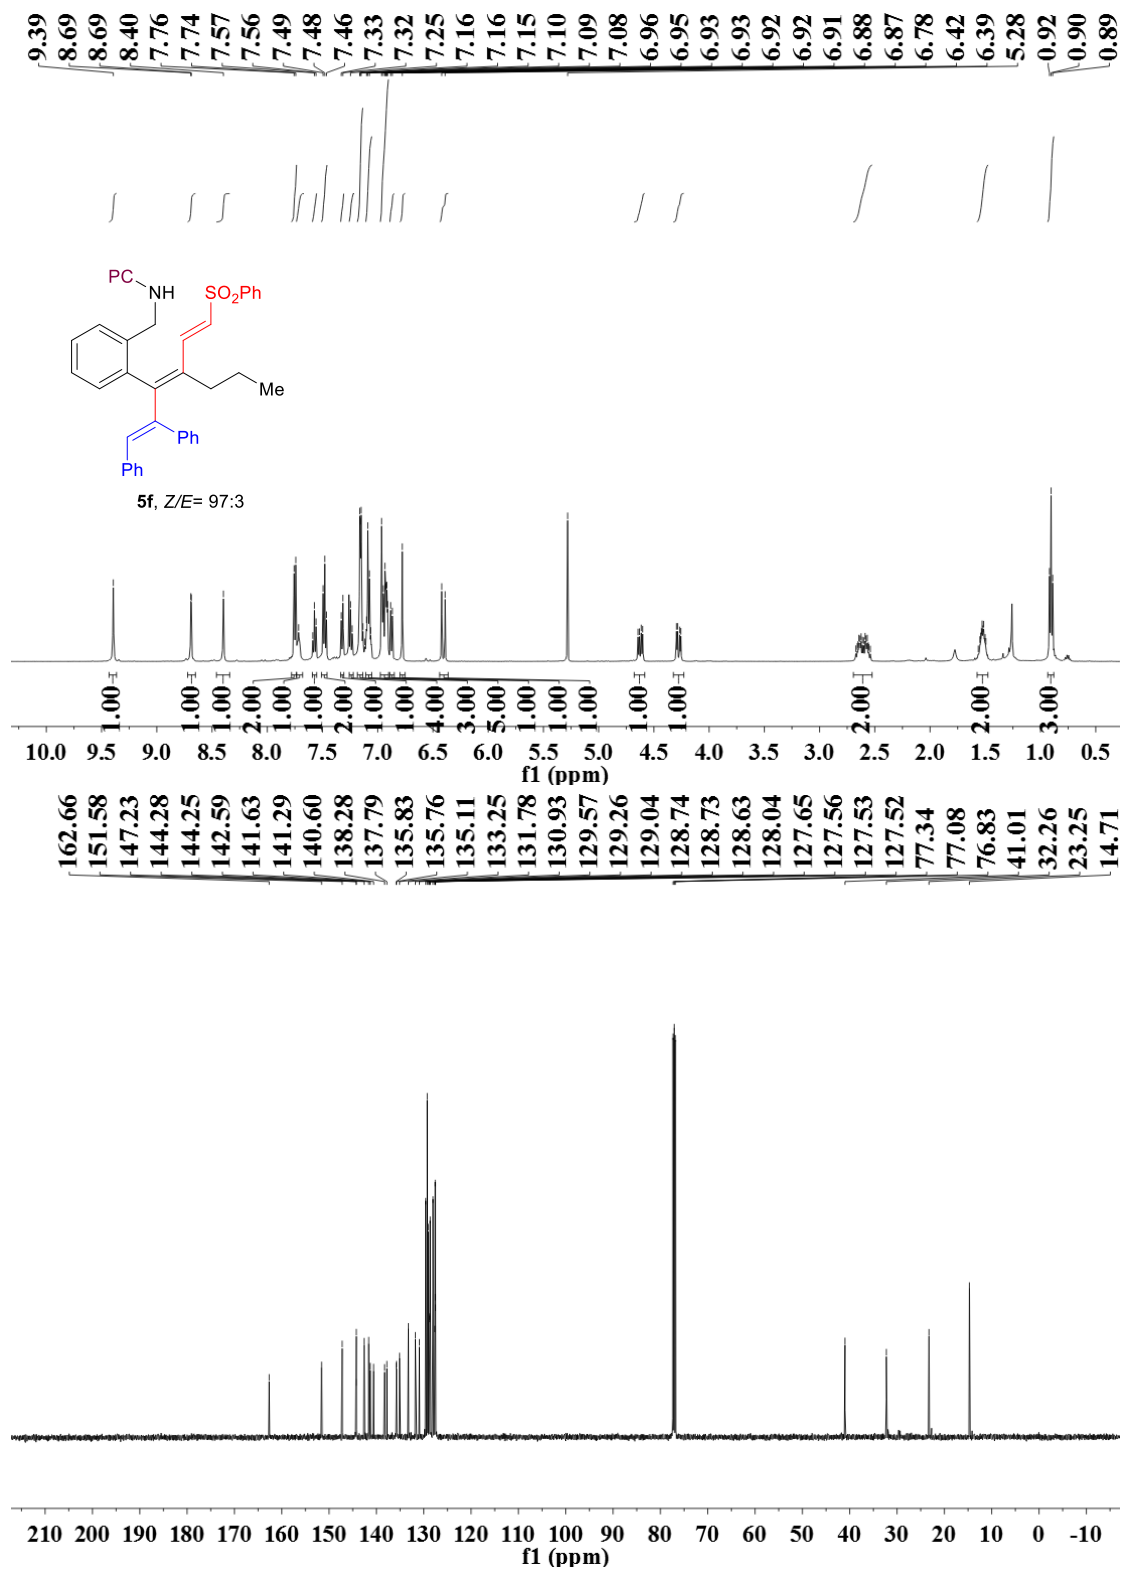

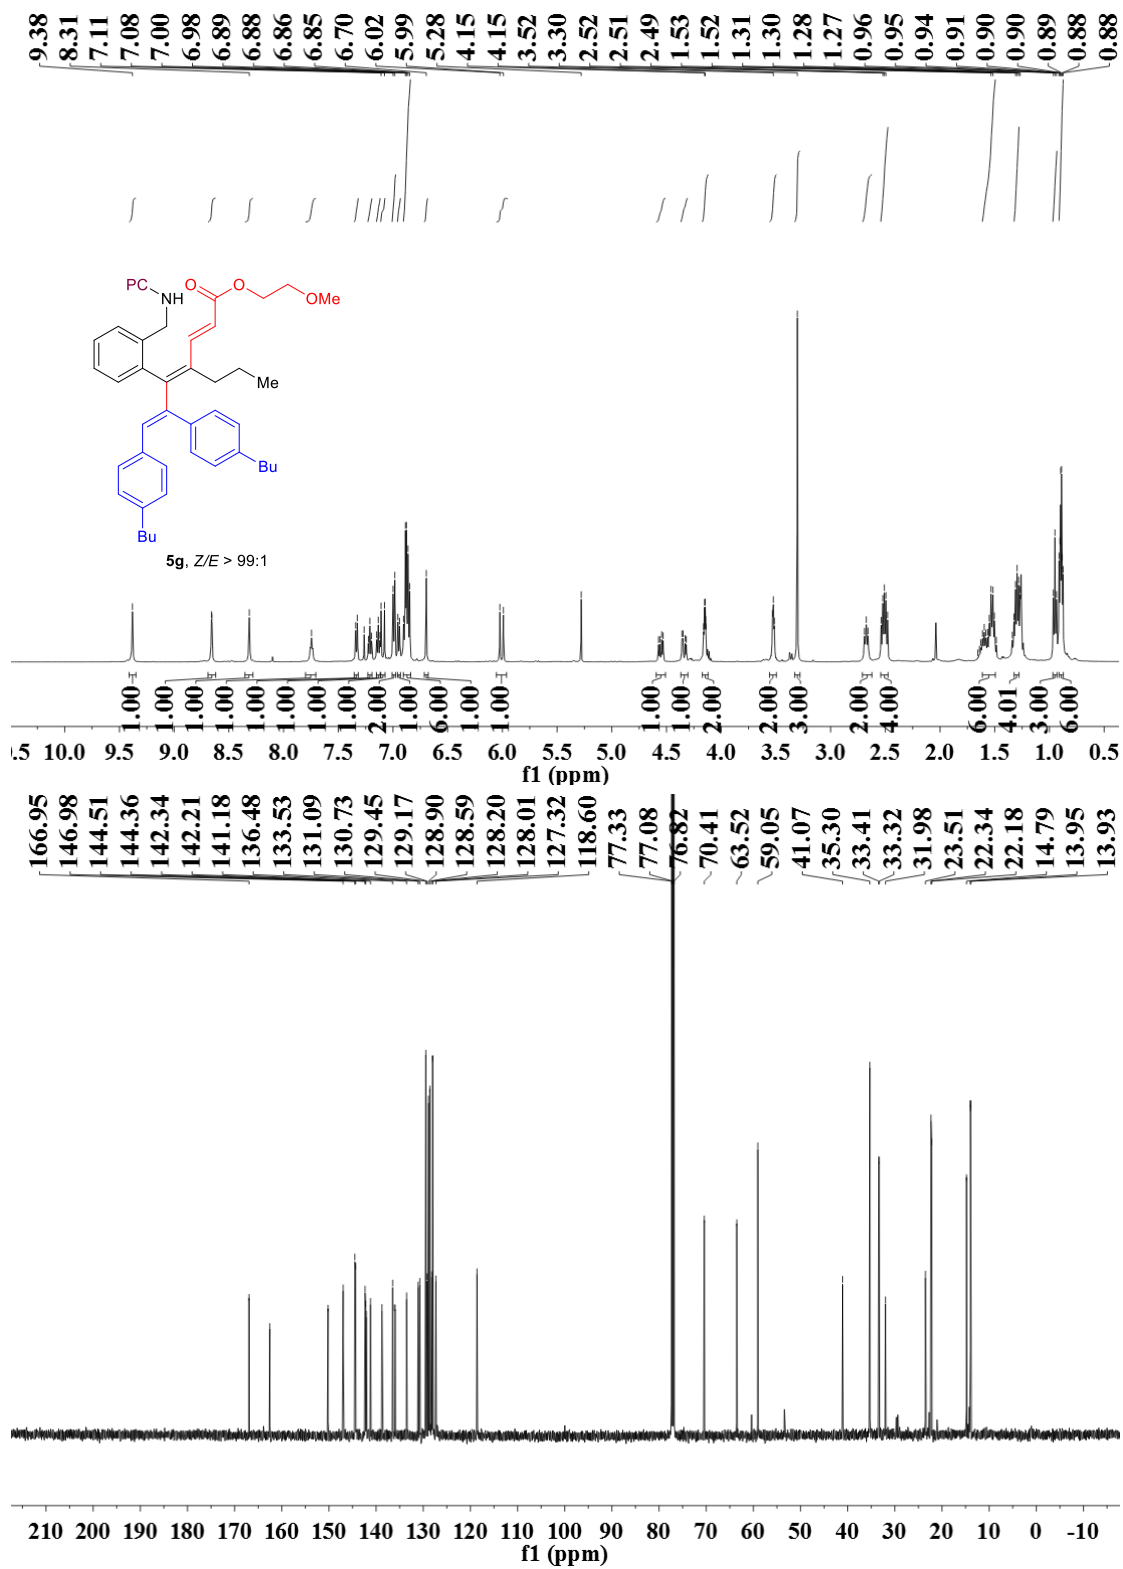

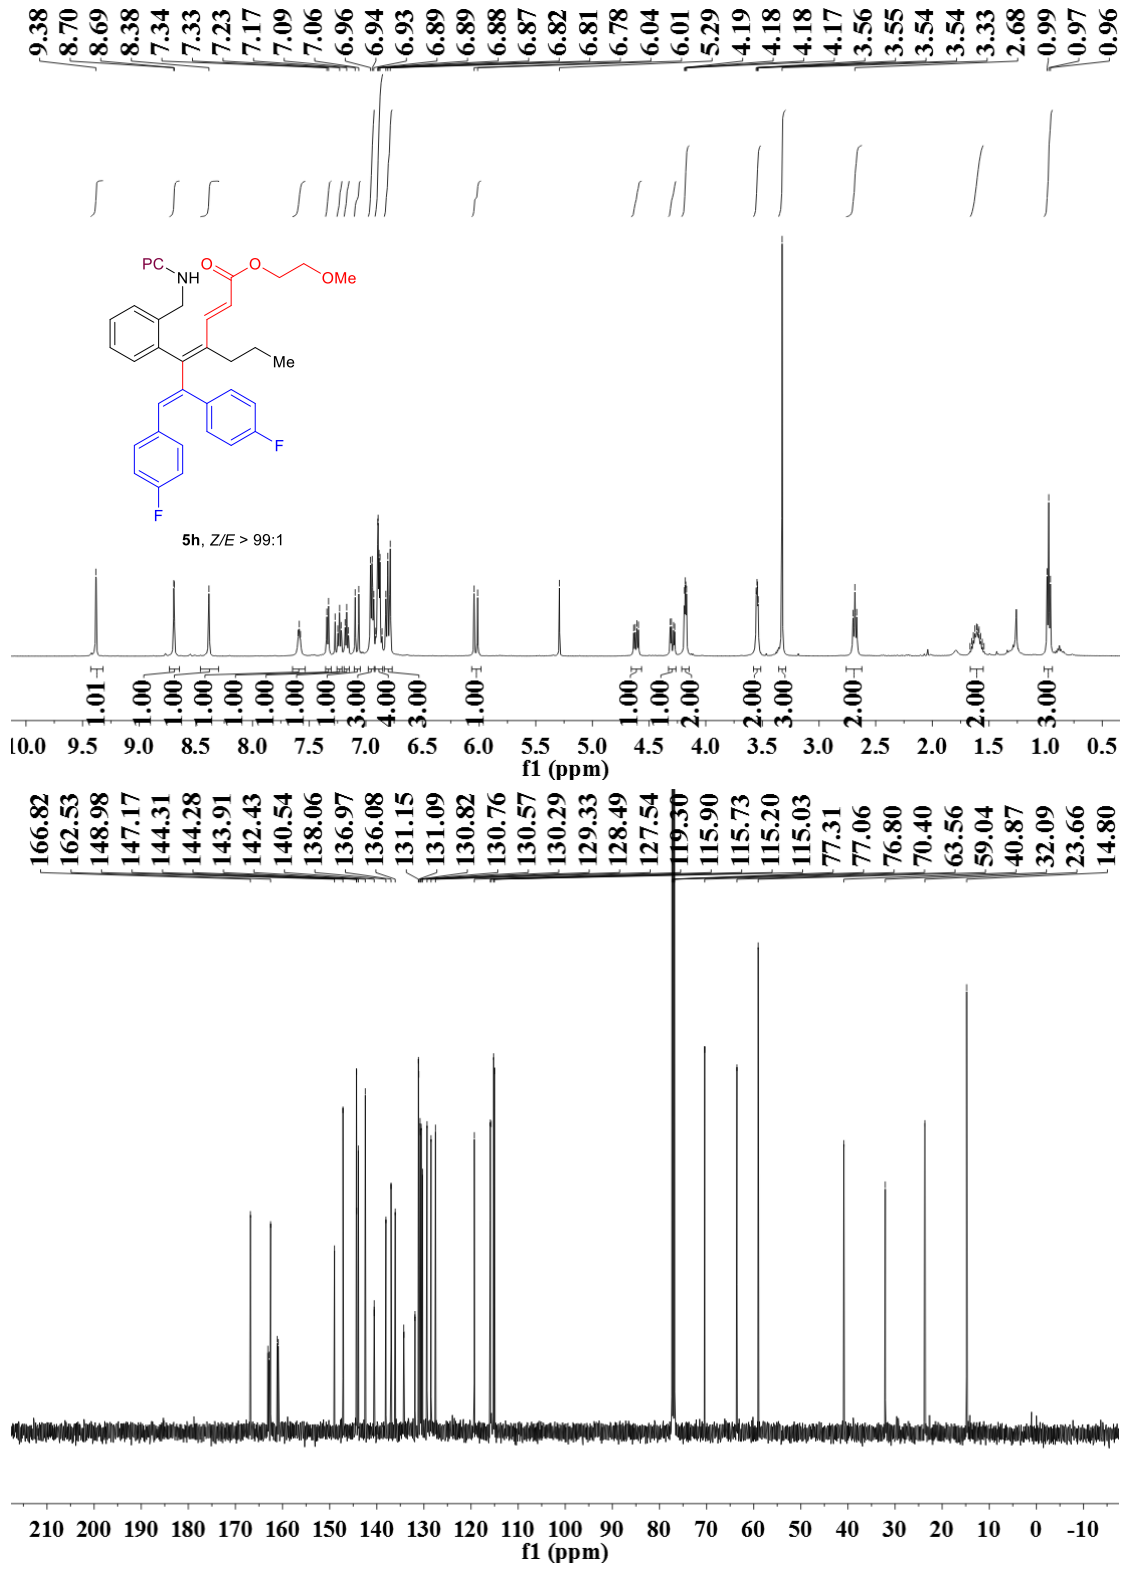



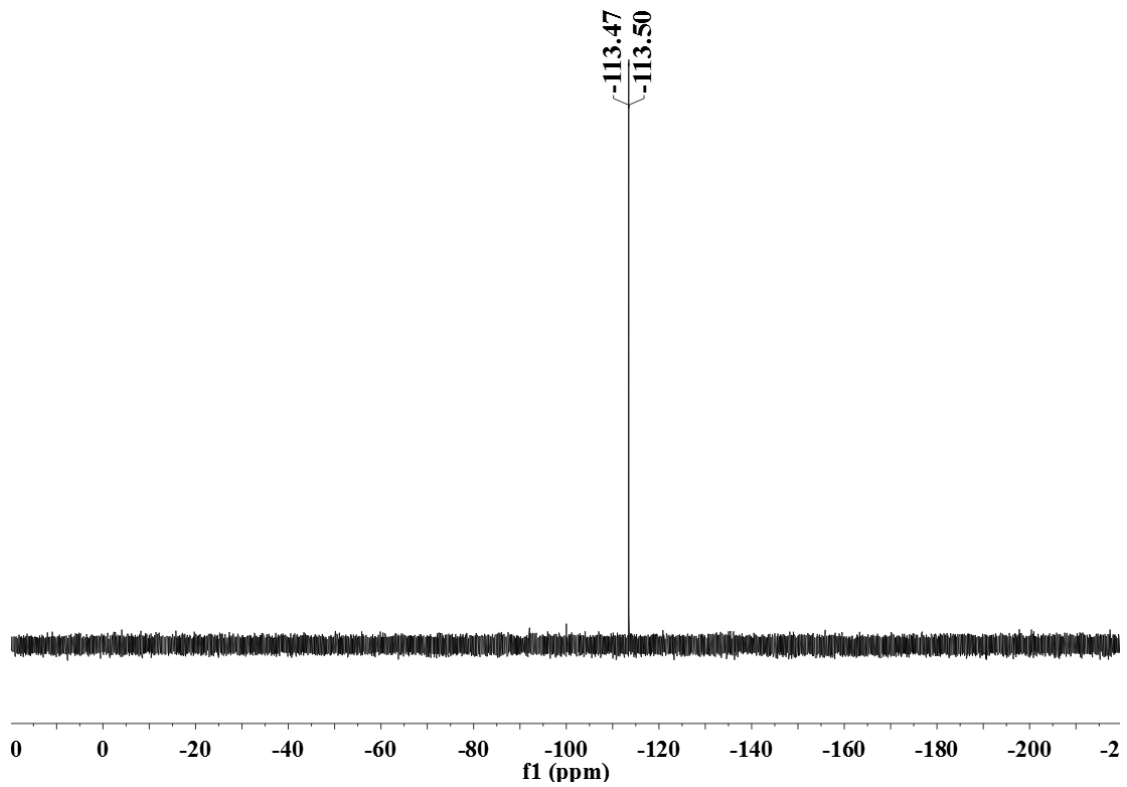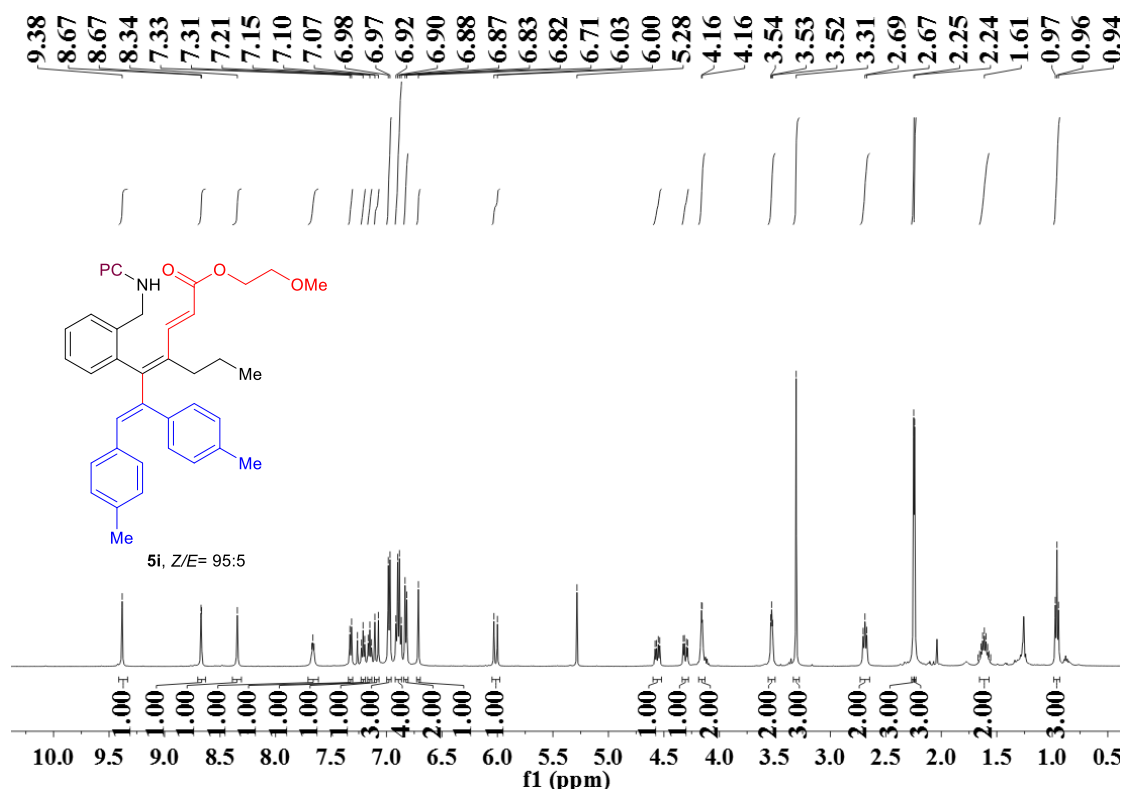

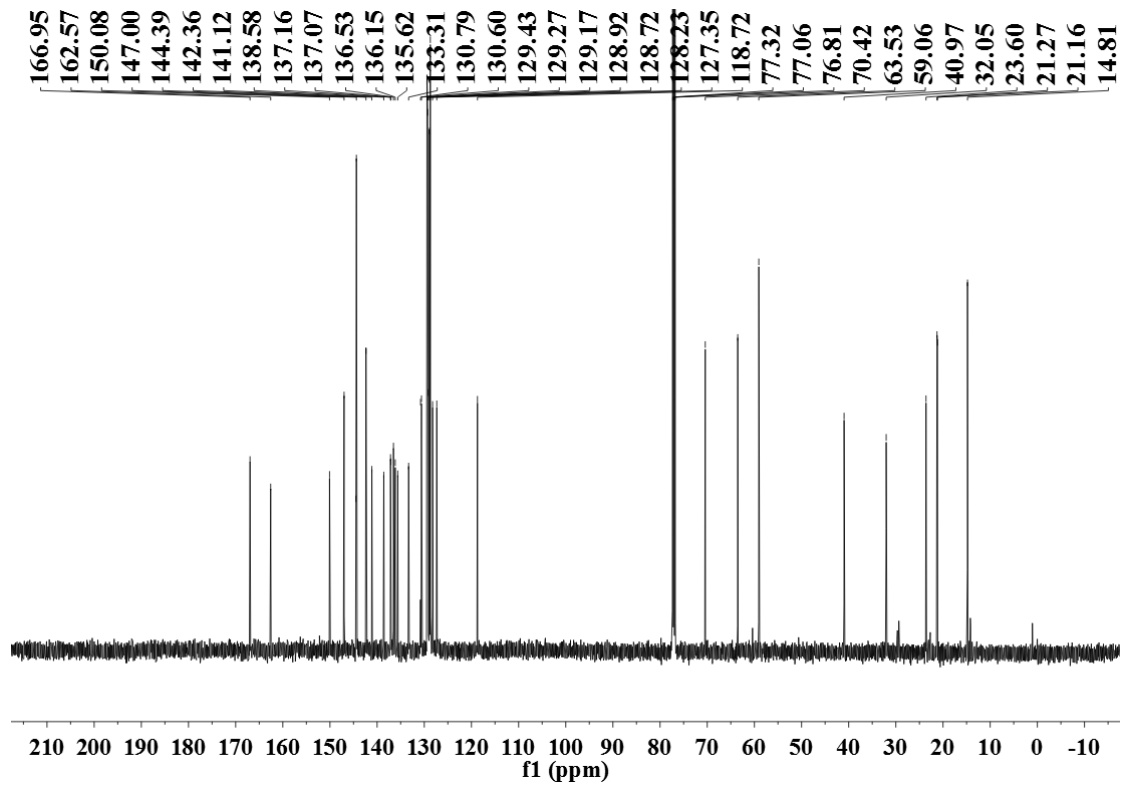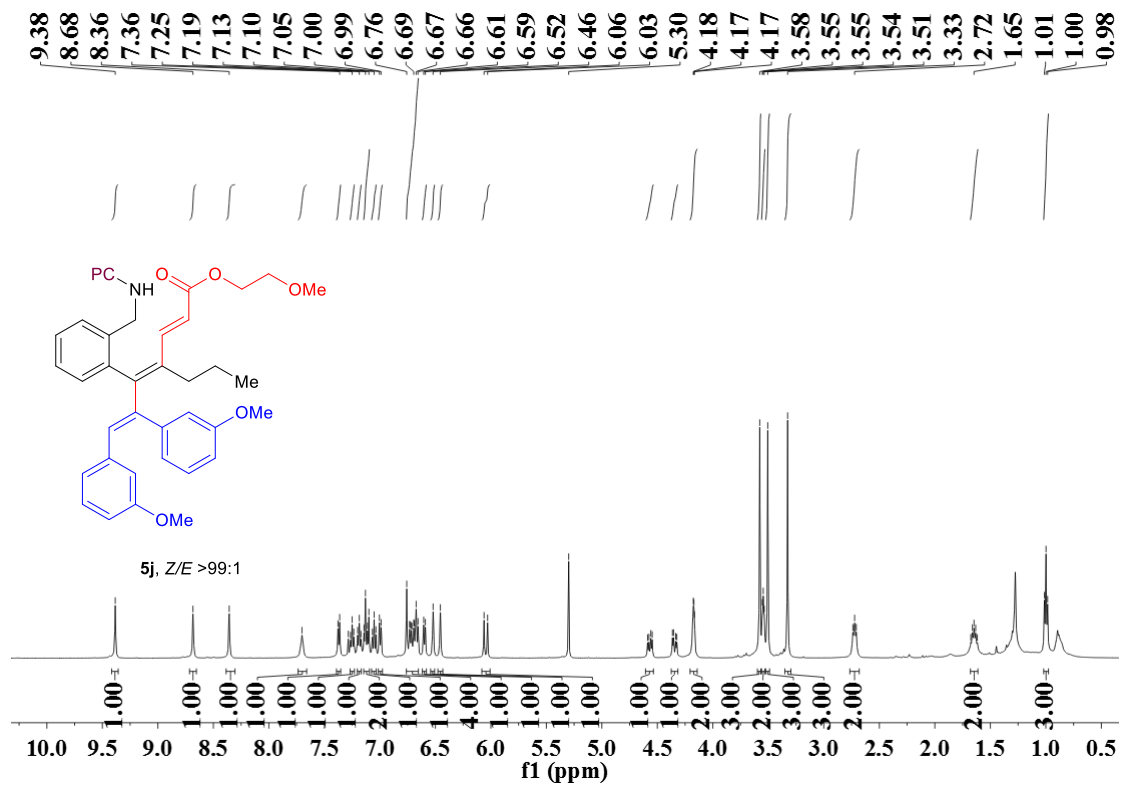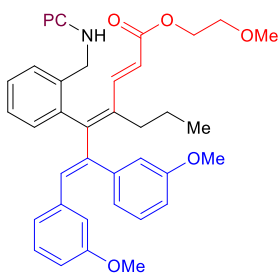

5j, Z/E >99:1

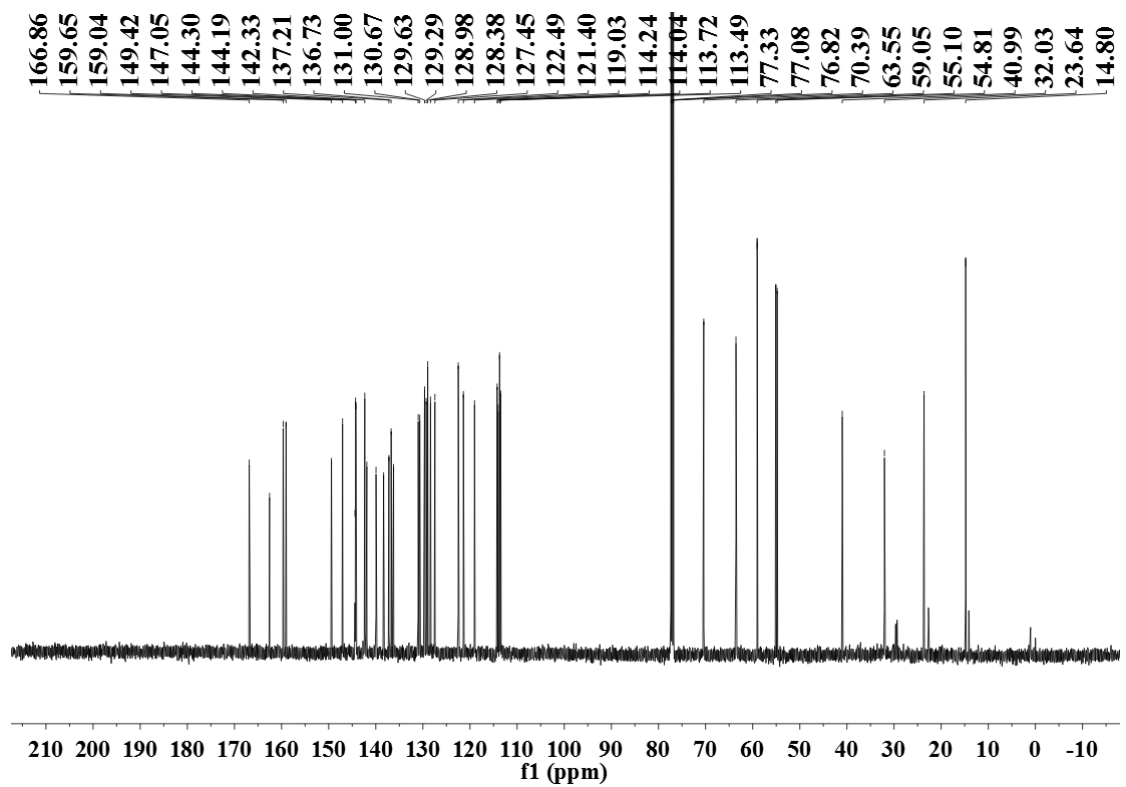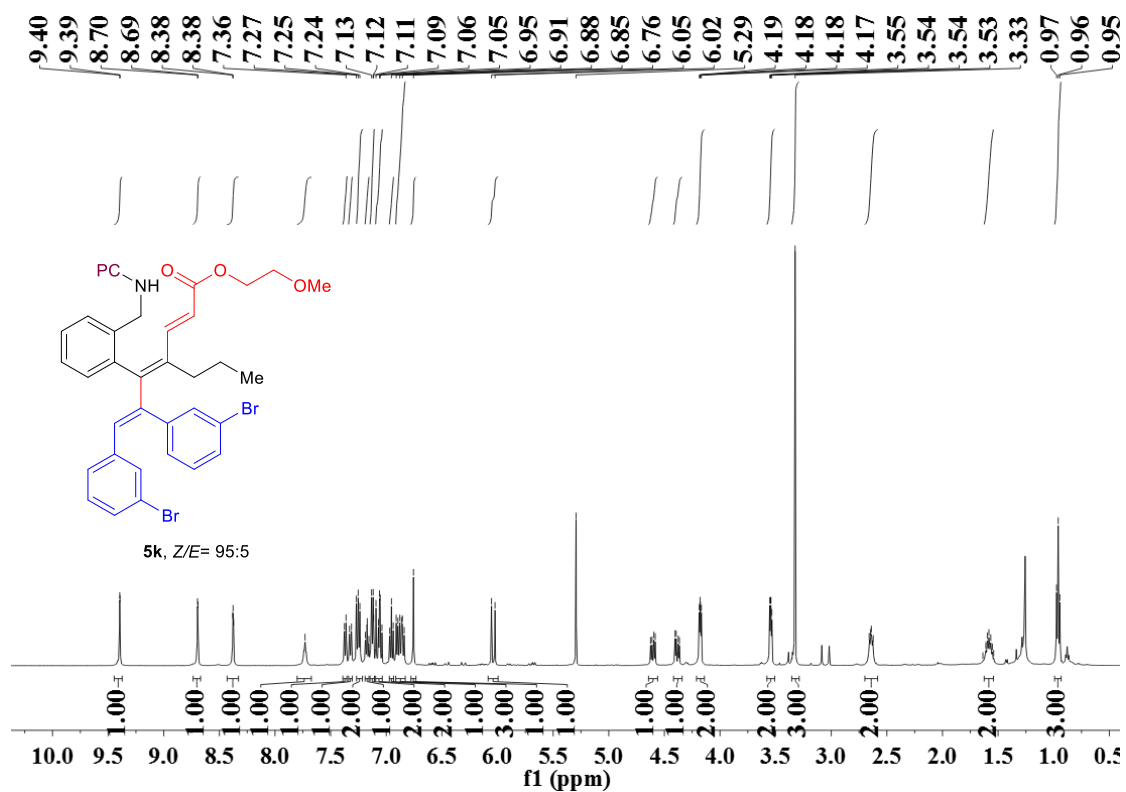

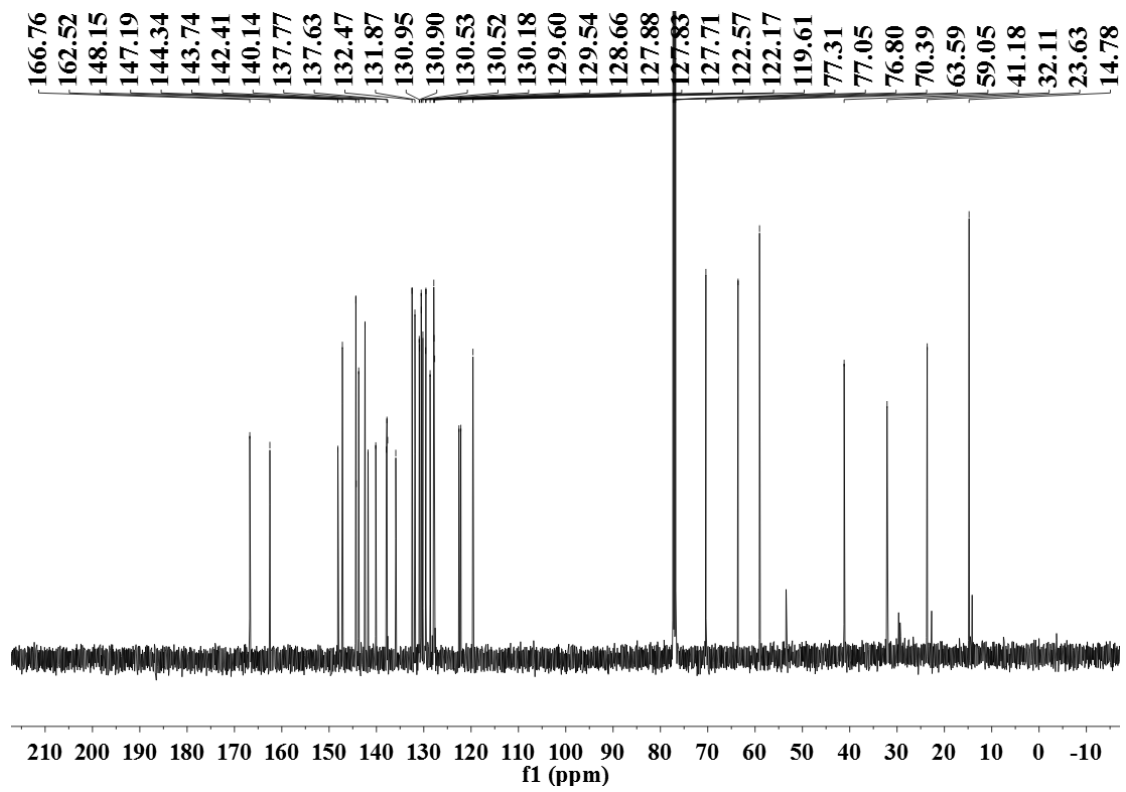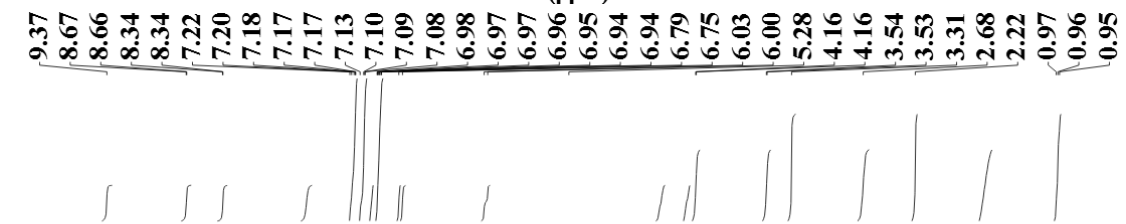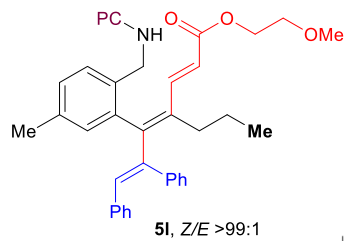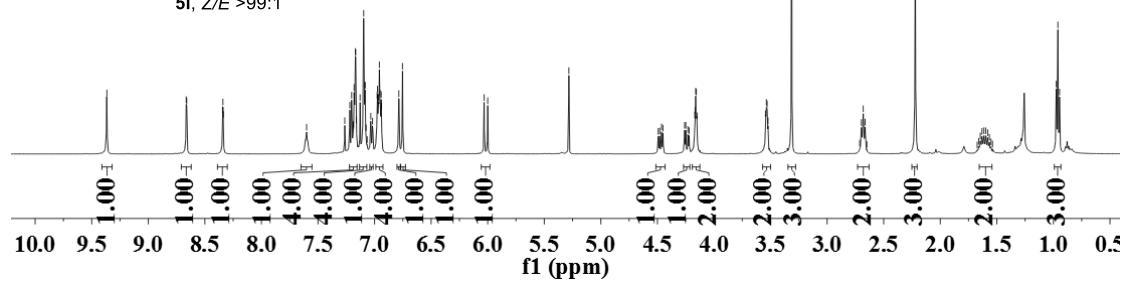

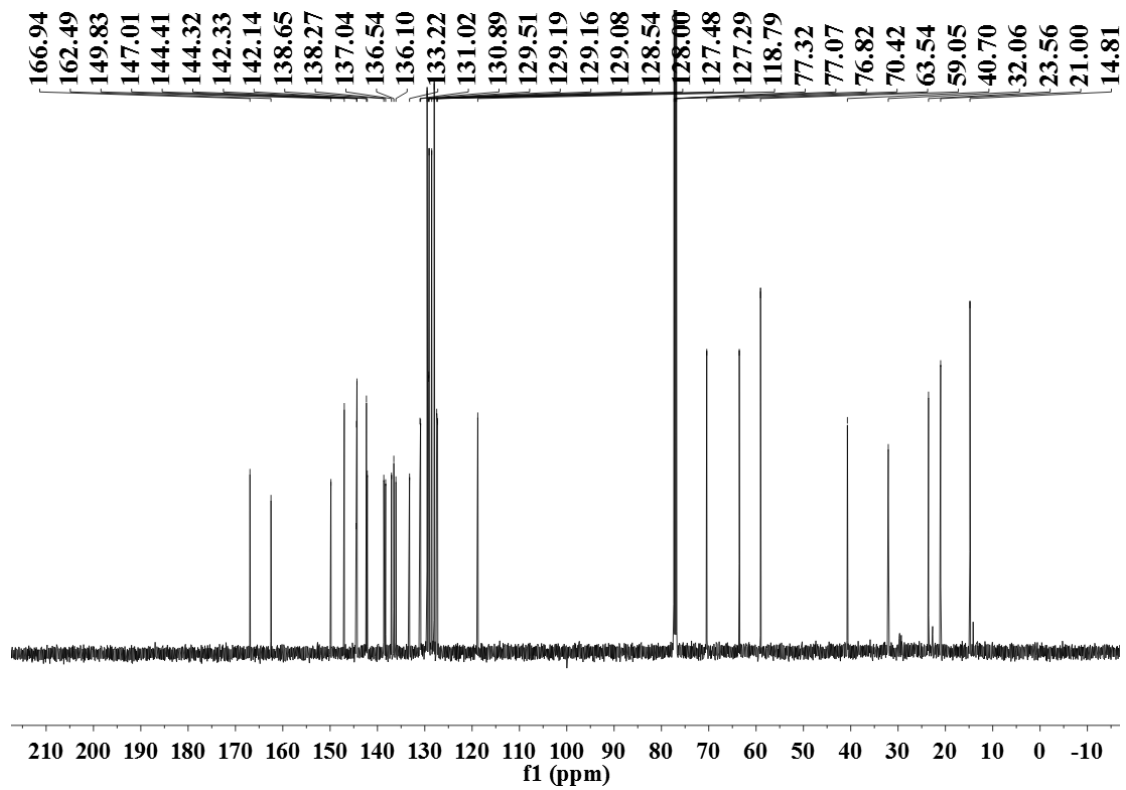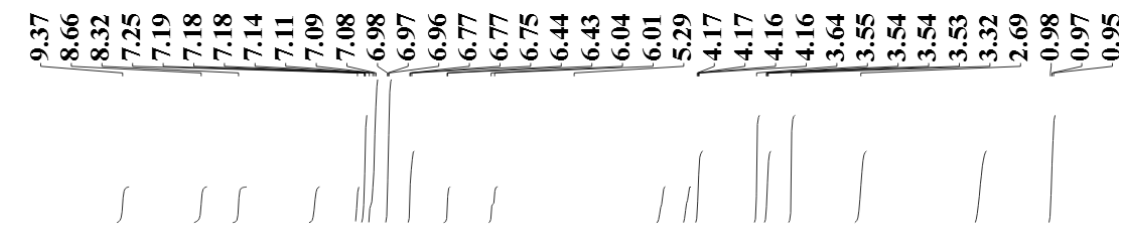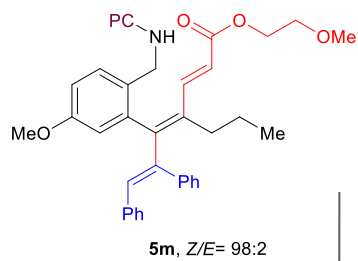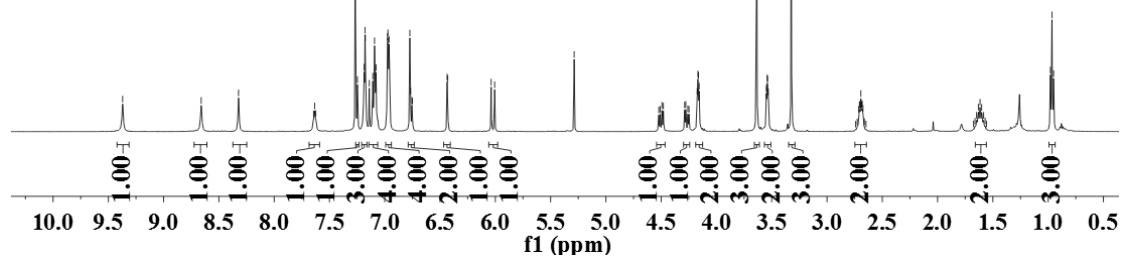

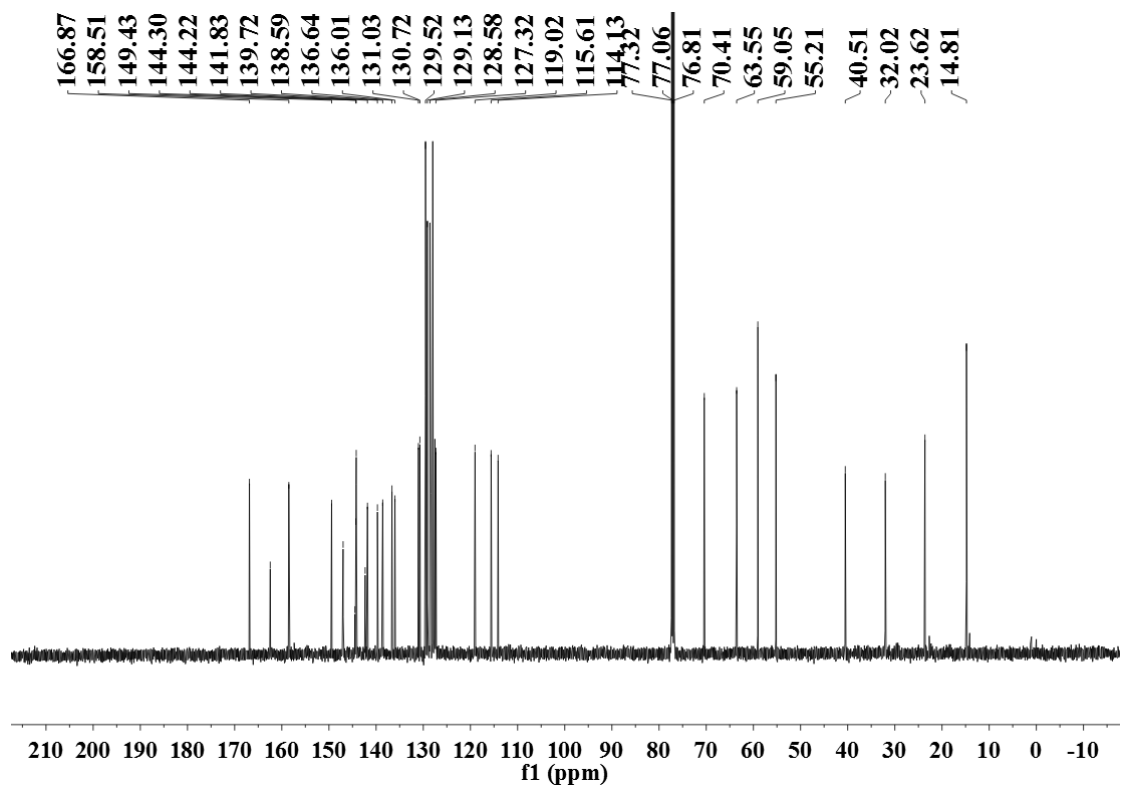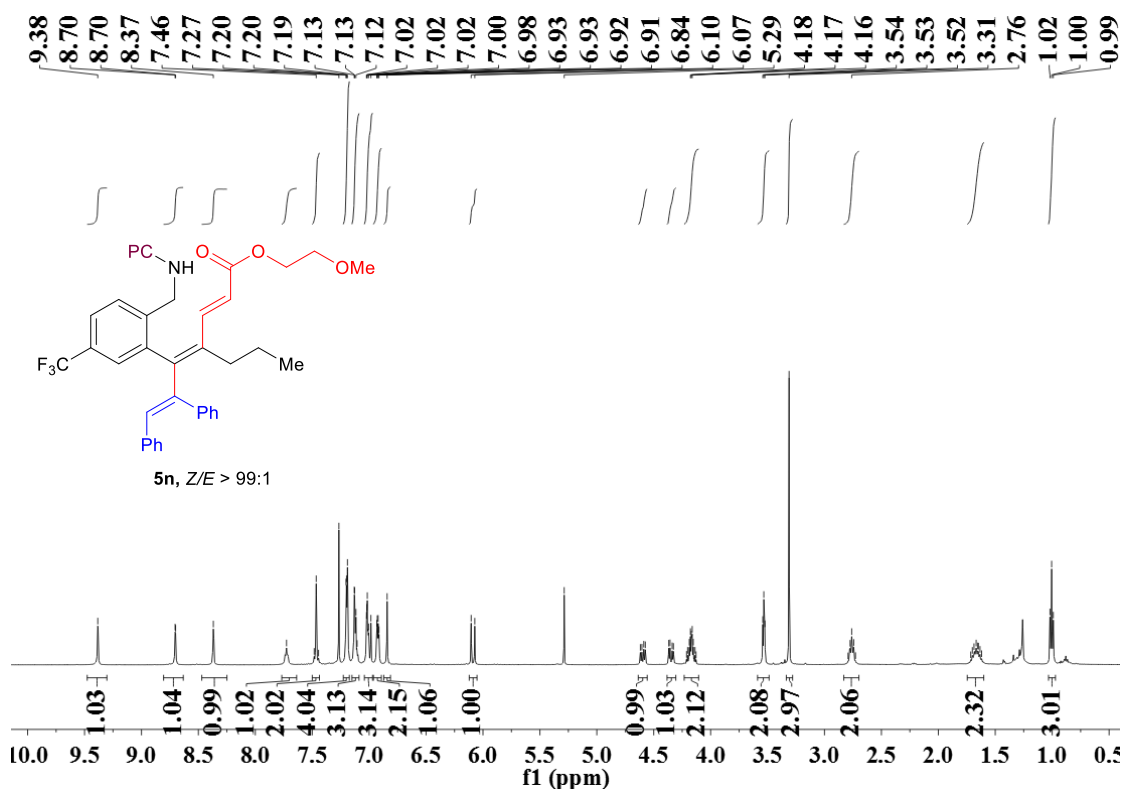

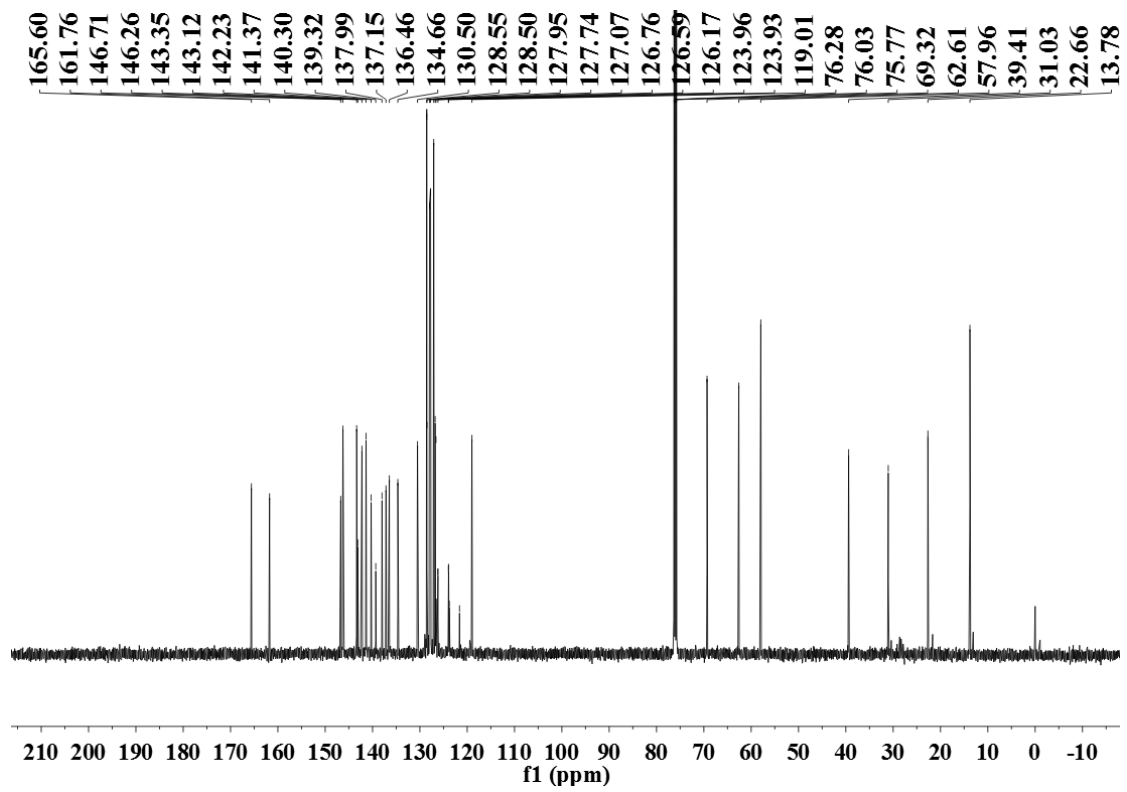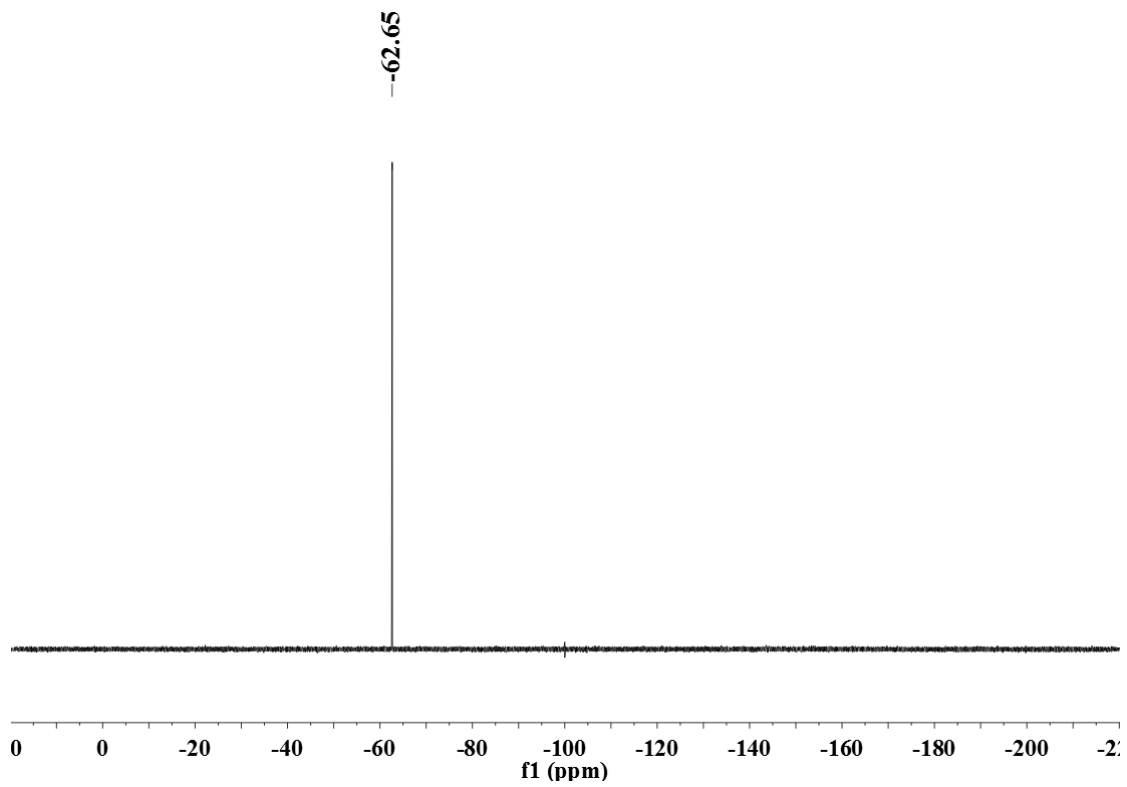

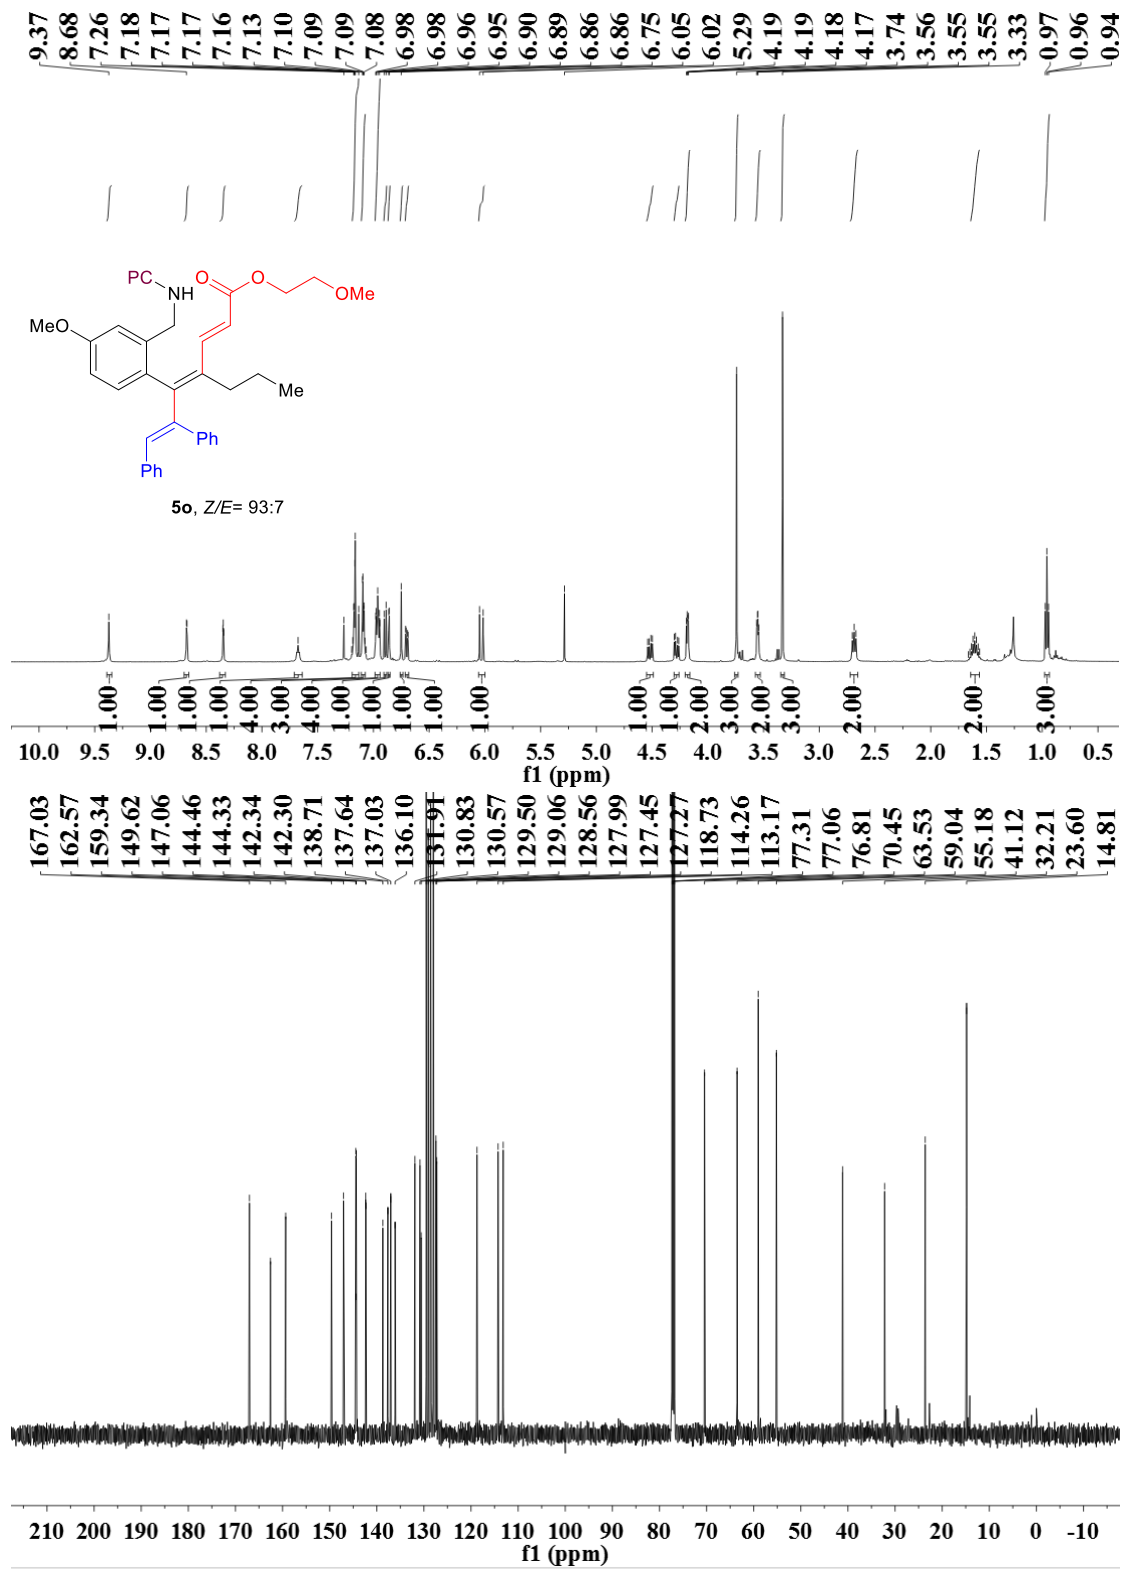



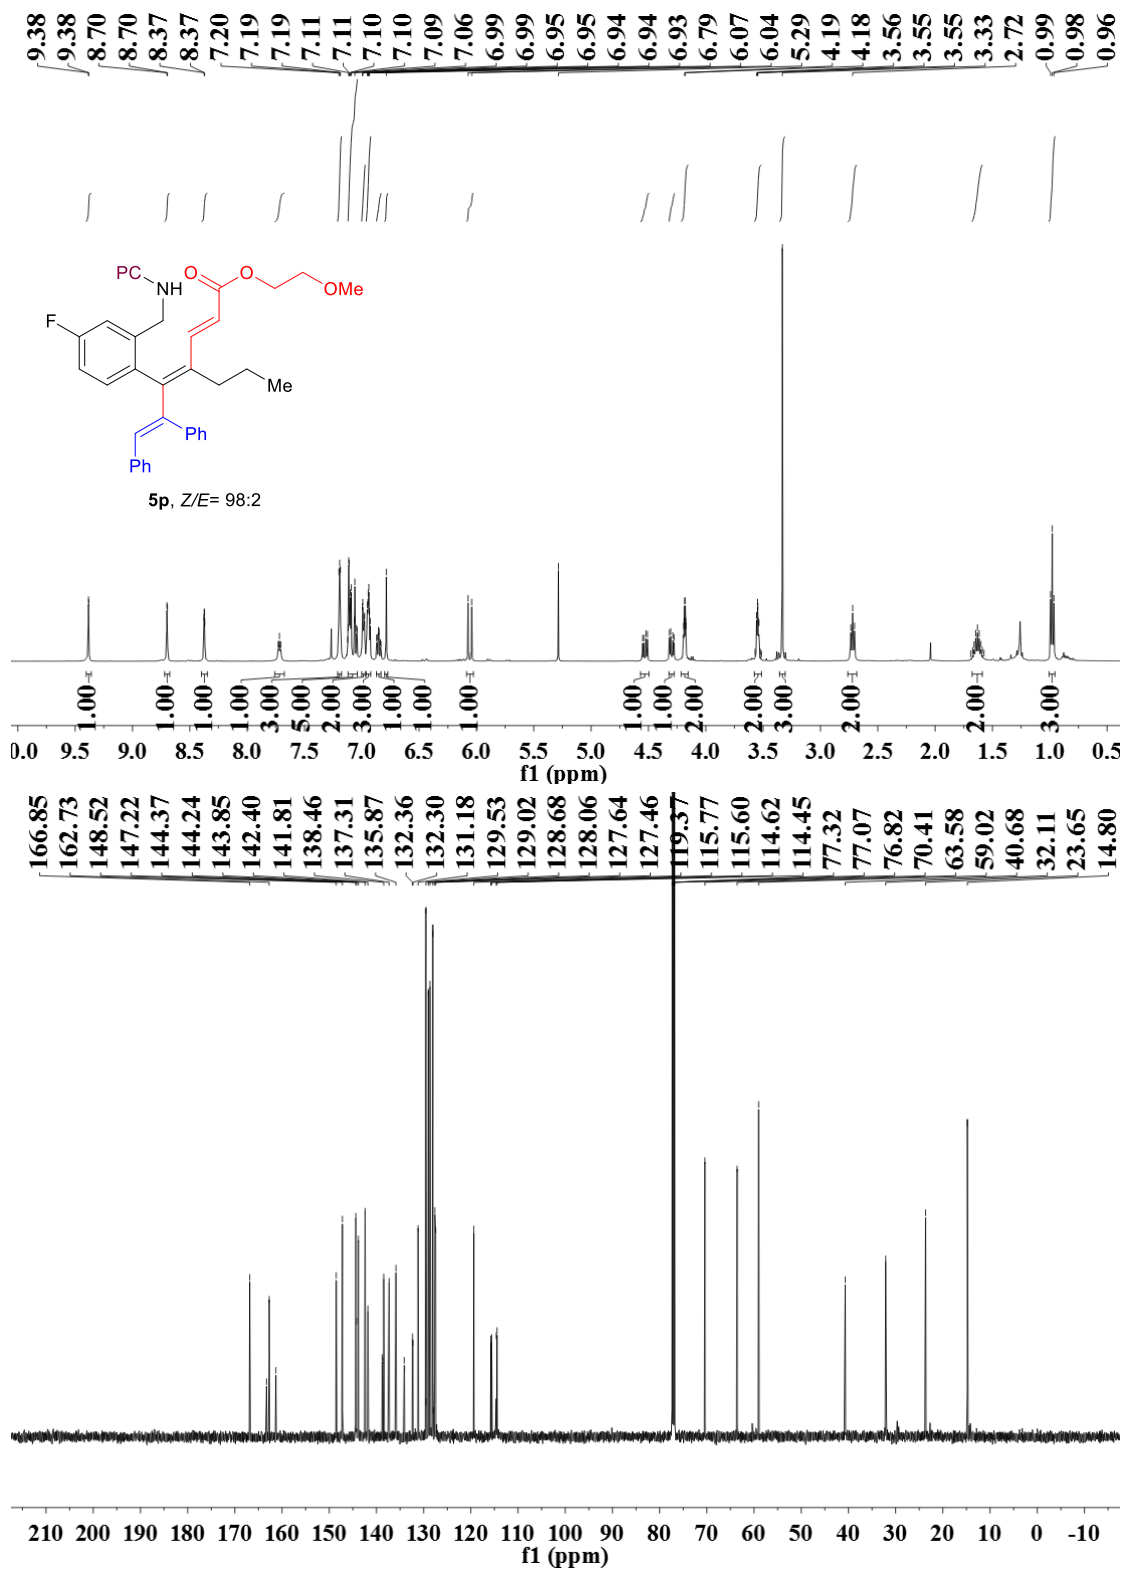

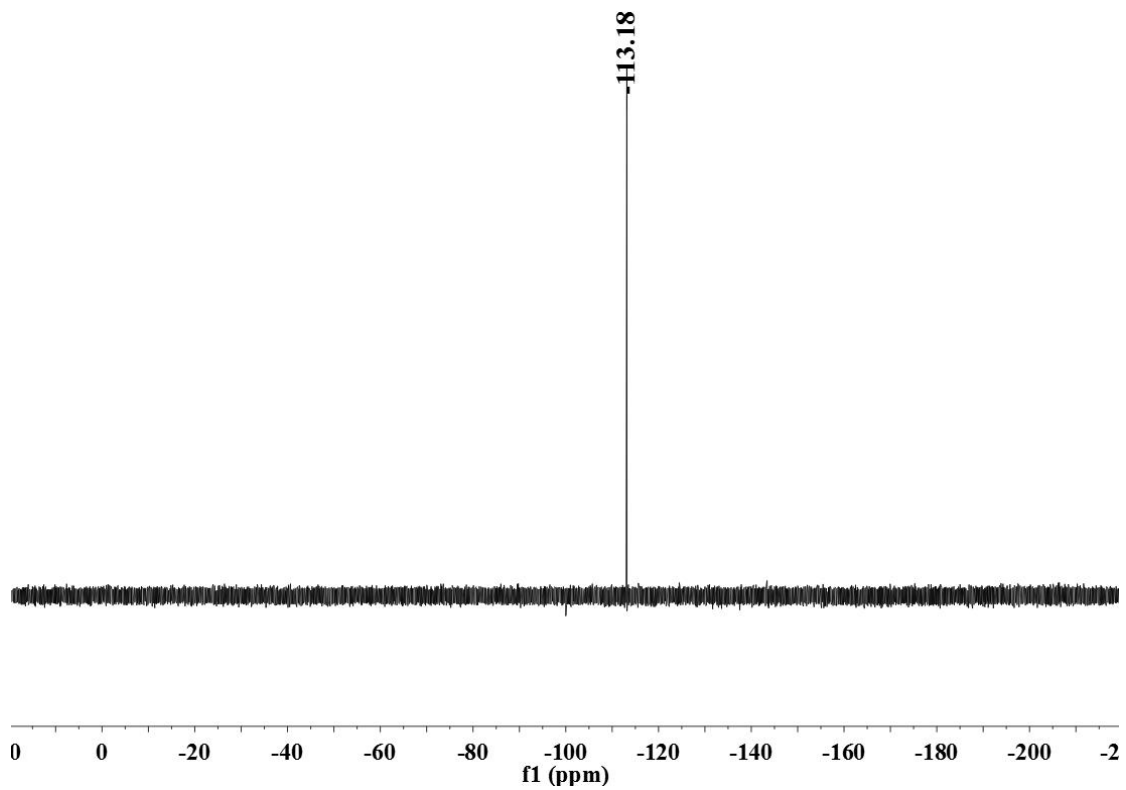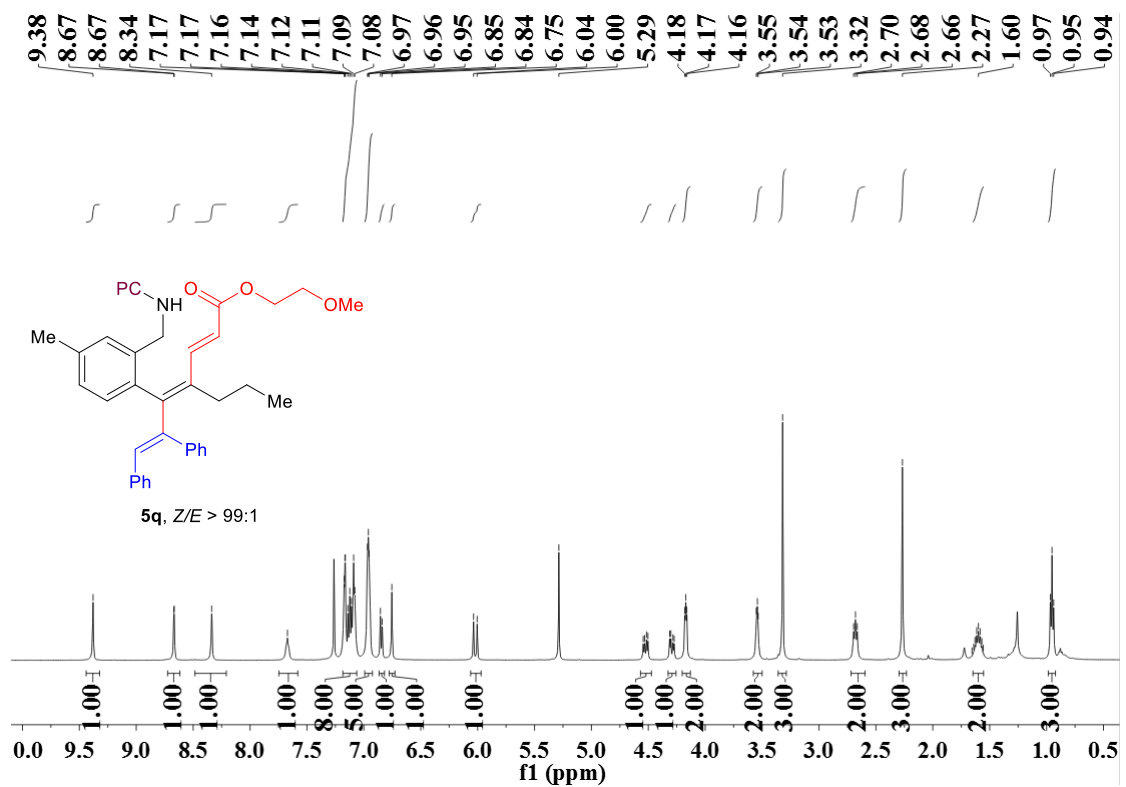

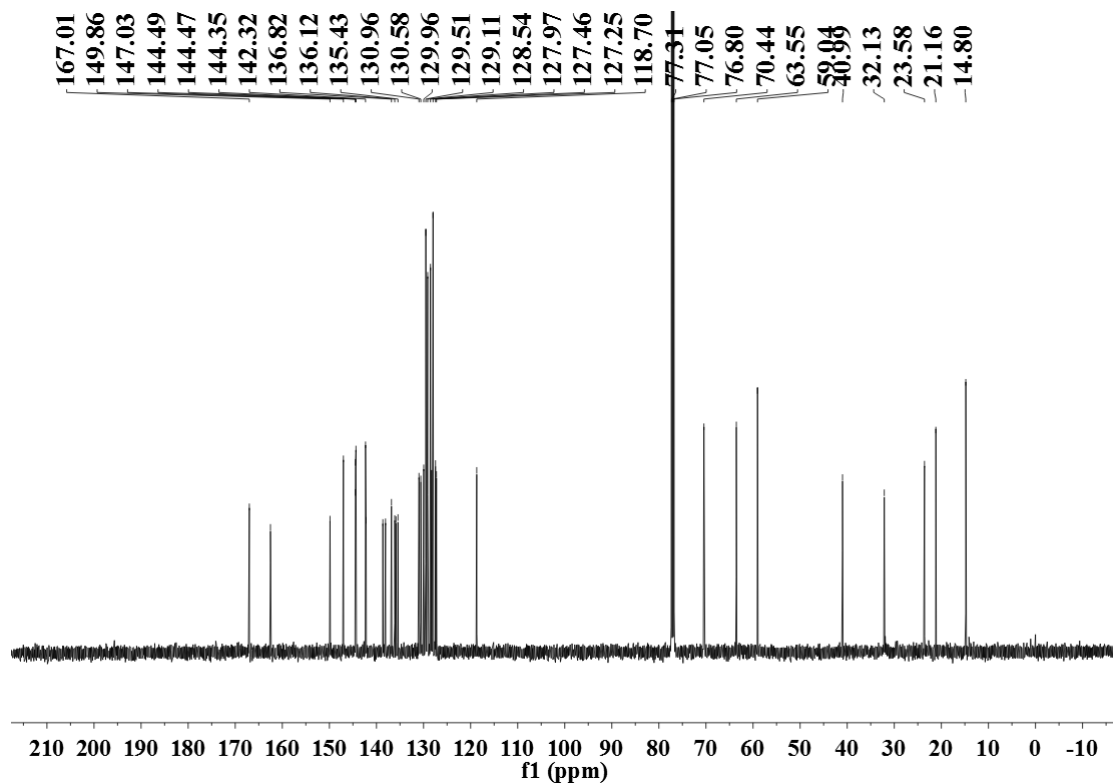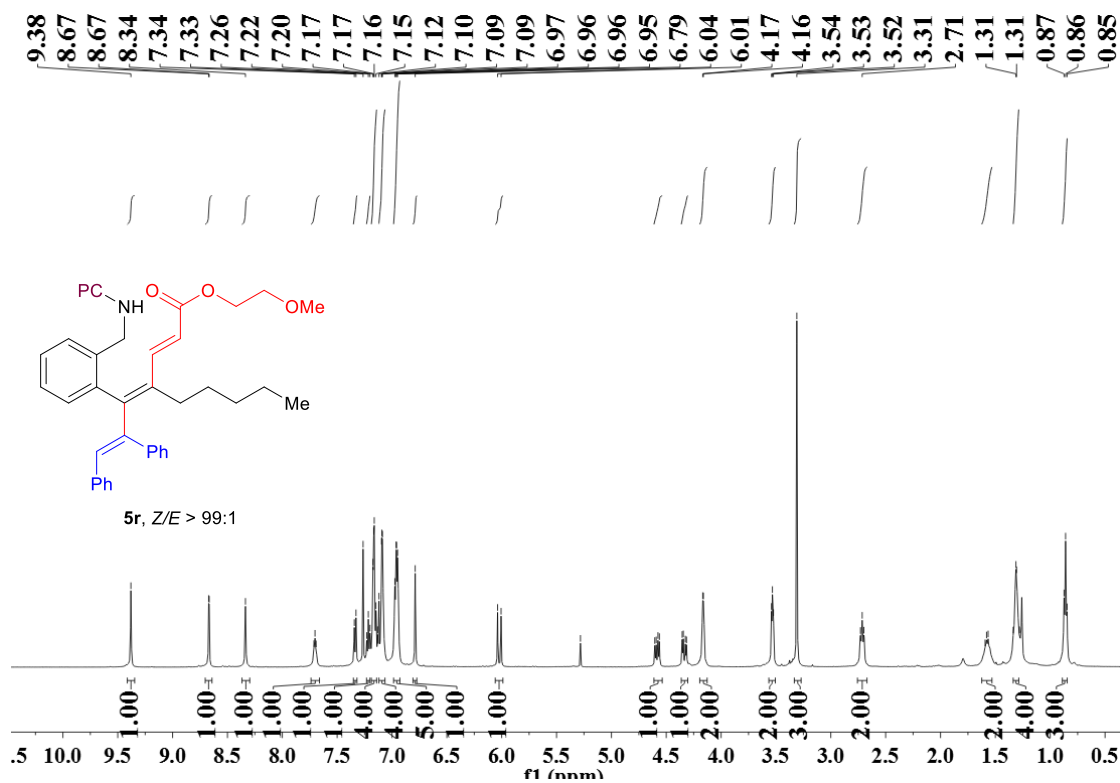

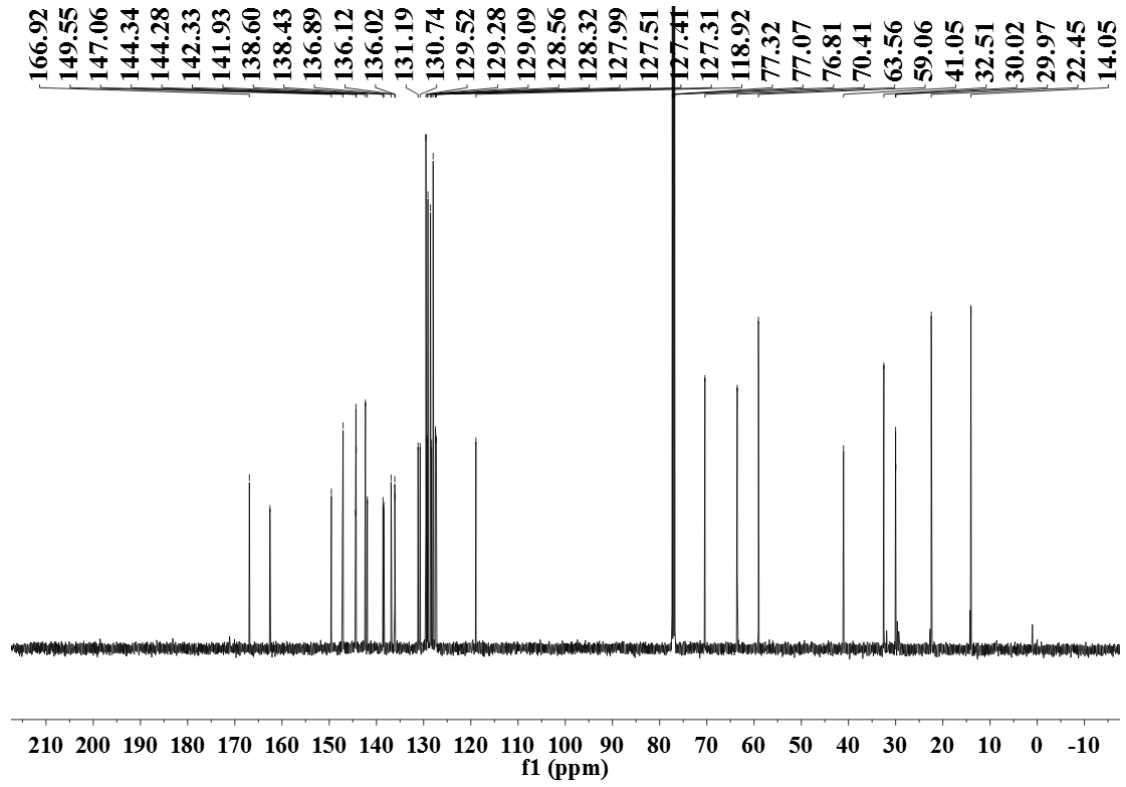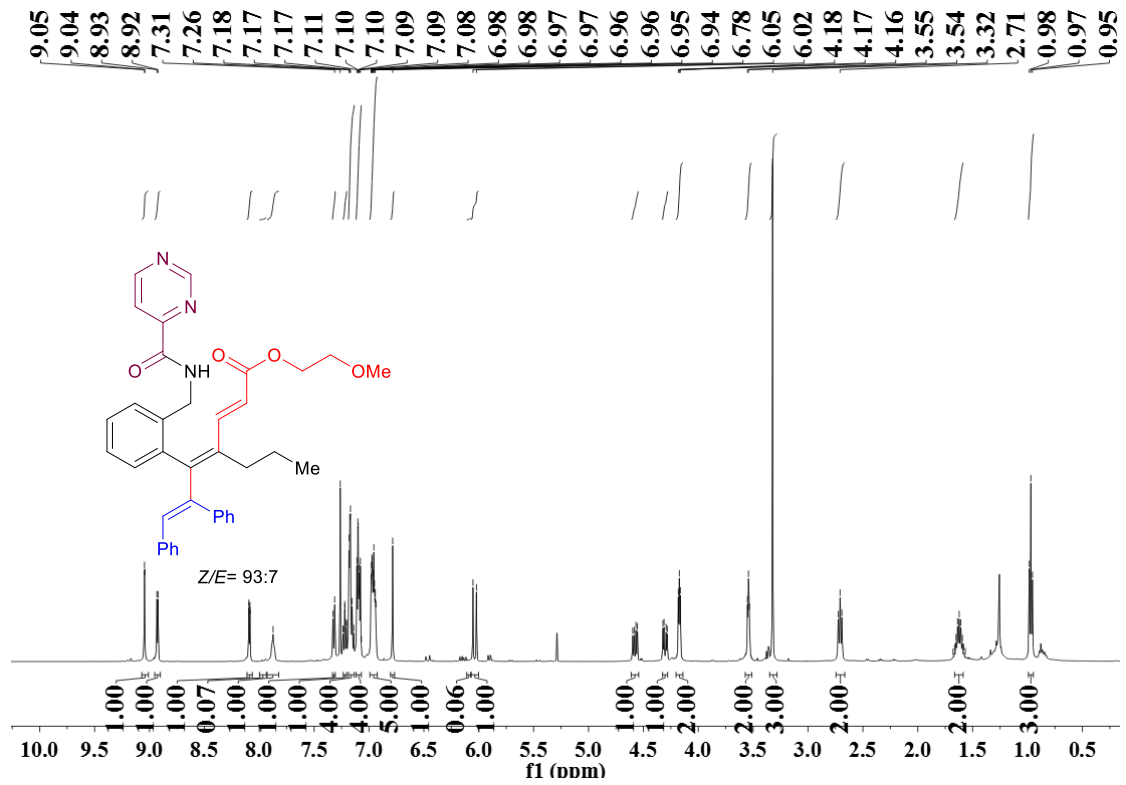

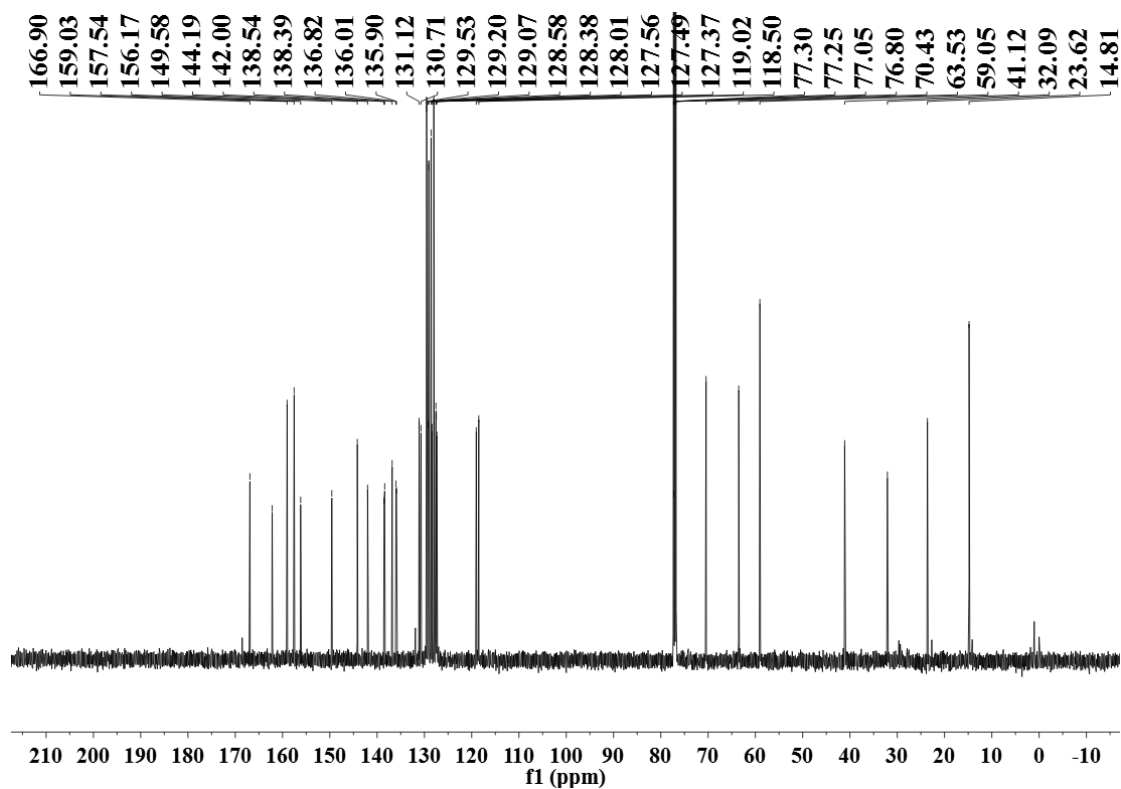

### 8.3 NMR Spectra of the Products 7

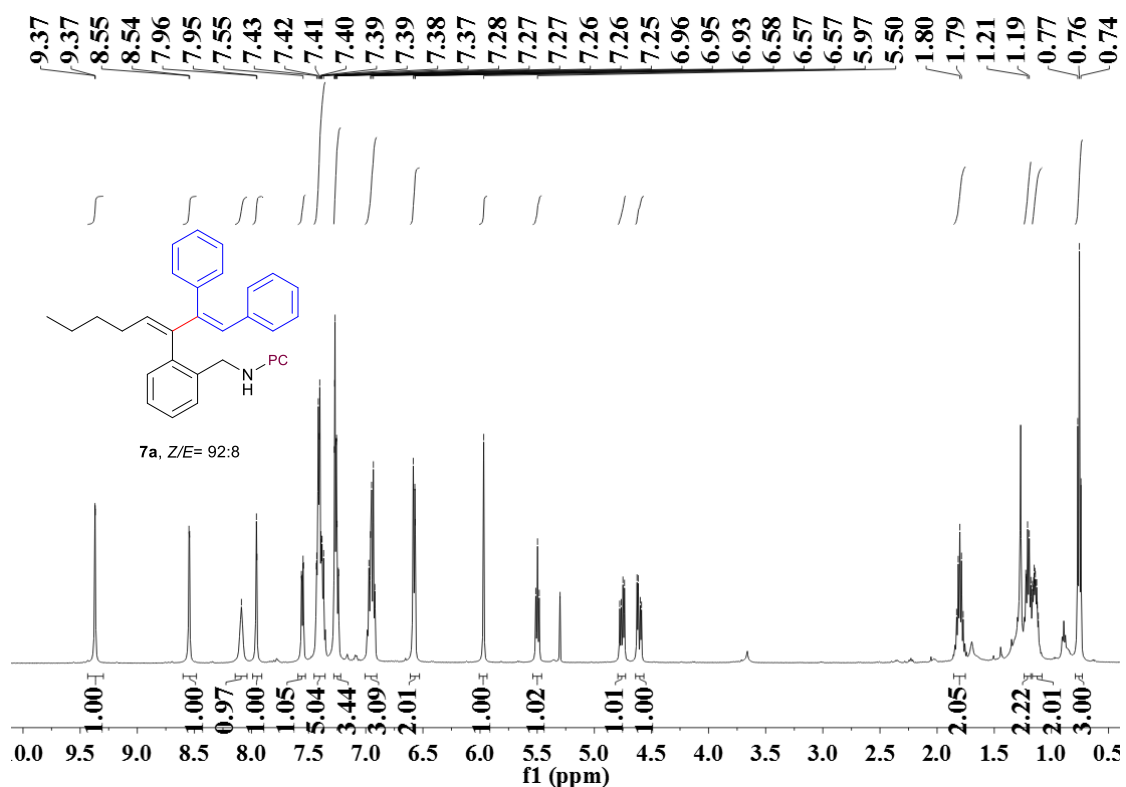

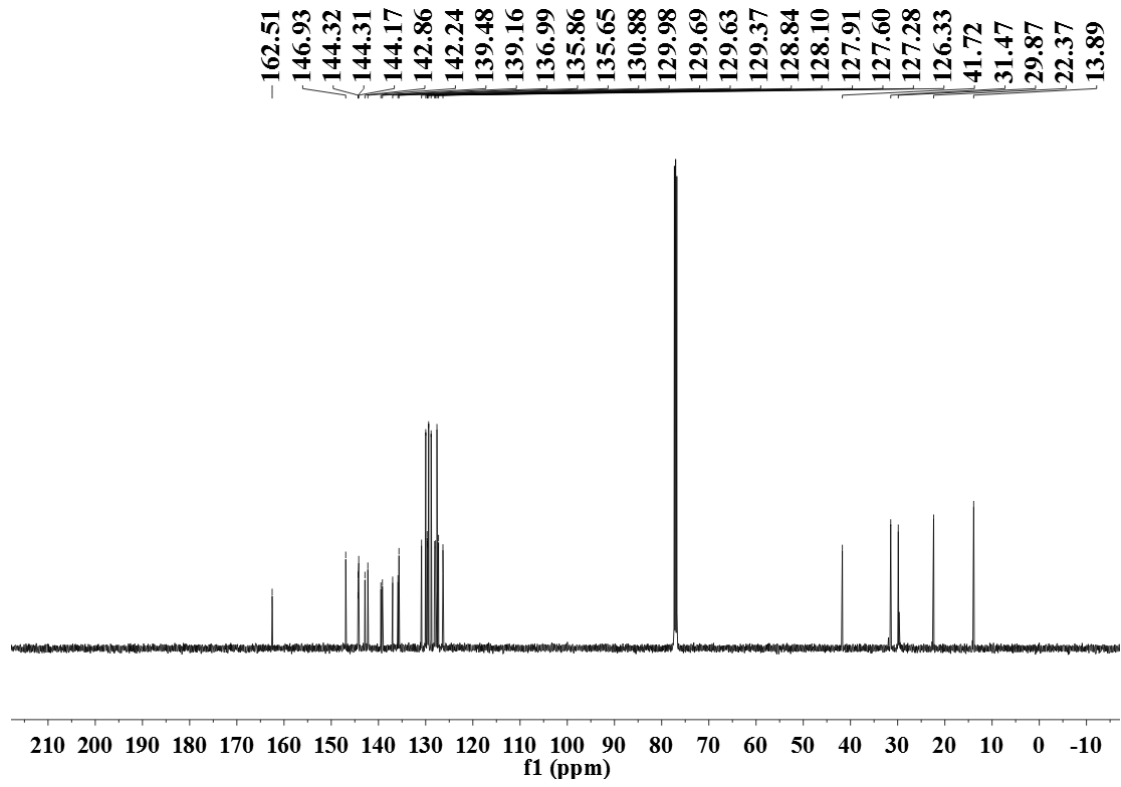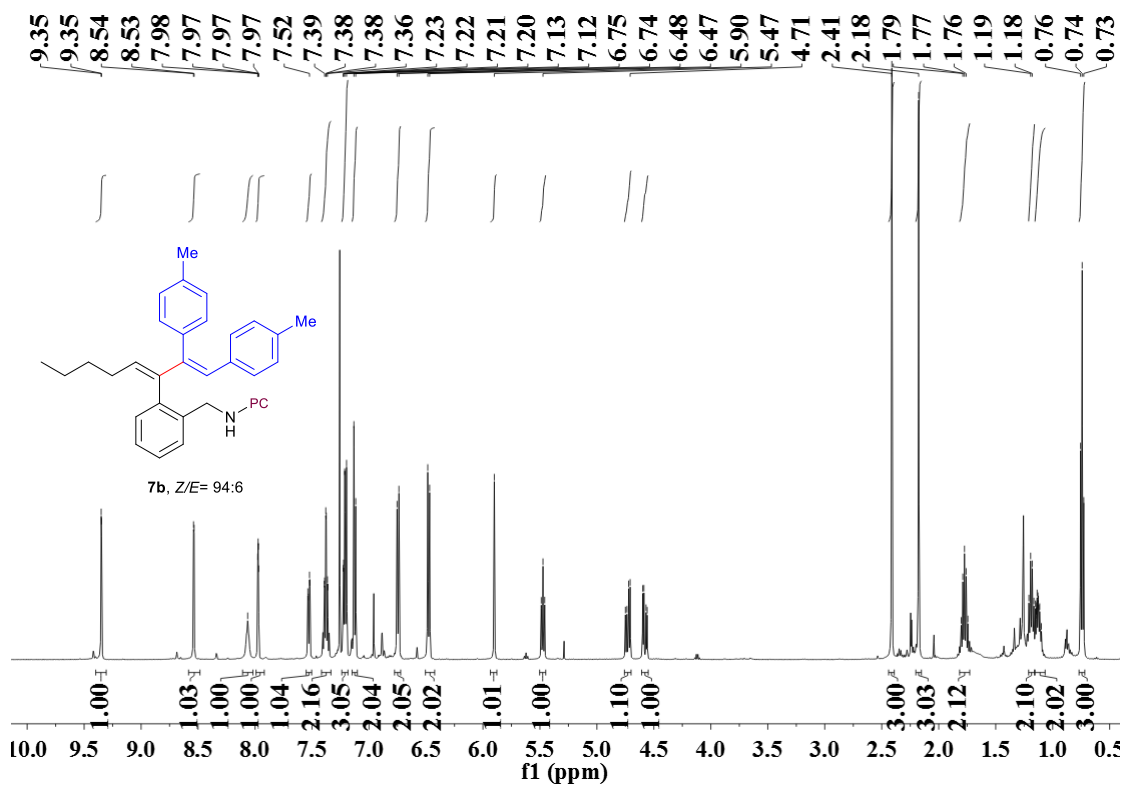

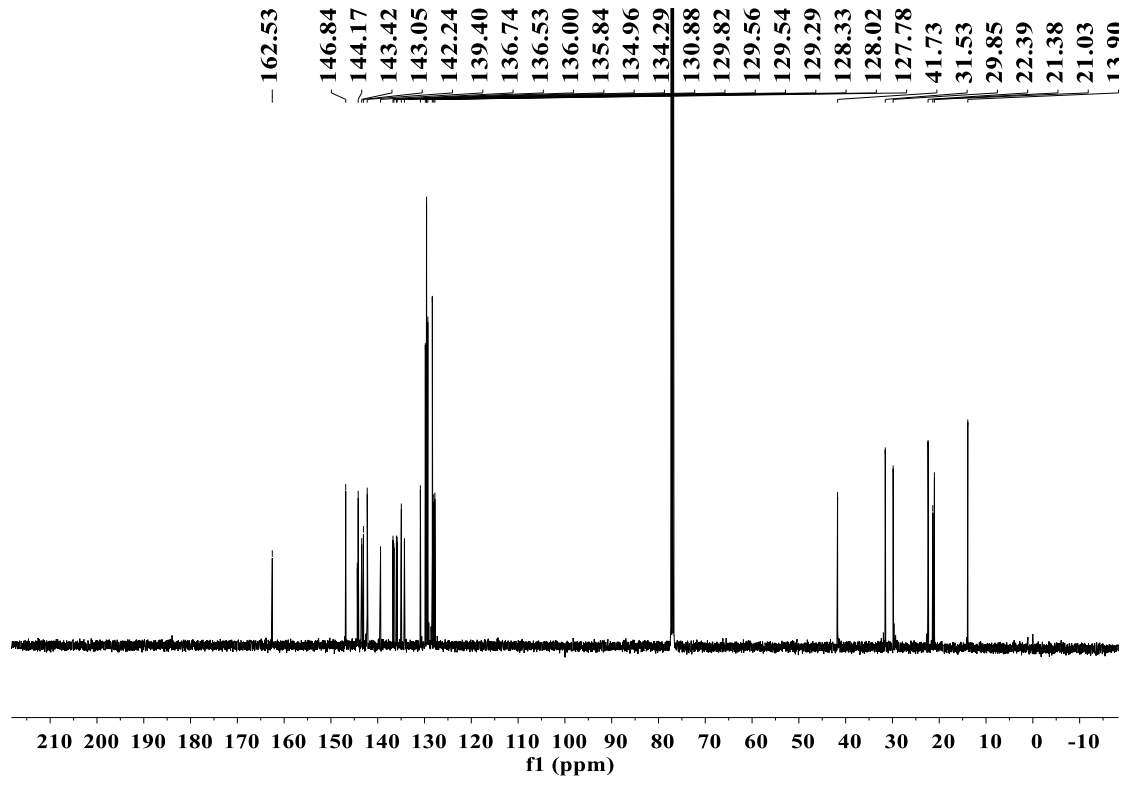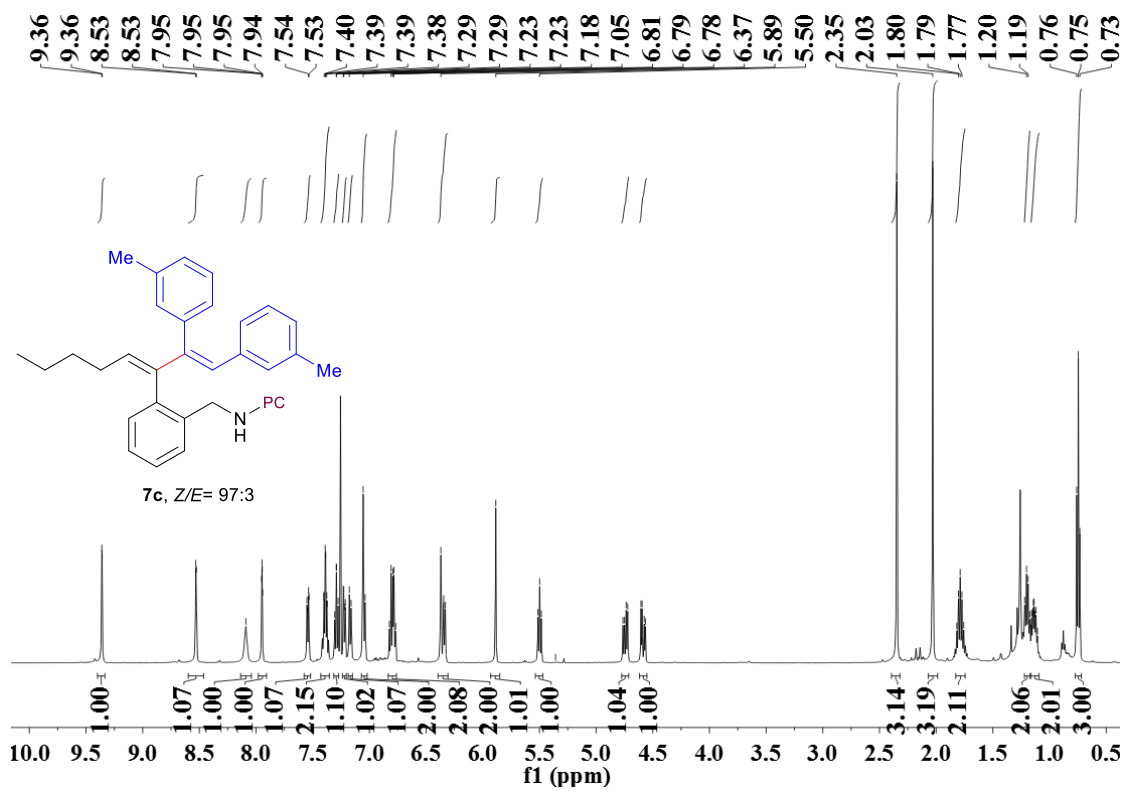

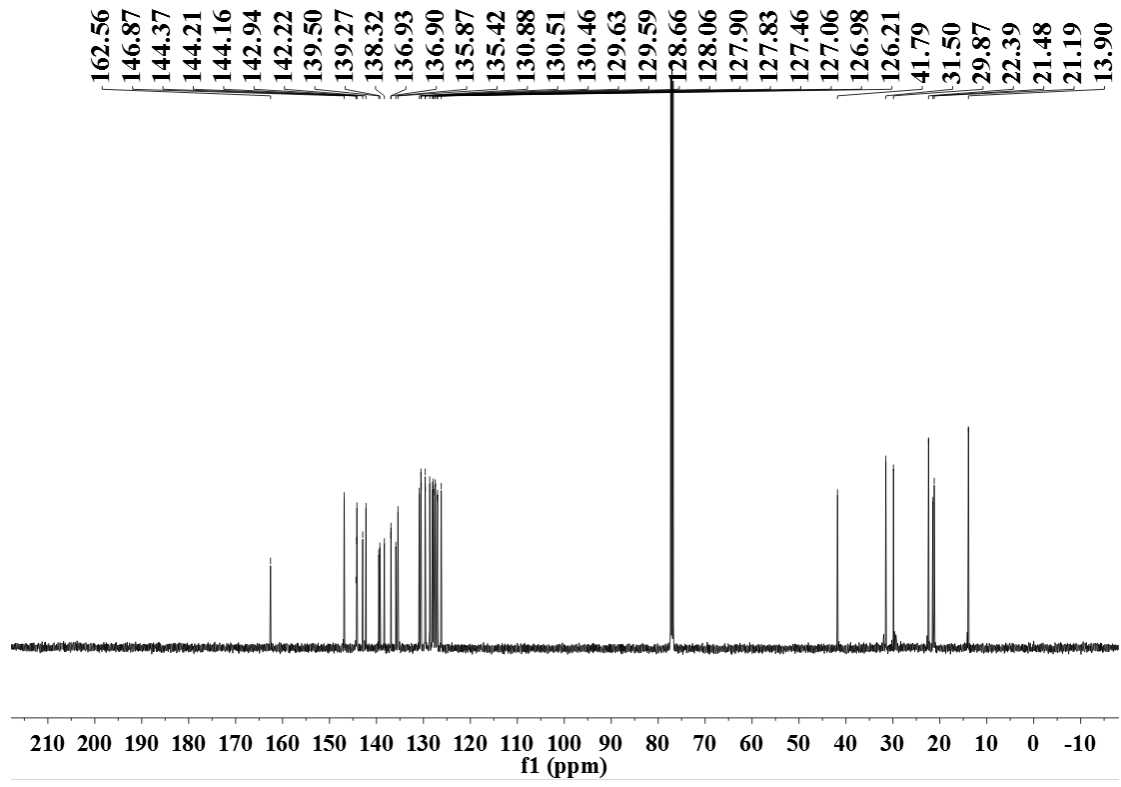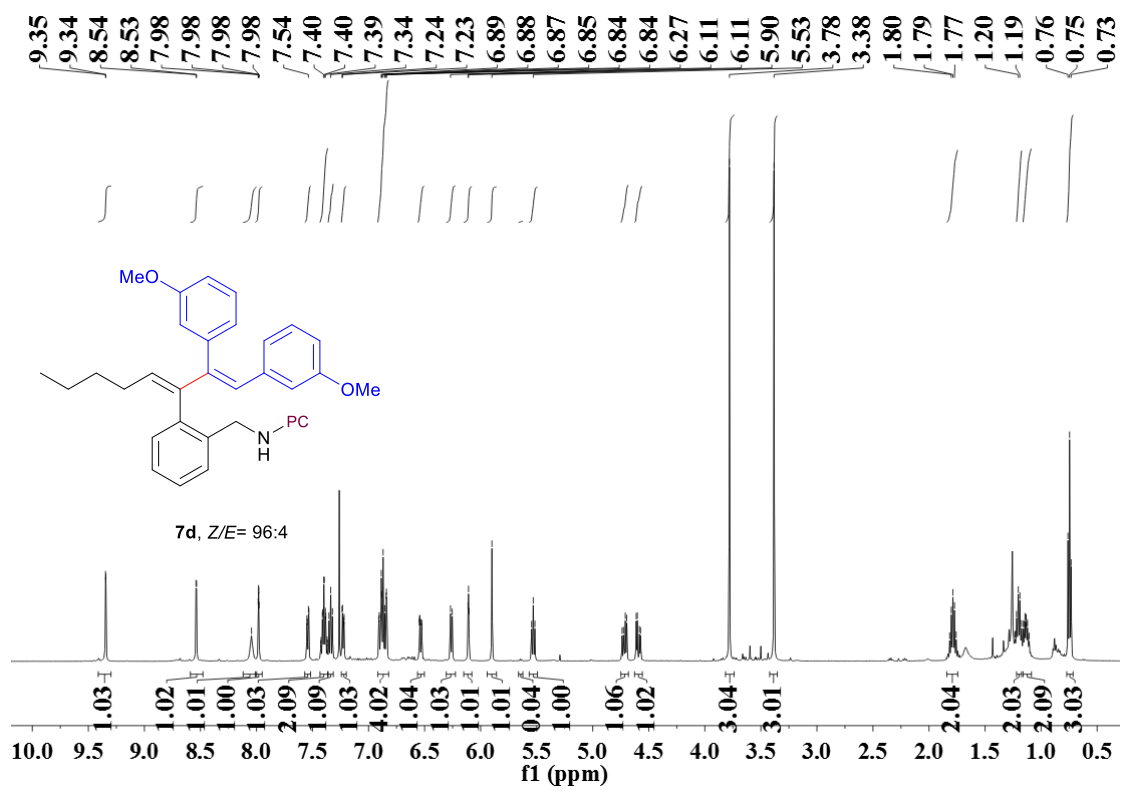



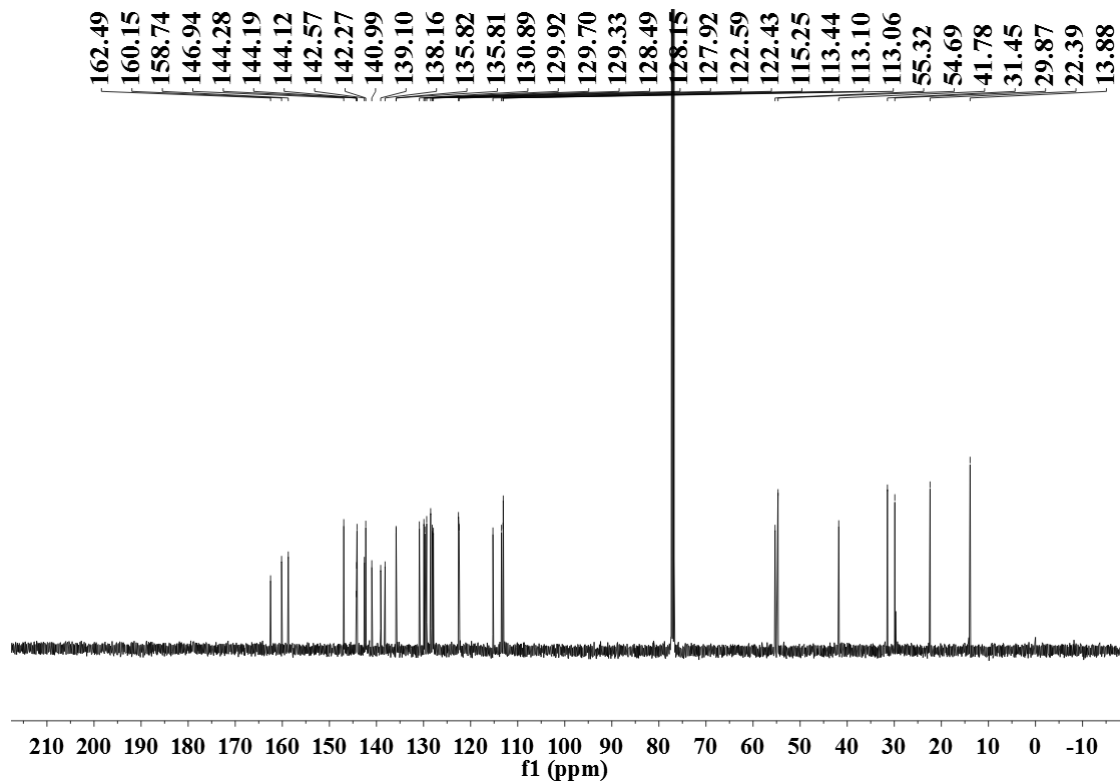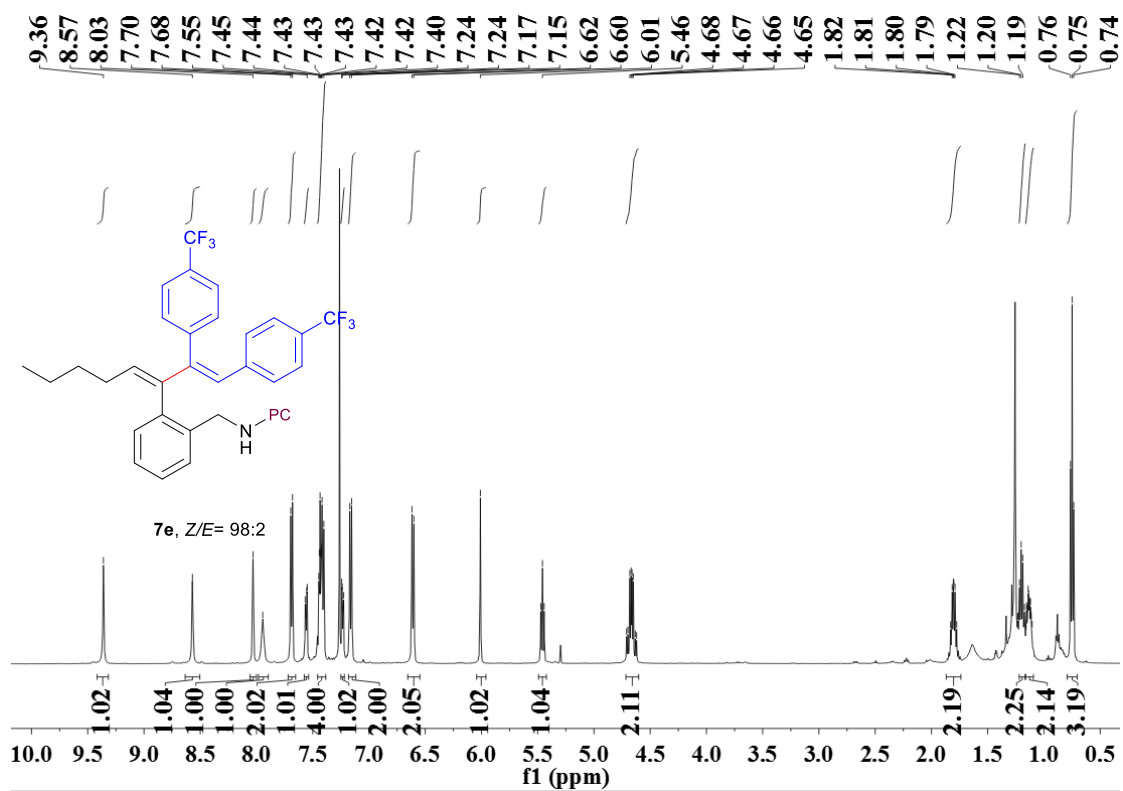

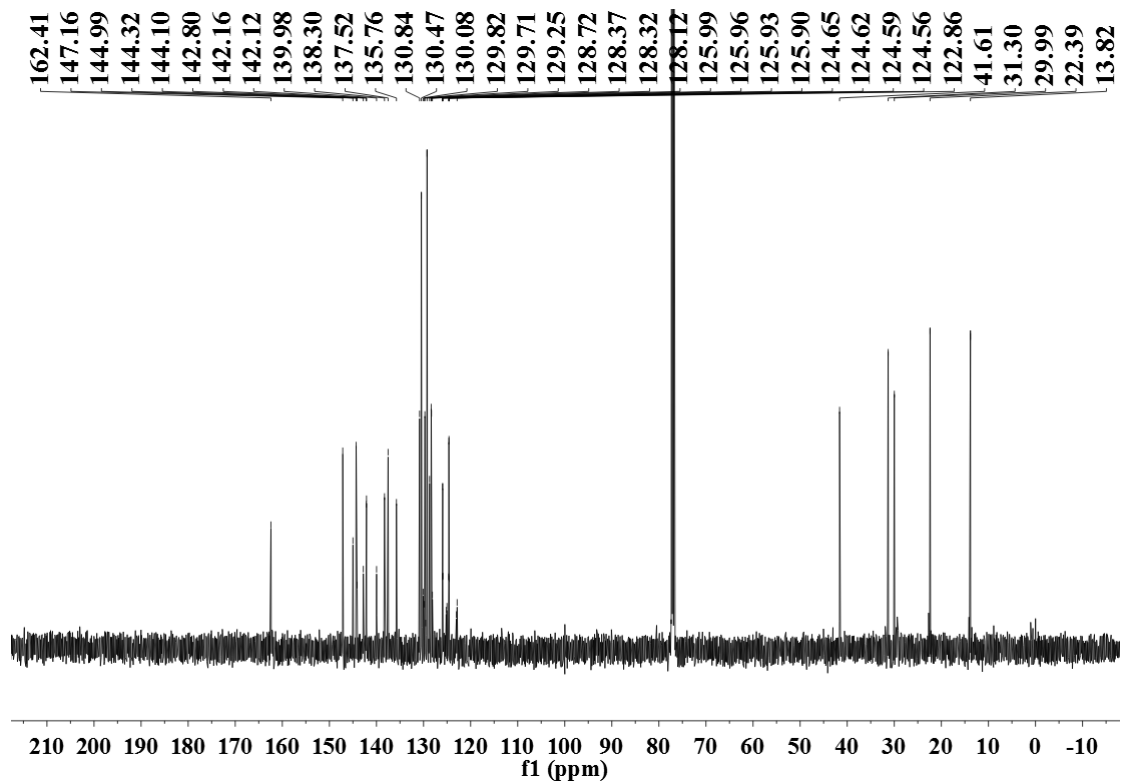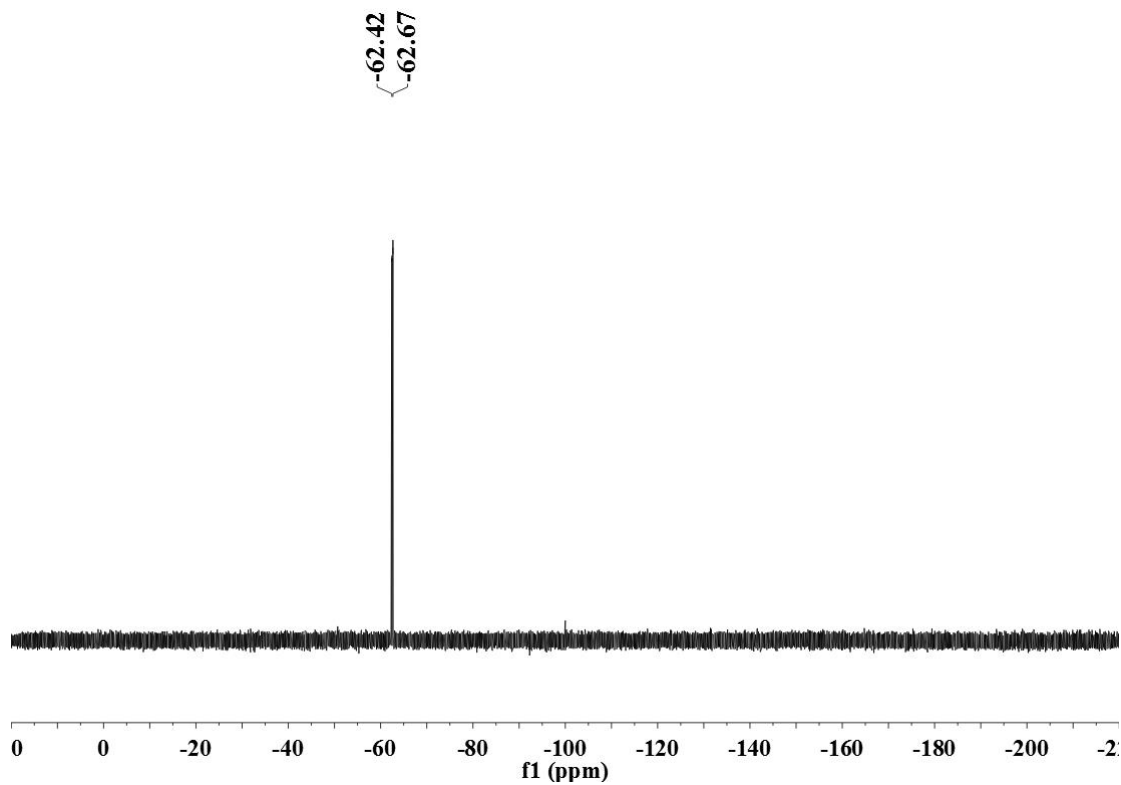

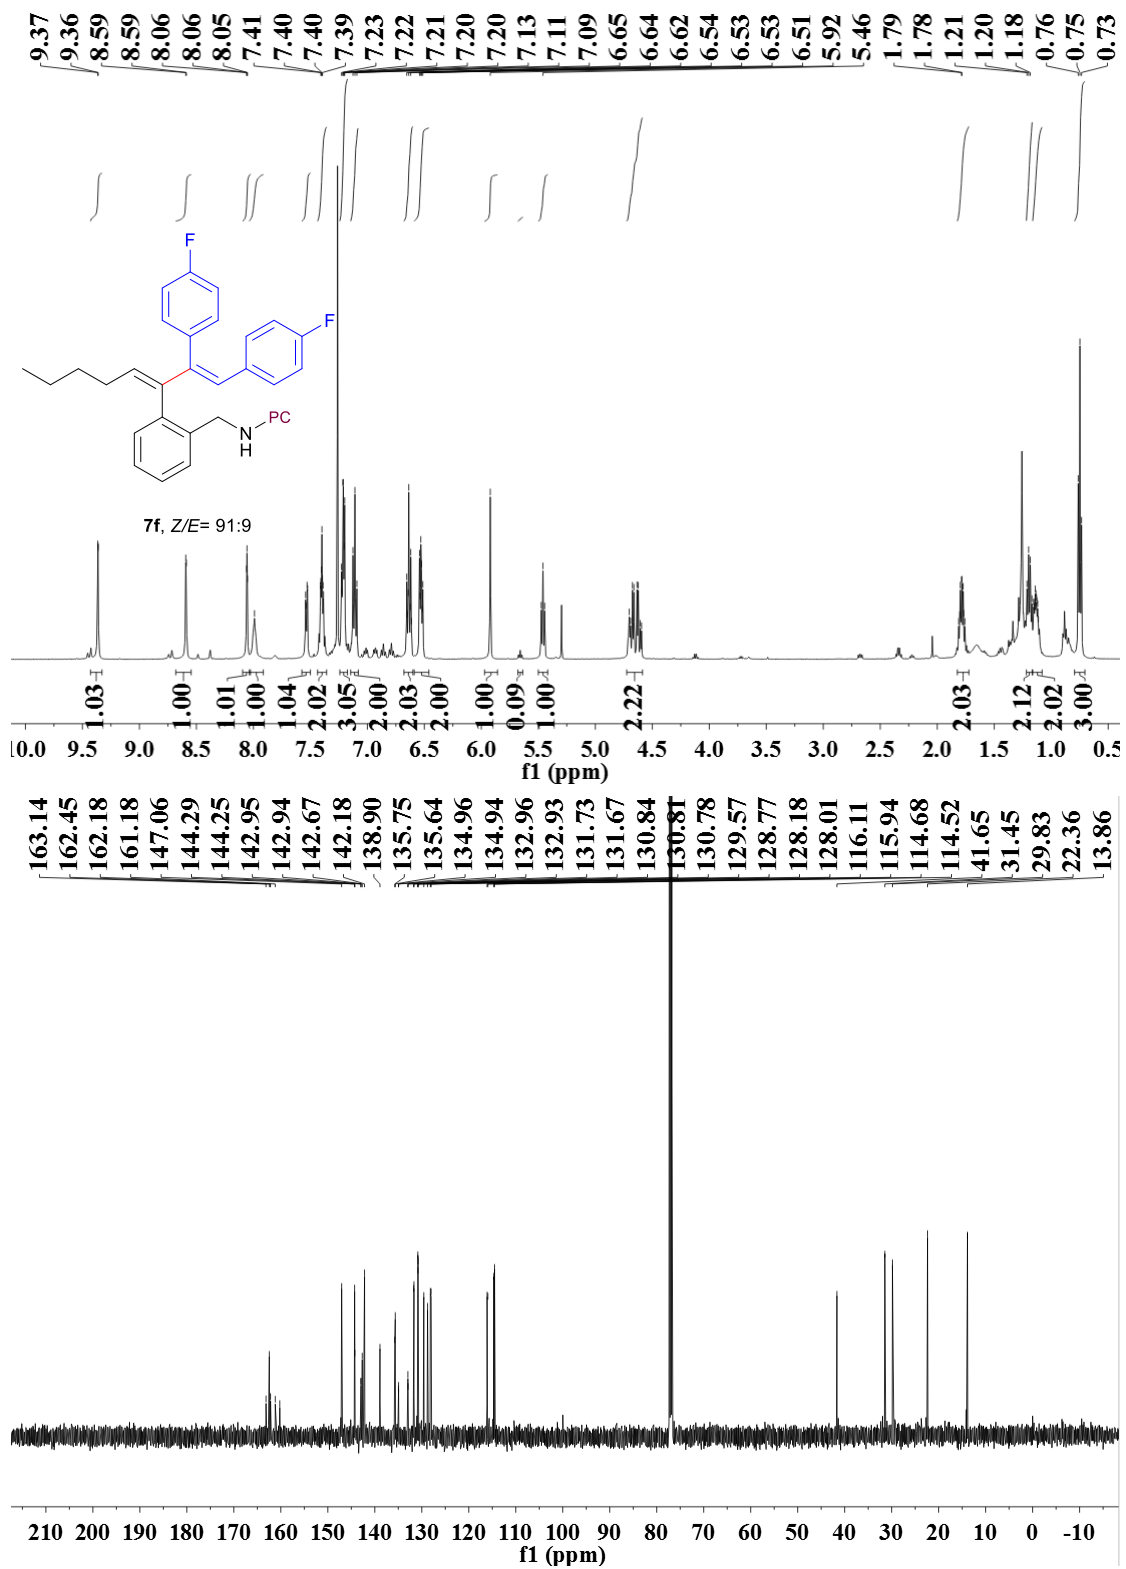

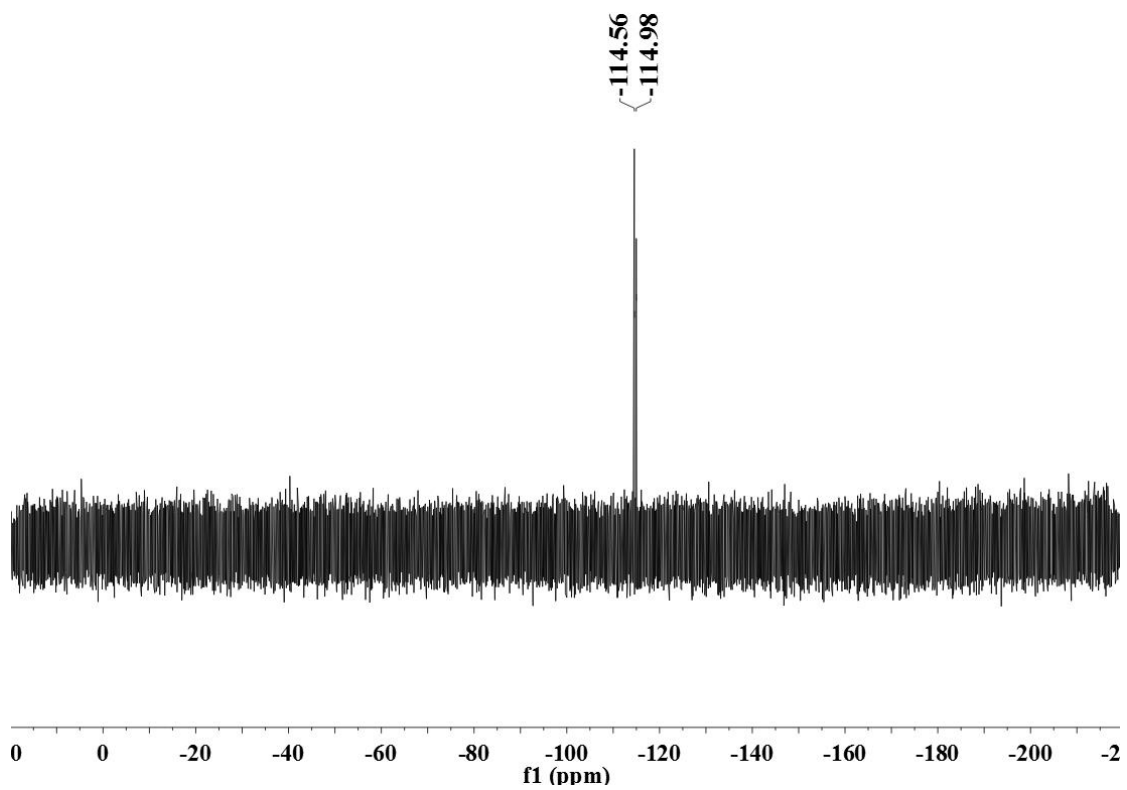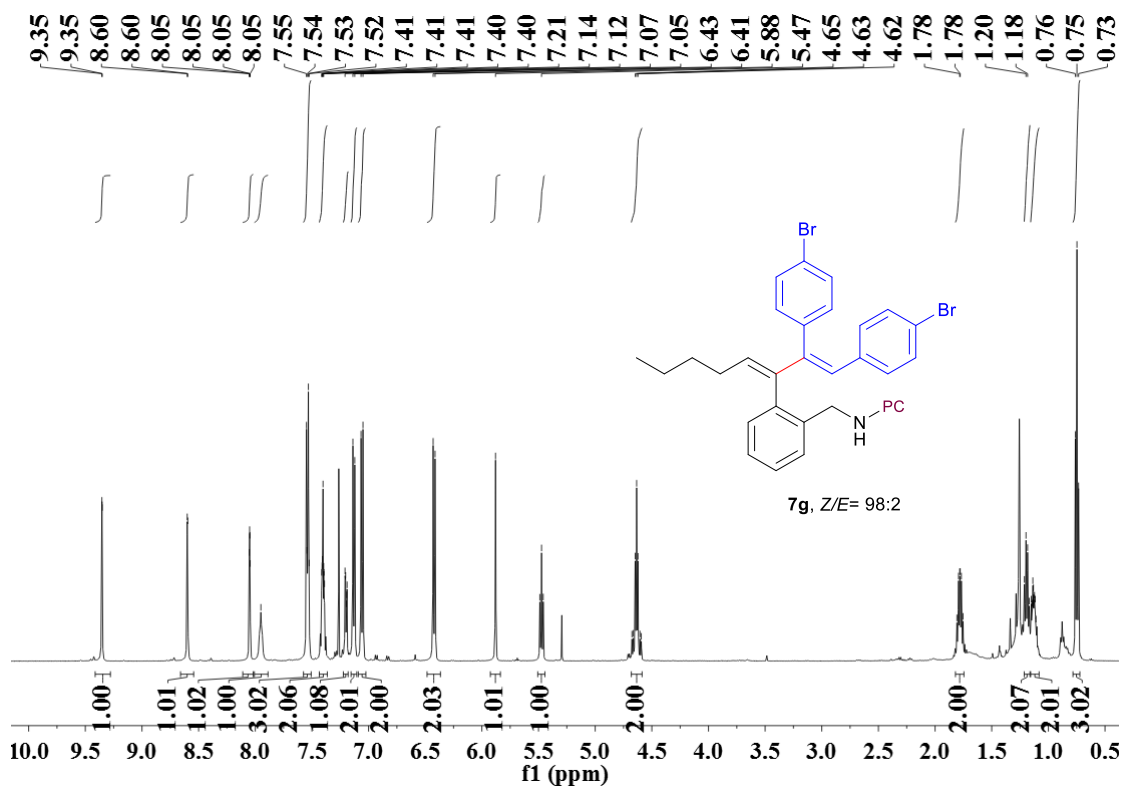

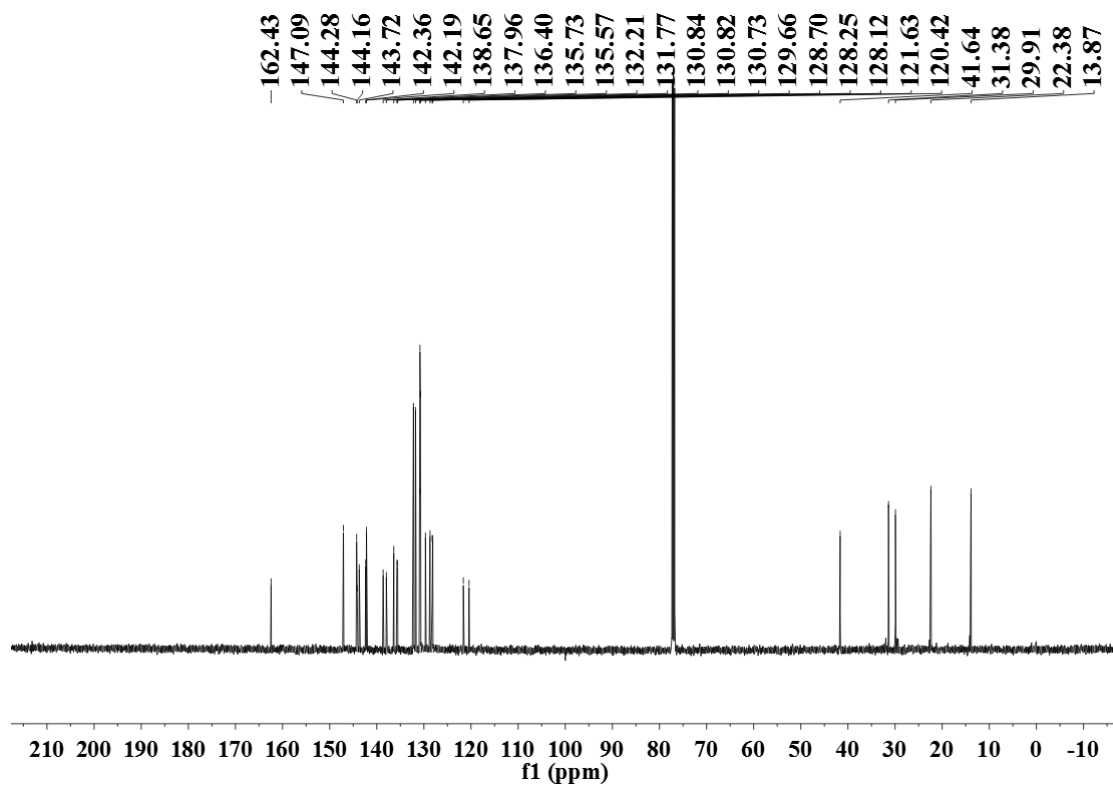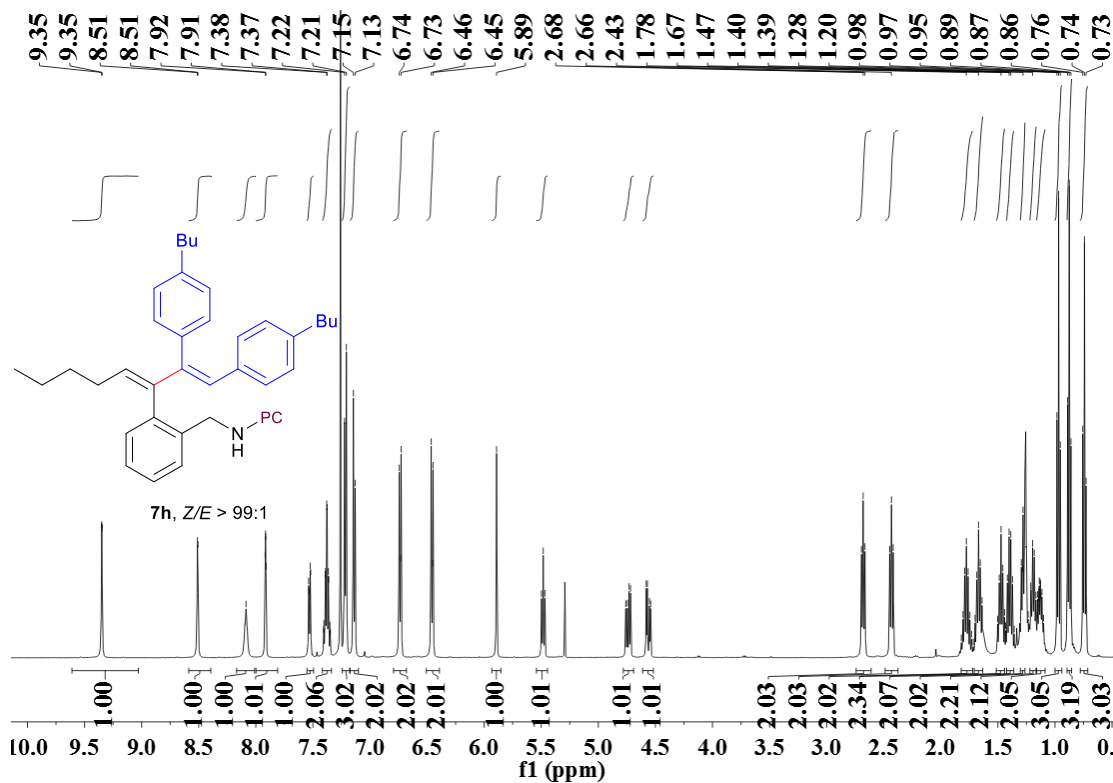

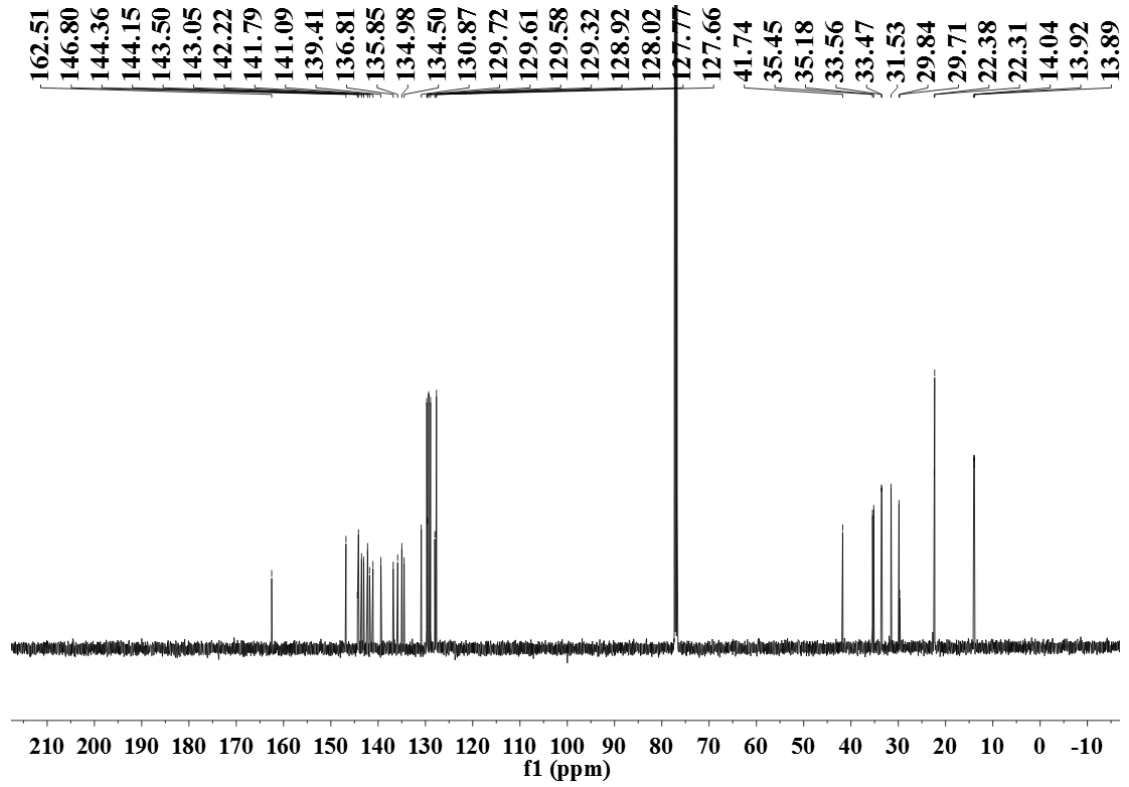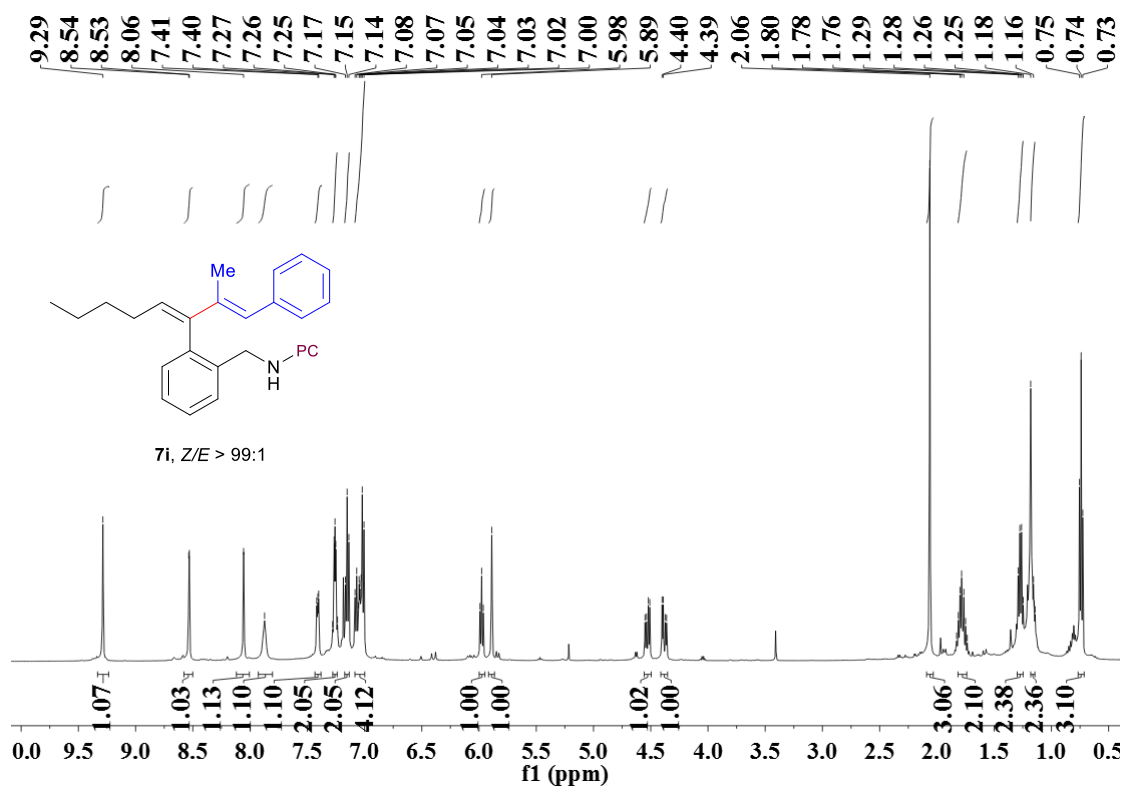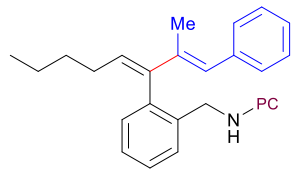

7i, Z/E > 99:1

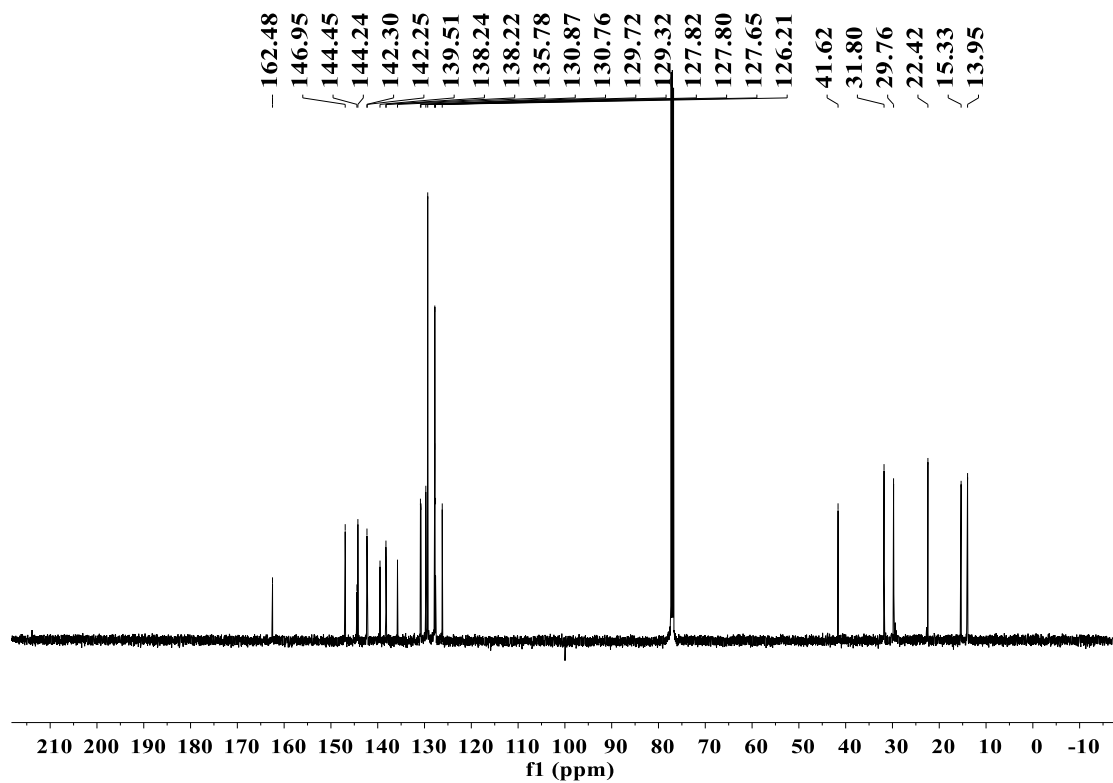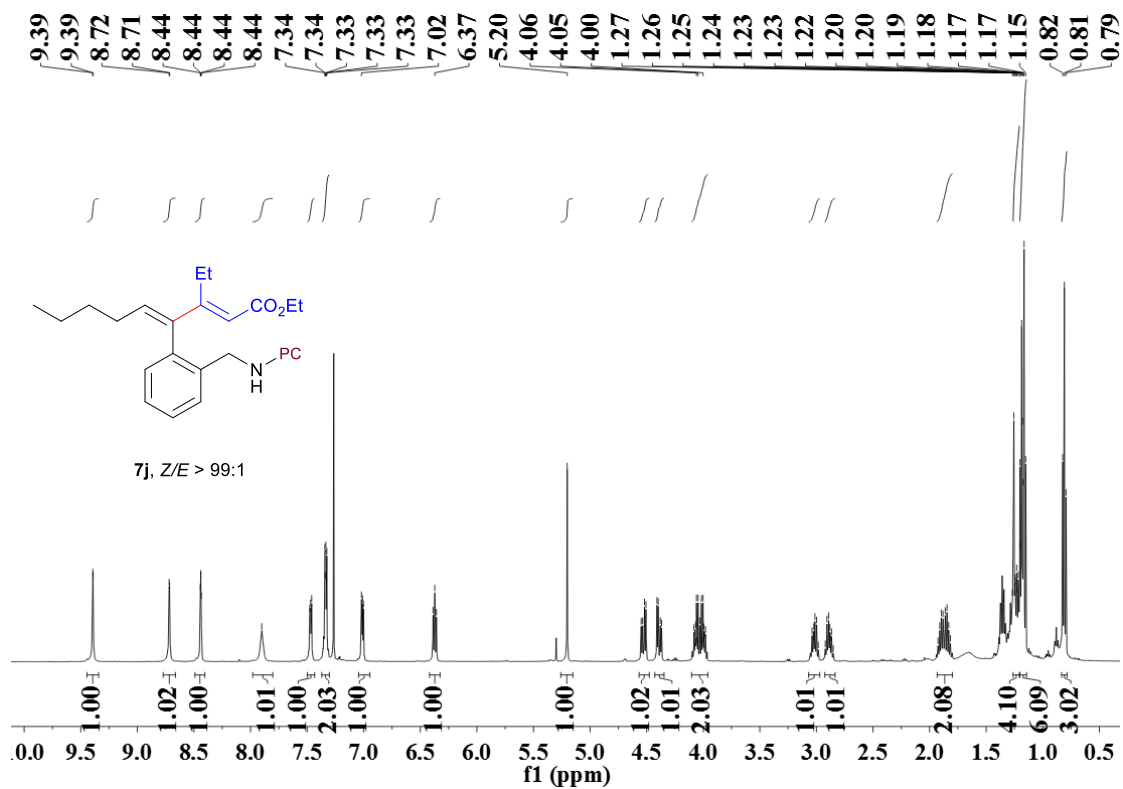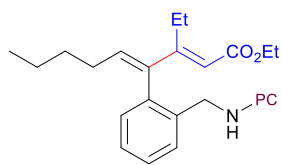

7j, Z/E > 99:1

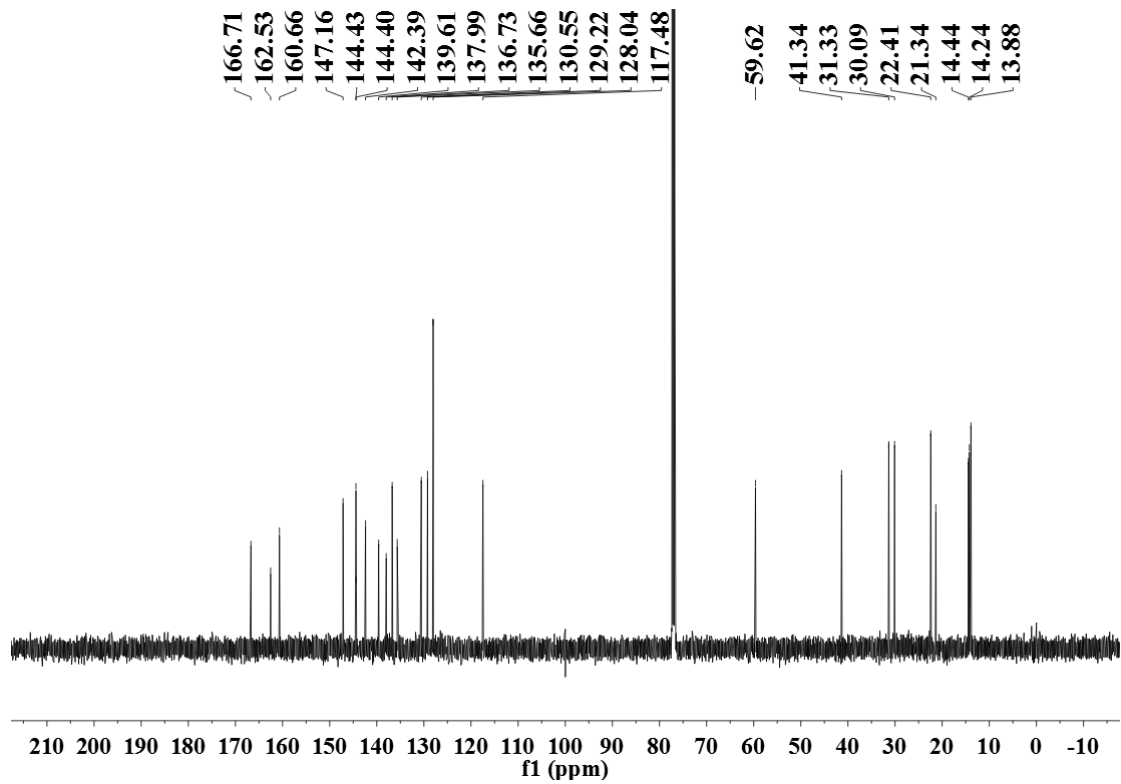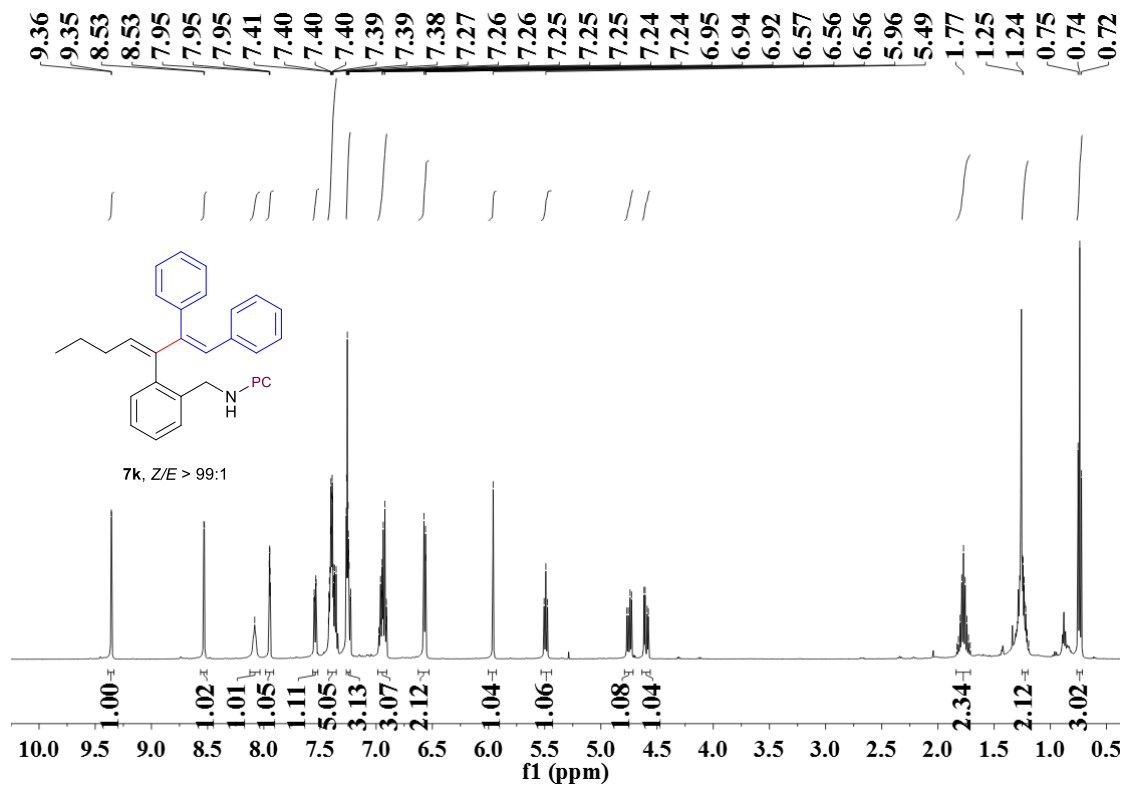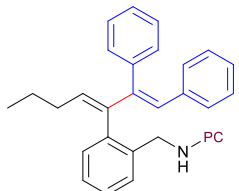

7k, Z/E > 99:1



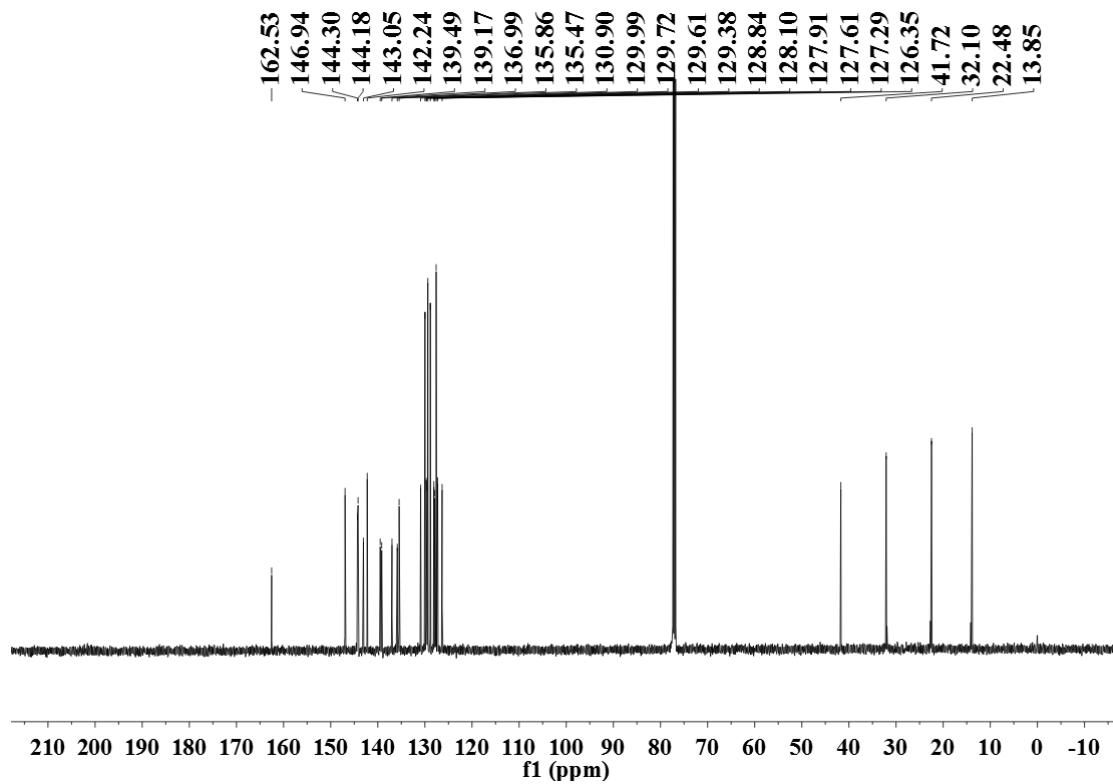

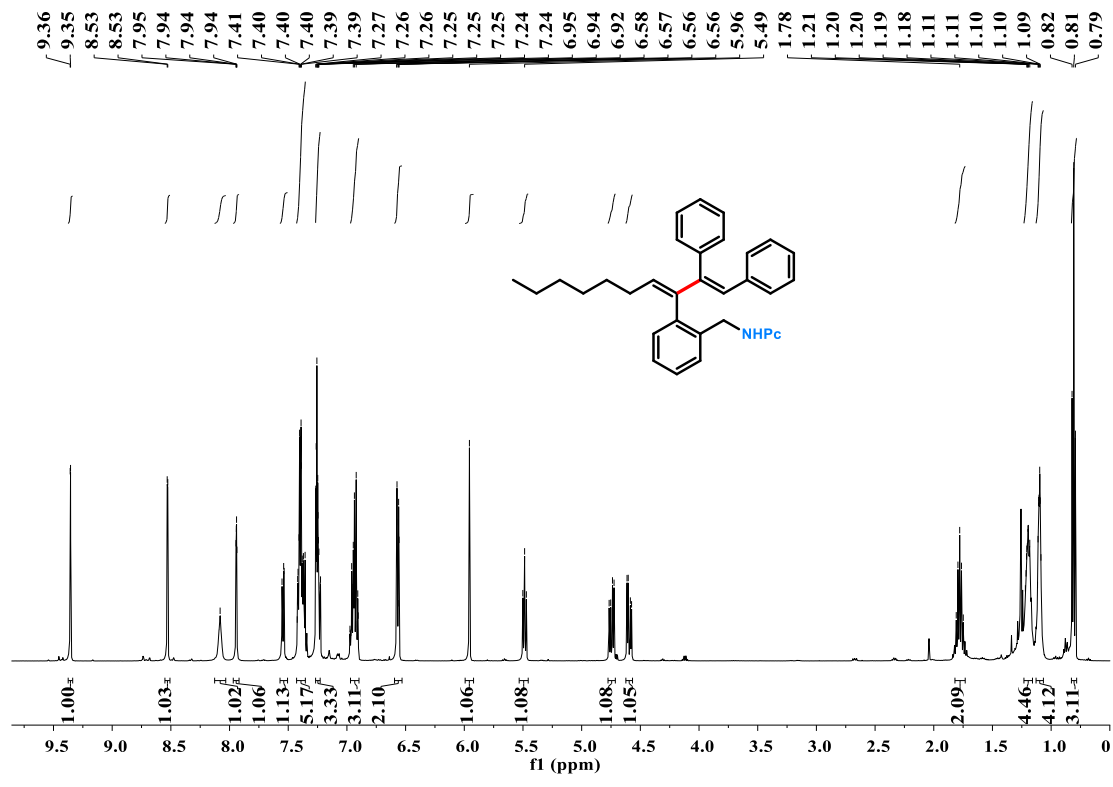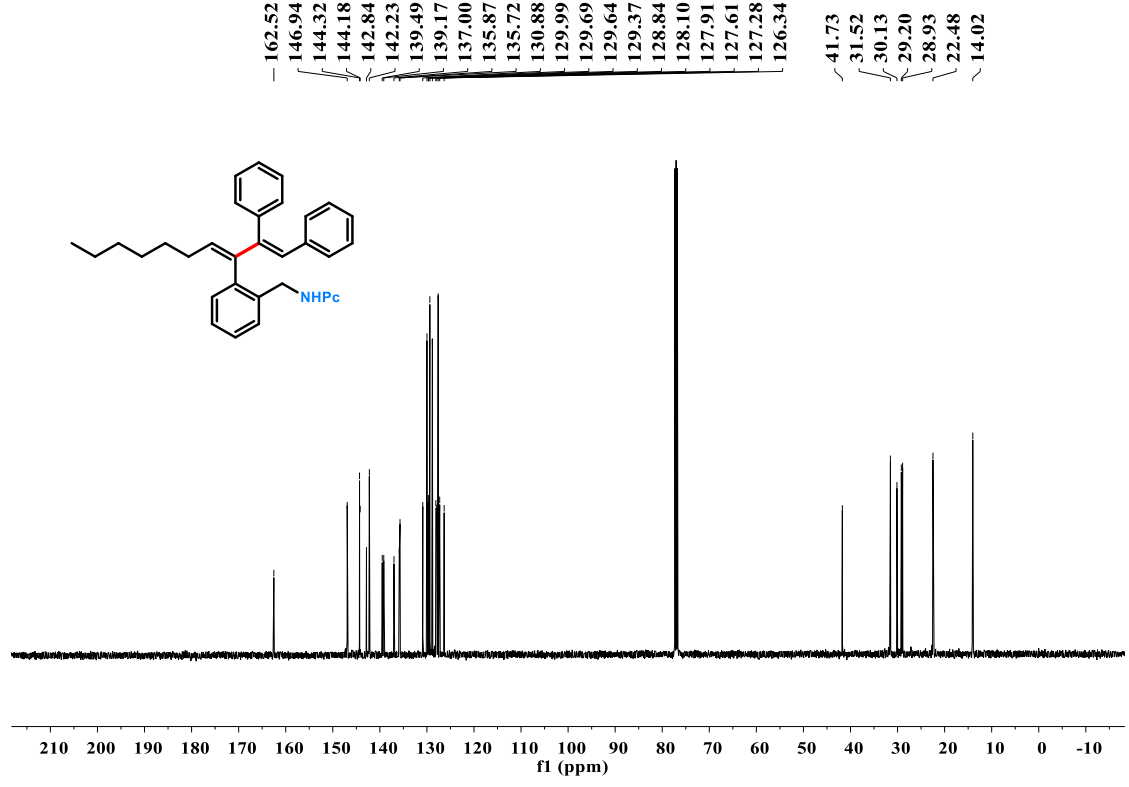

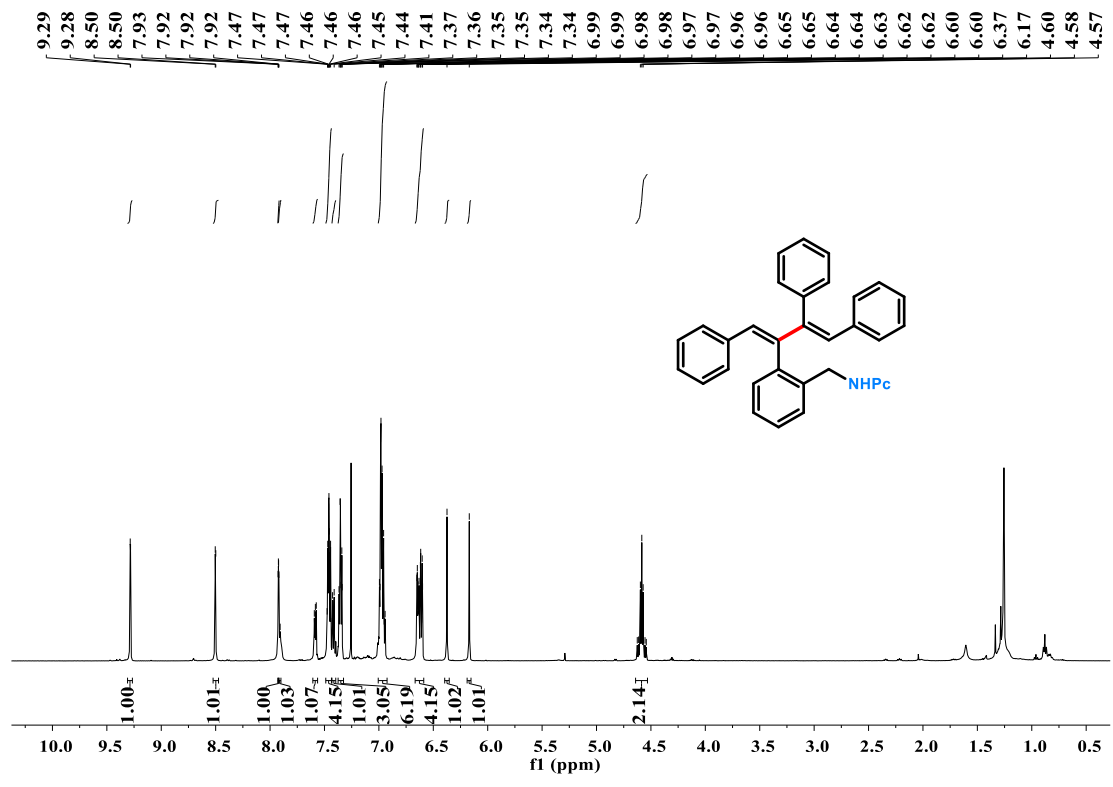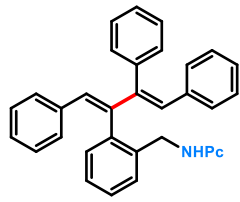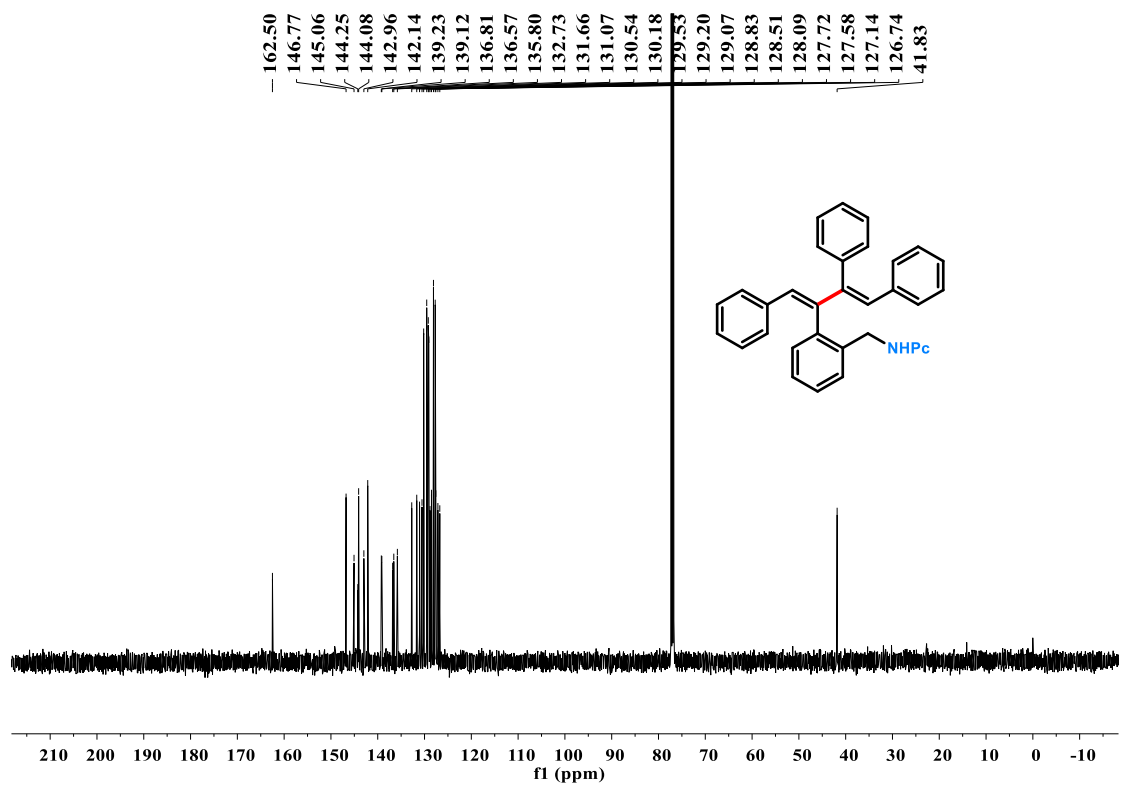

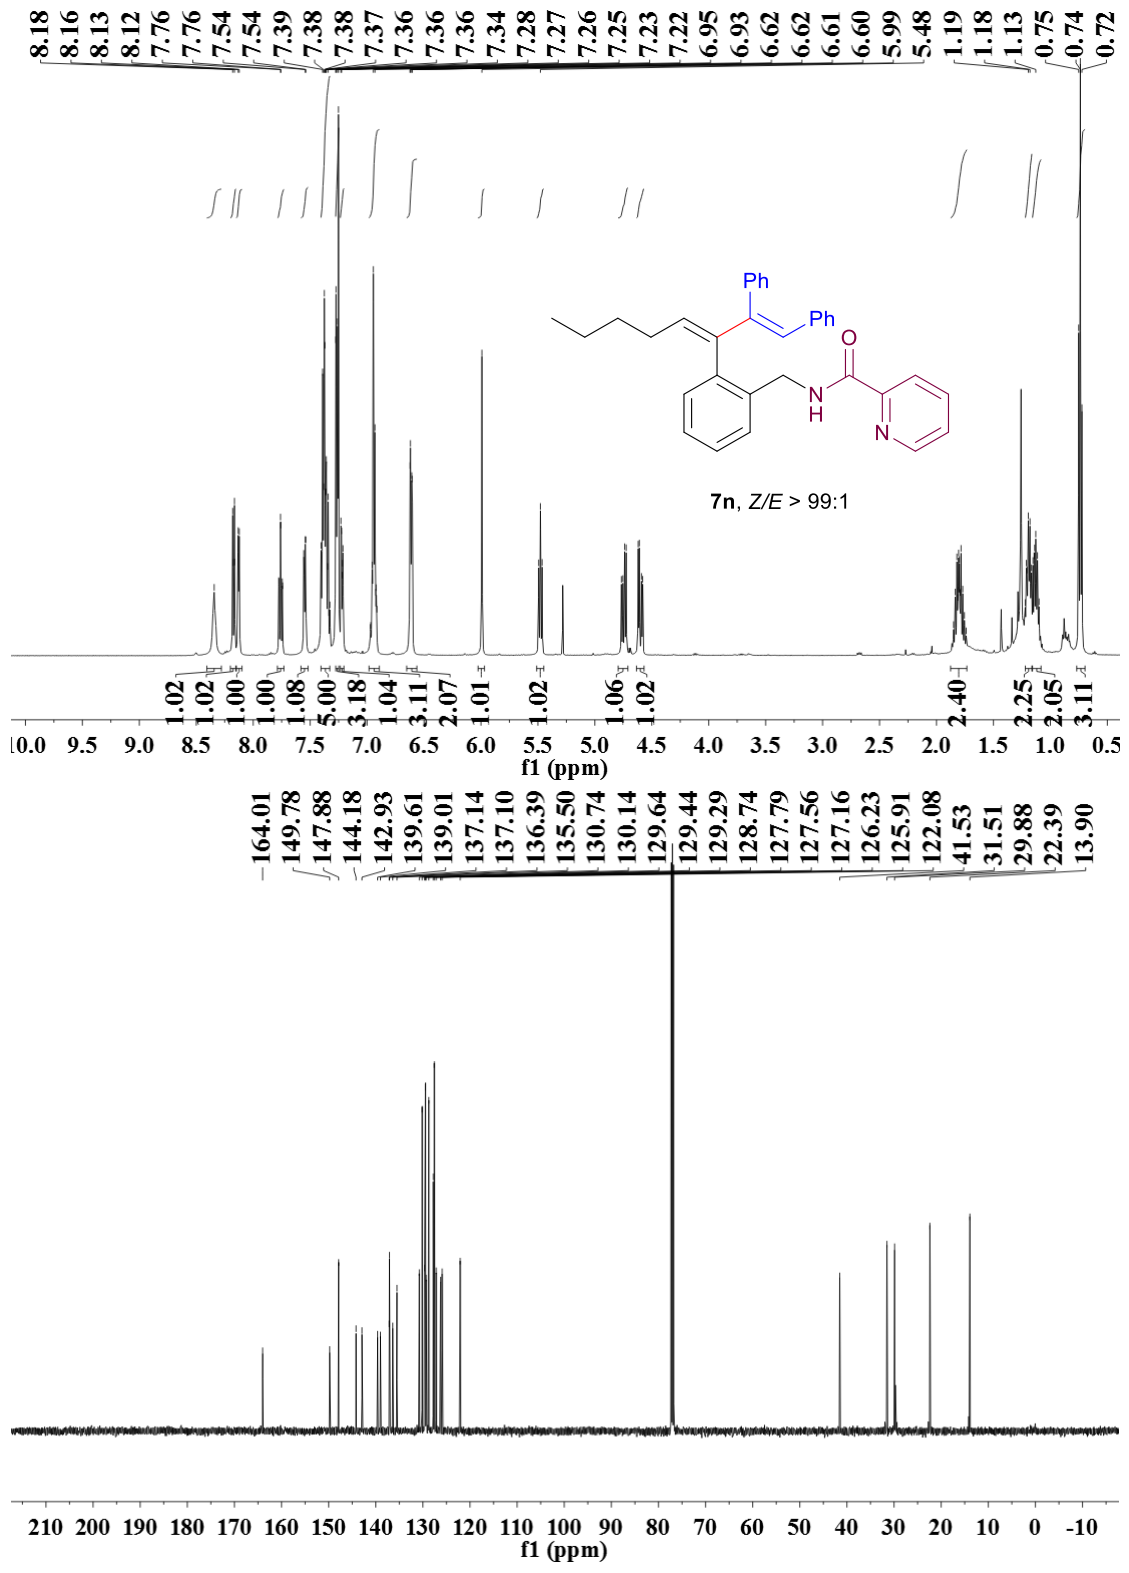

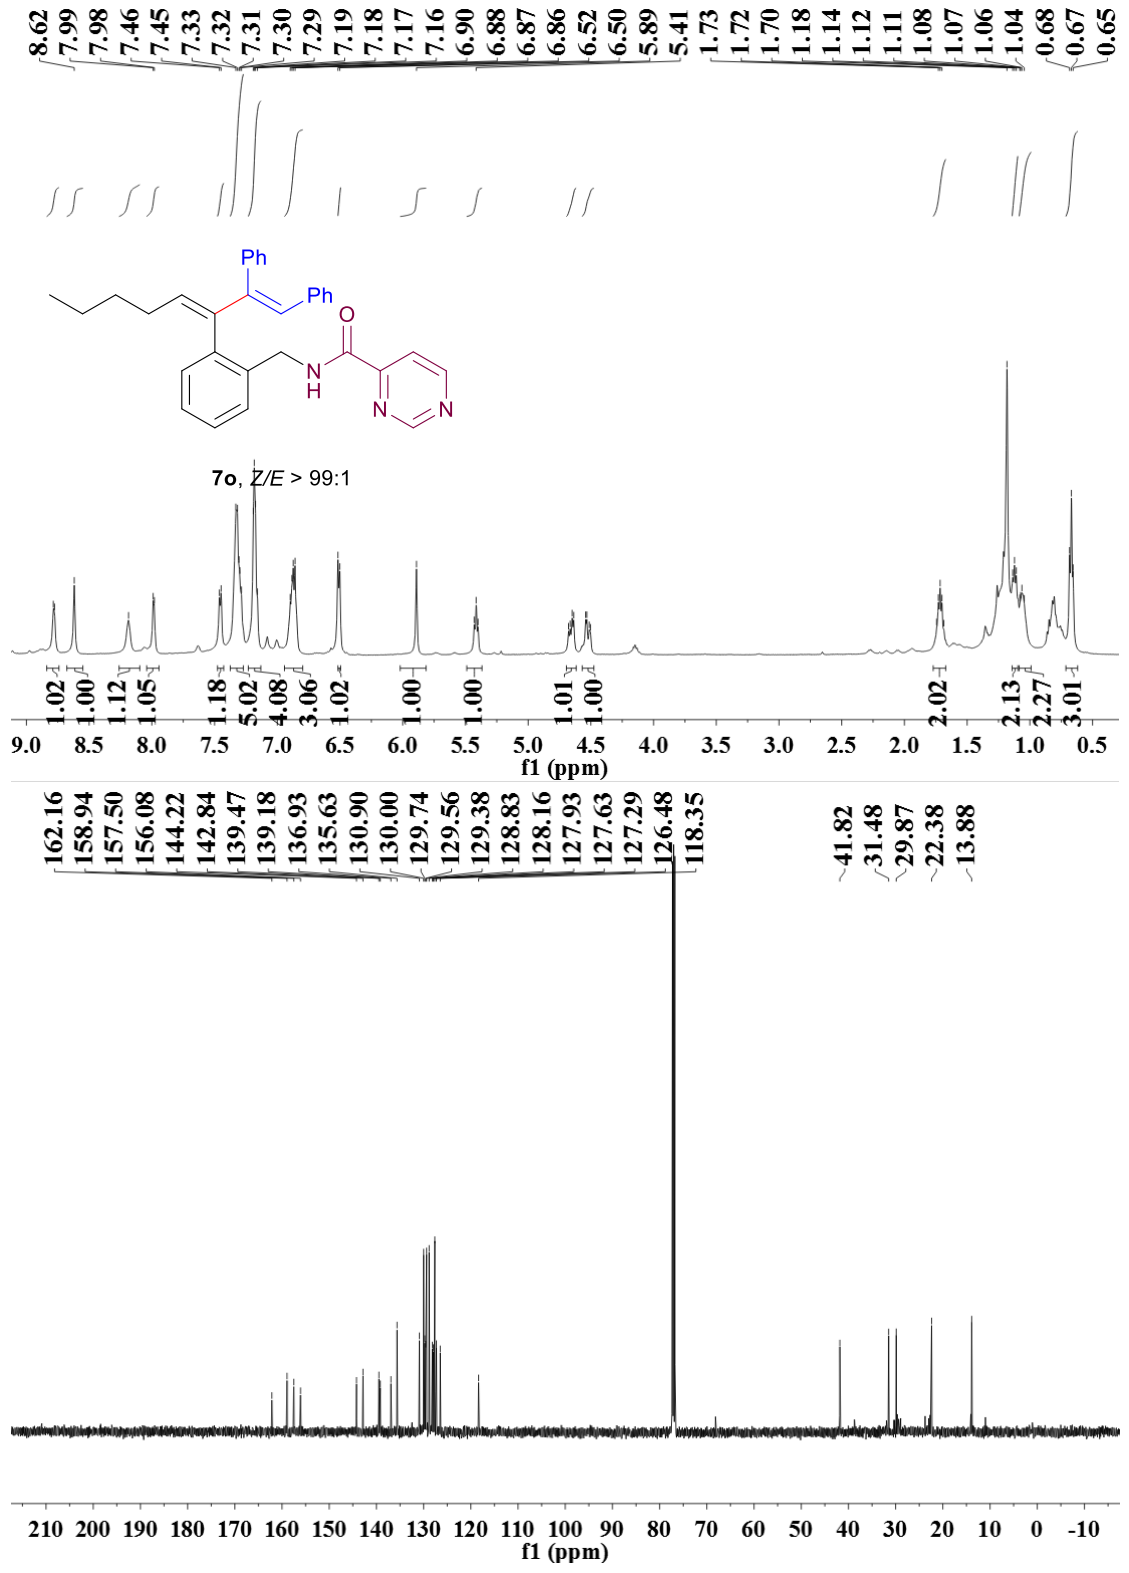

## 8.4 NMR Spectra of Synthetic Applications

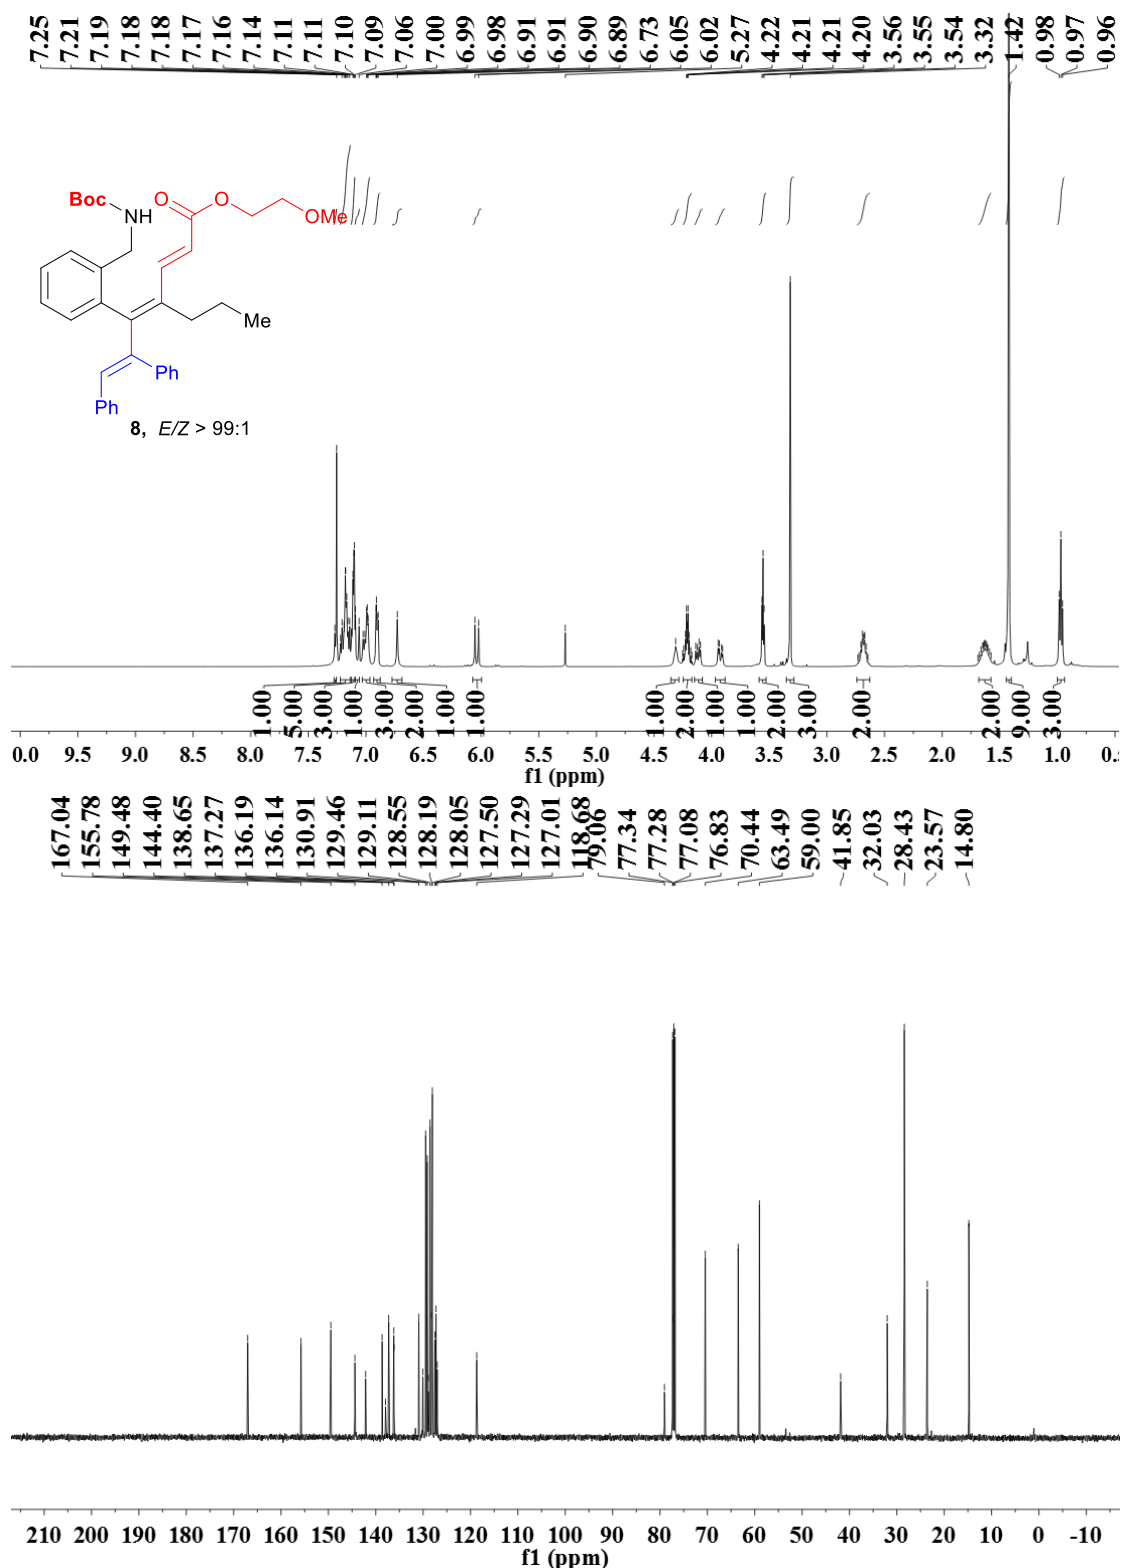

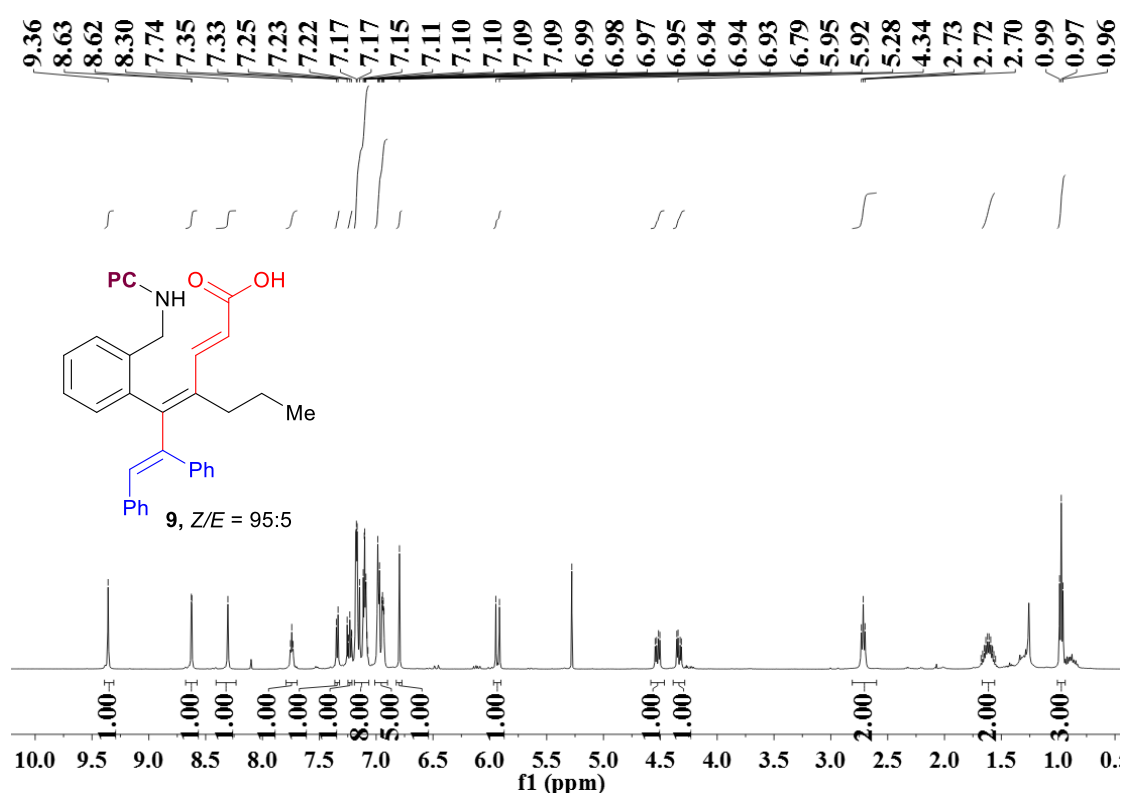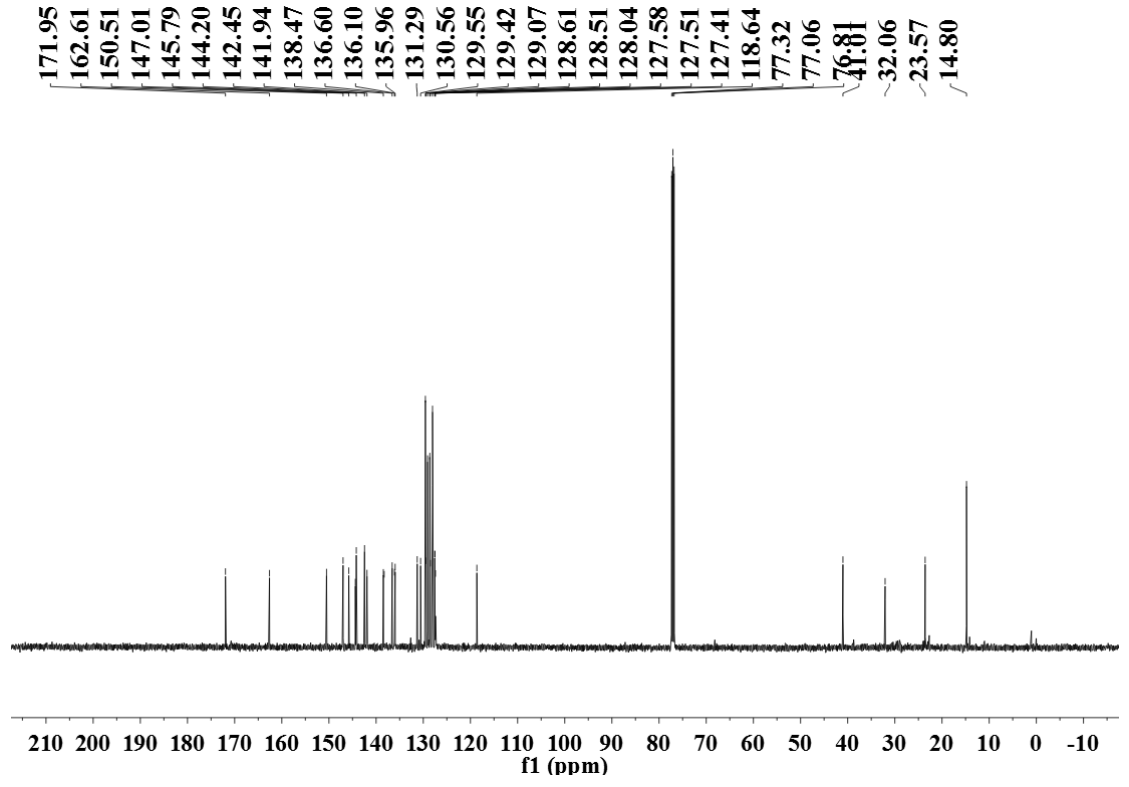

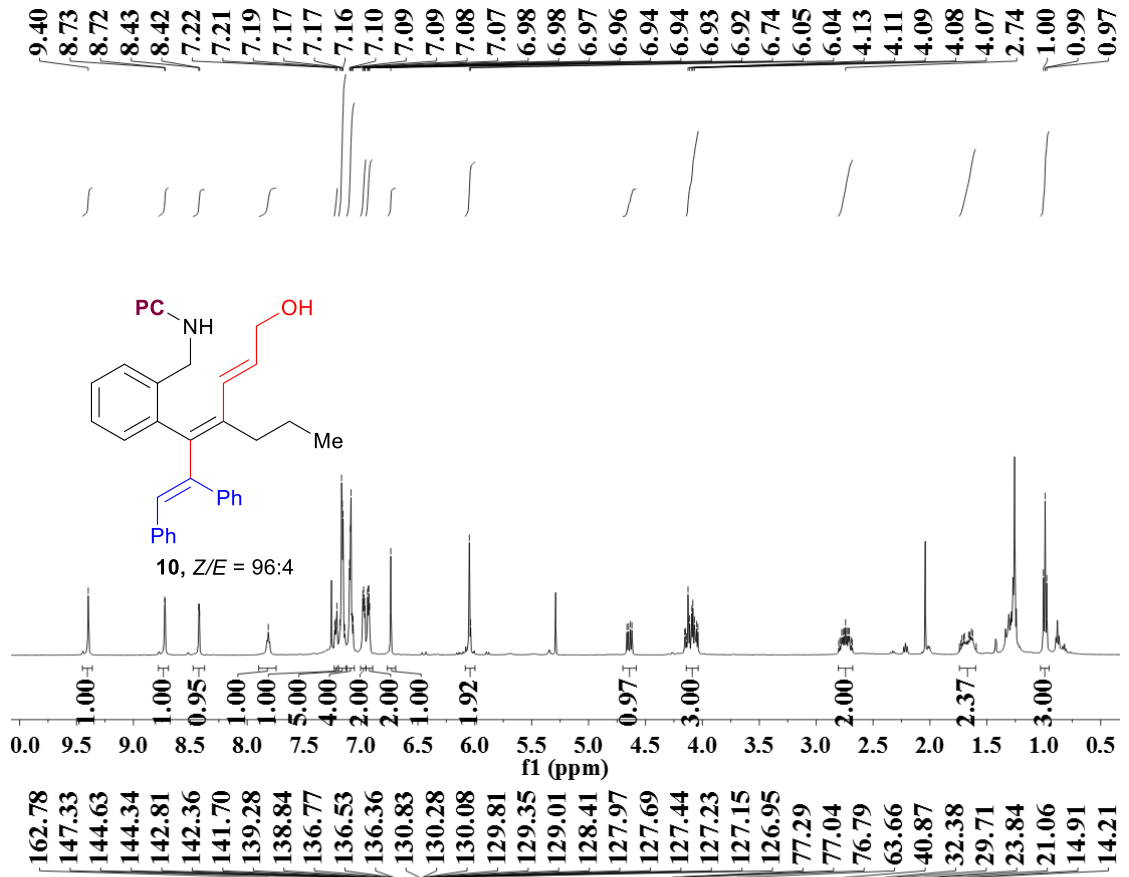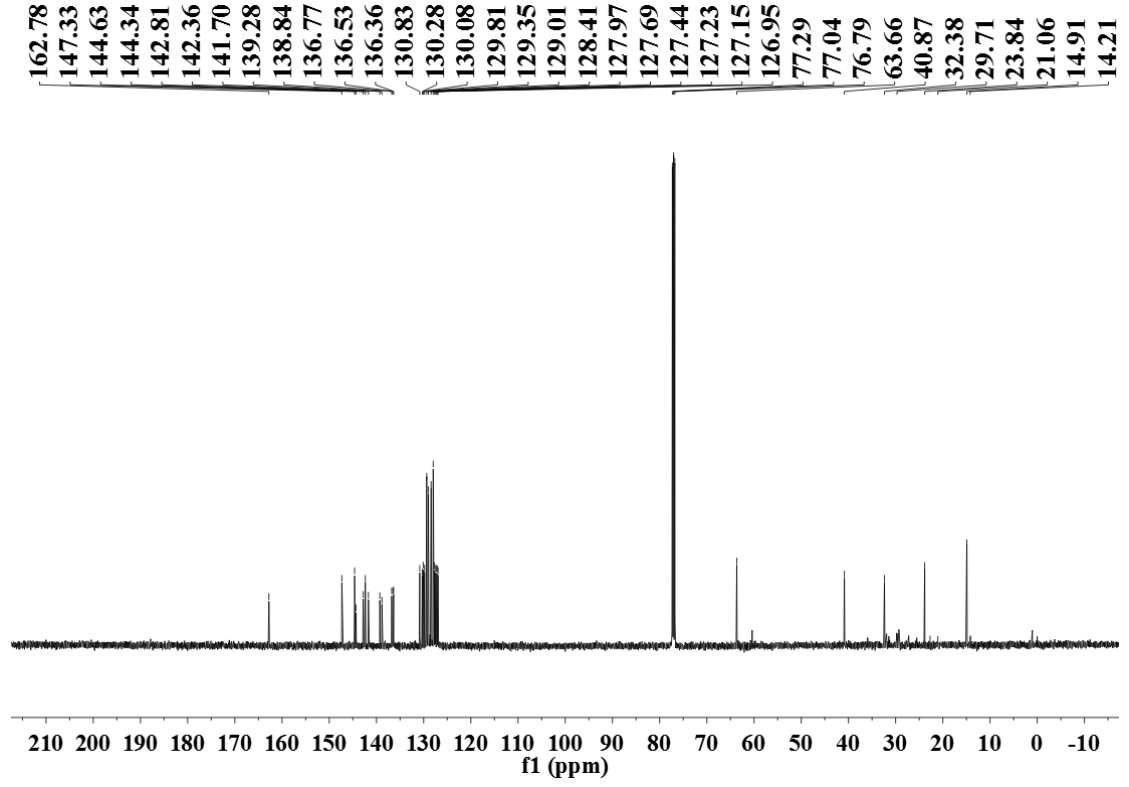



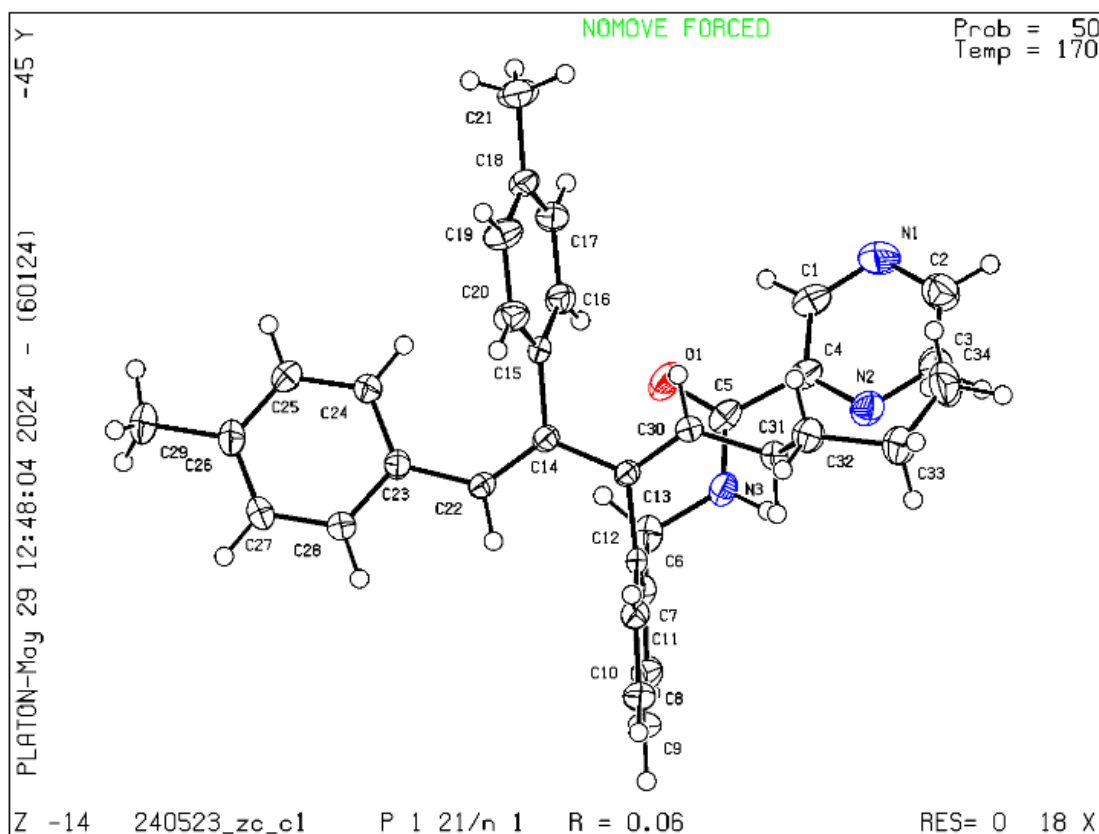

## 240523\_ZC\_C1

**Table 1 Crystal data and structure refinement for 240523\_ZC\_C1.**

|                                    |                                                  |
|------------------------------------|--------------------------------------------------|
| Identification code                | 240523_ZC_C1                                     |
| Empirical formula                  | C <sub>34</sub> H <sub>35</sub> N <sub>3</sub> O |
| Formula weight                     | 501.65                                           |
| Temperature/K                      | 170.00                                           |
| Crystal system                     | monoclinic                                       |
| Space group                        | P2 <sub>1</sub> /n                               |
| a/Å                                | 15.9469(6)                                       |
| b/Å                                | 10.8747(4)                                       |
| c/Å                                | 16.2725(6)                                       |
| α/°                                | 90                                               |
| β/°                                | 96.083(2)                                        |
| γ/°                                | 90                                               |
| Volume/Å <sup>3</sup>              | 2806.05(18)                                      |
| Z                                  | 4                                                |
| ρ <sub>calc</sub> /cm <sup>3</sup> | 1.187                                            |
| μ/mm <sup>-1</sup>                 | 0.354                                            |
| F(000)                             | 1072.0                                           |
| Crystal size/mm <sup>3</sup>       | 0.09 × 0.07 × 0.03                               |
| Radiation                          | GaKα (λ = 1.34139)                               |
| 2θ range for data collection/°     | 6.42 to 121.408                                  |
| Index ranges                       | -20 ≤ h ≤ 20, -11 ≤ k ≤ 14, -21 ≤ l ≤ 21         |
| Reflections collected              | 42541                                            |

Independent reflections 6394 [ $R_{\text{int}} = 0.0640$ ,  $R_{\text{sigma}} = 0.0530$ ]  
 Data/restraints/parameters 6394/0/346  
 Goodness-of-fit on  $F^2$  1.149  
 Final R indexes [ $I \geq 2\sigma(I)$ ]  $R_1 = 0.0596$ ,  $wR_2 = 0.1530$   
 Final R indexes [all data]  $R_1 = 0.0744$ ,  $wR_2 = 0.1601$   
 Largest diff. peak/hole /  $e \text{ \AA}^{-3}$  0.27/-0.27

**Table 2 Fractional Atomic Coordinates ( $\times 10^4$ ) and Equivalent Isotropic Displacement Parameters ( $\text{\AA}^2 \times 10^3$ ) for 240523\_ZC\_C1.  $U_{\text{eq}}$  is defined as 1/3 of the trace of the orthogonalised  $U_{ij}$  tensor.**

| Atom | <i>x</i>    | <i>y</i>     | <i>z</i>    | $U(\text{eq})$ |
|------|-------------|--------------|-------------|----------------|
| O1   | 6372.5 (8)  | 6005.8 (11)  | 6141.5 (8)  | 42.0 (3)       |
| N1   | 8404.5 (11) | 6215.0 (14)  | 7926.3 (11) | 46.5 (4)       |
| C1   | 7775.9 (12) | 6114.4 (16)  | 7319.3 (12) | 40.9 (4)       |
| N2   | 7473.9 (9)  | 4046.5 (13)  | 7639.1 (9)  | 35.4 (3)       |
| C2   | 8563.6 (12) | 5212.6 (18)  | 8382.2 (12) | 42.1 (4)       |
| N3   | 6178.0 (8)  | 3973.3 (12)  | 6370.5 (8)  | 28.7 (3)       |
| C3   | 8114.8 (11) | 4133.9 (18)  | 8236.1 (12) | 41.4 (4)       |
| C4   | 7303.9 (10) | 5052.4 (14)  | 7182.9 (10) | 30.0 (4)       |
| C5   | 6574.9 (10) | 5042.4 (14)  | 6512.5 (11) | 30.3 (4)       |
| C6   | 5455.9 (10) | 3880.6 (16)  | 5737.2 (10) | 31.4 (4)       |
| C7   | 4830.4 (9)  | 2919.7 (14)  | 5934.4 (9)  | 26.2 (3)       |
| C8   | 4733.7 (11) | 1840.5 (16)  | 5469.3 (11) | 36.7 (4)       |
| C9   | 4167.3 (12) | 939.8 (16)   | 5650.9 (12) | 40.9 (5)       |
| C10  | 3687.6 (11) | 1100.6 (15)  | 6296.4 (12) | 36.8 (4)       |
| C11  | 3765.6 (10) | 2178.4 (14)  | 6757.1 (10) | 28.2 (3)       |
| C12  | 4325.2 (9)  | 3098.9 (13)  | 6576.7 (9)  | 21.7 (3)       |
| C13  | 4350.2 (8)  | 4276.7 (13)  | 7058.8 (9)  | 21.0 (3)       |
| C14  | 3858.4 (9)  | 5330.8 (13)  | 6678.2 (9)  | 21.7 (3)       |
| C15  | 3963.9 (9)  | 6532.5 (13)  | 7125.6 (9)  | 22.3 (3)       |
| C16  | 4660.6 (9)  | 7278.8 (14)  | 7056.8 (10) | 27.6 (3)       |
| C17  | 4734.2 (10) | 8401.5 (15)  | 7463.9 (10) | 31.1 (4)       |
| C18  | 4130.4 (11) | 8808.5 (14)  | 7952.3 (10) | 29.8 (4)       |
| C19  | 3436.2 (11) | 8062.2 (15)  | 8017.3 (11) | 35.4 (4)       |
| C20  | 3360.3 (10) | 6933.4 (15)  | 7613.7 (11) | 31.8 (4)       |
| C21  | 4229.8 (13) | 10011.6 (16) | 8414.7 (12) | 42.4 (5)       |
| C22  | 3334.7 (9)  | 5192.0 (13)  | 5979.8 (9)  | 23.3 (3)       |
| C23  | 2796.5 (9)  | 6095.2 (13)  | 5497.1 (9)  | 23.6 (3)       |
| C24  | 2877.6 (11) | 7375.6 (15)  | 5548.2 (11) | 34.2 (4)       |
| C25  | 2351.1 (12) | 8138.1 (15)  | 5041.7 (11) | 39.0 (4)       |

**Table 2 Fractional Atomic Coordinates ( $\times 10^4$ ) and Equivalent Isotropic Displacement Parameters ( $\text{\AA}^2 \times 10^3$ ) for 240523\_ZC\_C1.  $U_{\text{eq}}$  is defined as 1/3 of the trace of the orthogonalised  $U_{ij}$  tensor.**

| Atom | <i>x</i>    | <i>y</i>    | <i>z</i>    | $U(\text{eq})$ |
|------|-------------|-------------|-------------|----------------|
| C26  | 1723.8 (10) | 7671.2 (16) | 4471.9 (10) | 32.0 (4)       |
| C27  | 1641.6 (10) | 6404.0 (15) | 4417.1 (10) | 31.5 (4)       |
| C28  | 2171.6 (9)  | 5635.4 (14) | 4911.2 (10) | 28.2 (3)       |
| C29  | 1153.3 (12) | 8514.7 (18) | 3927.9 (12) | 45.7 (5)       |
| C30  | 4780.6 (9)  | 4359.0 (13) | 7810.2 (9)  | 24.0 (3)       |
| C31  | 5318.2 (10) | 3389.9 (14) | 8253.5 (9)  | 26.8 (3)       |
| C32  | 5095.1 (11) | 3147.2 (16) | 9128.0 (10) | 34.9 (4)       |
| C33  | 5751.5 (13) | 2368.8 (17) | 9647.0 (12) | 45.2 (5)       |
| C34  | 6579.0 (14) | 3032 (2)    | 9878.8 (14) | 57.0 (6)       |

**Table 3 Anisotropic Displacement Parameters ( $\text{\AA}^2 \times 10^3$ ) for 240523\_ZC\_C1. The Anisotropic displacement factor exponent takes the form:  $-2\pi^2[h^2a^2U_{11}+2hka*b*U_{12}+\dots]$ .**

| Atom | $U_{11}$  | $U_{22}$  | $U_{33}$  | $U_{23}$  | $U_{13}$  | $U_{12}$  |
|------|-----------|-----------|-----------|-----------|-----------|-----------|
| O1   | 45.8 (7)  | 25.8 (6)  | 54.1 (8)  | 10.0 (5)  | 2.9 (6)   | 6.4 (5)   |
| N1   | 51.4 (10) | 32.0 (8)  | 54.7 (10) | -3.5 (7)  | -0.9 (8)  | -10.6 (7) |
| C1   | 49.6 (11) | 23.2 (8)  | 49.4 (11) | 1.2 (7)   | 2.7 (9)   | -2.1 (7)  |
| N2   | 30.6 (7)  | 27.8 (7)  | 47.4 (9)  | 6.0 (6)   | 1.5 (6)   | -2.8 (6)  |
| C2   | 38.4 (10) | 43.1 (11) | 43.9 (11) | -1.3 (8)  | 0.2 (8)   | -5.5 (8)  |
| N3   | 25.3 (6)  | 24.8 (7)  | 35.8 (7)  | 6.1 (5)   | 2.4 (5)   | 2.7 (5)   |
| C3   | 36.0 (9)  | 37.7 (10) | 49.1 (11) | 10.0 (8)  | -1.7 (8)  | -4.3 (8)  |
| C4   | 30.8 (8)  | 22.4 (8)  | 38.2 (9)  | -0.5 (6)  | 10.3 (7)  | 2.3 (6)   |
| C5   | 30.5 (8)  | 23.9 (8)  | 37.9 (9)  | 2.3 (7)   | 9.8 (7)   | 6.0 (6)   |
| C6   | 29.7 (8)  | 36.0 (9)  | 28.6 (8)  | 5.4 (7)   | 3.6 (6)   | 5.6 (7)   |
| C7   | 25.5 (7)  | 25.6 (8)  | 26.0 (8)  | 0.7 (6)   | -4.7 (6)  | 7.5 (6)   |
| C8   | 40.0 (9)  | 37.0 (10) | 31.9 (9)  | -8.4 (7)  | -2.2 (7)  | 13.2 (8)  |
| C9   | 47.4 (10) | 25.3 (8)  | 45.9 (11) | -13.5 (7) | -13.8 (8) | 6.1 (8)   |
| C10  | 35.0 (9)  | 22.6 (8)  | 49.8 (11) | -2.5 (7)  | -9.7 (8)  | -2.9 (7)  |
| C11  | 26.9 (8)  | 22.1 (8)  | 34.2 (9)  | 1.1 (6)   | -3.3 (6)  | 0.5 (6)   |
| C12  | 19.8 (7)  | 18.3 (7)  | 25.2 (7)  | -0.5 (5)  | -6.8 (5)  | 3.9 (5)   |
| C13  | 19.0 (7)  | 16.9 (7)  | 26.9 (7)  | 0.2 (5)   | 0.8 (5)   | 0.5 (5)   |
| C14  | 19.9 (7)  | 18.2 (7)  | 26.7 (7)  | 0.7 (6)   | 1.7 (5)   | 0.5 (5)   |
| C15  | 23.1 (7)  | 18.0 (7)  | 24.5 (7)  | 1.7 (6)   | -3.8 (6)  | 3.3 (6)   |
| C16  | 24.1 (7)  | 26.2 (8)  | 32.4 (8)  | -0.1 (6)  | 2.7 (6)   | 0.8 (6)   |
| C17  | 29.7 (8)  | 23.5 (8)  | 39.3 (9)  | 0.9 (7)   | -0.4 (7)  | -6.1 (6)  |
| C18  | 40.4 (9)  | 18.8 (7)  | 28.8 (8)  | 0.2 (6)   | -3.0 (7)  | 2.6 (6)   |
| C19  | 39.6 (9)  | 28.3 (9)  | 40.3 (10) | -5.4 (7)  | 13.4 (7)  | 3.0 (7)   |
| C20  | 28.0 (8)  | 26.0 (8)  | 42.3 (10) | -2.7 (7)  | 7.5 (7)   | -2.7 (6)  |
| C21  | 62.7 (12) | 23.8 (9)  | 39.9 (10) | -5.8 (7)  | 1.7 (9)   | -1.0 (8)  |

**Table 3 Anisotropic Displacement Parameters ( $\text{\AA}^2 \times 10^3$ ) for 240523\_ZC\_C1. The Anisotropic displacement factor exponent takes the form:  $-2\pi^2[h^2a^{*2}U_{11}+2hka^*b^*U_{12}+\dots]$ .**

| Atom | $U_{11}$  | $U_{22}$  | $U_{33}$  | $U_{23}$  | $U_{13}$   | $U_{12}$  |
|------|-----------|-----------|-----------|-----------|------------|-----------|
| C22  | 23.0 (7)  | 16.8 (7)  | 29.5 (8)  | -0.1 (6)  | -0.5 (6)   | 0.8 (5)   |
| C23  | 21.8 (7)  | 23.7 (7)  | 24.7 (8)  | 1.9 (6)   | -0.1 (6)   | 1.9 (6)   |
| C24  | 36.8 (9)  | 22.3 (8)  | 39.8 (10) | 1.3 (7)   | -13.4 (7)  | -0.5 (7)  |
| C25  | 45.9 (10) | 21.6 (8)  | 46.1 (10) | 3.1 (7)   | -11.4 (8)  | 2.8 (7)   |
| C26  | 30.0 (8)  | 34.7 (9)  | 30.1 (9)  | 5.7 (7)   | -2.9 (7)   | 6.5 (7)   |
| C27  | 28.3 (8)  | 33.9 (9)  | 30.0 (8)  | 0.7 (7)   | -7.6 (6)   | 1.0 (7)   |
| C28  | 29.1 (8)  | 22.8 (7)  | 31.2 (8)  | -0.7 (6)  | -3.2 (6)   | -0.1 (6)  |
| C29  | 48.8 (11) | 39.0 (10) | 45.3 (11) | 10.3 (8)  | -13.8 (9)  | 10.9 (9)  |
| C30  | 24.8 (7)  | 19.2 (7)  | 27.2 (8)  | -2.1 (6)  | -1.4 (6)   | 0.8 (6)   |
| C31  | 29.1 (8)  | 22.9 (7)  | 26.8 (8)  | 0.1 (6)   | -4.9 (6)   | 2.7 (6)   |
| C32  | 40.8 (9)  | 31.1 (9)  | 31.7 (9)  | 5.5 (7)   | -0.8 (7)   | 0.3 (7)   |
| C33  | 60.0 (12) | 35.0 (10) | 37.0 (10) | 11.4 (8)  | -11.9 (9)  | 0.7 (9)   |
| C34  | 61.5 (13) | 53.4 (13) | 49.5 (12) | 14.3 (10) | -24.5 (10) | -2.1 (10) |

**Table 4 Bond Lengths for 240523\_ZC\_C1.**

| Atom | Atom | Length/ $\text{\AA}$ | Atom | Atom | Length/ $\text{\AA}$ |
|------|------|----------------------|------|------|----------------------|
| O1   | C5   | 1.2349 (19)          | C14  | C22  | 1.346 (2)            |
| N1   | C1   | 1.335 (2)            | C15  | C16  | 1.390 (2)            |
| N1   | C2   | 1.328 (2)            | C15  | C20  | 1.382 (2)            |
| C1   | C4   | 1.384 (2)            | C16  | C17  | 1.388 (2)            |
| N2   | C3   | 1.337 (2)            | C17  | C18  | 1.385 (2)            |
| N2   | C4   | 1.334 (2)            | C18  | C19  | 1.386 (2)            |
| C2   | C3   | 1.382 (3)            | C18  | C21  | 1.509 (2)            |
| N3   | C5   | 1.332 (2)            | C19  | C20  | 1.391 (2)            |
| N3   | C6   | 1.465 (2)            | C22  | C23  | 1.475 (2)            |
| C4   | C5   | 1.508 (2)            | C23  | C24  | 1.400 (2)            |
| C6   | C7   | 1.503 (2)            | C23  | C28  | 1.397 (2)            |
| C7   | C8   | 1.396 (2)            | C24  | C25  | 1.387 (2)            |
| C7   | C12  | 1.399 (2)            | C25  | C26  | 1.386 (2)            |
| C8   | C9   | 1.385 (3)            | C26  | C27  | 1.386 (2)            |
| C9   | C10  | 1.375 (3)            | C26  | C29  | 1.511 (2)            |
| C10  | C11  | 1.390 (2)            | C27  | C28  | 1.384 (2)            |
| C11  | C12  | 1.393 (2)            | C30  | C31  | 1.495 (2)            |
| C12  | C13  | 1.5003 (19)          | C31  | C32  | 1.526 (2)            |
| C13  | C14  | 1.4865 (19)          | C32  | C33  | 1.529 (2)            |
| C13  | C30  | 1.340 (2)            | C33  | C34  | 1.516 (3)            |
| C14  | C15  | 1.497 (2)            |      |      |                      |

**Table 5 Bond Angles for 240523\_ZC\_C1.**

| Atom | Atom | Atom | Angle/°     | Atom | Atom | Atom | Angle/°     |
|------|------|------|-------------|------|------|------|-------------|
| C2   | N1   | C1   | 115.47 (16) | C22  | C14  | C13  | 121.21 (13) |
| N1   | C1   | C4   | 122.70 (17) | C22  | C14  | C15  | 122.44 (13) |
| C4   | N2   | C3   | 116.17 (15) | C16  | C15  | C14  | 121.34 (13) |
| N1   | C2   | C3   | 122.42 (17) | C20  | C15  | C14  | 120.39 (13) |
| C5   | N3   | C6   | 120.37 (13) | C20  | C15  | C16  | 118.26 (14) |
| N2   | C3   | C2   | 121.84 (17) | C17  | C16  | C15  | 120.20 (15) |
| C1   | C4   | C5   | 119.13 (15) | C18  | C17  | C16  | 121.75 (15) |
| N2   | C4   | C1   | 121.35 (16) | C17  | C18  | C19  | 117.80 (14) |
| N2   | C4   | C5   | 119.51 (14) | C17  | C18  | C21  | 121.37 (15) |
| O1   | C5   | N3   | 124.11 (16) | C19  | C18  | C21  | 120.81 (16) |
| O1   | C5   | C4   | 119.29 (15) | C18  | C19  | C20  | 120.73 (15) |
| N3   | C5   | C4   | 116.59 (14) | C15  | C20  | C19  | 121.24 (15) |
| N3   | C6   | C7   | 112.81 (13) | C14  | C22  | C23  | 130.48 (14) |
| C8   | C7   | C6   | 120.43 (15) | C24  | C23  | C22  | 125.86 (13) |
| C8   | C7   | C12  | 118.87 (15) | C28  | C23  | C22  | 117.25 (13) |
| C12  | C7   | C6   | 120.69 (14) | C28  | C23  | C24  | 116.83 (13) |
| C9   | C8   | C7   | 121.05 (17) | C25  | C24  | C23  | 120.85 (15) |
| C10  | C9   | C8   | 120.09 (15) | C26  | C25  | C24  | 121.79 (15) |
| C9   | C10  | C11  | 119.62 (16) | C25  | C26  | C27  | 117.62 (14) |
| C10  | C11  | C12  | 121.01 (16) | C25  | C26  | C29  | 121.11 (16) |
| C7   | C12  | C13  | 121.60 (13) | C27  | C26  | C29  | 121.27 (15) |
| C11  | C12  | C7   | 119.32 (14) | C28  | C27  | C26  | 121.02 (15) |
| C11  | C12  | C13  | 119.04 (14) | C27  | C28  | C23  | 121.87 (15) |
| C14  | C13  | C12  | 117.18 (12) | C13  | C30  | C31  | 127.24 (13) |
| C30  | C13  | C12  | 121.11 (12) | C30  | C31  | C32  | 113.17 (13) |
| C30  | C13  | C14  | 121.68 (13) | C31  | C32  | C33  | 113.40 (15) |
| C13  | C14  | C15  | 116.33 (12) | C34  | C33  | C32  | 113.65 (15) |

**Table 6 Torsion Angles for 240523\_ZC\_C1.**

| A  | B  | C  | D  | Angle/°     | A   | B   | C   | D   | Angle/°     |
|----|----|----|----|-------------|-----|-----|-----|-----|-------------|
| N1 | C1 | C4 | N2 | -2.4 (3)    | C13 | C14 | C15 | C16 | 79.63 (18)  |
| N1 | C1 | C4 | C5 | 176.67 (16) | C13 | C14 | C15 | C20 | -           |
| N1 | C2 | C3 | N2 | -2.0 (3)    | C13 | C14 | C22 | C23 | 179.58 (14) |
| C1 | N1 | C2 | C3 | 0.5 (3)     | C13 | C30 | C31 | C32 | -           |
| C1 | C4 | C5 | O1 | -5.5 (2)    | C14 | C13 | C30 | C31 | 128.31 (17) |
| C1 | C4 | C5 | N3 | 175.60 (15) | C14 | C15 | C16 | C17 | 178.07 (14) |
| N2 | C4 | C5 | O1 | 173.56 (15) | C14 | C15 | C20 | C19 | 178.59 (14) |
|    |    |    |    |             |     |     |     |     | -           |

**Table 6 Torsion Angles for 240523\_ZC\_C1.**

| A   | B   | C   | D   | Angle/°     | A   | B   | C   | D   | Angle/°     |
|-----|-----|-----|-----|-------------|-----|-----|-----|-----|-------------|
|     |     |     |     |             |     |     |     |     | 178.31 (15) |
| N2  | C4  | C5  | N3  | -5.3 (2)    | C14 | C22 | C23 | C24 | 17.7 (3)    |
| C2  | N1  | C1  | C4  | 1.7 (3)     | C14 | C22 | C23 | C28 | 165.11 (16) |
| N3  | C6  | C7  | C8  | 110.33 (16) | C15 | C14 | C22 | C23 | 2.0 (2)     |
| N3  | C6  | C7  | C12 | 70.77 (18)  | C15 | C16 | C17 | C18 | 0.6 (2)     |
| C3  | N2  | C4  | C1  | 0.8 (2)     | C16 | C15 | C20 | C19 | 1.0 (2)     |
| C3  | N2  | C4  | C5  | 178.25 (15) | C16 | C17 | C18 | C19 | -0.8 (2)    |
| C4  | N2  | C3  | C2  | 1.3 (3)     | C16 | C17 | C18 | C21 | 177.99 (15) |
| C5  | N3  | C6  | C7  | 149.87 (15) | C17 | C18 | C19 | C20 | 1.0 (3)     |
| C6  | N3  | C5  | O1  | 0.5 (2)     | C18 | C19 | C20 | C15 | -1.2 (3)    |
| C6  | N3  | C5  | C4  | 179.27 (13) | C20 | C15 | C16 | C17 | -0.7 (2)    |
| C6  | C7  | C8  | C9  | 179.16 (15) | C21 | C18 | C19 | C20 | 177.73 (16) |
| C6  | C7  | C12 | C11 | 178.48 (13) | C22 | C14 | C15 | C16 | 101.88 (17) |
| C6  | C7  | C12 | C13 | 3.6 (2)     | C22 | C14 | C15 | C20 | 77.4 (2)    |
| C7  | C8  | C9  | C10 | 0.1 (3)     | C22 | C23 | C24 | C25 | 177.78 (16) |
| C7  | C12 | C13 | C14 | 80.65 (17)  | C22 | C23 | C28 | C27 | 178.99 (15) |
| C7  | C12 | C13 | C30 | 101.10 (17) | C23 | C24 | C25 | C26 | 0.4 (3)     |
| C8  | C7  | C12 | C11 | 2.6 (2)     | C24 | C23 | C28 | C27 | -1.6 (2)    |
| C8  | C7  | C12 | C13 | 175.33 (13) | C24 | C25 | C26 | C27 | -0.6 (3)    |
| C8  | C9  | C10 | C11 | 0.9 (2)     | C24 | C25 | C26 | C29 | 179.71 (18) |
| C9  | C10 | C11 | C12 | -0.2 (2)    | C25 | C26 | C27 | C28 | -0.4 (3)    |
| C10 | C11 | C12 | C7  | -1.6 (2)    | C26 | C27 | C28 | C23 | 1.5 (3)     |
| C10 | C11 | C12 | C13 | 176.41 (13) | C28 | C23 | C24 | C25 | 0.6 (3)     |
| C11 | C12 | C13 | C14 | -97.29 (16) | C29 | C26 | C27 | C28 | 179.33 (17) |
| C11 | C12 | C13 | C30 | 80.96 (18)  | C30 | C13 | C14 | C15 | 8.0 (2)     |
| C12 | C7  | C8  | C9  | -1.9 (2)    | C30 | C13 | C14 | C22 | 170.50 (14) |
| C12 | C13 | C14 | C15 | 173.75 (12) | C30 | C31 | C32 | C33 | 167.74 (14) |
| C12 | C13 | C14 | C22 | 7.7 (2)     | C31 | C32 | C33 | C34 | 69.6 (2)    |
| C12 | C13 | C30 | C31 | 3.8 (2)     |     |     |     |     |             |

**Table 7 Hydrogen Atom Coordinates ( $\text{\AA}\times 10^4$ ) and Isotropic Displacement Parameters ( $\text{\AA}^2\times 10^3$ ) for 240523\_ZC\_C1.**

| Atom | <i>x</i> | <i>y</i> | <i>z</i> | U(eq) |
|------|----------|----------|----------|-------|
| H1   | 7647.59  | 6800.04  | 6966.51  | 49    |
| H2   | 9002.21  | 5238.03  | 8825.04  | 50    |
| H3   | 6350.5   | 3319.04  | 6658.73  | 34    |
| H3A  | 8265.91  | 3434.6   | 8569.25  | 50    |
| H6A  | 5662.25  | 3680.7   | 5200.21  | 38    |
| H6B  | 5168.89  | 4688.06  | 5680.23  | 38    |
| H8   | 5061.51  | 1721.9   | 5021.18  | 44    |
| H9   | 4110.37  | 210.07   | 5328.84  | 49    |
| H10  | 3304.96  | 478.49   | 6426.89  | 44    |
| H11  | 3432.17  | 2289.06  | 7201.86  | 34    |
| H16  | 5087.67  | 7019.68  | 6730.13  | 33    |
| H17  | 5211.67  | 8904.08  | 7405.84  | 37    |
| H19  | 3007.42  | 8324.22  | 8340.91  | 42    |
| H20  | 2884.6   | 6428.88  | 7674.91  | 38    |
| H21A | 4463.57  | 9856.25  | 8986.69  | 64    |
| H21B | 3678.17  | 10410.14 | 8410.75  | 64    |
| H21C | 4612.1   | 10549.73 | 8146.86  | 64    |
| H22  | 3307.05  | 4380.52  | 5762.42  | 28    |
| H24  | 3298.5   | 7726.92  | 5934.66  | 41    |
| H25  | 2422.47  | 9003.67  | 5086.56  | 47    |
| H27  | 1214.91  | 6057.77  | 4034.6   | 38    |
| H28  | 2108.64  | 4770.53  | 4850.07  | 34    |
| H29A | 1160.55  | 8273.28  | 3348.44  | 69    |
| H29B | 1352.61  | 9364.07  | 4001.46  | 69    |
| H29C | 576.66   | 8454.03  | 4080.81  | 69    |
| H30  | 4739.42  | 5117.68  | 8092.54  | 29    |
| H31A | 5916.37  | 3645.46  | 8281.37  | 32    |
| H31B | 5256.07  | 2615.8   | 7932.61  | 32    |
| H32A | 4543.53  | 2722.13  | 9094.99  | 42    |
| H32B | 5034.62  | 3944.39  | 9409.49  | 42    |
| H33A | 5515.96  | 2111.54  | 10159.12 | 54    |
| H33B | 5862.45  | 1615.98  | 9333.95  | 54    |
| H34A | 6816.94  | 3291.91  | 9375.55  | 85    |
| H34B | 6974.88  | 2476.59  | 10196.07 | 85    |
| H34C | 6480.28  | 3755.1   | 10214.51 | 85    |

### Experimental

Single crystals of  $\text{C}_{34}\text{H}_{35}\text{N}_3\text{O}$  [240523\_ZC\_C1] were [1]. A suitable crystal was selected and [1] on a diffractometer. The crystal was kept at 170.00 K during data collection. Using Olex2 [1], the structure was solved with the SHELXT [2] structure solution program using Intrinsic Phasing and refined with the SHELXL [3] refinement package using Least Squares minimisation.

1. Dolomanov, O.V., Bourhis, L.J., Gildea, R.J., Howard, J.A.K. & Puschmann, H. (2009), *J. Appl. Cryst.* 42, 339-341.
2. Sheldrick, G.M. (2015). *Acta Cryst.* A71, 3-8.
3. Sheldrick, G.M. (2015). *Acta Cryst.* C71, 3-8.

### Crystal structure determination of [240523\_ZC\_C1]

**Crystal Data** for  $C_{34}H_{35}N_3O$  ( $M = 501.65$  g/mol): monoclinic, space group  $P2_1/n$  (no. 14),  $a = 15.9469(6)$  Å,  $b = 10.8747(4)$  Å,  $c = 16.2725(6)$  Å,  $\beta = 96.083(2)^\circ$ ,  $V = 2806.05(18)$  Å<sup>3</sup>,  $Z = 4$ ,  $T = 170.00$  K,  $\mu(\text{GaK}\alpha) = 0.354$  mm<sup>-1</sup>,  $D_{\text{calc}} = 1.187$  g/cm<sup>3</sup>, 42541 reflections measured ( $6.42^\circ \leq 2\theta \leq 121.408^\circ$ ), 6394 unique ( $R_{\text{int}} = 0.0640$ ,  $R_{\text{sigma}} = 0.0530$ ) which were used in all calculations. The final  $R_1$  was 0.0596 ( $I > 2\sigma(I)$ ) and  $wR_2$  was 0.1601 (all data).

### Refinement model description

Number of restraints - 0, number of constraints - unknown.

Details:

1. Fixed Uiso  
At 1.2 times of:  
All C(H) groups, All C(H,H) groups, All N(H) groups  
At 1.5 times of:  
All C(H,H,H) groups
- 2.a Secondary CH2 refined with riding coordinates:  
C6(H6A,H6B), C31(H31A,H31B), C32(H32A,H32B), C33(H33A,H33B)
- 2.b Aromatic/amide H refined with riding coordinates:  
C1(H1), C2(H2), N3(H3), C3(H3A), C8(H8), C9(H9), C10(H10), C11(H11),  
C16(H16),  
C17(H17), C19(H19), C20(H20), C22(H22), C24(H24), C25(H25), C27(H27),  
C28(H28), C30(H30)
- 2.c Idealised Me refined as rotating group:  
C21(H21A,H21B,H21C), C29(H29A,H29B,H29C), C34(H34A,H34B,H34C)

This report has been created with Olex2, compiled on 2022.04.07 svn.rca3783a0 for OlexSys. Please [let us know](#) if there are any errors or if you would like to have additional features.
